# Supplementary material for: Nutrient sensitive protein O-GlcNAcylation modulates the transcriptome through epigenetic mechanisms during embryonic neurogenesis
Source: Life Sci Alliance. 2022 Apr 25;5(8):e202201385. doi: 10.26508/lsa.202201385 (PMC9039347; doi:10.26508/lsa.202201385)
Supplement: Supplemental Data 3. — Ingenuity Pathway Analysis (IPA) was performed on lists of genes affected significantly (P < 0.5) in TMG treated cells compared to control on D30 of neural differentiation. Each file has four sheets corresponding to IPA Pathways, IPA functions, IPA Regulators and IPA Netwroks. Z: z-score of the prediction − positive for increased function (red), negative for inhibited (blue) N: number of genes from the analyzed list in the pathway pos: number of upregulated molecules neg: number of downregulated molecules. [file LSA-2022-01385_Supplemental_Data_3.xlsx]

## Sheet: Function
Category	Functions or Diseases	p	State	Z	N	Pos	Neg	Molecules
Cancer,Organismal Injury and Abnormalities	Non-hematological solid tumor	2.58e-87		0.092	1876	1289	587	A2M(+4.05),ABCA12(+2.54),ABCA8(+3.17),ABCC4(-2.19),ABCC5(+1.68),ABCC8(+4.12),ABCC9(+2.43),ABCD4(-1.52),ABLIM1(+1.7),ABLIM3(+3.62),ABTB2(+2.14),ACADL(+2.1),ACAP1(-2.03),ACBD3(-1.69),ACBD6(+2.14),ACOT13(-1.8),ACP5(-2.76),ACRBP(-2.32),ACSBG1(-3.4),ACSL3(-1.86),ADAM12(+3.56),ADAM9(-1.69),ADAMTS10(+3.13),ADAMTS14(+3.43),ADAMTS17(+4.3),ADAMTS19(+3.87),ADAMTS20(+2.39),ADAMTS5(+2.45),ADAMTS8(+1.83),ADAMT…
Cancer,Organismal Injury and Abnormalities	Carcinoma	2.81e-87		-0.087	1855	1278	577	A2M(+4.05),ABCA12(+2.54),ABCA8(+3.17),ABCC4(-2.19),ABCC5(+1.68),ABCC8(+4.12),ABCC9(+2.43),ABCD4(-1.52),ABLIM1(+1.7),ABLIM3(+3.62),ABTB2(+2.14),ACADL(+2.1),ACAP1(-2.03),ACBD3(-1.69),ACBD6(+2.14),ACOT13(-1.8),ACP5(-2.76),ACRBP(-2.32),ACSBG1(-3.4),ACSL3(-1.86),ADAM12(+3.56),ADAM9(-1.69),ADAMTS10(+3.13),ADAMTS14(+3.43),ADAMTS17(+4.3),ADAMTS19(+3.87),ADAMTS20(+2.39),ADAMTS5(+2.45),ADAMTS8(+1.83),ADAMT…
Cancer,Organismal Injury and Abnormalities	Epithelial neoplasm	3.4e-87		-0.298	1857	1280	577	A2M(+4.05),ABCA12(+2.54),ABCA8(+3.17),ABCC4(-2.19),ABCC5(+1.68),ABCC8(+4.12),ABCC9(+2.43),ABCD4(-1.52),ABLIM1(+1.7),ABLIM3(+3.62),ABTB2(+2.14),ACADL(+2.1),ACAP1(-2.03),ACBD3(-1.69),ACBD6(+2.14),ACOT13(-1.8),ACP5(-2.76),ACRBP(-2.32),ACSBG1(-3.4),ACSL3(-1.86),ADAM12(+3.56),ADAM9(-1.69),ADAMTS10(+3.13),ADAMTS14(+3.43),ADAMTS17(+4.3),ADAMTS19(+3.87),ADAMTS20(+2.39),ADAMTS5(+2.45),ADAMTS8(+1.83),ADAMT…
Cancer,Organismal Injury and Abnormalities	Tumorigenesis of tissue	5.21e-87		0.12	1861	1282	579	A2M(+4.05),ABCA12(+2.54),ABCA8(+3.17),ABCC4(-2.19),ABCC5(+1.68),ABCC8(+4.12),ABCC9(+2.43),ABCD4(-1.52),ABLIM1(+1.7),ABLIM3(+3.62),ABTB2(+2.14),ACADL(+2.1),ACAP1(-2.03),ACBD3(-1.69),ACBD6(+2.14),ACOT13(-1.8),ACP5(-2.76),ACRBP(-2.32),ACSBG1(-3.4),ACSL3(-1.86),ADAM12(+3.56),ADAM9(-1.69),ADAMTS10(+3.13),ADAMTS14(+3.43),ADAMTS17(+4.3),ADAMTS19(+3.87),ADAMTS20(+2.39),ADAMTS5(+2.45),ADAMTS8(+1.83),ADAMT…
Cancer,Organismal Injury and Abnormalities	Non-melanoma solid tumor	5.86e-86		-0.24	1864	1285	579	A2M(+4.05),ABCA12(+2.54),ABCA8(+3.17),ABCC4(-2.19),ABCC5(+1.68),ABCC8(+4.12),ABCC9(+2.43),ABCD4(-1.52),ABLIM1(+1.7),ABLIM3(+3.62),ABTB2(+2.14),ACADL(+2.1),ACAP1(-2.03),ACBD3(-1.69),ACBD6(+2.14),ACOT13(-1.8),ACP5(-2.76),ACRBP(-2.32),ACSBG1(-3.4),ACSL3(-1.86),ADAM12(+3.56),ADAM9(-1.69),ADAMTS10(+3.13),ADAMTS14(+3.43),ADAMTS17(+4.3),ADAMTS19(+3.87),ADAMTS20(+2.39),ADAMTS5(+2.45),ADAMTS8(+1.83),ADAMT…
Cancer,Organismal Injury and Abnormalities	Nonhematologic malignant neoplasm	6.31e-86		-0.06	1870	1284	586	A2M(+4.05),ABCA12(+2.54),ABCA8(+3.17),ABCC4(-2.19),ABCC5(+1.68),ABCC8(+4.12),ABCC9(+2.43),ABCD4(-1.52),ABLIM1(+1.7),ABLIM3(+3.62),ABTB2(+2.14),ACADL(+2.1),ACAP1(-2.03),ACBD3(-1.69),ACBD6(+2.14),ACOT13(-1.8),ACP5(-2.76),ACRBP(-2.32),ACSBG1(-3.4),ACSL3(-1.86),ADAM12(+3.56),ADAM9(-1.69),ADAMTS10(+3.13),ADAMTS14(+3.43),ADAMTS17(+4.3),ADAMTS19(+3.87),ADAMTS20(+2.39),ADAMTS5(+2.45),ADAMTS8(+1.83),ADAMT…
Cancer,Organismal Injury and Abnormalities	Abdominal carcinoma	1.1e-82		-1.614	1740	1209	531	A2M(+4.05),ABCA12(+2.54),ABCA8(+3.17),ABCC4(-2.19),ABCC5(+1.68),ABCC8(+4.12),ABCC9(+2.43),ABCD4(-1.52),ABLIM1(+1.7),ABLIM3(+3.62),ABTB2(+2.14),ACAP1(-2.03),ACBD3(-1.69),ACBD6(+2.14),ACOT13(-1.8),ACP5(-2.76),ACRBP(-2.32),ACSBG1(-3.4),ACSL3(-1.86),ADAM12(+3.56),ADAM9(-1.69),ADAMTS10(+3.13),ADAMTS14(+3.43),ADAMTS17(+4.3),ADAMTS19(+3.87),ADAMTS20(+2.39),ADAMTS5(+2.45),ADAMTS8(+1.83),ADAMTSL3(+10.28),…
Cancer,Organismal Injury and Abnormalities	Adenocarcinoma	5.06e-81		-1.657	1687	1183	504	A2M(+4.05),ABCA12(+2.54),ABCA8(+3.17),ABCC4(-2.19),ABCC5(+1.68),ABCC8(+4.12),ABCC9(+2.43),ABCD4(-1.52),ABLIM1(+1.7),ABLIM3(+3.62),ABTB2(+2.14),ACAP1(-2.03),ACBD3(-1.69),ACBD6(+2.14),ACOT13(-1.8),ACP5(-2.76),ACRBP(-2.32),ACSBG1(-3.4),ACSL3(-1.86),ADAM12(+3.56),ADAM9(-1.69),ADAMTS10(+3.13),ADAMTS14(+3.43),ADAMTS17(+4.3),ADAMTS19(+3.87),ADAMTS20(+2.39),ADAMTS5(+2.45),ADAMTS8(+1.83),ADAMTSL3(+10.28),…
Cancer,Organismal Injury and Abnormalities	Abdominal cancer	5.03e-80		-0.718	1771	1229	542	A2M(+4.05),ABCA12(+2.54),ABCA8(+3.17),ABCC4(-2.19),ABCC5(+1.68),ABCC8(+4.12),ABCC9(+2.43),ABCD4(-1.52),ABLIM1(+1.7),ABLIM3(+3.62),ABTB2(+2.14),ACAP1(-2.03),ACBD3(-1.69),ACBD6(+2.14),ACOT13(-1.8),ACP5(-2.76),ACRBP(-2.32),ACSBG1(-3.4),ACSL3(-1.86),ADAM12(+3.56),ADAM9(-1.69),ADAMTS10(+3.13),ADAMTS14(+3.43),ADAMTS17(+4.3),ADAMTS19(+3.87),ADAMTS20(+2.39),ADAMTS5(+2.45),ADAMTS8(+1.83),ADAMTSL3(+10.28),…
Cancer,Organismal Injury and Abnormalities	Abdominal neoplasm	7.03e-80		0.455	1787	1238	549	A2M(+4.05),ABCA12(+2.54),ABCA8(+3.17),ABCC4(-2.19),ABCC5(+1.68),ABCC8(+4.12),ABCC9(+2.43),ABCD4(-1.52),ABLIM1(+1.7),ABLIM3(+3.62),ABTB2(+2.14),ACAP1(-2.03),ACBD3(-1.69),ACBD6(+2.14),ACOT13(-1.8),ACP5(-2.76),ACRBP(-2.32),ACSBG1(-3.4),ACSL3(-1.86),ADAM12(+3.56),ADAM9(-1.69),ADAMTS10(+3.13),ADAMTS14(+3.43),ADAMTS17(+4.3),ADAMTS19(+3.87),ADAMTS20(+2.39),ADAMTS5(+2.45),ADAMTS8(+1.83),ADAMTSL3(+10.28),…
Cancer,Organismal Injury and Abnormalities	Malignant solid tumor	1.59e-79		0.062	1883	1293	590	A2M(+4.05),ABCA12(+2.54),ABCA8(+3.17),ABCC4(-2.19),ABCC5(+1.68),ABCC8(+4.12),ABCC9(+2.43),ABCD4(-1.52),ABLIM1(+1.7),ABLIM3(+3.62),ABTB2(+2.14),ACADL(+2.1),ACAP1(-2.03),ACBD3(-1.69),ACBD6(+2.14),ACOT13(-1.8),ACP5(-2.76),ACRBP(-2.32),ACSBG1(-3.4),ACSL3(-1.86),ADAM12(+3.56),ADAM9(-1.69),ADAMTS10(+3.13),ADAMTS14(+3.43),ADAMTS17(+4.3),ADAMTS19(+3.87),ADAMTS20(+2.39),ADAMTS5(+2.45),ADAMTS8(+1.83),ADAMT…
Cancer,Organismal Injury and Abnormalities	Cancer	2.11e-78		0.769	1888	1294	594	A2M(+4.05),ABCA12(+2.54),ABCA8(+3.17),ABCC4(-2.19),ABCC5(+1.68),ABCC8(+4.12),ABCC9(+2.43),ABCD4(-1.52),ABLIM1(+1.7),ABLIM3(+3.62),ABTB2(+2.14),ACADL(+2.1),ACAP1(-2.03),ACBD3(-1.69),ACBD6(+2.14),ACOT13(-1.8),ACP5(-2.76),ACRBP(-2.32),ACSBG1(-3.4),ACSL3(-1.86),ADAM12(+3.56),ADAM9(-1.69),ADAMTS10(+3.13),ADAMTS14(+3.43),ADAMTS17(+4.3),ADAMTS19(+3.87),ADAMTS20(+2.39),ADAMTS5(+2.45),ADAMTS8(+1.83),ADAMT…
Cancer,Organismal Injury and Abnormalities	Cancer of secretory structure	1.07e-76		-1.474	1643	1138	505	A2M(+4.05),ABCA12(+2.54),ABCA8(+3.17),ABCC4(-2.19),ABCC5(+1.68),ABCC8(+4.12),ABCC9(+2.43),ABCD4(-1.52),ABLIM1(+1.7),ABTB2(+2.14),ACADL(+2.1),ACAP1(-2.03),ACBD3(-1.69),ACOT13(-1.8),ACP5(-2.76),ACRBP(-2.32),ACSBG1(-3.4),ACSL3(-1.86),ADAM12(+3.56),ADAM9(-1.69),ADAMTS10(+3.13),ADAMTS14(+3.43),ADAMTS17(+4.3),ADAMTS19(+3.87),ADAMTS20(+2.39),ADAMTS5(+2.45),ADAMTS8(+1.83),ADAMTSL3(+10.28),ADARB1(+1.73),A…
Cancer,Organismal Injury and Abnormalities	Extracranial solid tumor	1.99e-76		0.802	1878	1290	588	A2M(+4.05),ABCA12(+2.54),ABCA8(+3.17),ABCC4(-2.19),ABCC5(+1.68),ABCC8(+4.12),ABCC9(+2.43),ABCD4(-1.52),ABLIM1(+1.7),ABLIM3(+3.62),ABTB2(+2.14),ACADL(+2.1),ACAP1(-2.03),ACBD3(-1.69),ACBD6(+2.14),ACOT13(-1.8),ACP5(-2.76),ACRBP(-2.32),ACSBG1(-3.4),ACSL3(-1.86),ADAM12(+3.56),ADAM9(-1.69),ADAMTS10(+3.13),ADAMTS14(+3.43),ADAMTS17(+4.3),ADAMTS19(+3.87),ADAMTS20(+2.39),ADAMTS5(+2.45),ADAMTS8(+1.83),ADAMT…
Cancer,Organismal Injury and Abnormalities	Abdominal adenocarcinoma	5.74e-76		-1.824	1655	1160	495	A2M(+4.05),ABCA12(+2.54),ABCA8(+3.17),ABCC4(-2.19),ABCC5(+1.68),ABCC8(+4.12),ABCC9(+2.43),ABCD4(-1.52),ABLIM1(+1.7),ABLIM3(+3.62),ABTB2(+2.14),ACAP1(-2.03),ACBD3(-1.69),ACBD6(+2.14),ACOT13(-1.8),ACP5(-2.76),ACRBP(-2.32),ACSBG1(-3.4),ACSL3(-1.86),ADAM12(+3.56),ADAM9(-1.69),ADAMTS10(+3.13),ADAMTS14(+3.43),ADAMTS17(+4.3),ADAMTS19(+3.87),ADAMTS20(+2.39),ADAMTS5(+2.45),ADAMTS8(+1.83),ADAMTSL3(+10.28),…
Cancer,Organismal Injury and Abnormalities	Solid tumor	1.26e-75		0.91	1885	1294	591	A2M(+4.05),ABCA12(+2.54),ABCA8(+3.17),ABCC4(-2.19),ABCC5(+1.68),ABCC8(+4.12),ABCC9(+2.43),ABCD4(-1.52),ABLIM1(+1.7),ABLIM3(+3.62),ABTB2(+2.14),ACADL(+2.1),ACAP1(-2.03),ACBD3(-1.69),ACBD6(+2.14),ACOT13(-1.8),ACP5(-2.76),ACRBP(-2.32),ACSBG1(-3.4),ACSL3(-1.86),ADAM12(+3.56),ADAM9(-1.69),ADAMTS10(+3.13),ADAMTS14(+3.43),ADAMTS17(+4.3),ADAMTS19(+3.87),ADAMTS20(+2.39),ADAMTS5(+2.45),ADAMTS8(+1.83),ADAMT…
Cancer,Gastrointestinal Disease,Organismal Injury and Abnormalities	Digestive system cancer	1.51e-75		-0.002	1692	1189	503	A2M(+4.05),ABCA12(+2.54),ABCA8(+3.17),ABCC4(-2.19),ABCC5(+1.68),ABCC8(+4.12),ABCC9(+2.43),ABCD4(-1.52),ABLIM1(+1.7),ABLIM3(+3.62),ABTB2(+2.14),ACAP1(-2.03),ACBD3(-1.69),ACBD6(+2.14),ACOT13(-1.8),ACP5(-2.76),ACRBP(-2.32),ACSBG1(-3.4),ADAM12(+3.56),ADAM9(-1.69),ADAMTS10(+3.13),ADAMTS14(+3.43),ADAMTS17(+4.3),ADAMTS19(+3.87),ADAMTS20(+2.39),ADAMTS5(+2.45),ADAMTS8(+1.83),ADAMTSL3(+10.28),ADARB1(+1.73)…
Cancer,Gastrointestinal Disease,Organismal Injury and Abnormalities	Gastrointestinal tumor	8.13e-75		0.516	1595	1128	467	A2M(+4.05),ABCA12(+2.54),ABCA8(+3.17),ABCC4(-2.19),ABCC5(+1.68),ABCC8(+4.12),ABCC9(+2.43),ABLIM1(+1.7),ABLIM3(+3.62),ABTB2(+2.14),ACAP1(-2.03),ACBD3(-1.69),ACBD6(+2.14),ACOT13(-1.8),ACP5(-2.76),ACRBP(-2.32),ACSBG1(-3.4),ADAM12(+3.56),ADAM9(-1.69),ADAMTS10(+3.13),ADAMTS14(+3.43),ADAMTS17(+4.3),ADAMTS19(+3.87),ADAMTS20(+2.39),ADAMTS5(+2.45),ADAMTS8(+1.83),ADAMTSL3(+10.28),ADARB1(+1.73),ADARB2(+3.39…
Cancer,Gastrointestinal Disease,Organismal Injury and Abnormalities	Gastrointestinal carcinoma	1.21e-74		0.2	1547	1097	450	A2M(+4.05),ABCA12(+2.54),ABCA8(+3.17),ABCC4(-2.19),ABCC5(+1.68),ABCC8(+4.12),ABCC9(+2.43),ABLIM1(+1.7),ABLIM3(+3.62),ABTB2(+2.14),ACAP1(-2.03),ACBD3(-1.69),ACBD6(+2.14),ACOT13(-1.8),ACP5(-2.76),ACRBP(-2.32),ACSBG1(-3.4),ADAM12(+3.56),ADAM9(-1.69),ADAMTS10(+3.13),ADAMTS14(+3.43),ADAMTS17(+4.3),ADAMTS19(+3.87),ADAMTS20(+2.39),ADAMTS5(+2.45),ADAMTS8(+1.83),ADAMTSL3(+10.28),ADARB1(+1.73),ADARB2(+3.39…
Cancer,Gastrointestinal Disease,Organismal Injury and Abnormalities	Gastrointestinal tract cancer	6.67e-74		0.56	1588	1124	464	A2M(+4.05),ABCA12(+2.54),ABCA8(+3.17),ABCC4(-2.19),ABCC5(+1.68),ABCC8(+4.12),ABCC9(+2.43),ABLIM1(+1.7),ABLIM3(+3.62),ABTB2(+2.14),ACAP1(-2.03),ACBD3(-1.69),ACBD6(+2.14),ACOT13(-1.8),ACP5(-2.76),ACRBP(-2.32),ACSBG1(-3.4),ADAM12(+3.56),ADAM9(-1.69),ADAMTS10(+3.13),ADAMTS14(+3.43),ADAMTS17(+4.3),ADAMTS19(+3.87),ADAMTS20(+2.39),ADAMTS5(+2.45),ADAMTS8(+1.83),ADAMTSL3(+10.28),ADARB1(+1.73),ADARB2(+3.39…
Cancer,Gastrointestinal Disease,Organismal Injury and Abnormalities	Intestinal carcinoma	7.96e-74		-0.277	1494	1060	434	A2M(+4.05),ABCA12(+2.54),ABCA8(+3.17),ABCC4(-2.19),ABCC5(+1.68),ABCC8(+4.12),ABCC9(+2.43),ABLIM1(+1.7),ABLIM3(+3.62),ABTB2(+2.14),ACAP1(-2.03),ACBD3(-1.69),ACBD6(+2.14),ACOT13(-1.8),ACP5(-2.76),ACRBP(-2.32),ACSBG1(-3.4),ADAM12(+3.56),ADAM9(-1.69),ADAMTS10(+3.13),ADAMTS14(+3.43),ADAMTS17(+4.3),ADAMTS19(+3.87),ADAMTS20(+2.39),ADAMTS5(+2.45),ADAMTS8(+1.83),ADAMTSL3(+10.28),ADARB1(+1.73),ADARB2(+3.39…
Cancer,Gastrointestinal Disease,Organismal Injury and Abnormalities	Digestive organ tumor	9.26e-74		0.211	1712	1199	513	A2M(+4.05),ABCA12(+2.54),ABCA8(+3.17),ABCC4(-2.19),ABCC5(+1.68),ABCC8(+4.12),ABCC9(+2.43),ABCD4(-1.52),ABLIM1(+1.7),ABLIM3(+3.62),ABTB2(+2.14),ACAP1(-2.03),ACBD3(-1.69),ACBD6(+2.14),ACOT13(-1.8),ACP5(-2.76),ACRBP(-2.32),ACSBG1(-3.4),ADAM12(+3.56),ADAM9(-1.69),ADAMTS10(+3.13),ADAMTS14(+3.43),ADAMTS17(+4.3),ADAMTS19(+3.87),ADAMTS20(+2.39),ADAMTS5(+2.45),ADAMTS8(+1.83),ADAMTSL3(+10.28),ADARB1(+1.73)…
Cancer,Gastrointestinal Disease,Organismal Injury and Abnormalities	Large intestine carcinoma	1.12e-73			1493	1059	434	A2M(+4.05),ABCA12(+2.54),ABCA8(+3.17),ABCC4(-2.19),ABCC5(+1.68),ABCC8(+4.12),ABCC9(+2.43),ABLIM1(+1.7),ABLIM3(+3.62),ABTB2(+2.14),ACAP1(-2.03),ACBD3(-1.69),ACBD6(+2.14),ACOT13(-1.8),ACP5(-2.76),ACRBP(-2.32),ACSBG1(-3.4),ADAM12(+3.56),ADAM9(-1.69),ADAMTS10(+3.13),ADAMTS14(+3.43),ADAMTS17(+4.3),ADAMTS19(+3.87),ADAMTS20(+2.39),ADAMTS5(+2.45),ADAMTS8(+1.83),ADAMTSL3(+10.28),ADARB1(+1.73),ADARB2(+3.39…
Cancer,Gastrointestinal Disease,Organismal Injury and Abnormalities	Intestinal tumor	1.65e-73		0.257	1546	1093	453	A2M(+4.05),ABCA12(+2.54),ABCA8(+3.17),ABCC4(-2.19),ABCC5(+1.68),ABCC8(+4.12),ABCC9(+2.43),ABLIM1(+1.7),ABLIM3(+3.62),ABTB2(+2.14),ACAP1(-2.03),ACBD3(-1.69),ACBD6(+2.14),ACOT13(-1.8),ACP5(-2.76),ACRBP(-2.32),ACSBG1(-3.4),ADAM12(+3.56),ADAM9(-1.69),ADAMTS10(+3.13),ADAMTS14(+3.43),ADAMTS17(+4.3),ADAMTS19(+3.87),ADAMTS20(+2.39),ADAMTS5(+2.45),ADAMTS8(+1.83),ADAMTSL3(+10.28),ADARB1(+1.73),ADARB2(+3.39…
Cancer,Gastrointestinal Disease,Organismal Injury and Abnormalities	Large intestine neoplasm	5.34e-73		1.343	1544	1092	452	A2M(+4.05),ABCA12(+2.54),ABCA8(+3.17),ABCC4(-2.19),ABCC5(+1.68),ABCC8(+4.12),ABCC9(+2.43),ABLIM1(+1.7),ABLIM3(+3.62),ABTB2(+2.14),ACAP1(-2.03),ACBD3(-1.69),ACBD6(+2.14),ACOT13(-1.8),ACP5(-2.76),ACRBP(-2.32),ACSBG1(-3.4),ADAM12(+3.56),ADAM9(-1.69),ADAMTS10(+3.13),ADAMTS14(+3.43),ADAMTS17(+4.3),ADAMTS19(+3.87),ADAMTS20(+2.39),ADAMTS5(+2.45),ADAMTS8(+1.83),ADAMTSL3(+10.28),ADARB1(+1.73),ADARB2(+3.39…
Cancer,Gastrointestinal Disease,Organismal Injury and Abnormalities	Malignant neoplasm of large intestine	1.16e-72		0.786	1539	1089	450	A2M(+4.05),ABCA12(+2.54),ABCA8(+3.17),ABCC4(-2.19),ABCC5(+1.68),ABCC8(+4.12),ABCC9(+2.43),ABLIM1(+1.7),ABLIM3(+3.62),ABTB2(+2.14),ACAP1(-2.03),ACBD3(-1.69),ACBD6(+2.14),ACOT13(-1.8),ACP5(-2.76),ACRBP(-2.32),ACSBG1(-3.4),ADAM12(+3.56),ADAM9(-1.69),ADAMTS10(+3.13),ADAMTS14(+3.43),ADAMTS17(+4.3),ADAMTS19(+3.87),ADAMTS20(+2.39),ADAMTS5(+2.45),ADAMTS8(+1.83),ADAMTSL3(+10.28),ADARB1(+1.73),ADARB2(+3.39…
Cancer,Gastrointestinal Disease,Organismal Injury and Abnormalities	Intestinal adenocarcinoma	2.78e-72		-1	1483	1053	430	A2M(+4.05),ABCA12(+2.54),ABCA8(+3.17),ABCC4(-2.19),ABCC5(+1.68),ABCC8(+4.12),ABCC9(+2.43),ABLIM1(+1.7),ABLIM3(+3.62),ABTB2(+2.14),ACAP1(-2.03),ACBD3(-1.69),ACBD6(+2.14),ACOT13(-1.8),ACP5(-2.76),ACRBP(-2.32),ACSBG1(-3.4),ADAM12(+3.56),ADAM9(-1.69),ADAMTS10(+3.13),ADAMTS14(+3.43),ADAMTS17(+4.3),ADAMTS19(+3.87),ADAMTS20(+2.39),ADAMTS5(+2.45),ADAMTS8(+1.83),ADAMTSL3(+10.28),ADARB1(+1.73),ADARB2(+3.39…
Cancer,Gastrointestinal Disease,Organismal Injury and Abnormalities	Large intestine adenocarcinoma	5.6e-72			1482	1052	430	A2M(+4.05),ABCA12(+2.54),ABCA8(+3.17),ABCC4(-2.19),ABCC5(+1.68),ABCC8(+4.12),ABCC9(+2.43),ABLIM1(+1.7),ABLIM3(+3.62),ABTB2(+2.14),ACAP1(-2.03),ACBD3(-1.69),ACBD6(+2.14),ACOT13(-1.8),ACP5(-2.76),ACRBP(-2.32),ACSBG1(-3.4),ADAM12(+3.56),ADAM9(-1.69),ADAMTS10(+3.13),ADAMTS14(+3.43),ADAMTS17(+4.3),ADAMTS19(+3.87),ADAMTS20(+2.39),ADAMTS5(+2.45),ADAMTS8(+1.83),ADAMTSL3(+10.28),ADARB1(+1.73),ADARB2(+3.39…
Cancer,Gastrointestinal Disease,Organismal Injury and Abnormalities	Gastrointestinal adenocarcinoma	3.51e-71		-1.387	1503	1066	437	A2M(+4.05),ABCA12(+2.54),ABCA8(+3.17),ABCC4(-2.19),ABCC5(+1.68),ABCC8(+4.12),ABCC9(+2.43),ABLIM1(+1.7),ABLIM3(+3.62),ABTB2(+2.14),ACAP1(-2.03),ACBD3(-1.69),ACBD6(+2.14),ACOT13(-1.8),ACP5(-2.76),ACRBP(-2.32),ACSBG1(-3.4),ADAM12(+3.56),ADAM9(-1.69),ADAMTS10(+3.13),ADAMTS14(+3.43),ADAMTS17(+4.3),ADAMTS19(+3.87),ADAMTS20(+2.39),ADAMTS5(+2.45),ADAMTS8(+1.83),ADAMTSL3(+10.28),ADARB1(+1.73),ADARB2(+3.39…
Cancer,Organismal Injury and Abnormalities	Malignant genitourinary solid tumor	1.22e-70		-0.17	1359	981	378	A2M(+4.05),ABCA12(+2.54),ABCA8(+3.17),ABCC4(-2.19),ABCC5(+1.68),ABCC8(+4.12),ABCC9(+2.43),ABCD4(-1.52),ABLIM1(+1.7),ABLIM3(+3.62),ACBD3(-1.69),ACOT13(-1.8),ACP5(-2.76),ACRBP(-2.32),ACSL3(-1.86),ADAM12(+3.56),ADAM9(-1.69),ADAMTS10(+3.13),ADAMTS14(+3.43),ADAMTS19(+3.87),ADAMTS20(+2.39),ADAMTS5(+2.45),ADAMTS8(+1.83),ADAMTSL3(+10.28),ADARB2(+3.39),ADCY1(+3.35),ADCY2(-1.72),ADCY3(+1.72),ADCY8(+3.77),A…
Cancer,Organismal Injury and Abnormalities	Genitourinary tumor	1.4e-68		1.878	1372	992	380	A2M(+4.05),ABCA12(+2.54),ABCA8(+3.17),ABCC4(-2.19),ABCC5(+1.68),ABCC8(+4.12),ABCC9(+2.43),ABCD4(-1.52),ABLIM1(+1.7),ABLIM3(+3.62),ACBD3(-1.69),ACOT13(-1.8),ACP5(-2.76),ACRBP(-2.32),ACSL3(-1.86),ADAM12(+3.56),ADAM9(-1.69),ADAMTS10(+3.13),ADAMTS14(+3.43),ADAMTS19(+3.87),ADAMTS20(+2.39),ADAMTS5(+2.45),ADAMTS8(+1.83),ADAMTSL3(+10.28),ADARB1(+1.73),ADARB2(+3.39),ADCY1(+3.35),ADCY2(-1.72),ADCY3(+1.72),…
Cancer,Endocrine System Disorders,Organismal Injury and Abnormalities	Endocrine gland tumor	1.83e-68		0.015	1525	1060	465	A2M(+4.05),ABCA12(+2.54),ABCA8(+3.17),ABCC4(-2.19),ABCC5(+1.68),ABCC8(+4.12),ABCC9(+2.43),ABLIM1(+1.7),ABTB2(+2.14),ACADL(+2.1),ACAP1(-2.03),ACBD3(-1.69),ACRBP(-2.32),ACSBG1(-3.4),ACSL3(-1.86),ADAM12(+3.56),ADAM9(-1.69),ADAMTS10(+3.13),ADAMTS14(+3.43),ADAMTS17(+4.3),ADAMTS19(+3.87),ADAMTS20(+2.39),ADAMTS5(+2.45),ADAMTS8(+1.83),ADAMTSL3(+10.28),ADARB1(+1.73),ADARB2(+3.39),ADCY1(+3.35),ADCY2(-1.72)…
Cancer,Endocrine System Disorders,Organismal Injury and Abnormalities	Nonpituitary endocrine tumor	5.9e-68		-0.837	1518	1054	464	A2M(+4.05),ABCA12(+2.54),ABCA8(+3.17),ABCC4(-2.19),ABCC5(+1.68),ABCC8(+4.12),ABCC9(+2.43),ABLIM1(+1.7),ABTB2(+2.14),ACADL(+2.1),ACAP1(-2.03),ACBD3(-1.69),ACRBP(-2.32),ACSBG1(-3.4),ACSL3(-1.86),ADAM12(+3.56),ADAM9(-1.69),ADAMTS10(+3.13),ADAMTS14(+3.43),ADAMTS17(+4.3),ADAMTS19(+3.87),ADAMTS20(+2.39),ADAMTS5(+2.45),ADAMTS8(+1.83),ADAMTSL3(+10.28),ADARB1(+1.73),ADARB2(+3.39),ADCY1(+3.35),ADCY2(-1.72)…
Cancer,Organismal Injury and Abnormalities	Neck neoplasm	1.39e-67		-1.854	1518	1055	463	A2M(+4.05),ABCA12(+2.54),ABCA8(+3.17),ABCC4(-2.19),ABCC5(+1.68),ABCC8(+4.12),ABCC9(+2.43),ABLIM1(+1.7),ABLIM3(+3.62),ABTB2(+2.14),ACADL(+2.1),ACAP1(-2.03),ACBD3(-1.69),ACRBP(-2.32),ACSBG1(-3.4),ACSL3(-1.86),ADAM12(+3.56),ADAM9(-1.69),ADAMTS10(+3.13),ADAMTS14(+3.43),ADAMTS17(+4.3),ADAMTS19(+3.87),ADAMTS20(+2.39),ADAMTS5(+2.45),ADAMTS8(+1.83),ADAMTSL3(+10.28),ADARB1(+1.73),ADARB2(+3.39),ADCY1(+3.35…
Cancer,Endocrine System Disorders,Organismal Injury and Abnormalities	Endocrine cancer	3.51e-67		-0.513	1508	1047	461	A2M(+4.05),ABCA12(+2.54),ABCA8(+3.17),ABCC4(-2.19),ABCC5(+1.68),ABCC8(+4.12),ABCC9(+2.43),ABLIM1(+1.7),ABTB2(+2.14),ACADL(+2.1),ACAP1(-2.03),ACBD3(-1.69),ACRBP(-2.32),ACSBG1(-3.4),ACSL3(-1.86),ADAM12(+3.56),ADAM9(-1.69),ADAMTS10(+3.13),ADAMTS14(+3.43),ADAMTS17(+4.3),ADAMTS19(+3.87),ADAMTS20(+2.39),ADAMTS5(+2.45),ADAMTS8(+1.83),ADAMTSL3(+10.28),ADARB1(+1.73),ADARB2(+3.39),ADCY1(+3.35),ADCY2(-1.72)…
Cancer,Organismal Injury and Abnormalities	Head and neck tumor	1.33e-66		0.194	1576	1103	473	A2M(+4.05),ABCA12(+2.54),ABCA8(+3.17),ABCC4(-2.19),ABCC5(+1.68),ABCC8(+4.12),ABCC9(+2.43),ABLIM1(+1.7),ABLIM3(+3.62),ABTB2(+2.14),ACADL(+2.1),ACAP1(-2.03),ACBD3(-1.69),ACRBP(-2.32),ACSBG1(-3.4),ACSL3(-1.86),ADAM12(+3.56),ADAM9(-1.69),ADAMTS10(+3.13),ADAMTS14(+3.43),ADAMTS17(+4.3),ADAMTS19(+3.87),ADAMTS20(+2.39),ADAMTS5(+2.45),ADAMTS8(+1.83),ADAMTSL3(+10.28),ADARB1(+1.73),ADARB2(+3.39),ADCY1(+3.35…
Cancer,Organismal Injury and Abnormalities	Head and neck cancer	2.08e-66		-0.412	1563	1092	471	A2M(+4.05),ABCA12(+2.54),ABCA8(+3.17),ABCC4(-2.19),ABCC5(+1.68),ABCC8(+4.12),ABCC9(+2.43),ABLIM1(+1.7),ABLIM3(+3.62),ABTB2(+2.14),ACADL(+2.1),ACAP1(-2.03),ACBD3(-1.69),ACRBP(-2.32),ACSBG1(-3.4),ACSL3(-1.86),ADAM12(+3.56),ADAM9(-1.69),ADAMTS10(+3.13),ADAMTS14(+3.43),ADAMTS17(+4.3),ADAMTS19(+3.87),ADAMTS20(+2.39),ADAMTS5(+2.45),ADAMTS8(+1.83),ADAMTSL3(+10.28),ADARB1(+1.73),ADARB2(+3.39),ADCY1(+3.35…
Cancer,Endocrine System Disorders,Organismal Injury and Abnormalities	Endocrine carcinoma	2.67e-66		-0.863	1504	1044	460	A2M(+4.05),ABCA12(+2.54),ABCA8(+3.17),ABCC4(-2.19),ABCC5(+1.68),ABCC8(+4.12),ABCC9(+2.43),ABLIM1(+1.7),ABTB2(+2.14),ACADL(+2.1),ACAP1(-2.03),ACBD3(-1.69),ACRBP(-2.32),ACSBG1(-3.4),ACSL3(-1.86),ADAM12(+3.56),ADAM9(-1.69),ADAMTS10(+3.13),ADAMTS14(+3.43),ADAMTS17(+4.3),ADAMTS19(+3.87),ADAMTS20(+2.39),ADAMTS5(+2.45),ADAMTS8(+1.83),ADAMTSL3(+10.28),ADARB1(+1.73),ADARB2(+3.39),ADCY1(+3.35),ADCY2(-1.72)…
Cancer,Endocrine System Disorders,Organismal Injury and Abnormalities	Thyroid cancer	4.35e-66		-1.432	1501	1041	460	A2M(+4.05),ABCA12(+2.54),ABCA8(+3.17),ABCC4(-2.19),ABCC5(+1.68),ABCC8(+4.12),ABCC9(+2.43),ABLIM1(+1.7),ABTB2(+2.14),ACADL(+2.1),ACAP1(-2.03),ACBD3(-1.69),ACRBP(-2.32),ACSBG1(-3.4),ACSL3(-1.86),ADAM12(+3.56),ADAM9(-1.69),ADAMTS10(+3.13),ADAMTS14(+3.43),ADAMTS17(+4.3),ADAMTS19(+3.87),ADAMTS20(+2.39),ADAMTS5(+2.45),ADAMTS8(+1.83),ADAMTSL3(+10.28),ADARB1(+1.73),ADARB2(+3.39),ADCY1(+3.35),ADCY2(-1.72)…
Cancer,Endocrine System Disorders,Organismal Injury and Abnormalities	Thyroid carcinoma	7.77e-66		-1.432	1499	1040	459	A2M(+4.05),ABCA12(+2.54),ABCA8(+3.17),ABCC4(-2.19),ABCC5(+1.68),ABCC8(+4.12),ABCC9(+2.43),ABLIM1(+1.7),ABTB2(+2.14),ACADL(+2.1),ACAP1(-2.03),ACBD3(-1.69),ACRBP(-2.32),ACSBG1(-3.4),ACSL3(-1.86),ADAM12(+3.56),ADAM9(-1.69),ADAMTS10(+3.13),ADAMTS14(+3.43),ADAMTS17(+4.3),ADAMTS19(+3.87),ADAMTS20(+2.39),ADAMTS5(+2.45),ADAMTS8(+1.83),ADAMTSL3(+10.28),ADARB1(+1.73),ADARB2(+3.39),ADCY1(+3.35),ADCY2(-1.72)…
Cancer,Endocrine System Disorders,Organismal Injury and Abnormalities	Thyroid gland tumor	1.58e-65		-1.854	1502	1042	460	A2M(+4.05),ABCA12(+2.54),ABCA8(+3.17),ABCC4(-2.19),ABCC5(+1.68),ABCC8(+4.12),ABCC9(+2.43),ABLIM1(+1.7),ABTB2(+2.14),ACADL(+2.1),ACAP1(-2.03),ACBD3(-1.69),ACRBP(-2.32),ACSBG1(-3.4),ACSL3(-1.86),ADAM12(+3.56),ADAM9(-1.69),ADAMTS10(+3.13),ADAMTS14(+3.43),ADAMTS17(+4.3),ADAMTS19(+3.87),ADAMTS20(+2.39),ADAMTS5(+2.45),ADAMTS8(+1.83),ADAMTSL3(+10.28),ADARB1(+1.73),ADARB2(+3.39),ADCY1(+3.35),ADCY2(-1.72)…
Cancer,Organismal Injury and Abnormalities	Head and neck carcinoma	8.17e-65		0	1553	1084	469	A2M(+4.05),ABCA12(+2.54),ABCA8(+3.17),ABCC4(-2.19),ABCC5(+1.68),ABCC8(+4.12),ABCC9(+2.43),ABLIM1(+1.7),ABLIM3(+3.62),ABTB2(+2.14),ACADL(+2.1),ACAP1(-2.03),ACBD3(-1.69),ACRBP(-2.32),ACSBG1(-3.4),ACSL3(-1.86),ADAM12(+3.56),ADAM9(-1.69),ADAMTS10(+3.13),ADAMTS14(+3.43),ADAMTS17(+4.3),ADAMTS19(+3.87),ADAMTS20(+2.39),ADAMTS5(+2.45),ADAMTS8(+1.83),ADAMTSL3(+10.28),ADARB1(+1.73),ADARB2(+3.39),ADCY1(+3.35…
Cancer,Organismal Injury and Abnormalities	Frequency of tumor	8.03e-64		-1.103	1338	972	366	A2M(+4.05),ABCA12(+2.54),ABCA8(+3.17),ABCC4(-2.19),ABCC5(+1.68),ABCC8(+4.12),ABCC9(+2.43),ABCD4(-1.52),ABLIM3(+3.62),ACBD3(-1.69),ACBD6(+2.14),ACP5(-2.76),ACRBP(-2.32),ACSL3(-1.86),ADAM12(+3.56),ADAM9(-1.69),ADAMTS10(+3.13),ADAMTS14(+3.43),ADAMTS19(+3.87),ADAMTS20(+2.39),ADAMTS5(+2.45),ADAMTS8(+1.83),ADAMTSL3(+10.28),ADARB1(+1.73),ADARB2(+3.39),ADCY1(+3.35),ADCY2(-1.72),ADCY3(+1.72),ADCY8(+3.77),…
Cancer,Organismal Injury and Abnormalities	Incidence of tumor	6.66e-63		-1.008	1367	993	374	A2M(+4.05),ABCA12(+2.54),ABCA8(+3.17),ABCC4(-2.19),ABCC5(+1.68),ABCC8(+4.12),ABCC9(+2.43),ABCD4(-1.52),ABLIM3(+3.62),ACBD3(-1.69),ACBD6(+2.14),ACP5(-2.76),ACRBP(-2.32),ACSL3(-1.86),ADAM12(+3.56),ADAM9(-1.69),ADAMTS10(+3.13),ADAMTS14(+3.43),ADAMTS19(+3.87),ADAMTS20(+2.39),ADAMTS5(+2.45),ADAMTS8(+1.83),ADAMTSL3(+10.28),ADARB1(+1.73),ADARB2(+3.39),ADCY1(+3.35),ADCY2(-1.72),ADCY3(+1.72),ADCY8(+3.77),…
Cancer,Organismal Injury and Abnormalities	Development of malignant tumor	2.95e-62		-1.4	1317	958	359	A2M(+4.05),ABCA12(+2.54),ABCA8(+3.17),ABCC4(-2.19),ABCC5(+1.68),ABCC8(+4.12),ABCC9(+2.43),ABCD4(-1.52),ABLIM3(+3.62),ACBD3(-1.69),ACBD6(+2.14),ACP5(-2.76),ACRBP(-2.32),ACSL3(-1.86),ADAM12(+3.56),ADAM9(-1.69),ADAMTS10(+3.13),ADAMTS14(+3.43),ADAMTS19(+3.87),ADAMTS20(+2.39),ADAMTS5(+2.45),ADAMTS8(+1.83),ADAMTSL3(+10.28),ADARB1(+1.73),ADARB2(+3.39),ADCY1(+3.35),ADCY2(-1.72),ADCY3(+1.72),ADCY8(+3.77),…
Cancer,Organismal Injury and Abnormalities	Tumorigenesis of epithelial neoplasm	2.46e-61		-1.177	1316	958	358	A2M(+4.05),ABCA12(+2.54),ABCA8(+3.17),ABCC4(-2.19),ABCC5(+1.68),ABCC8(+4.12),ABCC9(+2.43),ABCD4(-1.52),ABLIM3(+3.62),ACBD3(-1.69),ACBD6(+2.14),ACP5(-2.76),ACRBP(-2.32),ACSL3(-1.86),ADAM9(-1.69),ADAMTS10(+3.13),ADAMTS14(+3.43),ADAMTS19(+3.87),ADAMTS20(+2.39),ADAMTS8(+1.83),ADAMTSL3(+10.28),ADARB1(+1.73),ADARB2(+3.39),ADCY1(+3.35),ADCY2(-1.72),ADCY3(+1.72),ADCY8(+3.77),ADCYAP1R1(+5.81),ADD2(+2.03),…
Cancer,Organismal Injury and Abnormalities	Anogenital cancer	3.38e-60		0.134	1262	929	333	A2M(+4.05),ABCA12(+2.54),ABCA8(+3.17),ABCC4(-2.19),ABCC5(+1.68),ABCC8(+4.12),ABCC9(+2.43),ABCD4(-1.52),ABLIM1(+1.7),ABLIM3(+3.62),ACBD3(-1.69),ACOT13(-1.8),ACP5(-2.76),ACRBP(-2.32),ACSL3(-1.86),ADAM12(+3.56),ADAM9(-1.69),ADAMTS10(+3.13),ADAMTS14(+3.43),ADAMTS19(+3.87),ADAMTS20(+2.39),ADAMTS5(+2.45),ADAMTS8(+1.83),ADAMTSL3(+10.28),ADARB2(+3.39),ADCY1(+3.35),ADCY2(-1.72),ADCY3(+1.72),ADCY8(+3.77),A…
Cancer,Organismal Injury and Abnormalities	Development of carcinoma	4.25e-60		-0.865	1299	947	352	A2M(+4.05),ABCA12(+2.54),ABCA8(+3.17),ABCC4(-2.19),ABCC5(+1.68),ABCC8(+4.12),ABCC9(+2.43),ABCD4(-1.52),ABLIM3(+3.62),ACBD3(-1.69),ACBD6(+2.14),ACP5(-2.76),ACRBP(-2.32),ACSL3(-1.86),ADAM9(-1.69),ADAMTS10(+3.13),ADAMTS14(+3.43),ADAMTS19(+3.87),ADAMTS20(+2.39),ADAMTS8(+1.83),ADAMTSL3(+10.28),ADARB1(+1.73),ADARB2(+3.39),ADCY1(+3.35),ADCY2(-1.72),ADCY3(+1.72),ADCY8(+3.77),ADCYAP1R1(+5.81),ADD2(+2.03),…
Cancer,Organismal Injury and Abnormalities	Pelvic tumor	1.04e-58		0.696	1229	902	327	A2M(+4.05),ABCA12(+2.54),ABCA8(+3.17),ABCC4(-2.19),ABCC5(+1.68),ABCC8(+4.12),ABCC9(+2.43),ABCD4(-1.52),ABLIM3(+3.62),ACOT13(-1.8),ACP5(-2.76),ACRBP(-2.32),ACSL3(-1.86),ADAM12(+3.56),ADAM9(-1.69),ADAMTS10(+3.13),ADAMTS14(+3.43),ADAMTS19(+3.87),ADAMTS20(+2.39),ADAMTS5(+2.45),ADAMTSL3(+10.28),ADARB1(+1.73),ADARB2(+3.39),ADCY1(+3.35),ADCY2(-1.72),ADCY8(+3.77),ADCYAP1(+4.25),ADCYAP1R1(+5.81),ADD2(+2.0…
Cancer,Organismal Injury and Abnormalities	Pelvic cancer	1.57e-58		-0.896	1214	890	324	A2M(+4.05),ABCA12(+2.54),ABCA8(+3.17),ABCC4(-2.19),ABCC5(+1.68),ABCC8(+4.12),ABCC9(+2.43),ABCD4(-1.52),ABLIM3(+3.62),ACOT13(-1.8),ACP5(-2.76),ACRBP(-2.32),ACSL3(-1.86),ADAM9(-1.69),ADAMTS10(+3.13),ADAMTS14(+3.43),ADAMTS19(+3.87),ADAMTS20(+2.39),ADAMTS5(+2.45),ADAMTSL3(+10.28),ADARB2(+3.39),ADCY1(+3.35),ADCY2(-1.72),ADCY8(+3.77),ADCYAP1(+4.25),ADCYAP1R1(+5.81),ADD2(+2.03),ADGRD1(-2.98),ADGRG1(-1.6…
Dermatological Diseases and Conditions,Organismal Injury and Abnormalities	Skin lesion	1.3e-57		0.093	1210	915	295	A2M(+4.05),ABCA12(+2.54),ABCA8(+3.17),ABCC4(-2.19),ABCC8(+4.12),ABCC9(+2.43),ABCD4(-1.52),ABLIM3(+3.62),ABTB2(+2.14),ACADL(+2.1),ACAP1(-2.03),ACBD3(-1.69),ACP5(-2.76),ACRBP(-2.32),ACSBG1(-3.4),ACSL3(-1.86),ADAM12(+3.56),ADAM9(-1.69),ADAMTS10(+3.13),ADAMTS14(+3.43),ADAMTS17(+4.3),ADAMTS19(+3.87),ADAMTS20(+2.39),ADAMTS5(+2.45),ADAMTS8(+1.83),ADAMTSL3(+10.28),ADARB1(+1.73),ADARB2(+3.39),ADCY1(+3.35)…
Cancer,Dermatological Diseases and Conditions,Organismal Injury and Abnormalities	Skin tumor	8.9e-56		1.339	1198	908	290	A2M(+4.05),ABCA12(+2.54),ABCA8(+3.17),ABCC4(-2.19),ABCC8(+4.12),ABCC9(+2.43),ABCD4(-1.52),ABLIM3(+3.62),ABTB2(+2.14),ACADL(+2.1),ACAP1(-2.03),ACBD3(-1.69),ACP5(-2.76),ACRBP(-2.32),ACSBG1(-3.4),ACSL3(-1.86),ADAM12(+3.56),ADAM9(-1.69),ADAMTS10(+3.13),ADAMTS14(+3.43),ADAMTS17(+4.3),ADAMTS19(+3.87),ADAMTS20(+2.39),ADAMTS5(+2.45),ADAMTS8(+1.83),ADAMTSL3(+10.28),ADARB1(+1.73),ADARB2(+3.39),ADCY1(+3.35)…
Cancer,Organismal Injury and Abnormalities	Genitourinary carcinoma	1.86e-55		-0.466	1180	865	315	A2M(+4.05),ABCA12(+2.54),ABCA8(+3.17),ABCC4(-2.19),ABCC5(+1.68),ABCC8(+4.12),ABCC9(+2.43),ABCD4(-1.52),ABLIM3(+3.62),ACP5(-2.76),ACSL3(-1.86),ADAM9(-1.69),ADAMTS10(+3.13),ADAMTS14(+3.43),ADAMTS19(+3.87),ADAMTS20(+2.39),ADAMTS5(+2.45),ADAMTSL3(+10.28),ADARB2(+3.39),ADCY1(+3.35),ADCY2(-1.72),ADCY8(+3.77),ADCYAP1(+4.25),ADCYAP1R1(+5.81),ADD2(+2.03),ADGRG1(-1.62),AFAP1(+2.7),AFF2(+2.21),AFF3(+1.85),A…
Cancer,Dermatological Diseases and Conditions,Organismal Injury and Abnormalities	Skin cancer	4.48e-54		1.638	1188	902	286	A2M(+4.05),ABCA12(+2.54),ABCA8(+3.17),ABCC4(-2.19),ABCC8(+4.12),ABCC9(+2.43),ABCD4(-1.52),ABLIM3(+3.62),ABTB2(+2.14),ACADL(+2.1),ACAP1(-2.03),ACBD3(-1.69),ACP5(-2.76),ACRBP(-2.32),ACSBG1(-3.4),ACSL3(-1.86),ADAM12(+3.56),ADAM9(-1.69),ADAMTS10(+3.13),ADAMTS14(+3.43),ADAMTS17(+4.3),ADAMTS19(+3.87),ADAMTS20(+2.39),ADAMTS5(+2.45),ADAMTS8(+1.83),ADAMTSL3(+10.28),ADARB1(+1.73),ADARB2(+3.39),ADCY1(+3.35)…
Cancer,Organismal Injury and Abnormalities,Reproductive System Disease	Genital tumor	1.45e-53		1.267	1156	863	293	A2M(+4.05),ABCA12(+2.54),ABCA8(+3.17),ABCC4(-2.19),ABCC5(+1.68),ABCC8(+4.12),ABCC9(+2.43),ABCD4(-1.52),ABLIM3(+3.62),ACOT13(-1.8),ACP5(-2.76),ACRBP(-2.32),ACSL3(-1.86),ADAM12(+3.56),ADAM9(-1.69),ADAMTS10(+3.13),ADAMTS14(+3.43),ADAMTS19(+3.87),ADAMTS20(+2.39),ADAMTS5(+2.45),ADAMTSL3(+10.28),ADARB1(+1.73),ADARB2(+3.39),ADCY1(+3.35),ADCY2(-1.72),ADCY8(+3.77),ADCYAP1(+4.25),ADCYAP1R1(+5.81),ADD2(+2.0…
Cancer,Organismal Injury and Abnormalities	Melanoma	4.71e-53		0.577	1285	961	324	A2M(+4.05),ABCA12(+2.54),ABCA8(+3.17),ABCC4(-2.19),ABCC8(+4.12),ABCC9(+2.43),ABCD4(-1.52),ABLIM3(+3.62),ABTB2(+2.14),ACADL(+2.1),ACAP1(-2.03),ACBD3(-1.69),ACP5(-2.76),ACRBP(-2.32),ACSBG1(-3.4),ACSL3(-1.86),ADAM9(-1.69),ADAMTS10(+3.13),ADAMTS14(+3.43),ADAMTS17(+4.3),ADAMTS19(+3.87),ADAMTS20(+2.39),ADAMTS5(+2.45),ADAMTS8(+1.83),ADAMTSL3(+10.28),ADARB1(+1.73),ADARB2(+3.39),ADCY1(+3.35),ADCY3(+1.72),…
Cancer,Organismal Injury and Abnormalities,Reproductive System Disease	Genital tract cancer	2.41e-52		-0.674	1137	848	289	A2M(+4.05),ABCA12(+2.54),ABCA8(+3.17),ABCC4(-2.19),ABCC5(+1.68),ABCC8(+4.12),ABCC9(+2.43),ABCD4(-1.52),ABLIM3(+3.62),ACOT13(-1.8),ACP5(-2.76),ACRBP(-2.32),ACSL3(-1.86),ADAM9(-1.69),ADAMTS10(+3.13),ADAMTS14(+3.43),ADAMTS19(+3.87),ADAMTS20(+2.39),ADAMTS5(+2.45),ADAMTSL3(+10.28),ADARB2(+3.39),ADCY1(+3.35),ADCY2(-1.72),ADCY8(+3.77),ADCYAP1(+4.25),ADCYAP1R1(+5.81),ADD2(+2.03),ADGRD1(-2.98),ADGRG1(-1.6…
Cancer,Dermatological Diseases and Conditions,Organismal Injury and Abnormalities	Cutaneous melanoma	2.93e-52		1.064	1138	868	270	A2M(+4.05),ABCA12(+2.54),ABCA8(+3.17),ABCC4(-2.19),ABCC8(+4.12),ABCC9(+2.43),ABCD4(-1.52),ABLIM3(+3.62),ABTB2(+2.14),ACADL(+2.1),ACAP1(-2.03),ACBD3(-1.69),ACP5(-2.76),ACRBP(-2.32),ACSBG1(-3.4),ACSL3(-1.86),ADAM9(-1.69),ADAMTS10(+3.13),ADAMTS14(+3.43),ADAMTS17(+4.3),ADAMTS19(+3.87),ADAMTS20(+2.39),ADAMTS5(+2.45),ADAMTS8(+1.83),ADAMTSL3(+10.28),ADARB1(+1.73),ADARB2(+3.39),ADCY1(+3.35),ADCY3(+1.72),…
Cancer,Organismal Injury and Abnormalities	Breast or colorectal cancer	6.04e-49		1.11	1103	813	290	ABCA12(+2.54),ABCA8(+3.17),ABCC4(-2.19),ABCC5(+1.68),ABCC8(+4.12),ABCC9(+2.43),ABLIM1(+1.7),ABLIM3(+3.62),ACBD3(-1.69),ACBD6(+2.14),ACP5(-2.76),ACRBP(-2.32),ADAM12(+3.56),ADAM9(-1.69),ADAMTS10(+3.13),ADAMTS14(+3.43),ADAMTS20(+2.39),ADAMTS5(+2.45),ADAMTS8(+1.83),ADARB1(+1.73),ADARB2(+3.39),ADCY2(-1.72),ADCY3(+1.72),ADCY8(+3.77),ADCYAP1(+4.25),ADD2(+2.03),ADGRD1(-2.98),ADIPOR1(-1.58),AFAP1(+2.7),AF…
Cancer,Organismal Injury and Abnormalities	Breast or pancreatic cancer	1.21e-48		-0.161	926	697	229	ABCA12(+2.54),ABCA8(+3.17),ABCC4(-2.19),ABCC5(+1.68),ABCC8(+4.12),ABCC9(+2.43),ABCD4(-1.52),ABLIM1(+1.7),ABLIM3(+3.62),ABTB2(+2.14),ACAP1(-2.03),ACBD3(-1.69),ACP5(-2.76),ACRBP(-2.32),ADAM12(+3.56),ADAM9(-1.69),ADAMTS10(+3.13),ADAMTS14(+3.43),ADAMTS17(+4.3),ADAMTS19(+3.87),ADAMTS20(+2.39),ADAMTS5(+2.45),ADAMTS8(+1.83),ADAMTSL3(+10.28),ADARB2(+3.39),ADCY1(+3.35),ADCY2(-1.72),ADCY3(+1.72),ADCY8(+3.7…
Cancer,Organismal Injury and Abnormalities,Reproductive System Disease	Breast or gynecological cancer	1.32e-48		0.301	1014	762	252	ABCA12(+2.54),ABCA8(+3.17),ABCC4(-2.19),ABCC5(+1.68),ABCC8(+4.12),ABCC9(+2.43),ABCD4(-1.52),ABLIM1(+1.7),ABLIM3(+3.62),ACBD3(-1.69),ACP5(-2.76),ACRBP(-2.32),ACSL3(-1.86),ADAM12(+3.56),ADAM9(-1.69),ADAMTS10(+3.13),ADAMTS14(+3.43),ADAMTS19(+3.87),ADAMTS20(+2.39),ADAMTS5(+2.45),ADAMTS8(+1.83),ADAMTSL3(+10.28),ADARB2(+3.39),ADCY1(+3.35),ADCY2(-1.72),ADCY3(+1.72),ADCYAP1(+4.25),ADCYAP1R1(+5.81),ADD2(+…
Cancer,Organismal Injury and Abnormalities	Genitourinary adenocarcinoma	6.81e-46			1046	777	269	A2M(+4.05),ABCA12(+2.54),ABCA8(+3.17),ABCC4(-2.19),ABCC5(+1.68),ABCC8(+4.12),ABCC9(+2.43),ABCD4(-1.52),ABLIM3(+3.62),ACP5(-2.76),ACSL3(-1.86),ADAM9(-1.69),ADAMTS10(+3.13),ADAMTS14(+3.43),ADAMTS19(+3.87),ADAMTS20(+2.39),ADAMTS5(+2.45),ADAMTSL3(+10.28),ADARB2(+3.39),ADCY1(+3.35),ADCY2(-1.72),ADCY8(+3.77),ADCYAP1(+4.25),ADCYAP1R1(+5.81),ADD2(+2.03),AFF2(+2.21),AFF3(+1.85),AGER(-1.91),AIF1(-4.76),AJA…
Embryonic Development,Organismal Development	Development of head	1.07e-43	Increased	3.323	304	237	67	ADAM9(-1.69),ADCY1(+3.35),ADCY3(+1.72),ADCYAP1(+4.25),ADCYAP1R1(+5.81),ADGRB1(+2.1),ADGRG1(-1.62),AFF2(+2.21),AGPAT3(+1.58),ALDH1A3(+3.21),ALK(+3.89),ALOX15(-2.39),AQP1(+2.14),ARSB(+1.72),ARX(-5.71),ASCL1(+5.3),ASPM(+2.11),ASPN(+14.68),ATP1B1(-2.11),ATP1B2(-1.79),ATP8A2(+2.14),AXIN2(+3.19),AXL(-1.57),BARHL1(+2.44),BCL11B(+4.28),BHLHE22(+5.15),BMP4(+1.85),BMP5(+3.06),BMPER(+5.67),BMPR1B(-2.97),BNC…
Organismal Development	Morphology of head	1.3e-43			305	233	72	ABCA12(+2.54),ADAM9(-1.69),ADCY1(+3.35),ADCY3(+1.72),ADCYAP1(+4.25),AGPAT3(+1.58),AHR(+3.68),AKAP6(+1.88),ALDH1A3(+3.21),ALK(+3.89),ANKH(+1.95),AQP1(+2.14),ARSB(+1.72),ARX(-5.71),ASCL1(+5.3),ASPM(+2.11),ATP1B2(-1.79),ATP8A2(+2.14),AXIN2(+3.19),AXL(-1.57),B4GALNT1(+3.19),BCL11B(+4.28),BHLHE22(+5.15),BMP1(+1.86),BMP4(+1.85),BMPER(+5.67),BMPR1B(-2.97),BOC(+1.7),BRINP1(+3.57),BRSK1(-1.69),BRSK2(+2.27…
Cancer,Gastrointestinal Disease,Organismal Injury and Abnormalities	Development of digestive organ tumor	3.29e-43		-1.028	945	704	241	A2M(+4.05),ABCA12(+2.54),ABCA8(+3.17),ABCC4(-2.19),ABCC5(+1.68),ABCC8(+4.12),ABCC9(+2.43),ABLIM3(+3.62),ACBD3(-1.69),ACBD6(+2.14),ACP5(-2.76),ACRBP(-2.32),ADAM9(-1.69),ADAMTS10(+3.13),ADAMTS14(+3.43),ADAMTS20(+2.39),ADAMTS8(+1.83),ADARB1(+1.73),ADCY2(-1.72),ADCY3(+1.72),ADCY8(+3.77),ADD2(+2.03),ADIPOR1(-1.58),AFAP1(+2.7),AFF2(+2.21),AFF3(+1.85),AHR(+3.68),AJAP1(+2.43),AK5(+2.51),AKAP2(+2.04),AKAP…
Cancer,Organismal Injury and Abnormalities	Development of adenocarcinoma	6.37e-43		-1.395	870	663	207	ABCA12(+2.54),ABCA8(+3.17),ABCC4(-2.19),ABCC5(+1.68),ABCC8(+4.12),ABCC9(+2.43),ABCD4(-1.52),ABLIM3(+3.62),ACP5(-2.76),ACSL3(-1.86),ADAM9(-1.69),ADAMTS10(+3.13),ADAMTS14(+3.43),ADAMTS19(+3.87),ADAMTS20(+2.39),ADAMTSL3(+10.28),ADCY1(+3.35),ADCY2(-1.72),ADCYAP1R1(+5.81),ADD2(+2.03),AFF2(+2.21),AFF3(+1.85),AGER(-1.91),AHR(+3.68),AIF1(-4.76),AJAP1(+2.43),AKAP2(+2.04),AKAP6(+1.88),ALDH1A3(+3.21),ALDOA(…
Embryonic Development,Organismal Development	Development of body axis	9.43e-43	Increased	3.323	316	247	69	ADAM9(-1.69),ADCY1(+3.35),ADCY3(+1.72),ADCYAP1(+4.25),ADCYAP1R1(+5.81),ADGRB1(+2.1),ADGRG1(-1.62),AFF2(+2.21),AGPAT3(+1.58),ALDH1A3(+3.21),ALK(+3.89),ALOX15(-2.39),AQP1(+2.14),ARSB(+1.72),ARX(-5.71),ASCL1(+5.3),ASPM(+2.11),ASPN(+14.68),ATP1B1(-2.11),ATP1B2(-1.79),ATP8A2(+2.14),AXIN2(+3.19),AXL(-1.57),BARHL1(+2.44),BCL11B(+4.28),BHLHE22(+5.15),BMP4(+1.85),BMP5(+3.06),BMPER(+5.67),BMPR1B(-2.97),BMP…
Cancer,Gastrointestinal Disease,Hepatic System Disease,Organismal Injury and Abnormalities	Liver carcinoma	4.82e-42		-0.605	832	631	201	ABCA12(+2.54),ABCA8(+3.17),ABCC4(-2.19),ABCC5(+1.68),ABCC8(+4.12),ABCC9(+2.43),ABLIM1(+1.7),ABLIM3(+3.62),ACBD3(-1.69),ACRBP(-2.32),ADAM12(+3.56),ADAM9(-1.69),ADAMTS10(+3.13),ADAMTS17(+4.3),ADAMTS19(+3.87),ADAMTS20(+2.39),ADAMTS5(+2.45),ADAMTSL3(+10.28),ADARB1(+1.73),ADARB2(+3.39),ADCY1(+3.35),ADCY2(-1.72),ADCY8(+3.77),ADCYAP1(+4.25),ADGRG1(-1.62),ADIPOR1(-1.58),AFF2(+2.21),AFF3(+1.85),AGER(-1.91…
Cancer,Gastrointestinal Disease,Organismal Injury and Abnormalities	Upper gastrointestinal tract tumor	3.49e-41		0.581	620	488	132	A2M(+4.05),ABCA12(+2.54),ABCA8(+3.17),ABCC4(-2.19),ABCC5(+1.68),ABCC8(+4.12),ABCC9(+2.43),ADAM12(+3.56),ADAM9(-1.69),ADAMTS10(+3.13),ADAMTS17(+4.3),ADAMTSL3(+10.28),ADARB1(+1.73),ADCY2(-1.72),ADCY8(+3.77),AFAP1-AS1(+1.93),AFF2(+2.21),AHR(+3.68),AJAP1(+2.43),AKAP2(+2.04),AKAP6(+1.88),ALCAM(+3.09),ALK(+3.89),AMT(-1.62),ANGPT1(+5.6),ANKRD26(-1.77),ANKRD50(+1.66),ANKS1B(+2.02),ANO1(+5.01),APBA1(+2.1)…
Organismal Development,Organismal Injury and Abnormalities	Abnormal morphology of head	4.59e-41			276	209	67	ABCA12(+2.54),ADAM9(-1.69),ADCY1(+3.35),ADCY3(+1.72),ADCYAP1(+4.25),AHR(+3.68),AKAP6(+1.88),ALDH1A3(+3.21),ALK(+3.89),ANKH(+1.95),ARSB(+1.72),ARX(-5.71),ASCL1(+5.3),ASPM(+2.11),ATP1B2(-1.79),ATP8A2(+2.14),AXIN2(+3.19),AXL(-1.57),B4GALNT1(+3.19),BCL11B(+4.28),BHLHE22(+5.15),BMP1(+1.86),BMP4(+1.85),BMPER(+5.67),BMPR1B(-2.97),BOC(+1.7),BRINP1(+3.57),BRSK1(-1.69),BRSK2(+2.27),CACNA1F(-3.83),CBLN1(+5.…
Gastrointestinal Disease,Organismal Injury and Abnormalities	Colorectal disorder	6.82e-41		0.958	957	713	244	ABCA12(+2.54),ABCA8(+3.17),ABCC4(-2.19),ABCC5(+1.68),ABCC8(+4.12),ABLIM3(+3.62),ACBD3(-1.69),ACBD6(+2.14),ACP5(-2.76),ACRBP(-2.32),ADAM12(+3.56),ADAM9(-1.69),ADAMTS10(+3.13),ADAMTS14(+3.43),ADAMTS20(+2.39),ADAMTS8(+1.83),ADARB1(+1.73),ADCY2(-1.72),ADCY3(+1.72),ADCY8(+3.77),ADD2(+2.03),ADGRD1(-2.98),ADIPOR1(-1.58),AFAP1(+2.7),AFF2(+2.21),AFF3(+1.85),AHR(+3.68),AJAP1(+2.43),AK5(+2.51),AKAP2(+2.04),…
Cancer,Organismal Injury and Abnormalities,Reproductive System Disease	Female genital neoplasm	1.27e-40		-0.207	844	654	190	ABCA12(+2.54),ABCA8(+3.17),ABCC4(-2.19),ABCC8(+4.12),ABCC9(+2.43),ABCD4(-1.52),ABLIM3(+3.62),ACP5(-2.76),ACRBP(-2.32),ACSL3(-1.86),ADAM12(+3.56),ADAM9(-1.69),ADAMTS10(+3.13),ADAMTS19(+3.87),ADAMTS20(+2.39),ADAMTS5(+2.45),ADAMTSL3(+10.28),ADARB1(+1.73),ADARB2(+3.39),ADCY1(+3.35),ADCY2(-1.72),ADCYAP1R1(+5.81),ADD2(+2.03),AFF2(+2.21),AFF3(+1.85),AHR(+3.68),AIF1(-4.76),AJAP1(+2.43),AKAP2(+2.04),AKAP6…
Cancer,Gastrointestinal Disease,Organismal Injury and Abnormalities	Hepatobiliary carcinoma	3.56e-40		-0.753	861	651	210	A2M(+4.05),ABCA12(+2.54),ABCA8(+3.17),ABCC4(-2.19),ABCC5(+1.68),ABCC8(+4.12),ABCC9(+2.43),ABLIM1(+1.7),ABLIM3(+3.62),ACBD3(-1.69),ACRBP(-2.32),ADAM12(+3.56),ADAM9(-1.69),ADAMTS10(+3.13),ADAMTS17(+4.3),ADAMTS19(+3.87),ADAMTS20(+2.39),ADAMTS5(+2.45),ADAMTSL3(+10.28),ADARB1(+1.73),ADARB2(+3.39),ADCY1(+3.35),ADCY2(-1.72),ADCY8(+3.77),ADCYAP1(+4.25),ADGRG1(-1.62),ADIPOR1(-1.58),AFAP1-AS1(+1.93),AFF2(+…
Cancer,Gastrointestinal Disease,Organismal Injury and Abnormalities	Upper gastrointestinal tract cancer	3.89e-40		0.927	614	483	131	A2M(+4.05),ABCA12(+2.54),ABCA8(+3.17),ABCC4(-2.19),ABCC5(+1.68),ABCC8(+4.12),ABCC9(+2.43),ADAM12(+3.56),ADAM9(-1.69),ADAMTS10(+3.13),ADAMTS17(+4.3),ADAMTSL3(+10.28),ADARB1(+1.73),ADCY2(-1.72),ADCY8(+3.77),AFAP1-AS1(+1.93),AFF2(+2.21),AJAP1(+2.43),AKAP2(+2.04),AKAP6(+1.88),ALCAM(+3.09),ALK(+3.89),AMT(-1.62),ANGPT1(+5.6),ANKRD26(-1.77),ANKRD50(+1.66),ANKS1B(+2.02),ANO1(+5.01),APBA1(+2.1),APCDD1L(+2…
Cancer,Organismal Injury and Abnormalities,Reproductive System Disease	Tumorigenesis of reproductive tract	4.17e-40		-0.428	841	651	190	ABCA12(+2.54),ABCA8(+3.17),ABCC4(-2.19),ABCC8(+4.12),ABCC9(+2.43),ABCD4(-1.52),ABLIM3(+3.62),ACP5(-2.76),ACRBP(-2.32),ACSL3(-1.86),ADAM12(+3.56),ADAM9(-1.69),ADAMTS10(+3.13),ADAMTS19(+3.87),ADAMTS20(+2.39),ADAMTS5(+2.45),ADAMTSL3(+10.28),ADARB1(+1.73),ADARB2(+3.39),ADCY1(+3.35),ADCY2(-1.72),ADCYAP1R1(+5.81),ADD2(+2.03),AFF2(+2.21),AFF3(+1.85),AHR(+3.68),AIF1(-4.76),AJAP1(+2.43),AKAP2(+2.04),AKAP6…
Cancer,Organismal Injury and Abnormalities,Reproductive System Disease	Breast or ovarian cancer	4.2e-40		0.56	702	526	176	ABCA12(+2.54),ABCA8(+3.17),ABCC4(-2.19),ABCC5(+1.68),ABCC8(+4.12),ABCC9(+2.43),ABLIM1(+1.7),ABLIM3(+3.62),ACBD3(-1.69),ACP5(-2.76),ACRBP(-2.32),ADAM12(+3.56),ADAM9(-1.69),ADAMTS10(+3.13),ADAMTS14(+3.43),ADAMTS19(+3.87),ADAMTS20(+2.39),ADAMTS5(+2.45),ADAMTS8(+1.83),ADAMTSL3(+10.28),ADARB2(+3.39),ADCY1(+3.35),ADCY2(-1.72),ADCY3(+1.72),ADCYAP1(+4.25),ADCYAP1R1(+5.81),ADD2(+2.03),ADGRD1(-2.98),AFF2(+…
Cancer,Gastrointestinal Disease,Organismal Injury and Abnormalities	Colorectal tumor	6.14e-40		1.343	951	708	243	ABCA12(+2.54),ABCA8(+3.17),ABCC4(-2.19),ABCC5(+1.68),ABCC8(+4.12),ABLIM3(+3.62),ACBD3(-1.69),ACBD6(+2.14),ACP5(-2.76),ACRBP(-2.32),ADAM12(+3.56),ADAM9(-1.69),ADAMTS10(+3.13),ADAMTS14(+3.43),ADAMTS20(+2.39),ADAMTS8(+1.83),ADARB1(+1.73),ADCY2(-1.72),ADCY3(+1.72),ADCY8(+3.77),ADD2(+2.03),ADGRD1(-2.98),ADIPOR1(-1.58),AFAP1(+2.7),AFF2(+2.21),AFF3(+1.85),AJAP1(+2.43),AK5(+2.51),AKAP2(+2.04),AKAP6(+1.88…
Cancer,Gastrointestinal Disease,Organismal Injury and Abnormalities	Colorectal cancer	2.59e-39		0.786	936	695	241	ABCA12(+2.54),ABCA8(+3.17),ABCC4(-2.19),ABCC5(+1.68),ABCC8(+4.12),ABLIM3(+3.62),ACBD3(-1.69),ACBD6(+2.14),ACP5(-2.76),ACRBP(-2.32),ADAM12(+3.56),ADAM9(-1.69),ADAMTS10(+3.13),ADAMTS14(+3.43),ADAMTS20(+2.39),ADAMTS8(+1.83),ADARB1(+1.73),ADCY2(-1.72),ADCY3(+1.72),ADCY8(+3.77),ADD2(+2.03),ADGRD1(-2.98),ADIPOR1(-1.58),AFAP1(+2.7),AFF2(+2.21),AFF3(+1.85),AJAP1(+2.43),AK5(+2.51),AKAP2(+2.04),AKAP6(+1.88…
Cancer,Gastrointestinal Disease,Hepatic System Disease,Organismal Injury and Abnormalities	Liver cancer	4.97e-39		-0.002	845	641	204	ABCA12(+2.54),ABCA8(+3.17),ABCC4(-2.19),ABCC5(+1.68),ABCC8(+4.12),ABCC9(+2.43),ABLIM1(+1.7),ABLIM3(+3.62),ACBD3(-1.69),ACRBP(-2.32),ADAM12(+3.56),ADAM9(-1.69),ADAMTS10(+3.13),ADAMTS17(+4.3),ADAMTS19(+3.87),ADAMTS20(+2.39),ADAMTS5(+2.45),ADAMTSL3(+10.28),ADARB1(+1.73),ADARB2(+3.39),ADCY1(+3.35),ADCY2(-1.72),ADCY8(+3.77),ADCYAP1(+4.25),ADGRG1(-1.62),ADIPOR1(-1.58),AFF2(+2.21),AFF3(+1.85),AGER(-1.91…
Cancer,Organismal Injury and Abnormalities,Respiratory Disease	Respiratory system tumor	8.29e-39		0.966	587	458	129	ABCA12(+2.54),ABCA8(+3.17),ABCC4(-2.19),ABCC5(+1.68),ABCC9(+2.43),ABLIM3(+3.62),ACP5(-2.76),ACSL3(-1.86),ADAM12(+3.56),ADAM9(-1.69),ADAMTS14(+3.43),ADAMTS20(+2.39),ADAMTSL3(+10.28),ADARB1(+1.73),ADCY1(+3.35),ADCY2(-1.72),ADCYAP1R1(+5.81),ADIPOR1(-1.58),AFAP1-AS1(+1.93),AGER(-1.91),AHR(+3.68),AKAP6(+1.88),ALCAM(+3.09),ALDH1A3(+3.21),ALDOA(-1.51),ALDOC(-3.65),ALK(+3.89),ALOX15(-2.39),ANGPT1(+5.6),A…
Cancer,Organismal Injury and Abnormalities,Reproductive System Disease	Female genital tract cancer	1.16e-38		-0.849	816	633	183	ABCA12(+2.54),ABCA8(+3.17),ABCC4(-2.19),ABCC8(+4.12),ABCC9(+2.43),ABCD4(-1.52),ABLIM3(+3.62),ACP5(-2.76),ACRBP(-2.32),ACSL3(-1.86),ADAM9(-1.69),ADAMTS10(+3.13),ADAMTS19(+3.87),ADAMTS20(+2.39),ADAMTS5(+2.45),ADAMTSL3(+10.28),ADARB2(+3.39),ADCY1(+3.35),ADCY2(-1.72),ADCYAP1R1(+5.81),ADD2(+2.03),AFF2(+2.21),AFF3(+1.85),AIF1(-4.76),AJAP1(+2.43),AKAP2(+2.04),AKAP6(+1.88),ALCAM(+3.09),ALK(+3.89),ALKBH7(…
Cancer,Organismal Injury and Abnormalities,Reproductive System Disease	Male genital neoplasm	4.41e-38		1.155	734	550	184	A2M(+4.05),ABCA12(+2.54),ABCC4(-2.19),ABCC5(+1.68),ABCC8(+4.12),ABCC9(+2.43),ACOT13(-1.8),ACP5(-2.76),ACSL3(-1.86),ADAM9(-1.69),ADAMTS14(+3.43),ADAMTS19(+3.87),ADAMTS20(+2.39),ADAMTS5(+2.45),ADARB2(+3.39),ADCY1(+3.35),ADCY2(-1.72),ADCY8(+3.77),ADCYAP1(+4.25),ADD2(+2.03),ADGRD1(-2.98),ADGRG1(-1.62),AFAP1(+2.7),AFF2(+2.21),AGER(-1.91),AK5(+2.51),AKAP2(+2.04),AKAP6(+1.88),ALK(+3.89),ALOX15(-2.39),AM…
Gastrointestinal Disease,Hepatic System Disease,Organismal Injury and Abnormalities	Liver lesion	4.49e-38		0.556	975	728	247	A2M(+4.05),ABCA12(+2.54),ABCA8(+3.17),ABCC4(-2.19),ABCC5(+1.68),ABCC8(+4.12),ABCC9(+2.43),ABLIM1(+1.7),ABLIM3(+3.62),ACBD3(-1.69),ACRBP(-2.32),ADAM12(+3.56),ADAM9(-1.69),ADAMTS10(+3.13),ADAMTS14(+3.43),ADAMTS17(+4.3),ADAMTS19(+3.87),ADAMTS20(+2.39),ADAMTS5(+2.45),ADAMTSL3(+10.28),ADARB1(+1.73),ADARB2(+3.39),ADCY1(+3.35),ADCY2(-1.72),ADCY8(+3.77),ADCYAP1(+4.25),ADGRG1(-1.62),ADIPOR1(-1.58),AFF2(+2…
Cancer,Organismal Injury and Abnormalities,Reproductive System Disease	Malignant neoplasm of male genital organ	5.92e-38		-0.216	729	546	183	A2M(+4.05),ABCA12(+2.54),ABCC4(-2.19),ABCC5(+1.68),ABCC8(+4.12),ABCC9(+2.43),ACOT13(-1.8),ACP5(-2.76),ACSL3(-1.86),ADAM9(-1.69),ADAMTS14(+3.43),ADAMTS19(+3.87),ADAMTS20(+2.39),ADAMTS5(+2.45),ADARB2(+3.39),ADCY1(+3.35),ADCY2(-1.72),ADCY8(+3.77),ADCYAP1(+4.25),ADD2(+2.03),ADGRD1(-2.98),ADGRG1(-1.62),AFAP1(+2.7),AFF2(+2.21),AGER(-1.91),AK5(+2.51),AKAP2(+2.04),AKAP6(+1.88),ALK(+3.89),ALOX15(-2.39),AM…
Cancer,Gastrointestinal Disease,Organismal Injury and Abnormalities	Upper gastrointestinal carcinoma	6e-38			587	466	121	A2M(+4.05),ABCA12(+2.54),ABCA8(+3.17),ABCC4(-2.19),ABCC5(+1.68),ABCC8(+4.12),ABCC9(+2.43),ADAM12(+3.56),ADAM9(-1.69),ADAMTS10(+3.13),ADAMTS17(+4.3),ADAMTSL3(+10.28),ADARB1(+1.73),ADCY2(-1.72),ADCY8(+3.77),AFAP1-AS1(+1.93),AFF2(+2.21),AJAP1(+2.43),AKAP2(+2.04),AKAP6(+1.88),ALCAM(+3.09),ALK(+3.89),AMT(-1.62),ANKRD26(-1.77),ANKRD50(+1.66),ANKS1B(+2.02),ANO1(+5.01),APBA1(+2.1),APCDD1L(+2.38),ARFGEF3(…
Cancer,Gastrointestinal Disease,Hepatic System Disease,Organismal Injury and Abnormalities	Hepatobiliary system cancer	1.09e-37		-0.146	875	662	213	A2M(+4.05),ABCA12(+2.54),ABCA8(+3.17),ABCC4(-2.19),ABCC5(+1.68),ABCC8(+4.12),ABCC9(+2.43),ABLIM1(+1.7),ABLIM3(+3.62),ACBD3(-1.69),ACRBP(-2.32),ADAM12(+3.56),ADAM9(-1.69),ADAMTS10(+3.13),ADAMTS17(+4.3),ADAMTS19(+3.87),ADAMTS20(+2.39),ADAMTS5(+2.45),ADAMTSL3(+10.28),ADARB1(+1.73),ADARB2(+3.39),ADCY1(+3.35),ADCY2(-1.72),ADCY8(+3.77),ADCYAP1(+4.25),ADGRG1(-1.62),ADIPOR1(-1.58),AFAP1-AS1(+1.93),AFF2(+…
Cancer,Organismal Injury and Abnormalities,Reproductive System Disease	Prostate cancer	1.71e-37		-0.216	721	539	182	A2M(+4.05),ABCA12(+2.54),ABCC4(-2.19),ABCC5(+1.68),ABCC8(+4.12),ABCC9(+2.43),ACOT13(-1.8),ACP5(-2.76),ACSL3(-1.86),ADAM9(-1.69),ADAMTS14(+3.43),ADAMTS19(+3.87),ADAMTS20(+2.39),ADAMTS5(+2.45),ADARB2(+3.39),ADCY1(+3.35),ADCY2(-1.72),ADCY8(+3.77),ADCYAP1(+4.25),ADD2(+2.03),ADGRD1(-2.98),ADGRG1(-1.62),AFAP1(+2.7),AFF2(+2.21),AGER(-1.91),AK5(+2.51),AKAP2(+2.04),AKAP6(+1.88),ALK(+3.89),ALOX15(-2.39),AM…
Cancer,Organismal Injury and Abnormalities,Reproductive System Disease	Prostatic tumor	1.88e-37		1.202	724	542	182	A2M(+4.05),ABCA12(+2.54),ABCC4(-2.19),ABCC5(+1.68),ABCC8(+4.12),ABCC9(+2.43),ACOT13(-1.8),ACP5(-2.76),ACSL3(-1.86),ADAM9(-1.69),ADAMTS14(+3.43),ADAMTS19(+3.87),ADAMTS20(+2.39),ADAMTS5(+2.45),ADARB2(+3.39),ADCY1(+3.35),ADCY2(-1.72),ADCY8(+3.77),ADCYAP1(+4.25),ADD2(+2.03),ADGRD1(-2.98),ADGRG1(-1.62),AFAP1(+2.7),AFF2(+2.21),AGER(-1.91),AK5(+2.51),AKAP2(+2.04),AKAP6(+1.88),ALK(+3.89),ALOX15(-2.39),AM…
Cancer,Gastrointestinal Disease,Hepatic System Disease,Organismal Injury and Abnormalities	Liver tumor	2.07e-37		-0.113	945	708	237	A2M(+4.05),ABCA12(+2.54),ABCA8(+3.17),ABCC4(-2.19),ABCC5(+1.68),ABCC8(+4.12),ABCC9(+2.43),ABLIM1(+1.7),ABLIM3(+3.62),ACBD3(-1.69),ACRBP(-2.32),ADAM12(+3.56),ADAM9(-1.69),ADAMTS10(+3.13),ADAMTS14(+3.43),ADAMTS17(+4.3),ADAMTS19(+3.87),ADAMTS20(+2.39),ADAMTS5(+2.45),ADAMTSL3(+10.28),ADARB1(+1.73),ADARB2(+3.39),ADCY1(+3.35),ADCY2(-1.72),ADCY8(+3.77),ADCYAP1(+4.25),ADGRG1(-1.62),ADIPOR1(-1.58),AFF2(+2…
Cancer,Organismal Injury and Abnormalities	Neoplasia of cells	2.57e-37		1.341	853	657	196	ABCA12(+2.54),ABCC5(+1.68),ABCC9(+2.43),ABLIM1(+1.7),ABLIM3(+3.62),ABTB2(+2.14),ACADL(+2.1),ACP5(-2.76),ACSL3(-1.86),ADAM12(+3.56),ADAM9(-1.69),ADAMTS10(+3.13),ADAMTS14(+3.43),ADAMTS17(+4.3),ADAMTS19(+3.87),ADAMTS20(+2.39),ADAMTSL3(+10.28),ADARB1(+1.73),ADARB2(+3.39),ADCY1(+3.35),ADCY3(+1.72),ADCY8(+3.77),ADD2(+2.03),ADGRB1(+2.1),ADIPOR1(-1.58),AFAP1-AS1(+1.93),AFF3(+1.85),AGER(-1.91),AHR(+3.68),…
Cancer,Organismal Injury and Abnormalities	Cancer of cells	3.93e-37		0.833	834	646	188	ABCA12(+2.54),ABCC5(+1.68),ABCC9(+2.43),ABLIM1(+1.7),ABLIM3(+3.62),ABTB2(+2.14),ACADL(+2.1),ACSL3(-1.86),ADAM12(+3.56),ADAM9(-1.69),ADAMTS10(+3.13),ADAMTS14(+3.43),ADAMTS17(+4.3),ADAMTS19(+3.87),ADAMTS20(+2.39),ADAMTSL3(+10.28),ADARB1(+1.73),ADARB2(+3.39),ADCY1(+3.35),ADCY3(+1.72),ADCY8(+3.77),ADD2(+2.03),ADGRB1(+2.1),ADIPOR1(-1.58),AFAP1-AS1(+1.93),AFF3(+1.85),AGER(-1.91),AHR(+3.68),AK5(+2.51),A…
Cancer,Organismal Injury and Abnormalities,Reproductive System Disease	Development of genital tumor	5.79e-37		0.227	807	630	177	ABCA12(+2.54),ABCA8(+3.17),ABCC4(-2.19),ABCC8(+4.12),ABCC9(+2.43),ABCD4(-1.52),ABLIM3(+3.62),ACP5(-2.76),ACSL3(-1.86),ADAM12(+3.56),ADAM9(-1.69),ADAMTS10(+3.13),ADAMTS19(+3.87),ADAMTS20(+2.39),ADAMTS5(+2.45),ADAMTSL3(+10.28),ADARB1(+1.73),ADARB2(+3.39),ADCY1(+3.35),ADCY2(-1.72),ADCYAP1R1(+5.81),ADD2(+2.03),AFF2(+2.21),AFF3(+1.85),AHR(+3.68),AIF1(-4.76),AJAP1(+2.43),AKAP2(+2.04),AKAP6(+1.88),ALDOA…
Cancer,Organismal Injury and Abnormalities	Extraadrenal retroperitoneal tumor	1.85e-36		-0.443	678	517	161	A2M(+4.05),ABCA12(+2.54),ABCC4(-2.19),ABCC9(+2.43),ABCD4(-1.52),ABTB2(+2.14),ACAP1(-2.03),ADAM12(+3.56),ADAM9(-1.69),ADAMTS10(+3.13),ADAMTS17(+4.3),ADAMTS19(+3.87),ADAMTS20(+2.39),ADAMTS5(+2.45),ADAMTSL3(+10.28),ADARB2(+3.39),ADCY1(+3.35),ADCY2(-1.72),ADCY8(+3.77),ADCYAP1(+4.25),ADCYAP1R1(+5.81),AFF2(+2.21),AFF3(+1.85),AGER(-1.91),AHR(+3.68),AJAP1(+2.43),AKAP2(+2.04),AKAP6(+1.88),ALDOA(-1.51),ALK…
Cancer,Gastrointestinal Disease,Organismal Injury and Abnormalities	Development of intestinal tumor	6e-36		0.57	834	625	209	ABCA12(+2.54),ABCA8(+3.17),ABCC4(-2.19),ABCC5(+1.68),ABCC8(+4.12),ABLIM3(+3.62),ACBD3(-1.69),ACBD6(+2.14),ACP5(-2.76),ACRBP(-2.32),ADAMTS10(+3.13),ADAMTS14(+3.43),ADAMTS20(+2.39),ADAMTS8(+1.83),ADARB1(+1.73),ADCY2(-1.72),ADCY3(+1.72),ADCY8(+3.77),ADD2(+2.03),ADIPOR1(-1.58),AFAP1(+2.7),AFF2(+2.21),AFF3(+1.85),AJAP1(+2.43),AK5(+2.51),AKAP2(+2.04),AKAP6(+1.88),ALDH1A3(+3.21),ALDOA(-1.51),ALK(+3.89),…
Cancer,Gastrointestinal Disease,Organismal Injury and Abnormalities	Development of colorectal tumor	1.61e-35		1.432	832	623	209	ABCA12(+2.54),ABCA8(+3.17),ABCC4(-2.19),ABCC5(+1.68),ABCC8(+4.12),ABLIM3(+3.62),ACBD3(-1.69),ACBD6(+2.14),ACP5(-2.76),ACRBP(-2.32),ADAMTS10(+3.13),ADAMTS14(+3.43),ADAMTS20(+2.39),ADAMTS8(+1.83),ADARB1(+1.73),ADCY2(-1.72),ADCY3(+1.72),ADCY8(+3.77),ADD2(+2.03),ADIPOR1(-1.58),AFAP1(+2.7),AFF2(+2.21),AFF3(+1.85),AJAP1(+2.43),AK5(+2.51),AKAP2(+2.04),AKAP6(+1.88),ALDH1A3(+3.21),ALDOA(-1.51),ALK(+3.89),…
Cancer,Gastrointestinal Disease,Organismal Injury and Abnormalities	Colon tumor	1.65e-35		1.274	838	618	220	ABCA12(+2.54),ABCA8(+3.17),ABCC4(-2.19),ABCC5(+1.68),ABCC8(+4.12),ABLIM3(+3.62),ACBD3(-1.69),ACBD6(+2.14),ACP5(-2.76),ACRBP(-2.32),ADAM12(+3.56),ADAMTS10(+3.13),ADAMTS14(+3.43),ADAMTS20(+2.39),ADAMTS8(+1.83),ADARB1(+1.73),ADCY2(-1.72),ADCY3(+1.72),ADCY8(+3.77),ADD2(+2.03),ADGRD1(-2.98),ADIPOR1(-1.58),AFAP1(+2.7),AFF2(+2.21),AFF3(+1.85),AJAP1(+2.43),AK5(+2.51),AKAP2(+2.04),AKAP6(+1.88),ALDH1A3(+3.…
Nervous System Development and Function	Morphology of nervous system	3.98e-35			278	215	63	A2M(+4.05),ADAM9(-1.69),ADCY1(+3.35),ADCY3(+1.72),ADCYAP1(+4.25),ADCYAP1R1(+5.81),ADGRB1(+2.1),ALK(+3.89),APBA1(+2.1),ARX(-5.71),ASCL1(+5.3),ASPM(+2.11),ATP1B2(-1.79),ATP8A2(+2.14),AXL(-1.57),B4GALNT1(+3.19),BHLHE22(+5.15),BMP4(+1.85),BMPR1B(-2.97),BRCA1(+1.77),BRINP1(+3.57),BRSK1(-1.69),BRSK2(+2.27),CACNA1C(+3.21),CACNA1F(-3.83),CACNA2D3(+5.28),CADPS(+1.95),CAMK2B(+3.05),CAMKK2(+2.21),CBLN1(+5.1…
Cancer,Gastrointestinal Disease,Organismal Injury and Abnormalities	Colorectal carcinoma	4.05e-35			830	622	208	ABCA12(+2.54),ABCA8(+3.17),ABCC4(-2.19),ABCC5(+1.68),ABCC8(+4.12),ABLIM3(+3.62),ACBD3(-1.69),ACBD6(+2.14),ACP5(-2.76),ACRBP(-2.32),ADAMTS10(+3.13),ADAMTS14(+3.43),ADAMTS20(+2.39),ADAMTS8(+1.83),ADARB1(+1.73),ADCY2(-1.72),ADCY3(+1.72),ADCY8(+3.77),ADD2(+2.03),ADIPOR1(-1.58),AFAP1(+2.7),AFF2(+2.21),AFF3(+1.85),AJAP1(+2.43),AK5(+2.51),AKAP2(+2.04),AKAP6(+1.88),ALDH1A3(+3.21),ALDOA(-1.51),ALK(+3.89),…
Cancer,Gastrointestinal Disease,Organismal Injury and Abnormalities	Colon cancer	5.22e-35		0.647	829	612	217	ABCA12(+2.54),ABCA8(+3.17),ABCC4(-2.19),ABCC5(+1.68),ABCC8(+4.12),ABLIM3(+3.62),ACBD3(-1.69),ACBD6(+2.14),ACP5(-2.76),ACRBP(-2.32),ADAM12(+3.56),ADAMTS10(+3.13),ADAMTS14(+3.43),ADAMTS20(+2.39),ADAMTS8(+1.83),ADARB1(+1.73),ADCY2(-1.72),ADCY3(+1.72),ADCY8(+3.77),ADD2(+2.03),ADGRD1(-2.98),ADIPOR1(-1.58),AFAP1(+2.7),AFF2(+2.21),AFF3(+1.85),AJAP1(+2.43),AK5(+2.51),AKAP2(+2.04),AKAP6(+1.88),ALDH1A3(+3.…
Cancer,Organismal Injury and Abnormalities	Malignant neoplasm of retroperitoneum	5.4e-35		-1.48	622	475	147	ABCA12(+2.54),ABCC4(-2.19),ABCC9(+2.43),ABCD4(-1.52),ABTB2(+2.14),ACAP1(-2.03),ADAM12(+3.56),ADAM9(-1.69),ADAMTS10(+3.13),ADAMTS17(+4.3),ADAMTS19(+3.87),ADAMTS20(+2.39),ADAMTS5(+2.45),ADAMTSL3(+10.28),ADARB2(+3.39),ADCY1(+3.35),ADCY2(-1.72),ADCY8(+3.77),ADCYAP1(+4.25),ADCYAP1R1(+5.81),AFF2(+2.21),AFF3(+1.85),AGER(-1.91),AHR(+3.68),AJAP1(+2.43),AKAP2(+2.04),ALDOA(-1.51),ALK(+3.89),AMOTL1(+1.8),ANG…
Cellular Development,Cellular Growth and Proliferation,Nervous System Development and Function,Tissue Development	Development of neurons	8.42e-35	Increased	5.758	243	205	38	A2M(+4.05),ADCY1(+3.35),ADCY3(+1.72),ADCYAP1(+4.25),ADD2(+2.03),ADGRB1(+2.1),AGER(-1.91),AHR(+3.68),ALK(+3.89),AMIGO2(+3.9),ANGPT1(+5.6),APBA1(+2.1),ARHGAP33(+2.31),ARX(-5.71),ASCL1(+5.3),ATL1(+2.14),ATP8A2(+2.14),BCL11B(+4.28),BMP4(+1.85),BOC(+1.7),BRSK1(-1.69),BRSK2(+2.27),BSN(+2.15),BTG3(-2.04),CACNA1F(-3.83),CALD1(+1.68),CAMK1D(+1.93),CAMK2B(+3.05),CAMKK2(+2.21),CBLN1(+5.11),CD44(+3.93),CDH1(…
Cancer,Organismal Injury and Abnormalities,Reproductive System Disease	Female genital tract adenocarcinoma	1.47e-34			696	545	151	ABCA12(+2.54),ABCA8(+3.17),ABCC4(-2.19),ABCC8(+4.12),ABCC9(+2.43),ABCD4(-1.52),ABLIM3(+3.62),ACP5(-2.76),ACSL3(-1.86),ADAM9(-1.69),ADAMTS10(+3.13),ADAMTS19(+3.87),ADAMTS20(+2.39),ADAMTSL3(+10.28),ADCY1(+3.35),ADCY2(-1.72),ADCYAP1R1(+5.81),ADD2(+2.03),AFF2(+2.21),AFF3(+1.85),AIF1(-4.76),AJAP1(+2.43),AKAP2(+2.04),AKAP6(+1.88),ALK(+3.89),ALKBH7(-1.81),AMOTL1(+1.8),ANGPT1(+5.6),ANK2(+2.8),ANKRD24(-3.…
Organismal Injury and Abnormalities,Reproductive System Disease	Abnormality of endometrium	5.54e-34			617	493	124	ABCA12(+2.54),ABCA8(+3.17),ABCC8(+4.12),ABCC9(+2.43),ABCD4(-1.52),ABLIM3(+3.62),ACSL3(-1.86),ADAM9(-1.69),ADAMTS5(+2.45),ADARB2(+3.39),ADCY1(+3.35),ADCY2(-1.72),AFF2(+2.21),AGPAT3(+1.58),AJAP1(+2.43),AKAP6(+1.88),ALK(+3.89),ANK2(+2.8),ANKRD26(-1.77),ANKRD50(+1.66),ANKS1B(+2.02),ANO1(+5.01),ANO2(+4.77),ANO4(+2.57),ANXA2(+1.65),AP3B2(+2.89),APLF(-2.7),APPL2(+1.69),AQP1(+2.14),ARAP2(+1.94),ARHGAP20(…
Cancer,Organismal Injury and Abnormalities,Reproductive System Disease	Endometrial cancer	6.35e-34			612	490	122	ABCA12(+2.54),ABCA8(+3.17),ABCC8(+4.12),ABCC9(+2.43),ABCD4(-1.52),ABLIM3(+3.62),ACSL3(-1.86),ADAM9(-1.69),ADAMTS5(+2.45),ADARB2(+3.39),ADCY1(+3.35),ADCY2(-1.72),AFF2(+2.21),AJAP1(+2.43),AKAP6(+1.88),ALK(+3.89),ANK2(+2.8),ANKRD26(-1.77),ANKRD50(+1.66),ANKS1B(+2.02),ANO2(+4.77),ANO4(+2.57),ANXA2(+1.65),AP3B2(+2.89),APLF(-2.7),APPL2(+1.69),AQP1(+2.14),ARAP2(+1.94),ARHGAP20(+3.95),ASPM(+2.11),ASPN(+1…
Cancer,Organismal Injury and Abnormalities,Reproductive System Disease	Uterine tumor	9.62e-34			668	536	132	ABCA12(+2.54),ABCA8(+3.17),ABCC8(+4.12),ABCC9(+2.43),ABCD4(-1.52),ABLIM3(+3.62),ACSL3(-1.86),ADAM12(+3.56),ADAM9(-1.69),ADAMTS5(+2.45),ADARB1(+1.73),ADARB2(+3.39),ADCY1(+3.35),ADCY2(-1.72),AFF2(+2.21),AHR(+3.68),AJAP1(+2.43),AKAP6(+1.88),ALDOA(-1.51),ALK(+3.89),ANK2(+2.8),ANKRD26(-1.77),ANKRD50(+1.66),ANKS1B(+2.02),ANO2(+4.77),ANO4(+2.57),ANXA2(+1.65),AP3B2(+2.89),APLF(-2.7),APPL2(+1.69),AQP1(+2.…
Organismal Injury and Abnormalities,Reproductive System Disease	Abnormal growth in endometrium	1.19e-33			615	493	122	ABCA12(+2.54),ABCA8(+3.17),ABCC8(+4.12),ABCC9(+2.43),ABCD4(-1.52),ABLIM3(+3.62),ACSL3(-1.86),ADAM9(-1.69),ADAMTS5(+2.45),ADARB2(+3.39),ADCY1(+3.35),ADCY2(-1.72),AFF2(+2.21),AGPAT3(+1.58),AJAP1(+2.43),AKAP6(+1.88),ALK(+3.89),ANK2(+2.8),ANKRD26(-1.77),ANKRD50(+1.66),ANKS1B(+2.02),ANO1(+5.01),ANO2(+4.77),ANO4(+2.57),ANXA2(+1.65),AP3B2(+2.89),APLF(-2.7),APPL2(+1.69),AQP1(+2.14),ARAP2(+1.94),ARHGAP20(…
Cancer,Gastrointestinal Disease,Organismal Injury and Abnormalities	Colorectal adenocarcinoma	1.6e-33			808	605	203	ABCA12(+2.54),ABCA8(+3.17),ABCC4(-2.19),ABCC5(+1.68),ABCC8(+4.12),ABLIM3(+3.62),ACBD3(-1.69),ACBD6(+2.14),ACP5(-2.76),ACRBP(-2.32),ADAMTS10(+3.13),ADAMTS14(+3.43),ADAMTS20(+2.39),ADAMTS8(+1.83),ADARB1(+1.73),ADCY2(-1.72),ADCY3(+1.72),ADCY8(+3.77),ADD2(+2.03),ADIPOR1(-1.58),AFAP1(+2.7),AFF2(+2.21),AFF3(+1.85),AJAP1(+2.43),AK5(+2.51),AKAP2(+2.04),AKAP6(+1.88),ALDH1A3(+3.21),ALDOA(-1.51),ALK(+3.89),…
Cancer,Organismal Injury and Abnormalities,Reproductive System Disease	Breast or ovarian carcinoma	3.29e-33		0.631	579	445	134	ABCA12(+2.54),ABCA8(+3.17),ABCC4(-2.19),ABCC5(+1.68),ABCC8(+4.12),ABCC9(+2.43),ABLIM1(+1.7),ABLIM3(+3.62),ACP5(-2.76),ADAMTS10(+3.13),ADAMTS14(+3.43),ADAMTS19(+3.87),ADAMTS20(+2.39),ADAMTS5(+2.45),ADAMTS8(+1.83),ADAMTSL3(+10.28),ADARB2(+3.39),ADCY1(+3.35),ADCY2(-1.72),ADCY3(+1.72),ADCYAP1(+4.25),ADCYAP1R1(+5.81),ADD2(+2.03),AFF2(+2.21),AFF3(+1.85),AIF1(-4.76),AKAP2(+2.04),AKAP6(+1.88),ALK(+3.89),…
Organismal Survival	Organismal death	1.08e-32	Decreased	-10.034	537	393	144	ABCA12(+2.54),ABCC4(-2.19),ABCC9(+2.43),ACADL(+2.1),ACRBP(-2.32),ADAM12(+3.56),ADAM9(-1.69),ADARB1(+1.73),ADCY3(+1.72),ADCYAP1(+4.25),ADCYAP1R1(+5.81),ADGRG1(-1.62),AFAP1-AS1(+1.93),AGER(-1.91),AHR(+3.68),AKAP6(+1.88),ALDH1A3(+3.21),ALDOA(-1.51),ALK(+3.89),ALOX15(-2.39),ANG(-3.03),ANGPT1(+5.6),ANK2(+2.8),ANKH(+1.95),ANO1(+5.01),ANXA2(+1.65),APBA1(+2.1),APBA3(-1.67),APEX1(+1.71),AQP1(+2.14),ARF1(-…
Cancer,Gastrointestinal Disease,Organismal Injury and Abnormalities	Colon carcinoma	1.08e-32			791	590	201	ABCA12(+2.54),ABCA8(+3.17),ABCC4(-2.19),ABCC5(+1.68),ABCC8(+4.12),ABLIM3(+3.62),ACBD3(-1.69),ACBD6(+2.14),ACP5(-2.76),ACRBP(-2.32),ADAMTS10(+3.13),ADAMTS14(+3.43),ADAMTS20(+2.39),ADAMTS8(+1.83),ADARB1(+1.73),ADCY2(-1.72),ADCY3(+1.72),ADCY8(+3.77),ADD2(+2.03),ADIPOR1(-1.58),AFAP1(+2.7),AFF2(+2.21),AFF3(+1.85),AJAP1(+2.43),AK5(+2.51),AKAP2(+2.04),AKAP6(+1.88),ALDH1A3(+3.21),ALDOA(-1.51),ALK(+3.89),…
Cancer,Organismal Injury and Abnormalities	Malignant neoplasm of aerodigestive tract	1.72e-32			473	380	93	ABCA12(+2.54),ABCA8(+3.17),ABCC4(-2.19),ABCC5(+1.68),ABCC9(+2.43),ABLIM3(+3.62),ACSL3(-1.86),ADAM12(+3.56),ADAM9(-1.69),ADAMTS14(+3.43),ADAMTS17(+4.3),ADAMTS20(+2.39),ADAMTSL3(+10.28),ADARB1(+1.73),ADCY1(+3.35),AFAP1-AS1(+1.93),AJAP1(+2.43),AKAP6(+1.88),ALK(+3.89),ANGPT1(+5.6),ANKRD26(-1.77),ANKRD50(+1.66),ANKS1B(+2.02),ANO1(+5.01),APCDD1L(+2.38),ARFGEF3(-1.73),ARHGAP28(+3.07),ARHGAP31(+4.04),ARH…
Cancer,Organismal Injury and Abnormalities,Reproductive System Disease	Uterine cancer	3.07e-32			641	514	127	ABCA12(+2.54),ABCA8(+3.17),ABCC8(+4.12),ABCC9(+2.43),ABCD4(-1.52),ABLIM3(+3.62),ACSL3(-1.86),ADAM9(-1.69),ADAMTS5(+2.45),ADARB2(+3.39),ADCY1(+3.35),ADCY2(-1.72),AFF2(+2.21),AJAP1(+2.43),AKAP6(+1.88),ALK(+3.89),ANK2(+2.8),ANKRD26(-1.77),ANKRD50(+1.66),ANKS1B(+2.02),ANO2(+4.77),ANO4(+2.57),ANXA2(+1.65),AP3B2(+2.89),APLF(-2.7),APPL2(+1.69),AQP1(+2.14),ARAP2(+1.94),ARHGAP20(+3.95),ASPM(+2.11),ASPN(+1…
Cancer,Organismal Injury and Abnormalities	Upper aerodigestive tract carcinoma	6.36e-32			463	373	90	ABCA12(+2.54),ABCA8(+3.17),ABCC4(-2.19),ABCC5(+1.68),ABCC9(+2.43),ABLIM3(+3.62),ACSL3(-1.86),ADAM12(+3.56),ADAM9(-1.69),ADAMTS14(+3.43),ADAMTS17(+4.3),ADAMTS20(+2.39),ADAMTSL3(+10.28),ADARB1(+1.73),ADCY1(+3.35),AFAP1-AS1(+1.93),AJAP1(+2.43),AKAP6(+1.88),ALK(+3.89),ANKRD26(-1.77),ANKRD50(+1.66),ANKS1B(+2.02),ANO1(+5.01),APCDD1L(+2.38),ARFGEF3(-1.73),ARHGAP28(+3.07),ARHGAP31(+4.04),ARHGEF40(+1.86),…
Cancer,Gastrointestinal Disease,Organismal Injury and Abnormalities	Gastroesophageal cancer	1.04e-31			422	333	89	A2M(+4.05),ABCA12(+2.54),ABCA8(+3.17),ABCC4(-2.19),ABCC5(+1.68),ABCC8(+4.12),ABCC9(+2.43),ADAM12(+3.56),ADAM9(-1.69),ADAMTS10(+3.13),ADARB1(+1.73),ADCY2(-1.72),ADCY8(+3.77),AFF2(+2.21),AJAP1(+2.43),AKAP2(+2.04),AKAP6(+1.88),ALCAM(+3.09),ALK(+3.89),AMT(-1.62),ANGPT1(+5.6),ANO1(+5.01),APBA1(+2.1),APCDD1L(+2.38),ARHGAP20(+3.95),ARHGAP28(+3.07),ARHGEF40(+1.86),ASCL1(+5.3),ASTN2(+1.88),ATF5(+2.66),ATP…
Organismal Survival	Morbidity or mortality	1.15e-31	Decreased	-10.136	539	395	144	ABCA12(+2.54),ABCC4(-2.19),ABCC8(+4.12),ABCC9(+2.43),ACADL(+2.1),ACRBP(-2.32),ADAM12(+3.56),ADAM9(-1.69),ADARB1(+1.73),ADCY3(+1.72),ADCYAP1(+4.25),ADCYAP1R1(+5.81),ADGRG1(-1.62),AFAP1-AS1(+1.93),AGER(-1.91),AHR(+3.68),AKAP6(+1.88),ALDH1A3(+3.21),ALDOA(-1.51),ALK(+3.89),ALOX15(-2.39),ANG(-3.03),ANGPT1(+5.6),ANK2(+2.8),ANKH(+1.95),ANO1(+5.01),ANXA2(+1.65),APBA1(+2.1),APBA3(-1.67),APEX1(+1.71),AQP1(…
Endocrine System Disorders,Gastrointestinal Disease,Organismal Injury and Abnormalities	Pancreatic mass	1.67e-31		-0.51	550	426	124	A2M(+4.05),ABCA12(+2.54),ABCC4(-2.19),ABCC9(+2.43),ABCD4(-1.52),ABTB2(+2.14),ACAP1(-2.03),ADAM12(+3.56),ADAM9(-1.69),ADAMTS10(+3.13),ADAMTS17(+4.3),ADAMTS19(+3.87),ADAMTS20(+2.39),ADAMTS5(+2.45),ADAMTSL3(+10.28),ADARB2(+3.39),ADCY1(+3.35),ADCY2(-1.72),ADCY8(+3.77),ADCYAP1(+4.25),ADCYAP1R1(+5.81),AFF2(+2.21),AFF3(+1.85),AGER(-1.91),AHR(+3.68),AJAP1(+2.43),AKAP6(+1.88),ALDOA(-1.51),ALK(+3.89),AMOTL…
Cancer,Gastrointestinal Disease,Organismal Injury and Abnormalities	Colon adenocarcinoma	1.69e-31			777	580	197	ABCA12(+2.54),ABCA8(+3.17),ABCC4(-2.19),ABCC5(+1.68),ABCC8(+4.12),ABLIM3(+3.62),ACBD3(-1.69),ACBD6(+2.14),ACP5(-2.76),ACRBP(-2.32),ADAMTS10(+3.13),ADAMTS14(+3.43),ADAMTS20(+2.39),ADAMTS8(+1.83),ADARB1(+1.73),ADCY2(-1.72),ADCY3(+1.72),ADCY8(+3.77),ADD2(+2.03),ADIPOR1(-1.58),AFAP1(+2.7),AFF2(+2.21),AFF3(+1.85),AJAP1(+2.43),AK5(+2.51),AKAP2(+2.04),AKAP6(+1.88),ALDH1A3(+3.21),ALDOA(-1.51),ALK(+3.89),…
Cancer,Endocrine System Disorders,Gastrointestinal Disease,Organismal Injury and Abnormalities	Pancreatic tumor	2.43e-31		-0.51	549	425	124	A2M(+4.05),ABCA12(+2.54),ABCC4(-2.19),ABCC9(+2.43),ABCD4(-1.52),ABTB2(+2.14),ACAP1(-2.03),ADAM12(+3.56),ADAM9(-1.69),ADAMTS10(+3.13),ADAMTS17(+4.3),ADAMTS19(+3.87),ADAMTS20(+2.39),ADAMTS5(+2.45),ADAMTSL3(+10.28),ADARB2(+3.39),ADCY1(+3.35),ADCY2(-1.72),ADCY8(+3.77),ADCYAP1(+4.25),ADCYAP1R1(+5.81),AFF2(+2.21),AFF3(+1.85),AGER(-1.91),AHR(+3.68),AJAP1(+2.43),AKAP6(+1.88),ALDOA(-1.51),ALK(+3.89),AMOTL…
Cancer,Organismal Injury and Abnormalities	Squamous-cell carcinoma	5.95e-31		1.594	640	509	131	ABCA12(+2.54),ABCC5(+1.68),ABCC9(+2.43),ABLIM3(+3.62),ABTB2(+2.14),ACADL(+2.1),ACSL3(-1.86),ADAM12(+3.56),ADAM9(-1.69),ADAMTS10(+3.13),ADAMTS14(+3.43),ADAMTS17(+4.3),ADAMTS19(+3.87),ADAMTS20(+2.39),ADAMTSL3(+10.28),ADARB1(+1.73),ADCY1(+3.35),ADCY8(+3.77),ADIPOR1(-1.58),AFF3(+1.85),AK5(+2.51),AKAP2(+2.04),AKAP6(+1.88),ALCAM(+3.09),ALK(+3.89),ANGPT1(+5.6),ANGPTL2(+2.25),ANKRD26(-1.77),ANKRD50(+1.66…
Cancer,Organismal Injury and Abnormalities	Neoplasia of epithelial cells	6.03e-31	Increased	2.182	641	510	131	ABCA12(+2.54),ABCC5(+1.68),ABCC9(+2.43),ABLIM3(+3.62),ABTB2(+2.14),ACADL(+2.1),ACSL3(-1.86),ADAM12(+3.56),ADAM9(-1.69),ADAMTS10(+3.13),ADAMTS14(+3.43),ADAMTS17(+4.3),ADAMTS19(+3.87),ADAMTS20(+2.39),ADAMTSL3(+10.28),ADARB1(+1.73),ADCY1(+3.35),ADCY8(+3.77),ADIPOR1(-1.58),AFF3(+1.85),AK5(+2.51),AKAP2(+2.04),AKAP6(+1.88),ALCAM(+3.09),ALK(+3.89),ANGPT1(+5.6),ANGPTL2(+2.25),ANKRD26(-1.77),ANKRD50(+1.66…
Nervous System Development and Function,Neurological Disease	Abnormal morphology of nervous system	1.8e-30			234	181	53	ADAM9(-1.69),ADCY1(+3.35),ADCY3(+1.72),ADCYAP1(+4.25),ALK(+3.89),ARX(-5.71),ASCL1(+5.3),ASPM(+2.11),ATP1B2(-1.79),ATP8A2(+2.14),AXL(-1.57),B4GALNT1(+3.19),BHLHE22(+5.15),BMP4(+1.85),BMPR1B(-2.97),BRCA1(+1.77),BRINP1(+3.57),BRSK1(-1.69),BRSK2(+2.27),CACNA1C(+3.21),CACNA1F(-3.83),CADPS(+1.95),CAMKK2(+2.21),CBLN1(+5.11),CBS/CBSL(+2.37),CD44(+3.93),CDH23(-1.49),CDK20(-1.81),CDK5R1(+2.97),CDON(+1.56),…
Cancer,Organismal Injury and Abnormalities,Respiratory Disease	Lung tumor	3.58e-30		0.703	476	363	113	ABCA12(+2.54),ABCA8(+3.17),ABCC4(-2.19),ABCC5(+1.68),ACP5(-2.76),ADAM12(+3.56),ADAM9(-1.69),ADAMTS14(+3.43),ADCY2(-1.72),ADCYAP1R1(+5.81),ADIPOR1(-1.58),AFAP1-AS1(+1.93),AGER(-1.91),AHR(+3.68),ALCAM(+3.09),ALDH1A3(+3.21),ALDOA(-1.51),ALDOC(-3.65),ALK(+3.89),ALOX15(-2.39),ANGPT1(+5.6),ANGPTL2(+2.25),ANK2(+2.8),ANKRD26(-1.77),ANKS1B(+2.02),ANO2(+4.77),ANXA2(+1.65),APEX1(+1.71),ARAP2(+1.94),ARHGAP33…
Cancer,Organismal Injury and Abnormalities,Respiratory Disease	Lung cancer	6.96e-30		0.812	465	357	108	ABCA12(+2.54),ABCA8(+3.17),ABCC4(-2.19),ABCC5(+1.68),ADAM12(+3.56),ADAM9(-1.69),ADAMTS14(+3.43),ADCY2(-1.72),ADCYAP1R1(+5.81),ADIPOR1(-1.58),AFAP1-AS1(+1.93),AHR(+3.68),ALCAM(+3.09),ALDH1A3(+3.21),ALDOA(-1.51),ALDOC(-3.65),ALK(+3.89),ANGPT1(+5.6),ANGPTL2(+2.25),ANK2(+2.8),ANKRD26(-1.77),ANKS1B(+2.02),ANO2(+4.77),ANXA2(+1.65),APEX1(+1.71),ARAP2(+1.94),ARHGAP33(+2.31),ARRB1(+2.62),ATP10A(+2.87),ATP…
Cancer,Gastrointestinal Disease,Organismal Injury and Abnormalities	Gastroesophageal adenocarcinoma	7.77e-30			363	295	68	A2M(+4.05),ABCA12(+2.54),ABCA8(+3.17),ABCC4(-2.19),ABCC5(+1.68),ABCC8(+4.12),ABCC9(+2.43),ADAMTS10(+3.13),ADARB1(+1.73),ADCY2(-1.72),ADCY8(+3.77),AFF2(+2.21),AJAP1(+2.43),AKAP2(+2.04),AKAP6(+1.88),ALK(+3.89),AMT(-1.62),ANO1(+5.01),APBA1(+2.1),APCDD1L(+2.38),ARHGAP20(+3.95),ARHGAP28(+3.07),ARHGEF40(+1.86),ASCL1(+5.3),ASTN2(+1.88),ATP6V1C2(+4.46),ATP8A1(+3.33),ATP9A(+1.56),AUTS2(+3.63),AXIN2(+3.19)…
Cancer,Gastrointestinal Disease,Organismal Injury and Abnormalities	Gastro-esophageal carcinoma	8.19e-30			393	315	78	A2M(+4.05),ABCA12(+2.54),ABCA8(+3.17),ABCC4(-2.19),ABCC5(+1.68),ABCC8(+4.12),ABCC9(+2.43),ADAM9(-1.69),ADAMTS10(+3.13),ADARB1(+1.73),ADCY2(-1.72),ADCY8(+3.77),AFF2(+2.21),AJAP1(+2.43),AKAP2(+2.04),AKAP6(+1.88),ALCAM(+3.09),ALK(+3.89),AMT(-1.62),ANO1(+5.01),APBA1(+2.1),APCDD1L(+2.38),ARHGAP20(+3.95),ARHGAP28(+3.07),ARHGEF40(+1.86),ASCL1(+5.3),ASTN2(+1.88),ATF5(+2.66),ATP6V1C2(+4.46),ATP8A1(+3.33),…
Cancer,Organismal Injury and Abnormalities,Reproductive System Disease	Prostatic carcinoma	1.12e-29		-1	619	467	152	A2M(+4.05),ABCA12(+2.54),ABCC4(-2.19),ABCC5(+1.68),ABCC8(+4.12),ABCC9(+2.43),ACP5(-2.76),ACSL3(-1.86),ADAM9(-1.69),ADAMTS14(+3.43),ADAMTS19(+3.87),ADAMTS20(+2.39),ADAMTS5(+2.45),ADARB2(+3.39),ADCY1(+3.35),ADCY2(-1.72),ADCY8(+3.77),ADCYAP1(+4.25),ADD2(+2.03),ADGRG1(-1.62),AFAP1(+2.7),AFF2(+2.21),AK5(+2.51),AKAP2(+2.04),AKAP6(+1.88),ALK(+3.89),ALOX15(-2.39),AMT(-1.62),AMZ2(-1.79),ANK2(+2.8),ANKRD1(…
Cancer,Organismal Injury and Abnormalities	Thoracic neoplasm	1.99e-29		0.206	478	365	113	ABCA12(+2.54),ABCA8(+3.17),ABCC4(-2.19),ABCC5(+1.68),ACP5(-2.76),ADAM12(+3.56),ADAM9(-1.69),ADAMTS14(+3.43),ADCY2(-1.72),ADCYAP1R1(+5.81),ADIPOR1(-1.58),AFAP1-AS1(+1.93),AGER(-1.91),AHR(+3.68),ALCAM(+3.09),ALDH1A3(+3.21),ALDOA(-1.51),ALDOC(-3.65),ALK(+3.89),ALOX15(-2.39),ANGPT1(+5.6),ANGPTL2(+2.25),ANK2(+2.8),ANKRD26(-1.77),ANKS1B(+2.02),ANO2(+4.77),ANXA2(+1.65),APEX1(+1.71),ARAP2(+1.94),ARHGAP33…
Cancer,Organismal Injury and Abnormalities	Thoracic cancer	3.46e-29		0.272	466	358	108	ABCA12(+2.54),ABCA8(+3.17),ABCC4(-2.19),ABCC5(+1.68),ADAM12(+3.56),ADAM9(-1.69),ADAMTS14(+3.43),ADCY2(-1.72),ADCYAP1R1(+5.81),ADIPOR1(-1.58),AFAP1-AS1(+1.93),AHR(+3.68),ALCAM(+3.09),ALDH1A3(+3.21),ALDOA(-1.51),ALDOC(-3.65),ALK(+3.89),ANGPT1(+5.6),ANGPTL2(+2.25),ANK2(+2.8),ANKRD26(-1.77),ANKS1B(+2.02),ANO2(+4.77),ANXA2(+1.65),APEX1(+1.71),ARAP2(+1.94),ARHGAP33(+2.31),ARRB1(+2.62),ATP10A(+2.87),ATP…
Cancer,Organismal Injury and Abnormalities,Renal and Urological Disease	Urinary tract cancer	5.49e-29		-1.134	435	314	121	ABCA12(+2.54),ABCC8(+4.12),ADAMTS14(+3.43),ADAMTS20(+2.39),ADAMTSL3(+10.28),ADCY2(-1.72),ADCY8(+3.77),AFF3(+1.85),AGER(-1.91),AHR(+3.68),AKAP2(+2.04),ALK(+3.89),AMIGO2(+3.9),ANGPTL2(+2.25),ANK2(+2.8),ANKS1B(+2.02),ANXA2(+1.65),APBA1(+2.1),ARAP2(+1.94),ARFGEF3(-1.73),ARX(-5.71),ASPM(+2.11),ATP1A3(+2.61),ATP1B1(-2.11),ATP9A(+1.56),AUTS2(+3.63),AXIN2(+3.19),AXL(-1.57),BCKDHA(-1.77),BIRC5(+2.19),BLZF…
Cancer,Organismal Injury and Abnormalities,Reproductive System Disease	Formation of uterine carcinoma	5.98e-29			565	455	110	ABCA12(+2.54),ABCA8(+3.17),ABCC8(+4.12),ABCC9(+2.43),ABCD4(-1.52),ABLIM3(+3.62),ACSL3(-1.86),ADAM9(-1.69),ADARB2(+3.39),ADCY1(+3.35),ADCY2(-1.72),AFF2(+2.21),AJAP1(+2.43),AKAP6(+1.88),ALK(+3.89),ANK2(+2.8),ANKRD26(-1.77),ANKRD50(+1.66),ANKS1B(+2.02),ANO2(+4.77),ANO4(+2.57),AP3B2(+2.89),APLF(-2.7),APPL2(+1.69),ARAP2(+1.94),ARHGAP20(+3.95),ASPM(+2.11),ASPN(+14.68),ASTN2(+1.88),ATL1(+2.14),ATP10A(+2…
Cancer,Organismal Injury and Abnormalities,Renal and Urological Disease	Urinary tract tumor	6.52e-29		-0.632	443	321	122	ABCA12(+2.54),ABCC8(+4.12),ADAMTS14(+3.43),ADAMTS20(+2.39),ADAMTSL3(+10.28),ADCY2(-1.72),ADCY8(+3.77),AFF3(+1.85),AGER(-1.91),AHR(+3.68),AKAP2(+2.04),ALK(+3.89),AMIGO2(+3.9),ANGPTL2(+2.25),ANK2(+2.8),ANKS1B(+2.02),ANXA2(+1.65),APBA1(+2.1),ARAP2(+1.94),ARFGEF3(-1.73),ARX(-5.71),ASPM(+2.11),ATP1A3(+2.61),ATP1B1(-2.11),ATP9A(+1.56),AUTS2(+3.63),AXIN2(+3.19),AXL(-1.57),BCKDHA(-1.77),BIRC5(+2.19),BLZF…
Cancer,Endocrine System Disorders,Gastrointestinal Disease,Organismal Injury and Abnormalities	Pancreatic cancer	9.13e-29			484	379	105	ABCA12(+2.54),ABCC4(-2.19),ABCC9(+2.43),ABCD4(-1.52),ABTB2(+2.14),ACAP1(-2.03),ADAM12(+3.56),ADAM9(-1.69),ADAMTS10(+3.13),ADAMTS17(+4.3),ADAMTS19(+3.87),ADAMTS20(+2.39),ADAMTS5(+2.45),ADAMTSL3(+10.28),ADARB2(+3.39),ADCY1(+3.35),ADCY8(+3.77),ADCYAP1(+4.25),ADCYAP1R1(+5.81),AFF2(+2.21),AFF3(+1.85),AHR(+3.68),AJAP1(+2.43),ALDOA(-1.51),ALK(+3.89),AMOTL1(+1.8),ANGPT1(+5.6),ANK2(+2.8),ANKRD24(-3.32),AN…
Cancer,Organismal Injury and Abnormalities,Reproductive System Disease	Endometrial carcinoma	1.04e-28			564	454	110	ABCA12(+2.54),ABCA8(+3.17),ABCC8(+4.12),ABCC9(+2.43),ABCD4(-1.52),ABLIM3(+3.62),ACSL3(-1.86),ADAM9(-1.69),ADARB2(+3.39),ADCY1(+3.35),ADCY2(-1.72),AFF2(+2.21),AJAP1(+2.43),AKAP6(+1.88),ALK(+3.89),ANK2(+2.8),ANKRD26(-1.77),ANKRD50(+1.66),ANKS1B(+2.02),ANO2(+4.77),ANO4(+2.57),AP3B2(+2.89),APLF(-2.7),APPL2(+1.69),ARAP2(+1.94),ARHGAP20(+3.95),ASPM(+2.11),ASPN(+14.68),ASTN2(+1.88),ATL1(+2.14),ATP10A(+2…
Embryonic Development,Organ Development,Organismal Development,Tissue Development	Development of sensory organ	4.77e-28	Increased	2.133	172	134	38	ADAM9(-1.69),ADCY1(+3.35),ADCY3(+1.72),ADCYAP1(+4.25),AGPAT3(+1.58),ALDH1A3(+3.21),ALOX15(-2.39),AQP1(+2.14),ARSB(+1.72),ASCL1(+5.3),ATP1B2(-1.79),ATP8A2(+2.14),BMP4(+1.85),BMP5(+3.06),BMPER(+5.67),BMPR1B(-2.97),BNC2(+3.43),CACNA1F(-3.83),CBS/CBSL(+2.37),CCL2(+2.16),CDH23(-1.49),CDHR1(+2.89),CDK20(-1.81),CDKN1A(-2.32),CEBPD(+2.36),CEP290(-1.67),CFH(+16.28),CLIC4(+1.64),CNGA3(+5.89),COL1A1(+3.04),…
Cancer,Endocrine System Disorders,Gastrointestinal Disease,Organismal Injury and Abnormalities	Pancreatic carcinoma	5.45e-28			460	358	102	ABCA12(+2.54),ABCC4(-2.19),ABCC9(+2.43),ABCD4(-1.52),ABTB2(+2.14),ACAP1(-2.03),ADAM12(+3.56),ADAM9(-1.69),ADAMTS10(+3.13),ADAMTS17(+4.3),ADAMTS19(+3.87),ADAMTS20(+2.39),ADAMTS5(+2.45),ADAMTSL3(+10.28),ADARB2(+3.39),ADCY1(+3.35),ADCY8(+3.77),ADCYAP1(+4.25),ADCYAP1R1(+5.81),AFF2(+2.21),AFF3(+1.85),AHR(+3.68),AJAP1(+2.43),ALDOA(-1.51),ALK(+3.89),AMOTL1(+1.8),ANGPT1(+5.6),ANK2(+2.8),ANKRD24(-3.32),AN…
Cancer,Organismal Injury and Abnormalities,Respiratory Disease	Lung carcinoma	7.42e-28		-0.089	427	328	99	ABCA12(+2.54),ABCA8(+3.17),ABCC5(+1.68),ADAM12(+3.56),ADAM9(-1.69),ADAMTS14(+3.43),ADCY2(-1.72),ADCYAP1R1(+5.81),ADIPOR1(-1.58),AFAP1-AS1(+1.93),AHR(+3.68),ALCAM(+3.09),ALDH1A3(+3.21),ALDOA(-1.51),ALDOC(-3.65),ALK(+3.89),ANGPT1(+5.6),ANGPTL2(+2.25),ANK2(+2.8),ANKRD26(-1.77),ANKS1B(+2.02),ANO2(+4.77),ANXA2(+1.65),APEX1(+1.71),ARAP2(+1.94),ARHGAP33(+2.31),ARRB1(+2.62),ATP10A(+2.87),ATP1A3(+2.61),AT…
Cancer,Gastrointestinal Disease,Organismal Injury and Abnormalities	Pancreatobiliary tumor	2.36e-27		-0.722	589	457	132	A2M(+4.05),ABCA12(+2.54),ABCC4(-2.19),ABCC9(+2.43),ABCD4(-1.52),ABTB2(+2.14),ACAP1(-2.03),ADAM12(+3.56),ADAM9(-1.69),ADAMTS10(+3.13),ADAMTS17(+4.3),ADAMTS19(+3.87),ADAMTS20(+2.39),ADAMTS5(+2.45),ADAMTSL3(+10.28),ADARB2(+3.39),ADCY1(+3.35),ADCY2(-1.72),ADCY8(+3.77),ADCYAP1(+4.25),ADCYAP1R1(+5.81),AFAP1-AS1(+1.93),AFF2(+2.21),AFF3(+1.85),AGER(-1.91),AHR(+3.68),AJAP1(+2.43),AKAP6(+1.88),ALDOA(-1.51)…
Cancer,Organismal Injury and Abnormalities,Reproductive System Disease	Uterine carcinoma	2.43e-27			587	472	115	ABCA12(+2.54),ABCA8(+3.17),ABCC8(+4.12),ABCC9(+2.43),ABCD4(-1.52),ABLIM3(+3.62),ACSL3(-1.86),ADAM9(-1.69),ADARB2(+3.39),ADCY1(+3.35),ADCY2(-1.72),AFF2(+2.21),AJAP1(+2.43),AKAP6(+1.88),ALK(+3.89),ANK2(+2.8),ANKRD26(-1.77),ANKRD50(+1.66),ANKS1B(+2.02),ANO2(+4.77),ANO4(+2.57),AP3B2(+2.89),APLF(-2.7),APPL2(+1.69),ARAP2(+1.94),ARHGAP20(+3.95),ASPM(+2.11),ASPN(+14.68),ASTN2(+1.88),ATL1(+2.14),ATP10A(+2…
Cancer,Gastrointestinal Disease,Organismal Injury and Abnormalities	Stomach tumor	2.9e-27		-0.199	340	270	70	A2M(+4.05),ABCA12(+2.54),ABCC4(-2.19),ABCC5(+1.68),ABCC8(+4.12),ABCC9(+2.43),ADAM12(+3.56),ADAM9(-1.69),ADAMTS10(+3.13),ADARB1(+1.73),ADCY2(-1.72),ADCY8(+3.77),AFF2(+2.21),AHR(+3.68),AKAP2(+2.04),ALCAM(+3.09),AMT(-1.62),APBA1(+2.1),ARHGAP20(+3.95),ARHGEF40(+1.86),ASCL1(+5.3),ATP6V1C2(+4.46),ATP8A1(+3.33),ATP9A(+1.56),AUTS2(+3.63),AXIN2(+3.19),B4GALNT1(+3.19),BACE2(+1.84),BARHL1(+2.44),BCKDHA(-1.7…
Gastrointestinal Disease,Organismal Injury and Abnormalities	Gastric lesion	2.99e-27		-0.503	341	271	70	A2M(+4.05),ABCA12(+2.54),ABCC4(-2.19),ABCC5(+1.68),ABCC8(+4.12),ABCC9(+2.43),ADAM12(+3.56),ADAM9(-1.69),ADAMTS10(+3.13),ADARB1(+1.73),ADCY2(-1.72),ADCY8(+3.77),AFF2(+2.21),AHR(+3.68),AKAP2(+2.04),ALCAM(+3.09),AMT(-1.62),APBA1(+2.1),ARHGAP20(+3.95),ARHGEF40(+1.86),ASCL1(+5.3),ATP6V1C2(+4.46),ATP8A1(+3.33),ATP9A(+1.56),AUTS2(+3.63),AXIN2(+3.19),B4GALNT1(+3.19),BACE2(+1.84),BARHL1(+2.44),BCKDHA(-1.7…
Cancer,Organismal Injury and Abnormalities,Reproductive System Disease	Breast cancer	9.63e-27		0.748	476	356	120	ABCA8(+3.17),ABCC4(-2.19),ABCC5(+1.68),ABCC9(+2.43),ABLIM1(+1.7),ABLIM3(+3.62),ACBD3(-1.69),ACP5(-2.76),ADAM12(+3.56),ADAM9(-1.69),ADAMTS10(+3.13),ADAMTS14(+3.43),ADAMTS20(+2.39),ADAMTS5(+2.45),ADAMTS8(+1.83),ADARB2(+3.39),ADCY2(-1.72),ADCY3(+1.72),ADCYAP1(+4.25),ADGRD1(-2.98),AFF2(+2.21),AGER(-1.91),AKAP6(+1.88),ALDH1A3(+3.21),ALDOA(-1.51),ALDOC(-3.65),ALK(+3.89),ALOX15(-2.39),ANG(-3.03),ANGPTL2…
Cell Morphology,Cellular Development,Cellular Growth and Proliferation,Nervous System Development and Function,Organismal Development,Tissue Development	Morphogenesis of neurons	4.37e-26	Increased	4.734	183	155	28	A2M(+4.05),ADCY1(+3.35),ADCY3(+1.72),ADCYAP1(+4.25),ADGRB1(+2.1),AGER(-1.91),AHR(+3.68),ANGPT1(+5.6),APBA1(+2.1),ARHGAP33(+2.31),ASCL1(+5.3),ATL1(+2.14),ATP8A2(+2.14),BCL11B(+4.28),BOC(+1.7),BRSK1(-1.69),BRSK2(+2.27),BSN(+2.15),BTG3(-2.04),CACNA1F(-3.83),CALD1(+1.68),CAMK1D(+1.93),CAMK2B(+3.05),CAMKK2(+2.21),CD44(+3.93),CDK5R1(+2.97),CDKN1A(-2.32),CELSR2(-1.92),CHL1(+2.12),CHN1(-1.64),CHRNA3(+3.2…
Cancer,Organismal Injury and Abnormalities,Reproductive System Disease	Prostatic adenocarcinoma	6.07e-26			583	442	141	A2M(+4.05),ABCA12(+2.54),ABCC4(-2.19),ABCC5(+1.68),ABCC8(+4.12),ABCC9(+2.43),ACSL3(-1.86),ADAM9(-1.69),ADAMTS14(+3.43),ADAMTS19(+3.87),ADAMTS20(+2.39),ADAMTS5(+2.45),ADARB2(+3.39),ADCY1(+3.35),ADCY2(-1.72),ADCY8(+3.77),ADCYAP1(+4.25),ADD2(+2.03),AFF2(+2.21),AK5(+2.51),AKAP2(+2.04),AKAP6(+1.88),ALK(+3.89),ALOX15(-2.39),AMT(-1.62),AMZ2(-1.79),ANK2(+2.8),ANKRD1(-2.65),ANKS1B(+2.02),ANO4(+2.57),AP3B2…
Cell Morphology,Cellular Assembly and Organization,Cellular Development,Cellular Function and Maintenance,Cellular Growth and Proliferation,Nervous System Development and Function,Organismal Development,Tissue Development	Neuritogenesis	6.44e-26	Increased	4.65	181	153	28	A2M(+4.05),ADCY1(+3.35),ADCY3(+1.72),ADCYAP1(+4.25),ADGRB1(+2.1),AGER(-1.91),AHR(+3.68),ANGPT1(+5.6),APBA1(+2.1),ARHGAP33(+2.31),ASCL1(+5.3),ATL1(+2.14),ATP8A2(+2.14),BCL11B(+4.28),BOC(+1.7),BRSK1(-1.69),BRSK2(+2.27),BSN(+2.15),BTG3(-2.04),CACNA1F(-3.83),CALD1(+1.68),CAMK1D(+1.93),CAMK2B(+3.05),CAMKK2(+2.21),CD44(+3.93),CDK5R1(+2.97),CDKN1A(-2.32),CELSR2(-1.92),CHL1(+2.12),CHN1(-1.64),CHRNA3(+3.2…
Cellular Movement	Cell movement	6.69e-26	Increased	6.008	497	382	115	A2M(+4.05),ABCC4(-2.19),ACP5(-2.76),ADAM12(+3.56),ADAM9(-1.69),ADAMTS5(+2.45),ADARB1(+1.73),ADCY3(+1.72),ADCYAP1(+4.25),ADCYAP1R1(+5.81),ADD2(+2.03),ADGRB1(+2.1),ADGRG1(-1.62),ADIPOR1(-1.58),AFAP1(+2.7),AFAP1-AS1(+1.93),AGER(-1.91),AHR(+3.68),AIF1(-4.76),AJAP1(+2.43),ALCAM(+3.09),ALDOA(-1.51),ALK(+3.89),ALOX15(-2.39),AMOTL1(+1.8),ANGPT1(+5.6),ANGPTL2(+2.25),ANXA2(+1.65),APBA1(+2.1),APBA3(-1.67),A…
Endocrine System Disorders,Gastrointestinal Disease,Organismal Injury and Abnormalities	Pancreatic duct disorder	7.61e-26			428	334	94	ABCA12(+2.54),ABCC4(-2.19),ABCC9(+2.43),ABCD4(-1.52),ABTB2(+2.14),ACAP1(-2.03),ADAM12(+3.56),ADAMTS10(+3.13),ADAMTS17(+4.3),ADAMTS19(+3.87),ADAMTS20(+2.39),ADAMTS5(+2.45),ADAMTSL3(+10.28),ADARB2(+3.39),ADCY1(+3.35),ADCY8(+3.77),ADCYAP1(+4.25),ADCYAP1R1(+5.81),AFF2(+2.21),AFF3(+1.85),AJAP1(+2.43),ALDOA(-1.51),ALK(+3.89),AMOTL1(+1.8),ANGPT1(+5.6),ANK2(+2.8),ANKRD24(-3.32),ANKRD29(+2.61),AP3B2(+2.89…
Cellular Assembly and Organization,Cellular Function and Maintenance	Organization of cytoskeleton	7.66e-26	Increased	5.663	336	268	68	A2M(+4.05),ABCC4(-2.19),ABLIM1(+1.7),ABLIM3(+3.62),ACAP1(-2.03),ADAM12(+3.56),ADAMTS8(+1.83),ADCY1(+3.35),ADCY3(+1.72),ADCYAP1(+4.25),ADGRB1(+2.1),AFAP1(+2.7),AGER(-1.91),AHR(+3.68),AKAP2(+2.04),ALDOA(-1.51),ALOX15(-2.39),ANGPT1(+5.6),APBA1(+2.1),APC2(+1.78),APPL2(+1.69),AQP1(+2.14),ARF1(-1.49),ARHGAP20(+3.95),ARHGAP33(+2.31),ARRB1(+2.62),ARSB(+1.72),ASCL1(+5.3),ASPM(+2.11),ATL1(+2.14),ATP8A2(+2.…
Organismal Injury and Abnormalities	Benign lesion	9.62e-26		-1.875	245	196	49	ABCA8(+3.17),ABCC4(-2.19),ADAM12(+3.56),ADARB1(+1.73),ADCYAP1R1(+5.81),ADGRD1(-2.98),AFAP1(+2.7),AGER(-1.91),AHR(+3.68),ALCAM(+3.09),ALDOA(-1.51),ALDOC(-3.65),ALOX15(-2.39),ANGPT1(+5.6),ANGPTL2(+2.25),ANKH(+1.95),ANXA2(+1.65),ASCL1(+5.3),ASS1(+2.45),ATRNL1(+1.51),AXIN2(+3.19),BACE2(+1.84),BBC3(-1.77),BCL11B(+4.28),BIRC5(+2.19),BMP4(+1.85),BMP5(+3.06),BOK(+2.12),BRCA1(+1.77),BRINP1(+3.57),BRINP3(+…
Cancer,Endocrine System Disorders,Gastrointestinal Disease,Organismal Injury and Abnormalities	Pancreatic ductal carcinoma	1.1e-25			427	333	94	ABCA12(+2.54),ABCC4(-2.19),ABCC9(+2.43),ABCD4(-1.52),ABTB2(+2.14),ACAP1(-2.03),ADAM12(+3.56),ADAMTS10(+3.13),ADAMTS17(+4.3),ADAMTS19(+3.87),ADAMTS20(+2.39),ADAMTS5(+2.45),ADAMTSL3(+10.28),ADARB2(+3.39),ADCY1(+3.35),ADCY8(+3.77),ADCYAP1(+4.25),ADCYAP1R1(+5.81),AFF2(+2.21),AFF3(+1.85),AJAP1(+2.43),ALDOA(-1.51),ALK(+3.89),AMOTL1(+1.8),ANGPT1(+5.6),ANK2(+2.8),ANKRD24(-3.32),ANKRD29(+2.61),AP3B2(+2.89…
Cancer,Gastrointestinal Disease,Organismal Injury and Abnormalities	Gastric cancer	1.15e-25			332	263	69	A2M(+4.05),ABCA12(+2.54),ABCC4(-2.19),ABCC5(+1.68),ABCC8(+4.12),ABCC9(+2.43),ADAM12(+3.56),ADAM9(-1.69),ADAMTS10(+3.13),ADARB1(+1.73),ADCY2(-1.72),ADCY8(+3.77),AFF2(+2.21),AKAP2(+2.04),ALCAM(+3.09),AMT(-1.62),APBA1(+2.1),ARHGAP20(+3.95),ARHGEF40(+1.86),ASCL1(+5.3),ATP6V1C2(+4.46),ATP8A1(+3.33),ATP9A(+1.56),AUTS2(+3.63),AXIN2(+3.19),B4GALNT1(+3.19),BACE2(+1.84),BARHL1(+2.44),BCKDHA(-1.77),BHLHE22(…
Cancer,Organismal Injury and Abnormalities	Head and neck squamous cell carcinoma	1.41e-25			475	375	100	ABCA12(+2.54),ABCC5(+1.68),ABCC9(+2.43),ABLIM3(+3.62),ABTB2(+2.14),ACADL(+2.1),ACSL3(-1.86),ADAM12(+3.56),ADAM9(-1.69),ADAMTS14(+3.43),ADAMTS17(+4.3),ADAMTS19(+3.87),ADAMTS20(+2.39),ADAMTSL3(+10.28),ADARB1(+1.73),ADCY1(+3.35),ADCY8(+3.77),AFF3(+1.85),AK5(+2.51),AKAP6(+1.88),ALK(+3.89),ANKRD26(-1.77),ANKRD50(+1.66),ANKS1B(+2.02),ANO1(+5.01),APOL4(+2.77),ARHGAP28(+3.07),ARHGAP31(+4.04),ARX(-5.71),A…
Neurological Disease	Motor dysfunction or movement disorder	1.53e-25	Decreased	-3.526	279	200	79	A2M(+4.05),ACTN3(-4.12),ADCY2(-1.72),ADGRD1(-2.98),ANKH(+1.95),ANXA2(+1.65),APBA1(+2.1),AQP1(+2.14),ARRB1(+2.62),ARX(-5.71),ASCL1(+5.3),ATL1(+2.14),ATP1A3(+2.61),ATP1B1(-2.11),ATP1B2(-1.79),ATP8A2(+2.14),B4GALNT1(+3.19),BCHE(+2.65),BCL11B(+4.28),BHLHE22(+5.15),BRSK1(-1.69),BRSK2(+2.27),C4A/C4B(+2.69),CA4(-6.57),CACNA1B(-1.83),CACNA1C(+3.21),CACNA1F(-3.83),CACNA1G(+2.29),CACNA2D1(+3.79),CACNA2D3(+…
Nervous System Development and Function	Development of central nervous system	1.54e-25	Increased	3.074	186	145	41	ADCYAP1(+4.25),ADCYAP1R1(+5.81),ADGRB1(+2.1),ADGRG1(-1.62),AFF2(+2.21),AGER(-1.91),ALDH1A3(+3.21),ALK(+3.89),ANGPT1(+5.6),ARSB(+1.72),ARX(-5.71),ASCL1(+5.3),ASPM(+2.11),AXL(-1.57),BARHL1(+2.44),BHLHE22(+5.15),BMP4(+1.85),BMP5(+3.06),CBS/CBSL(+2.37),CDK5R1(+2.97),CDK5RAP3(-1.65),CDK6(+2.2),CDON(+1.56),CELSR2(-1.92),CEP290(-1.67),CHL1(+2.12),CHRNB2(+2.52),CNR1(+8.01),CNTN1(+3.34),COL2A1(+1.9),COL3A…
Cancer,Endocrine System Disorders,Gastrointestinal Disease,Organismal Injury and Abnormalities	Pancreatic adenocarcinoma	1.64e-25			433	336	97	ABCA12(+2.54),ABCC4(-2.19),ABCC9(+2.43),ABCD4(-1.52),ABTB2(+2.14),ACAP1(-2.03),ADAM12(+3.56),ADAMTS10(+3.13),ADAMTS17(+4.3),ADAMTS19(+3.87),ADAMTS20(+2.39),ADAMTS5(+2.45),ADAMTSL3(+10.28),ADARB2(+3.39),ADCY1(+3.35),ADCY8(+3.77),ADCYAP1(+4.25),ADCYAP1R1(+5.81),AFF2(+2.21),AFF3(+1.85),AJAP1(+2.43),ALDOA(-1.51),ALK(+3.89),AMOTL1(+1.8),ANGPT1(+5.6),ANK2(+2.8),ANKRD24(-3.32),ANKRD29(+2.61),AP3B2(+2.89…
Cell Death and Survival	Apoptosis	1.72e-25		-1.169	549	389	160	A2M(+4.05),ADAM12(+3.56),ADAMTS20(+2.39),ADARB1(+1.73),ADCY1(+3.35),ADCYAP1(+4.25),ADCYAP1R1(+5.81),ADIPOR1(-1.58),AFAP1-AS1(+1.93),AGER(-1.91),AHR(+3.68),AIF1(-4.76),ALCAM(+3.09),ALDH1A3(+3.21),ALDOA(-1.51),ALDOC(-3.65),ALK(+3.89),ALKBH5(-2.1),ALOX15(-2.39),AMIGO2(+3.9),AMOTL1(+1.8),ANG(-3.03),ANGPT1(+5.6),ANKRD1(-2.65),ANXA2(+1.65),APEX1(+1.71),AQP1(+2.14),ARF4(-2.49),ARRB1(+2.62),ARSB(+1.72),A…
Cancer,Organismal Injury and Abnormalities	Upper aero-digestive squamous cell carcinoma	1.99e-25			362	293	69	ABCA12(+2.54),ABCC5(+1.68),ABCC9(+2.43),ABLIM3(+3.62),ACSL3(-1.86),ADAM12(+3.56),ADAM9(-1.69),ADAMTS14(+3.43),ADAMTS17(+4.3),ADAMTS20(+2.39),ADAMTSL3(+10.28),ADARB1(+1.73),ADCY1(+3.35),AKAP6(+1.88),ALK(+3.89),ANKRD26(-1.77),ANKRD50(+1.66),ANKS1B(+2.02),ARHGAP28(+3.07),ARHGAP31(+4.04),ARX(-5.71),ASAP2(+1.65),ASPN(+14.68),ATF5(+2.66),ATP10A(+2.87),ATP1A3(+2.61),ATRNL1(+1.51),AUTS2(+3.63),AXL(-1.57)…
Neurological Disease	Movement Disorders	2.83e-25	Decreased	-3.054	275	197	78	A2M(+4.05),ACTN3(-4.12),ADCY2(-1.72),ADGRD1(-2.98),ANKH(+1.95),ANXA2(+1.65),APBA1(+2.1),AQP1(+2.14),ARRB1(+2.62),ARX(-5.71),ASCL1(+5.3),ATL1(+2.14),ATP1A3(+2.61),ATP1B1(-2.11),ATP1B2(-1.79),ATP8A2(+2.14),B4GALNT1(+3.19),BCHE(+2.65),BCL11B(+4.28),BHLHE22(+5.15),BRSK1(-1.69),BRSK2(+2.27),C4A/C4B(+2.69),CA4(-6.57),CACNA1B(-1.83),CACNA1C(+3.21),CACNA1F(-3.83),CACNA1G(+2.29),CACNA2D1(+3.79),CACNA2D3(+…
Cancer,Endocrine System Disorders,Gastrointestinal Disease,Organismal Injury and Abnormalities	Pancreatic ductal adenocarcinoma	3.01e-25			425	331	94	ABCA12(+2.54),ABCC4(-2.19),ABCC9(+2.43),ABCD4(-1.52),ABTB2(+2.14),ACAP1(-2.03),ADAM12(+3.56),ADAMTS10(+3.13),ADAMTS17(+4.3),ADAMTS19(+3.87),ADAMTS20(+2.39),ADAMTS5(+2.45),ADAMTSL3(+10.28),ADARB2(+3.39),ADCY1(+3.35),ADCY8(+3.77),ADCYAP1(+4.25),ADCYAP1R1(+5.81),AFF2(+2.21),AFF3(+1.85),AJAP1(+2.43),ALDOA(-1.51),ALK(+3.89),AMOTL1(+1.8),ANGPT1(+5.6),ANK2(+2.8),ANKRD24(-3.32),ANKRD29(+2.61),AP3B2(+2.89…
Cellular Development	Differentiation of nervous system	8.72e-25	Increased	3.751	153	130	23	ADCYAP1(+4.25),ALK(+3.89),ANGPT1(+5.6),ARX(-5.71),ASCL1(+5.3),ASPM(+2.11),ATF5(+2.66),BCHE(+2.65),BCL11B(+4.28),BHLHE22(+5.15),BMP4(+1.85),BRINP1(+3.57),BRINP2(+3.07),BRINP3(+6.4),BRSK1(-1.69),BRSK2(+2.27),CBLN1(+5.11),CDC25B(+2.16),CDH23(-1.49),CDK5R1(+2.97),CDK5RAP3(-1.65),CDON(+1.56),CHAF1A(+2.72),CNR1(+8.01),CNTN1(+3.34),CNTN2(+4.37),CNTN4(+3.64),CTDSP1(+2.19),CXCR4(+2.78),DAB1(+2.05),DDIT4(-…
Embryonic Development,Organismal Development	Development of body trunk	8.83e-25		1.788	292	214	78	ABCA12(+2.54),ADCYAP1(+4.25),AFAP1(+2.7),AGER(-1.91),AHR(+3.68),ALDH1A3(+3.21),ANGPT1(+5.6),ANKRD1(-2.65),ANXA2(+1.65),AQP1(+2.14),ARRB1(+2.62),ARSB(+1.72),ARX(-5.71),ASCL1(+5.3),AXL(-1.57),BBC3(-1.77),BCL11B(+4.28),BICC1(+4.24),BIRC5(+2.19),BMF(+1.59),BMP4(+1.85),BMP5(+3.06),BMPR2(+2.38),BRCA1(+1.77),BSX(+7.77),BTRC(+1.67),CACNA1C(+3.21),CBS/CBSL(+2.37),CCDC151(-2.08),CCL2(+2.16),CCN3(+4.98),CCN…
Cancer,Organismal Injury and Abnormalities	Ductal carcinoma	9.49e-25		-1.4	517	402	115	A2M(+4.05),ABCA12(+2.54),ABCC4(-2.19),ABCC9(+2.43),ABCD4(-1.52),ABTB2(+2.14),ACAP1(-2.03),ACP5(-2.76),ADAM12(+3.56),ADAMTS10(+3.13),ADAMTS17(+4.3),ADAMTS19(+3.87),ADAMTS20(+2.39),ADAMTS5(+2.45),ADAMTSL3(+10.28),ADARB2(+3.39),ADCY1(+3.35),ADCY8(+3.77),ADCYAP1(+4.25),ADCYAP1R1(+5.81),AFAP1-AS1(+1.93),AFF2(+2.21),AFF3(+1.85),AJAP1(+2.43),ALDOA(-1.51),ALK(+3.89),AMOTL1(+1.8),ANGPT1(+5.6),ANK2(+2.8),A…
Cancer,Organismal Injury and Abnormalities,Respiratory Disease	Non-small cell lung carcinoma	1.06e-24		-0.961	358	280	78	ABCA12(+2.54),ABCC5(+1.68),ADAM12(+3.56),ADAM9(-1.69),ADAMTS14(+3.43),ADCY2(-1.72),ADCYAP1R1(+5.81),ADIPOR1(-1.58),AFAP1-AS1(+1.93),AHR(+3.68),ALCAM(+3.09),ALDH1A3(+3.21),ALDOA(-1.51),ALDOC(-3.65),ALK(+3.89),ANGPT1(+5.6),ANK2(+2.8),ANKS1B(+2.02),ANO2(+4.77),ANXA2(+1.65),APEX1(+1.71),ARAP2(+1.94),ARHGAP33(+2.31),ARRB1(+2.62),ATP10A(+2.87),ATP1A3(+2.61),ATP1B1(-2.11),ATRNL1(+1.51),AXIN2(+3.19),AXL(…
Cell Death and Survival	Necrosis	1.61e-24		-0.722	548	402	146	A2M(+4.05),ABCC4(-2.19),ABCC8(+4.12),ABCC9(+2.43),ADAM12(+3.56),ADARB1(+1.73),ADCY1(+3.35),ADCYAP1(+4.25),ADCYAP1R1(+5.81),ADIPOR1(-1.58),AFAP1(+2.7),AFAP1-AS1(+1.93),AGER(-1.91),AHR(+3.68),ALCAM(+3.09),ALDOA(-1.51),ALK(+3.89),ALOX15(-2.39),AMIGO2(+3.9),AMOTL1(+1.8),ANG(-3.03),ANGPT1(+5.6),ANKRD1(-2.65),ANXA2(+1.65),APEX1(+1.71),ARRB1(+2.62),ARSB(+1.72),ASCL1(+5.3),ASS1(+2.45),ATF5(+2.66),AXL(-1.…
Cancer,Organismal Injury and Abnormalities,Reproductive System Disease	Mammary tumor	1.91e-24		1.46	489	368	121	ABCA8(+3.17),ABCC4(-2.19),ABCC5(+1.68),ABCC9(+2.43),ABLIM1(+1.7),ABLIM3(+3.62),ACBD3(-1.69),ACP5(-2.76),ADAM12(+3.56),ADAM9(-1.69),ADAMTS10(+3.13),ADAMTS14(+3.43),ADAMTS20(+2.39),ADAMTS5(+2.45),ADAMTS8(+1.83),ADARB2(+3.39),ADCY2(-1.72),ADCY3(+1.72),ADCYAP1(+4.25),ADGRD1(-2.98),AFF2(+2.21),AGER(-1.91),AKAP6(+1.88),ALDH1A3(+3.21),ALDOA(-1.51),ALDOC(-3.65),ALK(+3.89),ALOX15(-2.39),ANG(-3.03),ANGPTL2…
Cancer,Organismal Injury and Abnormalities,Reproductive System Disease	Endometrial adenocarcinoma	2.22e-24			494	400	94	ABCA12(+2.54),ABCA8(+3.17),ABCC8(+4.12),ABCC9(+2.43),ABCD4(-1.52),ABLIM3(+3.62),ACSL3(-1.86),ADAM9(-1.69),ADCY1(+3.35),ADCY2(-1.72),AFF2(+2.21),AJAP1(+2.43),AKAP6(+1.88),ALK(+3.89),ANK2(+2.8),ANKRD50(+1.66),ANKS1B(+2.02),ANO2(+4.77),ANO4(+2.57),AP3B2(+2.89),APLF(-2.7),APPL2(+1.69),ARAP2(+1.94),ARHGAP20(+3.95),ASPM(+2.11),ASPN(+14.68),ASTN2(+1.88),ATL1(+2.14),ATP10A(+2.87),ATP1B2(-1.79),ATP8A2(+2.…
Cellular Movement	Migration of cells	2.66e-24	Increased	5.587	449	344	105	A2M(+4.05),ABCC4(-2.19),ACP5(-2.76),ADAM12(+3.56),ADAM9(-1.69),ADARB1(+1.73),ADCY3(+1.72),ADCYAP1(+4.25),ADCYAP1R1(+5.81),ADD2(+2.03),ADGRB1(+2.1),ADGRG1(-1.62),ADIPOR1(-1.58),AFAP1(+2.7),AFAP1-AS1(+1.93),AGER(-1.91),AHR(+3.68),AIF1(-4.76),ALCAM(+3.09),ALDOA(-1.51),ALK(+3.89),ALOX15(-2.39),AMOTL1(+1.8),ANGPT1(+5.6),ANGPTL2(+2.25),ANXA2(+1.65),APBA1(+2.1),APBA3(-1.67),APPL2(+1.69),AQP1(+2.14),ARF1…
Cancer,Gastrointestinal Disease,Organismal Injury and Abnormalities	Gastric adenocarcinoma	3.31e-24			292	235	57	A2M(+4.05),ABCA12(+2.54),ABCC4(-2.19),ABCC5(+1.68),ABCC8(+4.12),ABCC9(+2.43),ADAMTS10(+3.13),ADARB1(+1.73),ADCY2(-1.72),ADCY8(+3.77),AFF2(+2.21),AKAP2(+2.04),AMT(-1.62),APBA1(+2.1),ARHGAP20(+3.95),ARHGEF40(+1.86),ASCL1(+5.3),ATP6V1C2(+4.46),ATP8A1(+3.33),ATP9A(+1.56),AUTS2(+3.63),AXIN2(+3.19),B4GALNT1(+3.19),BACE2(+1.84),BARHL1(+2.44),BCKDHA(-1.77),BHLHE22(+5.15),BMPR2(+2.38),BNC2(+3.43),BSN(+2.1…
Cancer,Organismal Injury and Abnormalities	Lymphohematopoietic neoplasia	4.66e-24		-0.467	606	455	151	ABCA12(+2.54),ABCC4(-2.19),ABCC9(+2.43),ACP5(-2.76),ADAM12(+3.56),ADAM9(-1.69),ADAMTS17(+4.3),ADAMTS5(+2.45),ADAMTSL3(+10.28),ADARB2(+3.39),ADCY1(+3.35),ADCY3(+1.72),ADCYAP1R1(+5.81),ADD2(+2.03),ADGRB1(+2.1),AFF3(+1.85),AHR(+3.68),AKAP2(+2.04),ALK(+3.89),ALOX15(-2.39),AMOTL1(+1.8),ANGPT1(+5.6),ANGPTL2(+2.25),ANK2(+2.8),ANKH(+1.95),ANKRD26(-1.77),ANKRD50(+1.66),ANKS1B(+2.02),ANO2(+4.77),ANO4(+2.57…
Cellular Assembly and Organization,Cellular Function and Maintenance	Organization of cytoplasm	6.04e-24	Increased	5.663	356	273	83	A2M(+4.05),ABCC4(-2.19),ABLIM1(+1.7),ABLIM3(+3.62),ACAP1(-2.03),ADAM12(+3.56),ADAMTS8(+1.83),ADCY1(+3.35),ADCY3(+1.72),ADCYAP1(+4.25),ADGRB1(+2.1),AFAP1(+2.7),AGER(-1.91),AHR(+3.68),AKAP2(+2.04),ALDOA(-1.51),ALOX15(-2.39),ANGPT1(+5.6),APBA1(+2.1),APC2(+1.78),APPL2(+1.69),AQP1(+2.14),ARF1(-1.49),ARHGAP20(+3.95),ARHGAP33(+2.31),ARL1(-1.97),ARRB1(+2.62),ARSB(+1.72),ASCL1(+5.3),ASPM(+2.11),ATL1(+2.14…
Cancer,Gastrointestinal Disease,Organismal Injury and Abnormalities	Gastric carcinoma	6.05e-24			302	243	59	A2M(+4.05),ABCA12(+2.54),ABCC4(-2.19),ABCC5(+1.68),ABCC8(+4.12),ABCC9(+2.43),ADAM9(-1.69),ADAMTS10(+3.13),ADARB1(+1.73),ADCY2(-1.72),ADCY8(+3.77),AFF2(+2.21),AKAP2(+2.04),ALCAM(+3.09),AMT(-1.62),APBA1(+2.1),ARHGAP20(+3.95),ARHGEF40(+1.86),ASCL1(+5.3),ATP6V1C2(+4.46),ATP8A1(+3.33),ATP9A(+1.56),AUTS2(+3.63),AXIN2(+3.19),B4GALNT1(+3.19),BACE2(+1.84),BARHL1(+2.44),BCKDHA(-1.77),BHLHE22(+5.15),BIRC5(+…
Cancer,Organismal Injury and Abnormalities	Endometrioid carcinoma	8.77e-24			572	450	122	ABCA12(+2.54),ABCA8(+3.17),ABCC4(-2.19),ABCC8(+4.12),ABCC9(+2.43),ABCD4(-1.52),ABLIM3(+3.62),ACSL3(-1.86),ADAM9(-1.69),ADAMTS10(+3.13),ADAMTS20(+2.39),ADCY1(+3.35),ADCY2(-1.72),ADCYAP1R1(+5.81),ADD2(+2.03),AFF2(+2.21),AFF3(+1.85),AIF1(-4.76),AJAP1(+2.43),AKAP6(+1.88),AMOTL1(+1.8),ANK2(+2.8),ANKRD24(-3.32),ANKRD50(+1.66),ANKS1B(+2.02),ANO2(+4.77),ANO4(+2.57),AOPEP(+1.65),AP3B2(+2.89),APLF(-2.7),AP…
Cellular Assembly and Organization,Cellular Function and Maintenance	Microtubule dynamics	1.02e-23	Increased	5.447	292	232	60	A2M(+4.05),ABCC4(-2.19),ABLIM1(+1.7),ABLIM3(+3.62),ACAP1(-2.03),ADCY1(+3.35),ADCY3(+1.72),ADCYAP1(+4.25),ADGRB1(+2.1),AGER(-1.91),AHR(+3.68),ALOX15(-2.39),ANGPT1(+5.6),APBA1(+2.1),APC2(+1.78),APPL2(+1.69),AQP1(+2.14),ARHGAP20(+3.95),ARHGAP33(+2.31),ARRB1(+2.62),ARSB(+1.72),ASCL1(+5.3),ATL1(+2.14),ATP8A2(+2.14),AUTS2(+3.63),AXL(-1.57),BCL11B(+4.28),BIRC5(+2.19),BMP4(+1.85),BOC(+1.7),BRCA1(+1.77),B…
Cancer,Hematological Disease,Organismal Injury and Abnormalities	Hematopoietic neoplasm	2.72e-23		-0.956	600	451	149	ABCA12(+2.54),ABCC4(-2.19),ABCC9(+2.43),ACP5(-2.76),ADAM12(+3.56),ADAM9(-1.69),ADAMTS17(+4.3),ADAMTS5(+2.45),ADAMTSL3(+10.28),ADARB2(+3.39),ADCY1(+3.35),ADCY3(+1.72),ADCYAP1R1(+5.81),ADD2(+2.03),ADGRB1(+2.1),AFF3(+1.85),AHR(+3.68),AKAP2(+2.04),ALK(+3.89),ALOX15(-2.39),AMOTL1(+1.8),ANGPT1(+5.6),ANGPTL2(+2.25),ANK2(+2.8),ANKH(+1.95),ANKRD26(-1.77),ANKRD50(+1.66),ANKS1B(+2.02),ANO2(+4.77),ANO4(+2.57…
Cell-To-Cell Signaling and Interaction,Nervous System Development and Function	Neurotransmission	9.59e-23	Increased	2.306	129	114	15	ADARB1(+1.73),ADCY1(+3.35),ADCY8(+3.77),ALK(+3.89),ANKS1B(+2.02),APBA1(+2.1),APBA3(-1.67),BCHE(+2.65),BSN(+2.15),CACNA1B(-1.83),CACNA1C(+3.21),CACNA1G(+2.29),CACNA2D3(+5.28),CALM1 (includes others)(+1.49),CBLN1(+5.11),CCL2(+2.16),CD44(+3.93),CHRM2(+1.92),CHRM3(+2.33),CHRNA3(+3.24),CHRNA5(+2.29),CHRNA7(+1.94),CHRNB2(+2.52),CNR1(+8.01),CPLX2(+1.98),DHCR7(-1.88),DRD4(-3.01),EPHB1(+2.81),FGF14(+2.35)…
Cell Morphology,Cellular Assembly and Organization,Cellular Function and Maintenance	Formation of cellular protrusions	9.67e-23	Increased	6.294	236	193	43	A2M(+4.05),ABCC4(-2.19),ABLIM1(+1.7),ABLIM3(+3.62),ACAP1(-2.03),ADCY1(+3.35),ADCY3(+1.72),ADCYAP1(+4.25),ADGRB1(+2.1),AGER(-1.91),AHR(+3.68),ANGPT1(+5.6),APBA1(+2.1),APPL2(+1.69),AQP1(+2.14),ARHGAP33(+2.31),ARRB1(+2.62),ASCL1(+5.3),ATL1(+2.14),ATP8A2(+2.14),AUTS2(+3.63),BCL11B(+4.28),BOC(+1.7),BRSK1(-1.69),BRSK2(+2.27),BSN(+2.15),BTG3(-2.04),CACNA1F(-3.83),CALD1(+1.68),CAMK1D(+1.93),CAMK2B(+3.05)…
Cancer,Organismal Injury and Abnormalities	Lymphohematopoietic cancer	1.01e-22		-0.573	594	445	149	ABCA12(+2.54),ABCC9(+2.43),ACP5(-2.76),ADAM12(+3.56),ADAM9(-1.69),ADAMTS17(+4.3),ADAMTS5(+2.45),ADAMTSL3(+10.28),ADARB2(+3.39),ADCY1(+3.35),ADCY3(+1.72),ADCYAP1R1(+5.81),ADD2(+2.03),ADGRB1(+2.1),AFF3(+1.85),AHR(+3.68),AKAP2(+2.04),ALK(+3.89),ALOX15(-2.39),AMOTL1(+1.8),ANGPT1(+5.6),ANGPTL2(+2.25),ANK2(+2.8),ANKH(+1.95),ANKRD26(-1.77),ANKRD50(+1.66),ANKS1B(+2.02),ANO2(+4.77),ANO4(+2.57),ANXA2(+1.65…
Embryonic Development,Nervous System Development and Function,Organ Development,Organismal Development,Tissue Development	Formation of brain	1.52e-22	Increased	2.562	150	112	38	ADCYAP1(+4.25),ADCYAP1R1(+5.81),ADGRB1(+2.1),ADGRG1(-1.62),AFF2(+2.21),ALDH1A3(+3.21),ALK(+3.89),ARX(-5.71),ASCL1(+5.3),ASPM(+2.11),AXL(-1.57),BARHL1(+2.44),BHLHE22(+5.15),BMP4(+1.85),BMP5(+3.06),CBS/CBSL(+2.37),CDK5R1(+2.97),CDK5RAP3(-1.65),CDK6(+2.2),CDON(+1.56),CELSR2(-1.92),CEP290(-1.67),CHL1(+2.12),CHRNB2(+2.52),CNR1(+8.01),CNTN1(+3.34),COL2A1(+1.9),COL3A1(+8.18),CRELD1(-2.41),CTNNBIP1(+1.87…
Cancer,Endocrine System Disorders,Organismal Injury and Abnormalities,Reproductive System Disease	Gonadal tumor	2.19e-22		0.246	385	293	92	ABCA12(+2.54),ABCA8(+3.17),ABCC4(-2.19),ABCC8(+4.12),ACP5(-2.76),ACRBP(-2.32),ADAMTS10(+3.13),ADAMTS19(+3.87),ADAMTS20(+2.39),ADAMTSL3(+10.28),ADCY1(+3.35),ADCY2(-1.72),ADCYAP1R1(+5.81),ADD2(+2.03),AFF3(+1.85),AIF1(-4.76),AKAP2(+2.04),AKAP6(+1.88),ALCAM(+3.09),ALKBH7(-1.81),AMOTL1(+1.8),ANG(-3.03),ANGPT1(+5.6),ANKRD24(-3.32),ANKRD50(+1.66),AOPEP(+1.65),APCDD1(+15.97),ARHGEF40(+1.86),ASPM(+2.11),A…
Organismal Survival	Perinatal death	2.61e-22	Decreased	-7.882	160	131	29	ABCA12(+2.54),ADAM12(+3.56),ADAM9(-1.69),AKAP6(+1.88),ALDH1A3(+3.21),APBA1(+2.1),APBA3(-1.67),ARRB1(+2.62),ASCL1(+5.3),ASS1(+2.45),ATP1A3(+2.61),BCL11A(+3.04),BCL11B(+4.28),BMP1(+1.86),BMP4(+1.85),BMPER(+5.67),BMPR2(+2.38),BRCA1(+1.77),BRSK1(-1.69),BRSK2(+2.27),CADPS(+1.95),CD44(+3.93),CDK5R1(+2.97),CDK6(+2.2),CDKN1A(-2.32),CDON(+1.56),CEBPD(+2.36),CLDN1(+1.7),COL25A1(+3.53),COL2A1(+1.9),CPLX2(+1…
Cancer,Organismal Injury and Abnormalities	Connective or soft tissue tumor	2.86e-22		0.89	332	262	70	ABCA12(+2.54),ABCA8(+3.17),ABCC4(-2.19),ABCC5(+1.68),ACP5(-2.76),ADAM12(+3.56),ADAM9(-1.69),ADAMTS5(+2.45),ADAMTSL3(+10.28),ADARB1(+1.73),ADARB2(+3.39),AGER(-1.91),AHR(+3.68),AKAP6(+1.88),ALDH1A3(+3.21),ALDOA(-1.51),ALK(+3.89),ANGPT1(+5.6),ANKRD26(-1.77),ANO1(+5.01),AP3B2(+2.89),ASPN(+14.68),ASS1(+2.45),ATL3(+1.78),ATP8A2(+2.14),ATP9A(+1.56),ATRNL1(+1.51),AXIN2(+3.19),BIRC5(+2.19),BMP4(+1.85),BMP…
Cancer,Hematological Disease,Organismal Injury and Abnormalities	Hematologic cancer	4.84e-22		-1.367	588	441	147	ABCA12(+2.54),ABCC9(+2.43),ACP5(-2.76),ADAM12(+3.56),ADAM9(-1.69),ADAMTS17(+4.3),ADAMTS5(+2.45),ADAMTSL3(+10.28),ADARB2(+3.39),ADCY1(+3.35),ADCY3(+1.72),ADCYAP1R1(+5.81),ADD2(+2.03),ADGRB1(+2.1),AFF3(+1.85),AHR(+3.68),AKAP2(+2.04),ALK(+3.89),ALOX15(-2.39),AMOTL1(+1.8),ANGPT1(+5.6),ANGPTL2(+2.25),ANK2(+2.8),ANKH(+1.95),ANKRD26(-1.77),ANKRD50(+1.66),ANKS1B(+2.02),ANO2(+4.77),ANO4(+2.57),ANXA2(+1.65…
Cellular Development,Nervous System Development and Function,Tissue Development	Differentiation of neurons	8.8e-22	Increased	3.966	127	104	23	ADCYAP1(+4.25),ALK(+3.89),ARX(-5.71),ASCL1(+5.3),ASPM(+2.11),ATF5(+2.66),BCHE(+2.65),BCL11B(+4.28),BHLHE22(+5.15),BMP4(+1.85),BRINP1(+3.57),BRINP2(+3.07),BRINP3(+6.4),BRSK1(-1.69),BRSK2(+2.27),CBLN1(+5.11),CDH23(-1.49),CDK5R1(+2.97),CDK5RAP3(-1.65),CDON(+1.56),CHAF1A(+2.72),CNR1(+8.01),CNTN2(+4.37),CNTN4(+3.64),CTDSP1(+2.19),DAB1(+2.05),DDIT4(-1.74),DISP1(+1.61),DISP3(+2.54),DLL1(-2.54),DLX2(+2.7…
Cancer,Organismal Injury and Abnormalities	Lymphoid cancer	9.28e-22		-1.592	392	290	102	ABCC9(+2.43),ACP5(-2.76),ADAM12(+3.56),ADAM9(-1.69),ADAMTSL3(+10.28),ADARB2(+3.39),ADCY3(+1.72),ADD2(+2.03),ADGRB1(+2.1),AHR(+3.68),ALK(+3.89),AMOTL1(+1.8),ANK2(+2.8),ANKH(+1.95),ANKRD50(+1.66),ANXA2(+1.65),APBA1(+2.1),APBA3(-1.67),ARHGAP33(+2.31),ASAP2(+1.65),ATP10A(+2.87),ATP1B1(-2.11),ATRNL1(+1.51),AXL(-1.57),BACH2(+1.83),BBC3(-1.77),BCHE(+2.65),BCL11A(+3.04),BCL11B(+4.28),BICC1(+4.24),BIRC5(+…
Nervous System Development and Function	Sensory system development	1.09e-21	Increased	2.321	143	113	30	ADAM9(-1.69),ADCY1(+3.35),ADCYAP1(+4.25),AGPAT3(+1.58),ALDH1A3(+3.21),ALOX15(-2.39),AQP1(+2.14),ARSB(+1.72),ASCL1(+5.3),ATP1B2(-1.79),ATP8A2(+2.14),BMP4(+1.85),BMPR1B(-2.97),BOC(+1.7),CACNA1F(-3.83),CBS/CBSL(+2.37),CCL2(+2.16),CDHR1(+2.89),CDK20(-1.81),CDKN1A(-2.32),CEP290(-1.67),CFH(+16.28),CLIC4(+1.64),CNGA3(+5.89),COL1A1(+3.04),COL2A1(+1.9),COL5A1(+2.19),COL8A2(+5.86),CPAMD8(+1.7),CRX(+5.29),C…
Neurological Disease,Organismal Injury and Abnormalities	Seizure disorder	1.42e-21	Decreased	-4.381	149	125	24	ABCC5(+1.68),ABCC8(+4.12),ADARB1(+1.73),ADCYAP1(+4.25),AOPEP(+1.65),AP3B2(+2.89),ARX(-5.71),ATP1A3(+2.61),B4GALNT1(+3.19),BBC3(-1.77),BSN(+2.15),C11orf96(+3.38),C4A/C4B(+2.69),CA4(-6.57),CACNA1B(-1.83),CACNA1C(+3.21),CACNA1G(+2.29),CACNA2D1(+3.79),CACNA2D3(+5.28),CACNA2D4(+4.85),CACNG4(+1.92),CDH23(-1.49),CDK5R1(+2.97),CDKN1A(-2.32),CEBPD(+2.36),CELF4(+2.54),CEMIP(+3.39),CHGB(+5.21),CHN1(-1.64),C…
Cancer,Organismal Injury and Abnormalities,Respiratory Disease	Nonsquamous non-small cell lung carcinoma	1.64e-21		-1.225	280	227	53	ABCA12(+2.54),ABCC5(+1.68),ADAMTS14(+3.43),ADCY2(-1.72),ADCYAP1R1(+5.81),AHR(+3.68),ALDH1A3(+3.21),ALDOA(-1.51),ALDOC(-3.65),ALK(+3.89),ANGPT1(+5.6),ANK2(+2.8),ANKS1B(+2.02),ANO2(+4.77),ARAP2(+1.94),ARHGAP33(+2.31),ARRB1(+2.62),ATP10A(+2.87),ATRNL1(+1.51),AXIN2(+3.19),AXL(-1.57),BACE2(+1.84),BCHE(+2.65),BCL11A(+3.04),BRCA1(+1.77),BRIP1(+2.46),BSN(+2.15),BUB1B(+1.96),C3orf70(+4.68),CACNA1C(+3.21),…
Cancer,Organismal Injury and Abnormalities,Reproductive System Disease	Uterine endometrioid carcinoma	1.74e-21			471	381	90	ABCA12(+2.54),ABCA8(+3.17),ABCC8(+4.12),ABCC9(+2.43),ABCD4(-1.52),ABLIM3(+3.62),ACSL3(-1.86),ADAM9(-1.69),ADCY1(+3.35),ADCY2(-1.72),AFF2(+2.21),AJAP1(+2.43),AKAP6(+1.88),ANK2(+2.8),ANKRD50(+1.66),ANKS1B(+2.02),ANO2(+4.77),ANO4(+2.57),AP3B2(+2.89),APLF(-2.7),APPL2(+1.69),ARAP2(+1.94),ARHGAP20(+3.95),ASPM(+2.11),ASPN(+14.68),ASTN2(+1.88),ATL1(+2.14),ATP10A(+2.87),ATP1B2(-1.79),ATP8A2(+2.14),ATP9A(+…
Cancer,Organismal Injury and Abnormalities	Lymphatic system tumor	1.9e-21		-1.366	396	291	105	ABCC9(+2.43),ACP5(-2.76),ADAM12(+3.56),ADAM9(-1.69),ADAMTSL3(+10.28),ADARB2(+3.39),ADCY3(+1.72),ADD2(+2.03),ADGRB1(+2.1),AHR(+3.68),ALK(+3.89),AMOTL1(+1.8),ANK2(+2.8),ANKH(+1.95),ANKRD26(-1.77),ANKRD50(+1.66),ANXA2(+1.65),APBA1(+2.1),APBA3(-1.67),ARHGAP33(+2.31),ASAP2(+1.65),ATP10A(+2.87),ATP1B1(-2.11),ATRNL1(+1.51),AXL(-1.57),BACH2(+1.83),BBC3(-1.77),BCHE(+2.65),BCL11A(+3.04),BCL11B(+4.28),BICC1…
Cancer,Endocrine System Disorders,Organismal Injury and Abnormalities,Reproductive System Disease	Ovarian tumor	3.43e-21		-0.466	370	282	88	ABCA12(+2.54),ABCA8(+3.17),ABCC4(-2.19),ABCC8(+4.12),ACP5(-2.76),ACRBP(-2.32),ADAMTS10(+3.13),ADAMTS19(+3.87),ADAMTS20(+2.39),ADAMTSL3(+10.28),ADCY1(+3.35),ADCY2(-1.72),ADCYAP1R1(+5.81),ADD2(+2.03),AFF3(+1.85),AIF1(-4.76),AKAP2(+2.04),AKAP6(+1.88),ALCAM(+3.09),ALKBH7(-1.81),AMOTL1(+1.8),ANG(-3.03),ANGPT1(+5.6),ANKRD24(-3.32),ANKRD50(+1.66),AOPEP(+1.65),APCDD1(+15.97),ARHGEF40(+1.86),ASPM(+2.11),A…
Cancer,Organismal Injury and Abnormalities	Benign solid tumor	3.68e-21		-1.565	211	169	42	ABCA8(+3.17),ABCC4(-2.19),ADAM12(+3.56),ADARB1(+1.73),ADCYAP1R1(+5.81),ADGRD1(-2.98),AGER(-1.91),AHR(+3.68),ALCAM(+3.09),ALDOA(-1.51),ALDOC(-3.65),ALOX15(-2.39),ANGPT1(+5.6),ANGPTL2(+2.25),ANKH(+1.95),ANXA2(+1.65),ASS1(+2.45),ATRNL1(+1.51),AXIN2(+3.19),BACE2(+1.84),BBC3(-1.77),BIRC5(+2.19),BMP4(+1.85),BMP5(+3.06),BOK(+2.12),BRINP3(+6.4),BTRC(+1.67),BUB1B(+1.96),CAMK2B(+3.05),CBX7(-1.96),CCDC80(+1…
Cancer,Organismal Injury and Abnormalities	Benign Tumors	4.87e-21		-1.565	212	169	43	ABCA8(+3.17),ABCC4(-2.19),ADAM12(+3.56),ADARB1(+1.73),ADCYAP1R1(+5.81),ADGRD1(-2.98),AGER(-1.91),AHR(+3.68),ALCAM(+3.09),ALDOA(-1.51),ALDOC(-3.65),ALOX15(-2.39),ANGPT1(+5.6),ANGPTL2(+2.25),ANKH(+1.95),ANXA2(+1.65),ASS1(+2.45),ATRNL1(+1.51),AXIN2(+3.19),BACE2(+1.84),BBC3(-1.77),BIRC5(+2.19),BMP4(+1.85),BMP5(+3.06),BOK(+2.12),BRINP3(+6.4),BTRC(+1.67),BUB1B(+1.96),CAMK2B(+3.05),CBX7(-1.96),CCDC80(+1…
Cancer,Organismal Injury and Abnormalities,Respiratory Disease	Lung adenocarcinoma	5.13e-21		-1.225	277	226	51	ABCA12(+2.54),ABCC5(+1.68),ADAMTS14(+3.43),ADCY2(-1.72),ADCYAP1R1(+5.81),AHR(+3.68),ALDH1A3(+3.21),ALDOA(-1.51),ALDOC(-3.65),ALK(+3.89),ANGPT1(+5.6),ANK2(+2.8),ANKS1B(+2.02),ANO2(+4.77),ARAP2(+1.94),ARHGAP33(+2.31),ARRB1(+2.62),ATP10A(+2.87),ATRNL1(+1.51),AXIN2(+3.19),BACE2(+1.84),BCHE(+2.65),BCL11A(+3.04),BRCA1(+1.77),BRIP1(+2.46),BSN(+2.15),BUB1B(+1.96),C3orf70(+4.68),CACNA1C(+3.21),CACNA1E(+4.…
Cancer,Organismal Injury and Abnormalities,Respiratory Disease	Development of lung carcinoma	5.26e-21		-0.951	278	226	52	ABCA12(+2.54),ABCC5(+1.68),ADAMTS14(+3.43),ADCY2(-1.72),ADCYAP1R1(+5.81),AHR(+3.68),ALDH1A3(+3.21),ALDOA(-1.51),ALDOC(-3.65),ALK(+3.89),ANGPT1(+5.6),ANK2(+2.8),ANKS1B(+2.02),ANO2(+4.77),ARAP2(+1.94),ARHGAP33(+2.31),ARRB1(+2.62),ATP10A(+2.87),ATRNL1(+1.51),AXIN2(+3.19),BACE2(+1.84),BCHE(+2.65),BCL11A(+3.04),BRCA1(+1.77),BRIP1(+2.46),BSN(+2.15),BUB1B(+1.96),C3orf70(+4.68),CACNA1C(+3.21),CACNA1E(+4.…
Cancer,Organismal Injury and Abnormalities,Reproductive System Disease	Endometrioid endometrial adenocarcinoma	5.77e-21			463	376	87	ABCA12(+2.54),ABCA8(+3.17),ABCC8(+4.12),ABCC9(+2.43),ABCD4(-1.52),ABLIM3(+3.62),ACSL3(-1.86),ADAM9(-1.69),ADCY1(+3.35),ADCY2(-1.72),AFF2(+2.21),AJAP1(+2.43),AKAP6(+1.88),ANK2(+2.8),ANKRD50(+1.66),ANKS1B(+2.02),ANO2(+4.77),ANO4(+2.57),AP3B2(+2.89),APLF(-2.7),APPL2(+1.69),ARAP2(+1.94),ARHGAP20(+3.95),ASPM(+2.11),ASPN(+14.68),ASTN2(+1.88),ATL1(+2.14),ATP10A(+2.87),ATP1B2(-1.79),ATP8A2(+2.14),ATP9A(+…
Hematological Disease,Immunological Disease	Lymphoproliferative disorder	7.77e-21	Decreased	-2.368	386	285	101	ABCC9(+2.43),ACP5(-2.76),ADAM9(-1.69),ADAMTSL3(+10.28),ADARB2(+3.39),ADCY3(+1.72),ADD2(+2.03),ADGRB1(+2.1),AGER(-1.91),AHR(+3.68),ALK(+3.89),AMOTL1(+1.8),ANK2(+2.8),ANKH(+1.95),ANKRD50(+1.66),ANXA2(+1.65),APBA1(+2.1),APBA3(-1.67),ARHGAP33(+2.31),ASAP2(+1.65),ATP10A(+2.87),ATP1B1(-2.11),ATRNL1(+1.51),AXL(-1.57),BACH2(+1.83),BBC3(-1.77),BCHE(+2.65),BCL11A(+3.04),BCL11B(+4.28),BICC1(+4.24),BIRC5(+2.…
Cancer,Hematological Disease,Organismal Injury and Abnormalities	Lymphocytic neoplasm	8.44e-21	Decreased	-2.754	385	284	101	ABCC9(+2.43),ACP5(-2.76),ADAM9(-1.69),ADAMTSL3(+10.28),ADARB2(+3.39),ADCY3(+1.72),ADD2(+2.03),ADGRB1(+2.1),AHR(+3.68),ALK(+3.89),AMOTL1(+1.8),ANK2(+2.8),ANKH(+1.95),ANKRD26(-1.77),ANKRD50(+1.66),ANXA2(+1.65),APBA1(+2.1),APBA3(-1.67),ARHGAP33(+2.31),ASAP2(+1.65),ATP10A(+2.87),ATP1B1(-2.11),ATRNL1(+1.51),AXL(-1.57),BACH2(+1.83),BBC3(-1.77),BCHE(+2.65),BCL11A(+3.04),BCL11B(+4.28),BICC1(+4.24),BIRC5(…
Cancer,Organismal Injury and Abnormalities	Connective tissue tumor	8.94e-21		0.827	292	231	61	ABCA12(+2.54),ABCC4(-2.19),ABCC5(+1.68),ACP5(-2.76),ADAM9(-1.69),ADAMTS5(+2.45),ADAMTSL3(+10.28),ADARB2(+3.39),AGER(-1.91),AKAP6(+1.88),ALDH1A3(+3.21),ALK(+3.89),ANGPT1(+5.6),ANKRD26(-1.77),AP3B2(+2.89),ASPN(+14.68),ASS1(+2.45),ATL3(+1.78),ATP8A2(+2.14),AXIN2(+3.19),BIRC5(+2.19),BMP4(+1.85),BRCA1(+1.77),BSN(+2.15),BUB1B(+1.96),C3orf52(+2.26),CACNA1B(-1.83),CACNA1E(+4.04),CACNA1G(+2.29),CACNA2D1(+…
Cancer,Hematological Disease,Immunological Disease,Organismal Injury and Abnormalities	Neoplasia of leukocytes	1.02e-20	Decreased	-2.713	385	285	100	ABCC9(+2.43),ACP5(-2.76),ADAM9(-1.69),ADAMTSL3(+10.28),ADARB2(+3.39),ADCY3(+1.72),ADD2(+2.03),ADGRB1(+2.1),AHR(+3.68),ALK(+3.89),AMOTL1(+1.8),ANK2(+2.8),ANKH(+1.95),ANKRD50(+1.66),ANXA2(+1.65),APBA1(+2.1),APBA3(-1.67),ARHGAP33(+2.31),ASAP2(+1.65),ATP10A(+2.87),ATP1B1(-2.11),ATRNL1(+1.51),AXL(-1.57),BACH2(+1.83),BBC3(-1.77),BCHE(+2.65),BCL11A(+3.04),BCL11B(+4.28),BICC1(+4.24),BIRC5(+2.19),BMF(+1.5…
Cancer,Organismal Injury and Abnormalities,Respiratory Disease	Development of respiratory system tumor	1.07e-20		-0.317	281	228	53	ABCA12(+2.54),ABCC5(+1.68),ADAMTS14(+3.43),ADCY2(-1.72),ADCYAP1R1(+5.81),AHR(+3.68),ALDH1A3(+3.21),ALDOA(-1.51),ALDOC(-3.65),ALK(+3.89),ANGPT1(+5.6),ANK2(+2.8),ANKS1B(+2.02),ANO2(+4.77),ARAP2(+1.94),ARHGAP33(+2.31),ARRB1(+2.62),ATP10A(+2.87),ATRNL1(+1.51),AXIN2(+3.19),BACE2(+1.84),BCHE(+2.65),BCL11A(+3.04),BRCA1(+1.77),BRIP1(+2.46),BSN(+2.15),BUB1B(+1.96),C3orf70(+4.68),CACNA1C(+3.21),CACNA1E(+4.…
Cellular Development,Connective Tissue Development and Function,Tissue Development	Differentiation of connective tissue cells	2.74e-20		1.442	168	130	38	A2M(+4.05),AGER(-1.91),AHR(+3.68),ANKRD26(-1.77),ASCL1(+5.3),ATF5(+2.66),ATRAID(-1.69),AXIN2(+3.19),BMP3(+3.85),BMP4(+1.85),BMPER(+5.67),BMPR1B(-2.97),BMPR2(+2.38),BNIP3(-1.92),BSCL2(-1.53),C1QL4(+4.27),CCDC3(+6.75),CCL2(+2.16),CCN3(+4.98),CCN4(+3.55),CD44(+3.93),CDK6(+2.2),CDKN1A(-2.32),CEBPD(+2.36),COL2A1(+1.9),CREB3L2(+1.81),CTNNBIP1(+1.87),CYP27B1(-2.51),DACT1(+2.82),DDIT3(-2.04),DDR2(+4.69),…
Neurological Disease,Organismal Injury and Abnormalities	Seizures	2.8e-20	Decreased	-4.627	132	113	19	ABCC8(+4.12),ADARB1(+1.73),ADCYAP1(+4.25),AOPEP(+1.65),AP3B2(+2.89),ARX(-5.71),ATP1A3(+2.61),B4GALNT1(+3.19),BBC3(-1.77),BSN(+2.15),C11orf96(+3.38),C4A/C4B(+2.69),CA4(-6.57),CACNA1B(-1.83),CACNA1G(+2.29),CACNA2D1(+3.79),CACNA2D3(+5.28),CACNA2D4(+4.85),CACNG4(+1.92),CDH23(-1.49),CDK5R1(+2.97),CDKN1A(-2.32),CEBPD(+2.36),CELF4(+2.54),CEMIP(+3.39),CHGB(+5.21),CHN1(-1.64),CHRNA5(+2.29),CHRNA7(+1.94),C…
Tissue Morphology	Quantity of cells	3.31e-20	Increased	5.976	387	277	110	A2M(+4.05),ADAM12(+3.56),ADAM9(-1.69),ADCYAP1(+4.25),ADD2(+2.03),AGER(-1.91),AHR(+3.68),ALCAM(+3.09),ALK(+3.89),ALOX15(-2.39),ANG(-3.03),ANGPT1(+5.6),AQP1(+2.14),ARF1(-1.49),ARSB(+1.72),ARX(-5.71),ASCL1(+5.3),ATP8A2(+2.14),AXL(-1.57),B4GALNT1(+3.19),BACH2(+1.83),BBC3(-1.77),BCL11A(+3.04),BCL11B(+4.28),BIRC5(+2.19),BMF(+1.59),BMP4(+1.85),BMPR1B(-2.97),BMPR2(+2.38),BOC(+1.7),BRCA1(+1.77),BRINP1(+3.…
Cancer,Organismal Injury and Abnormalities,Respiratory Disease	Development of lung tumor	3.64e-20		-0.499	279	226	53	ABCA12(+2.54),ABCC5(+1.68),ADAMTS14(+3.43),ADCY2(-1.72),ADCYAP1R1(+5.81),AHR(+3.68),ALDH1A3(+3.21),ALDOA(-1.51),ALDOC(-3.65),ALK(+3.89),ANGPT1(+5.6),ANK2(+2.8),ANKS1B(+2.02),ANO2(+4.77),ARAP2(+1.94),ARHGAP33(+2.31),ARRB1(+2.62),ATP10A(+2.87),ATRNL1(+1.51),AXIN2(+3.19),BACE2(+1.84),BCHE(+2.65),BCL11A(+3.04),BRCA1(+1.77),BRIP1(+2.46),BSN(+2.15),BUB1B(+1.96),C3orf70(+4.68),CACNA1C(+3.21),CACNA1E(+4.…
Cancer,Endocrine System Disorders,Organismal Injury and Abnormalities,Reproductive System Disease	Ovarian cancer	4.31e-20			359	274	85	ABCA12(+2.54),ABCA8(+3.17),ABCC4(-2.19),ABCC8(+4.12),ACP5(-2.76),ACRBP(-2.32),ADAMTS10(+3.13),ADAMTS19(+3.87),ADAMTS20(+2.39),ADAMTSL3(+10.28),ADCY1(+3.35),ADCY2(-1.72),ADCYAP1R1(+5.81),ADD2(+2.03),AFF3(+1.85),AIF1(-4.76),AKAP2(+2.04),AKAP6(+1.88),ALCAM(+3.09),ALKBH7(-1.81),AMOTL1(+1.8),ANG(-3.03),ANGPT1(+5.6),ANKRD24(-3.32),ANKRD50(+1.66),AOPEP(+1.65),APCDD1(+15.97),ARHGEF40(+1.86),ASPM(+2.11),A…
Nervous System Development and Function	Morphology of central nervous system	5.03e-20			161	119	42	ADCY1(+3.35),ADCY3(+1.72),ADCYAP1(+4.25),ALK(+3.89),ARX(-5.71),ASCL1(+5.3),ASPM(+2.11),ATP1B2(-1.79),AXL(-1.57),B4GALNT1(+3.19),BHLHE22(+5.15),BMP4(+1.85),BMPR1B(-2.97),BRINP1(+3.57),BRSK1(-1.69),BRSK2(+2.27),CBLN1(+5.11),CBS/CBSL(+2.37),CDK5R1(+2.97),CDKN1A(-2.32),CDON(+1.56),CELSR2(-1.92),CEP290(-1.67),CHL1(+2.12),CHN1(-1.64),CHRNA7(+1.94),CHRNB2(+2.52),CNTN1(+3.34),CNTN2(+4.37),COL2A1(+1.9),CR…
Cancer,Organismal Injury and Abnormalities	Lymphoreticular neoplasm	5.49e-20		-1.01	523	395	128	ABCA12(+2.54),ABCC9(+2.43),ADAM12(+3.56),ADAM9(-1.69),ADAMTS17(+4.3),ADAMTS5(+2.45),ADAMTSL3(+10.28),ADCY1(+3.35),ADCYAP1R1(+5.81),AFF3(+1.85),AHR(+3.68),AKAP2(+2.04),ALK(+3.89),ALOX15(-2.39),AMOTL1(+1.8),ANGPT1(+5.6),ANGPTL2(+2.25),ANK2(+2.8),ANKRD26(-1.77),ANKRD50(+1.66),ANKS1B(+2.02),ANO2(+4.77),ANO4(+2.57),ANXA2(+1.65),APBA1(+2.1),APBA3(-1.67),APCDD1(+15.97),APEX1(+1.71),ARHGAP31(+4.04),ASAP2…
Cancer,Organismal Injury and Abnormalities,Renal and Urological Disease	Bladder tumor	5.57e-20			273	201	72	ABCA12(+2.54),ABCC8(+4.12),ADAMTS14(+3.43),ADAMTS20(+2.39),ADAMTSL3(+10.28),ADCY8(+3.77),AFF3(+1.85),AHR(+3.68),ALK(+3.89),AMIGO2(+3.9),ANGPTL2(+2.25),ANKS1B(+2.02),APBA1(+2.1),ATP1A3(+2.61),ATP9A(+1.56),AUTS2(+3.63),AXIN2(+3.19),AXL(-1.57),BCKDHA(-1.77),BIRC5(+2.19),BLZF1(-2.08),BMP1(+1.86),BMP5(+3.06),BRCA1(+1.77),BUB1B(+1.96),C1orf174(-1.66),C1QL1(+2.32),C1QTNF1(+4.31),C3orf70(+4.68),CACNA1B(-…
Cancer,Organismal Injury and Abnormalities	Serous neoplasm	6.36e-20			217	169	48	ABCA8(+3.17),ABCC9(+2.43),ACP5(-2.76),ADAMTS19(+3.87),ADAMTSL3(+10.28),ADCY1(+3.35),ADCY2(-1.72),ADGRD1(-2.98),AKAP2(+2.04),AKAP6(+1.88),ALKBH7(-1.81),AMOTL1(+1.8),ANGPT1(+5.6),ANKRD24(-3.32),ANKRD50(+1.66),ANXA2(+1.65),APCDD1(+15.97),AQP1(+2.14),ARHGAP33(+2.31),ATP1B1(-2.11),ATP8A2(+2.14),AXIN2(+3.19),BRCA1(+1.77),BRIP1(+2.46),BSN(+2.15),BUB1B(+1.96),C3orf52(+2.26),C4A/C4B(+2.69),CACNA1C(+3.21),…
Behavior	Learning	7.82e-20	Increased	4.41	127	100	27	ABCC8(+4.12),ADCY1(+3.35),ADCY3(+1.72),ADCY8(+3.77),ADCYAP1(+4.25),ADD2(+2.03),AGER(-1.91),ARF4(-2.49),ARX(-5.71),ATP1A3(+2.61),ATP8A1(+3.33),BCHE(+2.65),BMPR1B(-2.97),BRINP1(+3.57),BRSK1(-1.69),C1QL1(+2.32),CACNA1C(+3.21),CACNA1E(+4.04),CACNA1G(+2.29),CAMK2B(+3.05),CAMKK2(+2.21),CAPN1(+1.7),CDK5R1(+2.97),CEBPD(+2.36),CHRM2(+1.92),CHRNA7(+1.94),CHRNB2(+2.52),CNR1(+8.01),CNTN2(+4.37),CPLX2(+1.98),…
Cancer,Hematological Disease,Immunological Disease,Organismal Injury and Abnormalities	Lymphocytic cancer	7.87e-20	Decreased	-2.754	371	279	92	ABCC9(+2.43),ADAM9(-1.69),ADAMTSL3(+10.28),ADARB2(+3.39),ADCY3(+1.72),ADD2(+2.03),ADGRB1(+2.1),AHR(+3.68),ALK(+3.89),AMOTL1(+1.8),ANK2(+2.8),ANKH(+1.95),ANKRD50(+1.66),ANXA2(+1.65),APBA1(+2.1),APBA3(-1.67),ARHGAP33(+2.31),ASAP2(+1.65),ATP10A(+2.87),ATP1B1(-2.11),ATRNL1(+1.51),AXL(-1.57),BACH2(+1.83),BBC3(-1.77),BCHE(+2.65),BCL11A(+3.04),BCL11B(+4.28),BICC1(+4.24),BIRC5(+2.19),BMF(+1.59),BMPER(+5.…
Cancer,Organismal Injury and Abnormalities	Cancer of head	1.06e-19		0.522	283	221	62	ABCA12(+2.54),ABCC5(+1.68),ADAM12(+3.56),ADAM9(-1.69),ADAMTS17(+4.3),ADAMTS5(+2.45),ADAMTSL3(+10.28),ALK(+3.89),ANGPT1(+5.6),ANKRD26(-1.77),ANKS1B(+2.02),ARX(-5.71),ASPN(+14.68),ATP10A(+2.87),ATRNL1(+1.51),AUTS2(+3.63),BAMBI(+1.63),BARHL1(+2.44),BCL11A(+3.04),BHLHE22(+5.15),BIRC5(+2.19),BMP4(+1.85),BMP5(+3.06),BMPR1B(-2.97),BNC2(+3.43),CACNA1E(+4.04),CACNA1F(-3.83),CACNA1G(+2.29),CADPS(+1.95),CAL…
Cancer,Organismal Injury and Abnormalities	Serous adenocarcinoma	1.07e-19			215	167	48	ABCA8(+3.17),ACP5(-2.76),ADAMTS19(+3.87),ADAMTSL3(+10.28),ADCY1(+3.35),ADCY2(-1.72),ADGRD1(-2.98),AKAP2(+2.04),AKAP6(+1.88),ALKBH7(-1.81),AMOTL1(+1.8),ANGPT1(+5.6),ANKRD24(-3.32),ANKRD50(+1.66),ANXA2(+1.65),APCDD1(+15.97),AQP1(+2.14),ARHGAP33(+2.31),ATP1B1(-2.11),ATP8A2(+2.14),AXIN2(+3.19),BRCA1(+1.77),BRIP1(+2.46),BSN(+2.15),BUB1B(+1.96),C3orf52(+2.26),C4A/C4B(+2.69),CACNA1C(+3.21),CALB2(+6.38),…
Cellular Development,Cellular Growth and Proliferation	Cell proliferation of tumor cell lines	1.08e-19	Increased	2.845	371	280	91	A2M(+4.05),ABLIM1(+1.7),ACRBP(-2.32),ADAM12(+3.56),ADAM9(-1.69),ADAMTS5(+2.45),ADCYAP1(+4.25),ADIPOR1(-1.58),AFAP1(+2.7),AFAP1-AS1(+1.93),AGER(-1.91),AHR(+3.68),ALCAM(+3.09),ALDOA(-1.51),ALK(+3.89),ANG(-3.03),ANGPTL2(+2.25),ANO1(+5.01),ANXA2(+1.65),APEX1(+1.71),AQP1(+2.14),ARF1(-1.49),ASCL1(+5.3),ASS1(+2.45),ATF5(+2.66),AXL(-1.57),BACE2(+1.84),BBC3(-1.77),BIRC5(+2.19),BMP4(+1.85),BMP5(+3.06),BMPR…
Embryonic Development,Nervous System Development and Function,Organ Development,Organismal Development,Tissue Development,Visual System Development and Function	Formation of eye	1.16e-19	Increased	2.156	128	103	25	ADAM9(-1.69),ADCY1(+3.35),ADCYAP1(+4.25),AGPAT3(+1.58),ALDH1A3(+3.21),ALOX15(-2.39),AQP1(+2.14),ARSB(+1.72),ASCL1(+5.3),ATP1B2(-1.79),ATP8A2(+2.14),BMP4(+1.85),BMPR1B(-2.97),CACNA1F(-3.83),CBS/CBSL(+2.37),CCL2(+2.16),CDHR1(+2.89),CDK20(-1.81),CDKN1A(-2.32),CEP290(-1.67),CFH(+16.28),CLIC4(+1.64),CNGA3(+5.89),COL1A1(+3.04),COL2A1(+1.9),COL5A1(+2.19),COL8A2(+5.86),CPAMD8(+1.7),CRX(+5.29),CXCL14(+1.9…
Organismal Development	Size of body	1.32e-19	Increased	6.139	207	150	57	ACOT13(-1.8),ADCY3(+1.72),ADCY8(+3.77),ADCYAP1R1(+5.81),AGER(-1.91),AHR(+3.68),AKAP6(+1.88),ALK(+3.89),ANGPTL2(+2.25),ANKRD26(-1.77),ANO1(+5.01),ANXA2(+1.65),APBA1(+2.1),AQP1(+2.14),ARRB1(+2.62),ARSB(+1.72),ATP1A3(+2.61),ATP8A2(+2.14),BACE2(+1.84),BAMBI(+1.63),BMF(+1.59),BMP4(+1.85),BMPER(+5.67),BRCA1(+1.77),BRINP1(+3.57),BSCL2(-1.53),BSX(+7.77),CA4(-6.57),CAMK2B(+3.05),CBS/CBSL(+2.37),CBX7(-1.96…
Cancer,Organismal Injury and Abnormalities,Renal and Urological Disease	Bladder cancer	1.56e-19			266	194	72	ABCA12(+2.54),ABCC8(+4.12),ADAMTS14(+3.43),ADAMTS20(+2.39),ADAMTSL3(+10.28),ADCY8(+3.77),AFF3(+1.85),AHR(+3.68),ALK(+3.89),AMIGO2(+3.9),ANGPTL2(+2.25),ANKS1B(+2.02),APBA1(+2.1),ATP1A3(+2.61),ATP9A(+1.56),AUTS2(+3.63),AXIN2(+3.19),AXL(-1.57),BCKDHA(-1.77),BIRC5(+2.19),BLZF1(-2.08),BMP1(+1.86),BMP5(+3.06),BRCA1(+1.77),BUB1B(+1.96),C1orf174(-1.66),C1QL1(+2.32),C1QTNF1(+4.31),C3orf70(+4.68),CACNA1B(-…
Organismal Survival	Neonatal death	1.57e-19	Decreased	-6.612	123	98	25	ABCA12(+2.54),ADAM12(+3.56),ADAM9(-1.69),AKAP6(+1.88),ALDH1A3(+3.21),APBA1(+2.1),APBA3(-1.67),ARRB1(+2.62),ASCL1(+5.3),ASS1(+2.45),ATP1A3(+2.61),BCL11A(+3.04),BCL11B(+4.28),BMPER(+5.67),BRCA1(+1.77),BRSK1(-1.69),BRSK2(+2.27),CADPS(+1.95),CD44(+3.93),CDK6(+2.2),CDKN1A(-2.32),CDON(+1.56),CEBPD(+2.36),CLDN1(+1.7),COL25A1(+3.53),COL2A1(+1.9),CPLX2(+1.98),CREB3L2(+1.81),CTNNBIP1(+1.87),CUL7(-1.62),CXC…
Cancer,Organismal Injury and Abnormalities,Reproductive System Disease	Breast carcinoma	4.58e-19		0.817	343	264	79	ABCA8(+3.17),ABCC5(+1.68),ABCC9(+2.43),ABLIM1(+1.7),ABLIM3(+3.62),ACP5(-2.76),ADAMTS10(+3.13),ADAMTS14(+3.43),ADAMTS20(+2.39),ADAMTS5(+2.45),ADAMTS8(+1.83),ADARB2(+3.39),ADCY3(+1.72),ADCYAP1(+4.25),AFF2(+2.21),AKAP6(+1.88),ALK(+3.89),ANGPTL2(+2.25),ANK2(+2.8),ANKRD24(-3.32),AP3B2(+2.89),AQP1(+2.14),ARF4(-2.49),ARHGAP20(+3.95),ARHGAP31(+4.04),ARHGEF40(+1.86),ARRB1(+2.62),ASTN2(+1.88),ATL3(+1.78),A…
Cancer,Organismal Injury and Abnormalities	Advanced stage tumor	5.96e-19		1.629	247	183	64	ABCA8(+3.17),ABLIM1(+1.7),ACP5(-2.76),ADAM12(+3.56),ADAM9(-1.69),AFAP1-AS1(+1.93),AGER(-1.91),ALCAM(+3.09),ALK(+3.89),ANGPTL2(+2.25),ANXA2(+1.65),AQP1(+2.14),AXIN2(+3.19),AXL(-1.57),BBC3(-1.77),BIRC5(+2.19),BMP1(+1.86),BMP4(+1.85),BMPR2(+2.38),BRCA1(+1.77),BRIP1(+2.46),C1orf61(+7.51),C4A/C4B(+2.69),CALB2(+6.38),CALD1(+1.68),CCDC80(+1.98),CCL2(+2.16),CCN4(+3.55),CD44(+3.93),CDC25A(+1.75),CDH1(+3.1…
Cancer,Neurological Disease,Organismal Injury and Abnormalities	Nervous system neoplasm	6.13e-19		0.469	299	226	73	ABCA8(+3.17),ABCC4(-2.19),ABCC9(+2.43),ADAM12(+3.56),ADAM9(-1.69),ADAMTS5(+2.45),ADAMTS8(+1.83),ADARB1(+1.73),ADCY8(+3.77),ADGRB1(+2.1),ADGRD1(-2.98),ADGRG1(-1.62),AK5(+2.51),AKAP2(+2.04),ALCAM(+3.09),ALDOA(-1.51),ALDOC(-3.65),ALK(+3.89),ANGPT1(+5.6),ANK2(+2.8),ANO2(+4.77),ANXA2(+1.65),APOL4(+2.77),ARF4(-2.49),ARHGAP33(+2.31),ARRB1(+2.62),ASCL1(+5.3),ASPM(+2.11),ASTN2(+1.88),ATF5(+2.66),ATP1B1(-2…
Cancer,Gastrointestinal Disease,Organismal Injury and Abnormalities	Oral cavity carcinoma	7.05e-19			250	198	52	ABCA12(+2.54),ABCC5(+1.68),ADAM12(+3.56),ADAM9(-1.69),ADAMTS17(+4.3),ADAMTSL3(+10.28),ALK(+3.89),ANKRD26(-1.77),ANKS1B(+2.02),ARX(-5.71),ASPN(+14.68),ATP10A(+2.87),ATRNL1(+1.51),AUTS2(+3.63),BAMBI(+1.63),BARHL1(+2.44),BCL11A(+3.04),BHLHE22(+5.15),BIRC5(+2.19),BMP4(+1.85),BMP5(+3.06),BMPR1B(-2.97),BNC2(+3.43),CACNA1E(+4.04),CACNA1F(-3.83),CACNA1G(+2.29),CADPS(+1.95),CD44(+3.93),CDCA2(+1.8),CDH18(+…
Cell-To-Cell Signaling and Interaction,Nervous System Development and Function	Synaptic transmission	1.16e-18	Increased	2.314	104	91	13	ADARB1(+1.73),ADCY1(+3.35),ADCY8(+3.77),ALK(+3.89),ANKS1B(+2.02),APBA1(+2.1),APBA3(-1.67),BCHE(+2.65),BSN(+2.15),CACNA1B(-1.83),CACNA1C(+3.21),CACNA1G(+2.29),CACNA2D3(+5.28),CBLN1(+5.11),CD44(+3.93),CHRM2(+1.92),CHRM3(+2.33),CHRNA3(+3.24),CHRNA5(+2.29),CHRNA7(+1.94),CHRNB2(+2.52),CNR1(+8.01),DHCR7(-1.88),DRD4(-3.01),EPHB1(+2.81),FGF14(+2.35),GABBR1(+1.85),GABBR2(+3.43),GABRA3(+2.43),GLRA1(+5.8),G…
Cancer,Gastrointestinal Disease,Organismal Injury and Abnormalities	Oral cancer	1.44e-18			253	200	53	ABCA12(+2.54),ABCC5(+1.68),ADAM12(+3.56),ADAM9(-1.69),ADAMTS17(+4.3),ADAMTSL3(+10.28),ALK(+3.89),ANKRD26(-1.77),ANKS1B(+2.02),ARX(-5.71),ASPN(+14.68),ATP10A(+2.87),ATRNL1(+1.51),AUTS2(+3.63),BAMBI(+1.63),BARHL1(+2.44),BCL11A(+3.04),BHLHE22(+5.15),BIRC5(+2.19),BMP4(+1.85),BMP5(+3.06),BMPR1B(-2.97),BNC2(+3.43),CACNA1E(+4.04),CACNA1F(-3.83),CACNA1G(+2.29),CADPS(+1.95),CD44(+3.93),CDCA2(+1.8),CDH18(+…
Cancer,Organismal Injury and Abnormalities	Advanced malignant tumor	1.61e-18		1.629	245	182	63	ABCA8(+3.17),ABLIM1(+1.7),ACP5(-2.76),ADAM12(+3.56),ADAM9(-1.69),AFAP1-AS1(+1.93),AGER(-1.91),ALCAM(+3.09),ALK(+3.89),ANGPTL2(+2.25),ANXA2(+1.65),AQP1(+2.14),AXIN2(+3.19),AXL(-1.57),BBC3(-1.77),BIRC5(+2.19),BMP4(+1.85),BMPR2(+2.38),BRCA1(+1.77),BRIP1(+2.46),C1orf61(+7.51),C4A/C4B(+2.69),CALB2(+6.38),CALD1(+1.68),CCDC80(+1.98),CCL2(+2.16),CCN4(+3.55),CD44(+3.93),CDC25A(+1.75),CDH1(+3.1),CDK5RAP3(-…
Neurological Disease	Neurological signs	1.64e-18		-0.008	177	120	57	A2M(+4.05),ACTN3(-4.12),ADCY1(+3.35),ADCY2(-1.72),ADCY8(+3.77),ADGRD1(-2.98),AQP1(+2.14),ARX(-5.71),ASCL1(+5.3),ATP1B1(-2.11),B4GALNT1(+3.19),BCL11B(+4.28),BHLHE22(+5.15),BRINP1(+3.57),C4A/C4B(+2.69),CACNA1B(-1.83),CACNA1F(-3.83),CACNA2D3(+5.28),CAMK2B(+3.05),CAMKK2(+2.21),CD44(+3.93),CDK5R1(+2.97),CDKN1C(-1.78),CHGB(+5.21),CHN1(-1.64),CHRM2(+1.92),CHRM3(+2.33),CHRNA3(+3.24),CHRNA5(+2.29),CHRNA7(…
Cancer,Gastrointestinal Disease,Organismal Injury and Abnormalities	Oral tumor	1.72e-18			254	200	54	ABCA12(+2.54),ABCC5(+1.68),ADAM12(+3.56),ADAM9(-1.69),ADAMTS17(+4.3),ADAMTSL3(+10.28),ALK(+3.89),ANKRD26(-1.77),ANKS1B(+2.02),ARX(-5.71),ASPN(+14.68),ATP10A(+2.87),ATRNL1(+1.51),AUTS2(+3.63),BAMBI(+1.63),BARHL1(+2.44),BCL11A(+3.04),BHLHE22(+5.15),BIRC5(+2.19),BMP4(+1.85),BMP5(+3.06),BMPR1B(-2.97),BNC2(+3.43),CACNA1E(+4.04),CACNA1F(-3.83),CACNA1G(+2.29),CADPS(+1.95),CD44(+3.93),CDCA2(+1.8),CDH18(+…
Cancer,Hematological Disease,Organismal Injury and Abnormalities	Hematologic cancer of cells	2.07e-18	Decreased	-2.666	357	267	90	ABCC9(+2.43),ADAM9(-1.69),ADAMTSL3(+10.28),ADARB2(+3.39),ADCY3(+1.72),ADD2(+2.03),ADGRB1(+2.1),AHR(+3.68),ALK(+3.89),AMOTL1(+1.8),ANK2(+2.8),ANKH(+1.95),ANKRD50(+1.66),ANXA2(+1.65),APBA1(+2.1),APBA3(-1.67),ARHGAP33(+2.31),ASAP2(+1.65),ATP10A(+2.87),ATP1B1(-2.11),ATRNL1(+1.51),AXL(-1.57),BACH2(+1.83),BBC3(-1.77),BCHE(+2.65),BCL11B(+4.28),BICC1(+4.24),BIRC5(+2.19),BMF(+1.59),BMPER(+5.67),BNC2(+3.43…
Cancer,Endocrine System Disorders,Organismal Injury and Abnormalities,Reproductive System Disease	Epithelial ovarian tumor	2.53e-18			324	248	76	ABCA12(+2.54),ABCA8(+3.17),ABCC4(-2.19),ABCC8(+4.12),ACP5(-2.76),ADAMTS10(+3.13),ADAMTS19(+3.87),ADAMTS20(+2.39),ADAMTSL3(+10.28),ADCY1(+3.35),ADCY2(-1.72),ADCYAP1R1(+5.81),ADD2(+2.03),AFF3(+1.85),AIF1(-4.76),AKAP2(+2.04),AKAP6(+1.88),ALKBH7(-1.81),AMOTL1(+1.8),ANGPT1(+5.6),ANKRD24(-3.32),ANKRD50(+1.66),AOPEP(+1.65),APCDD1(+15.97),ARHGEF40(+1.86),ASPM(+2.11),ATP8A1(+3.33),ATP8A2(+2.14),AXIN2(+3.1…
Cancer,Organismal Injury and Abnormalities,Renal and Urological Disease	Bladder carcinoma	2.67e-18			246	181	65	ABCA12(+2.54),ABCC8(+4.12),ADAMTS14(+3.43),ADAMTS20(+2.39),ADAMTSL3(+10.28),ADCY8(+3.77),AFF3(+1.85),AHR(+3.68),ALK(+3.89),AMIGO2(+3.9),ANGPTL2(+2.25),ANKS1B(+2.02),ATP1A3(+2.61),ATP9A(+1.56),AUTS2(+3.63),AXIN2(+3.19),AXL(-1.57),BCKDHA(-1.77),BIRC5(+2.19),BLZF1(-2.08),BMP1(+1.86),BMP5(+3.06),BRCA1(+1.77),BUB1B(+1.96),C1orf174(-1.66),C1QL1(+2.32),C1QTNF1(+4.31),C3orf70(+4.68),CACNA1B(-1.83),CACNA1…
Cancer,Gastrointestinal Disease,Organismal Injury and Abnormalities	Oral squamous cell carcinoma	3.04e-18			242	190	52	ABCA12(+2.54),ABCC5(+1.68),ADAM12(+3.56),ADAM9(-1.69),ADAMTS17(+4.3),ADAMTSL3(+10.28),ALK(+3.89),ANKRD26(-1.77),ANKS1B(+2.02),ARX(-5.71),ASPN(+14.68),ATP10A(+2.87),ATRNL1(+1.51),AUTS2(+3.63),BAMBI(+1.63),BARHL1(+2.44),BCL11A(+3.04),BHLHE22(+5.15),BIRC5(+2.19),BMP4(+1.85),BMP5(+3.06),BMPR1B(-2.97),BNC2(+3.43),CACNA1E(+4.04),CACNA1F(-3.83),CACNA1G(+2.29),CADPS(+1.95),CD44(+3.93),CDCA2(+1.8),CDH18(+…
Cell Morphology,Nervous System Development and Function,Tissue Morphology	Morphology of neurons	3.31e-18			161	128	33	A2M(+4.05),ADCYAP1(+4.25),ADCYAP1R1(+5.81),ADGRB1(+2.1),APBA1(+2.1),ARX(-5.71),ASCL1(+5.3),B4GALNT1(+3.19),BMPR1B(-2.97),BRINP1(+3.57),BRSK1(-1.69),BRSK2(+2.27),CACNA1C(+3.21),CACNA1F(-3.83),CACNA2D3(+5.28),CADPS(+1.95),CAMKK2(+2.21),CBLN1(+5.11),CDH23(-1.49),CDK5R1(+2.97),CFH(+16.28),CHL1(+2.12),CHN1(-1.64),CHRNA7(+1.94),CHRNB2(+2.52),CLCN6(-2.63),CNGA3(+5.89),CNR1(+8.01),CNTN1(+3.34),COL13A1(+2…
Respiratory System Development and Function	Respiratory system development	3.54e-18		1.118	104	82	22	ABCA12(+2.54),ADCY3(+1.72),AHR(+3.68),ALDH1A3(+3.21),ANO1(+5.01),ARRB1(+2.62),ASCL1(+5.3),BMP4(+1.85),BMP5(+3.06),BMPR2(+2.38),CBS/CBSL(+2.37),CCL2(+2.16),CDKN1A(-2.32),COL2A1(+1.9),COL3A1(+8.18),DCHS1(+1.75),DENND1B(+1.65),DHCR7(-1.88),DISP1(+1.61),EBF2(+3.88),EBF3(+4.04),EGFR(+2.45),ELK3(+2.33),EPAS1(+2.73),EPOR(-2.66),FBLN1(+4.81),FBN1(+1.56),FGF1(+2.78),FGFR1(+1.86),FGFR3(-2.34),FGFRL1(-1.69)…
Cancer,Endocrine System Disorders,Organismal Injury and Abnormalities,Reproductive System Disease	Ovarian carcinoma	4.32e-18			323	247	76	ABCA12(+2.54),ABCA8(+3.17),ABCC4(-2.19),ABCC8(+4.12),ACP5(-2.76),ADAMTS10(+3.13),ADAMTS19(+3.87),ADAMTS20(+2.39),ADAMTSL3(+10.28),ADCY1(+3.35),ADCY2(-1.72),ADCYAP1R1(+5.81),ADD2(+2.03),AFF3(+1.85),AIF1(-4.76),AKAP2(+2.04),AKAP6(+1.88),ALKBH7(-1.81),AMOTL1(+1.8),ANGPT1(+5.6),ANKRD24(-3.32),ANKRD50(+1.66),AOPEP(+1.65),APCDD1(+15.97),ARHGEF40(+1.86),ASPM(+2.11),ATP8A1(+3.33),ATP8A2(+2.14),AXIN2(+3.1…
Behavior	Cognition	4.83e-18	Increased	4.428	131	103	28	ABCC8(+4.12),ADCY1(+3.35),ADCY3(+1.72),ADCY8(+3.77),ADCYAP1(+4.25),ADD2(+2.03),AGER(-1.91),ARF4(-2.49),ARX(-5.71),ATP1A3(+2.61),ATP8A1(+3.33),BCHE(+2.65),BMPR1B(-2.97),BRINP1(+3.57),BRSK1(-1.69),C1QL1(+2.32),CACNA1C(+3.21),CACNA1E(+4.04),CACNA1G(+2.29),CAMK2B(+3.05),CAMKK2(+2.21),CAPN1(+1.7),CDK5R1(+2.97),CEBPD(+2.36),CHL1(+2.12),CHRM2(+1.92),CHRNA7(+1.94),CHRNB2(+2.52),CNR1(+8.01),CNTN2(+4.37),C…
Cardiovascular System Development and Function	Development of vasculature	5.48e-18	Increased	2.757	250	184	66	ABCC8(+4.12),ADAM12(+3.56),ADAM9(-1.69),ADAMTS8(+1.83),ADGRB1(+2.1),ADGRG1(-1.62),AGER(-1.91),AHR(+3.68),AIF1(-4.76),ALCAM(+3.09),ALOX15(-2.39),AMIGO2(+3.9),ANG(-3.03),ANGPT1(+5.6),ANGPTL2(+2.25),ANXA2(+1.65),AQP1(+2.14),ATOH8(+2.32),AXL(-1.57),BIRC5(+2.19),BMP1(+1.86),BMP4(+1.85),BMPER(+5.67),BMPR2(+2.38),BRCA1(+1.77),CAPN1(+1.7),CBS/CBSL(+2.37),CCL2(+2.16),CCN3(+4.98),CD44(+3.93),CDH1(+3.1),CDK…
Nervous System Development and Function,Neurological Disease	Abnormal morphology of central nervous system	6.09e-18			135	101	34	ADCY1(+3.35),ADCY3(+1.72),ALK(+3.89),ARX(-5.71),ASCL1(+5.3),ASPM(+2.11),ATP1B2(-1.79),AXL(-1.57),B4GALNT1(+3.19),BHLHE22(+5.15),BMP4(+1.85),BRINP1(+3.57),BRSK1(-1.69),BRSK2(+2.27),CBLN1(+5.11),CBS/CBSL(+2.37),CDK5R1(+2.97),CDON(+1.56),CELSR2(-1.92),CEP290(-1.67),CHL1(+2.12),CHN1(-1.64),CHRNA7(+1.94),CHRNB2(+2.52),CNTN1(+3.34),COL2A1(+1.9),CRMP1(+1.96),CTSV(+2.48),CUX2(+1.74),CXCR4(+2.78),DAB1(+2.…
Cellular Movement	Invasion of cells	6.22e-18	Increased	4.03	231	189	42	A2M(+4.05),ABLIM1(+1.7),ADAM12(+3.56),ADAM9(-1.69),ADCY3(+1.72),AFAP1-AS1(+1.93),AGER(-1.91),AHR(+3.68),AJAP1(+2.43),ALCAM(+3.09),ALK(+3.89),ANG(-3.03),ANXA2(+1.65),APEX1(+1.71),AXL(-1.57),BIRC5(+2.19),BMP4(+1.85),BMP5(+3.06),BMPR2(+2.38),BRCA1(+1.77),BRINP3(+6.4),C1orf61(+7.51),CCL2(+2.16),CCN3(+4.98),CCN4(+3.55),CCNA2(+1.74),CD44(+3.93),CDC25B(+2.16),CDH1(+3.1),CDK14(+2.15),CDK5R1(+2.97),CDK5RA…
Organismal Development	Morphology of body cavity	6.65e-18			354	247	107	ABCA12(+2.54),ABCC4(-2.19),ABCC8(+4.12),ABCC9(+2.43),ACADL(+2.1),ADAM12(+3.56),ADAM9(-1.69),ADD2(+2.03),ADGRD1(-2.98),ADGRG1(-1.62),ADIPOR1(-1.58),AGER(-1.91),AHR(+3.68),ALOX15(-2.39),ANGPT1(+5.6),ANK2(+2.8),ANKRD1(-2.65),ANO1(+5.01),APEX1(+1.71),AQP1(+2.14),ARFGEF3(-1.73),ARRB1(+2.62),ARSB(+1.72),ARX(-5.71),AXL(-1.57),B4GALNT1(+3.19),BBC3(-1.77),BCL11A(+3.04),BCL11B(+4.28),BICC1(+4.24),BIRC5(+2.…
Cellular Movement	Cell movement of neurons	7.3e-18	Increased	3.194	82	64	18	A2M(+4.05),ADCYAP1(+4.25),ADCYAP1R1(+5.81),ADGRG1(-1.62),ARF1(-1.49),ARX(-5.71),ASCL1(+5.3),ASPM(+2.11),AUTS2(+3.63),AXL(-1.57),BARHL1(+2.44),BMP4(+1.85),CCDC141(+4.04),CDH23(-1.49),CDK5R1(+2.97),CELSR2(-1.92),CHL1(+2.12),CNR1(+8.01),CNTN2(+4.37),COL3A1(+8.18),CXCR4(+2.78),DAB1(+2.05),DCLK1(+4.51),DCX(+1.97),DDIT4(-1.74),DLX2(+2.73),DOCK7(+1.56),E2F3(+1.56),EBF1(+17.28),EBF2(+3.88),EBF3(+4.04),ED…
Nervous System Development and Function,Organ Morphology,Organismal Development	Morphology of brain	8.17e-18			145	105	40	ADCY1(+3.35),ADCY3(+1.72),ADCYAP1(+4.25),ALK(+3.89),ARX(-5.71),ASCL1(+5.3),ASPM(+2.11),ATP1B2(-1.79),AXL(-1.57),B4GALNT1(+3.19),BHLHE22(+5.15),BMPR1B(-2.97),BRINP1(+3.57),BRSK1(-1.69),BRSK2(+2.27),CBLN1(+5.11),CDK5R1(+2.97),CDKN1A(-2.32),CDON(+1.56),CELSR2(-1.92),CEP290(-1.67),CHL1(+2.12),CHN1(-1.64),CHRNA7(+1.94),CHRNB2(+2.52),CNTN1(+3.34),COL2A1(+1.9),CRMP1(+1.96),CTSV(+2.48),CUX2(+1.74),CXCR4(…
Cancer,Neurological Disease,Organismal Injury and Abnormalities	Central nervous system tumor	9.27e-18		0.327	284	217	67	ABCA8(+3.17),ABCC9(+2.43),ADAM12(+3.56),ADAM9(-1.69),ADAMTS5(+2.45),ADAMTS8(+1.83),ADARB1(+1.73),ADCY8(+3.77),ADGRB1(+2.1),ADGRD1(-2.98),ADGRG1(-1.62),AK5(+2.51),AKAP2(+2.04),ALCAM(+3.09),ALDOA(-1.51),ALDOC(-3.65),ALK(+3.89),ANGPT1(+5.6),ANK2(+2.8),ANO2(+4.77),ANXA2(+1.65),APOL4(+2.77),ARF4(-2.49),ARHGAP33(+2.31),ARRB1(+2.62),ASPM(+2.11),ASTN2(+1.88),ATF5(+2.66),ATP1B1(-2.11),AXIN2(+3.19),BARHL1(…
Cancer,Neurological Disease,Organismal Injury and Abnormalities	Central nervous system solid tumor	1.14e-17		0.327	283	216	67	ABCA8(+3.17),ABCC9(+2.43),ADAM12(+3.56),ADAM9(-1.69),ADAMTS5(+2.45),ADAMTS8(+1.83),ADARB1(+1.73),ADCY8(+3.77),ADGRB1(+2.1),ADGRD1(-2.98),ADGRG1(-1.62),AK5(+2.51),AKAP2(+2.04),ALCAM(+3.09),ALDOA(-1.51),ALDOC(-3.65),ALK(+3.89),ANGPT1(+5.6),ANK2(+2.8),ANO2(+4.77),ANXA2(+1.65),APOL4(+2.77),ARF4(-2.49),ARHGAP33(+2.31),ARRB1(+2.62),ASPM(+2.11),ASTN2(+1.88),ATF5(+2.66),ATP1B1(-2.11),AXIN2(+3.19),BARHL1(…
Behavior	Locomotion	1.41e-17		-0.376	105	88	17	ACADL(+2.1),ADARB1(+1.73),ADCY1(+3.35),ADCY8(+3.77),ADCYAP1(+4.25),ALDH1A3(+3.21),ALK(+3.89),APBA1(+2.1),ATP1A3(+2.61),BCHE(+2.65),BHLHE22(+5.15),BSX(+7.77),CACNA1B(-1.83),CACNA1C(+3.21),CACNA1E(+4.04),CDH23(-1.49),CDK5R1(+2.97),CHL1(+2.12),CHN1(-1.64),CHRM2(+1.92),CHRNA3(+3.24),CHRNB2(+2.52),CLN6(+1.98),CNR1(+8.01),CNTN2(+4.37),CPLX2(+1.98),DAB1(+2.05),DIO3(+6.08),DLX2(+2.73),DMRT3(-3.67),DRD4(-…
Cancer,Organismal Injury and Abnormalities	Growth of tumor	1.81e-17		1.973	215	157	58	ABCC4(-2.19),ADAM9(-1.69),ADCYAP1R1(+5.81),ADGRB1(+2.1),ADGRG1(-1.62),AFAP1-AS1(+1.93),AGER(-1.91),AHR(+3.68),ALCAM(+3.09),ALK(+3.89),ANG(-3.03),ANK2(+2.8),ANXA2(+1.65),APCDD1(+15.97),AXL(-1.57),B4GALNT1(+3.19),BAMBI(+1.63),BBC3(-1.77),BIRC5(+2.19),BMP4(+1.85),BMPR2(+2.38),BRCA1(+1.77),BST2(-3.56),BTG3(-2.04),BUB1B(+1.96),CCL2(+2.16),CCN3(+4.98),CCN4(+3.55),CD44(+3.93),CDH1(+3.1),CDK6(+2.2),CDKN1…
Neurological Disease,Skeletal and Muscular Disorders	Neuromuscular disease	1.88e-17		-1.276	212	143	69	A2M(+4.05),ACTN3(-4.12),ADCY2(-1.72),ADGRD1(-2.98),AK5(+2.51),ALCAM(+3.09),ANXA2(+1.65),AQP1(+2.14),ARRB1(+2.62),ASCL1(+5.3),ATP1B1(-2.11),AXL(-1.57),B4GALNT1(+3.19),BCHE(+2.65),BCL11B(+4.28),BRINP1(+3.57),BST2(-3.56),C4A/C4B(+2.69),CACNA1B(-1.83),CACNA1C(+3.21),CACNA1F(-3.83),CACNA2D3(+5.28),CAMK2B(+3.05),CAMKK2(+2.21),CCL2(+2.16),CD44(+3.93),CDK5R1(+2.97),CDKN1C(-1.78),CHGA(+14.1),CHGB(+5.21),C…
Connective Tissue Development and Function,Skeletal and Muscular System Development and Function,Tissue Development	Morphology of bone	2.19e-17			148	112	36	AGER(-1.91),AHR(+3.68),ANKH(+1.95),ARSB(+1.72),BMP1(+1.86),BMP4(+1.85),BMPER(+5.67),BMPR1B(-2.97),BRCA1(+1.77),BTG3(-2.04),CAPN1(+1.7),CCN3(+4.98),CCN4(+3.55),CD44(+3.93),CDK20(-1.81),CDKN1A(-2.32),CDO1(-1.69),CDON(+1.56),CHPF(-1.59),CNR1(+8.01),COL1A1(+3.04),COL27A1(+1.86),COL2A1(+1.9),COL9A1(+1.52),CREB3L2(+1.81),CTNNBIP1(+1.87),CTSV(+2.48),CYP1A1(+5.71),CYP1B1(+2.61),CYP27B1(-2.51),CYP51A1(-1.…
Neurological Disease	Dyskinesia	2.39e-17		1.276	154	103	51	A2M(+4.05),ACTN3(-4.12),ADCY2(-1.72),ADGRD1(-2.98),AQP1(+2.14),ARX(-5.71),ASCL1(+5.3),ATP1B1(-2.11),B4GALNT1(+3.19),BCL11B(+4.28),BHLHE22(+5.15),C4A/C4B(+2.69),CACNA1B(-1.83),CACNA1F(-3.83),CACNA2D3(+5.28),CAMK2B(+3.05),CAMKK2(+2.21),CD44(+3.93),CDK5R1(+2.97),CDKN1C(-1.78),CHGB(+5.21),CHN1(-1.64),CHRM2(+1.92),CHRM3(+2.33),CHRNA3(+3.24),CHRNA5(+2.29),CHRNA7(+1.94),CHRNB2(+2.52),CNR1(+8.01),CPLX2(+…
Cancer,Hematological Disease,Organismal Injury and Abnormalities	Mature lymphocytic neoplasm	2.5e-17			310	233	77	ABCC9(+2.43),ACP5(-2.76),ADAM9(-1.69),ADAMTSL3(+10.28),ADD2(+2.03),ADGRB1(+2.1),AHR(+3.68),ALK(+3.89),AMOTL1(+1.8),ANK2(+2.8),ANKH(+1.95),ANKRD50(+1.66),ANXA2(+1.65),APBA1(+2.1),APBA3(-1.67),ARHGAP33(+2.31),ASAP2(+1.65),ATP10A(+2.87),ATP1B1(-2.11),ATRNL1(+1.51),BACH2(+1.83),BBC3(-1.77),BCHE(+2.65),BCL11A(+3.04),BCL11B(+4.28),BICC1(+4.24),BIRC5(+2.19),BMF(+1.59),BMPER(+5.67),BNC2(+3.43),BRCA1(+1.7…
Cellular Movement,Nervous System Development and Function	Migration of neurons	2.51e-17	Increased	3.315	79	63	16	ADCYAP1(+4.25),ADCYAP1R1(+5.81),ADGRG1(-1.62),ARF1(-1.49),ARX(-5.71),ASCL1(+5.3),ASPM(+2.11),AUTS2(+3.63),AXL(-1.57),BARHL1(+2.44),BMP4(+1.85),CCDC141(+4.04),CDH23(-1.49),CDK5R1(+2.97),CELSR2(-1.92),CHL1(+2.12),CNR1(+8.01),CNTN2(+4.37),COL3A1(+8.18),CXCR4(+2.78),DAB1(+2.05),DCLK1(+4.51),DCX(+1.97),DDIT4(-1.74),DLX2(+2.73),DOCK7(+1.56),E2F3(+1.56),EBF1(+17.28),EBF2(+3.88),EBF3(+4.04),EDNRB(-4.04),…
Cancer,Organismal Injury and Abnormalities	Mixed neoplasia	3.18e-17			293	230	63	ABCA12(+2.54),ABCC4(-2.19),ACP5(-2.76),ADAMTS10(+3.13),ADAMTS20(+2.39),ADARB2(+3.39),ADCY2(-1.72),ADCYAP1R1(+5.81),ADD2(+2.03),AFF3(+1.85),AIF1(-4.76),AKAP6(+1.88),ALK(+3.89),AMOTL1(+1.8),ANKRD24(-3.32),ANKRD26(-1.77),AOPEP(+1.65),AP3B2(+2.89),ARHGEF40(+1.86),ASPM(+2.11),ATP8A1(+3.33),ATP8A2(+2.14),BRCA1(+1.77),BRINP3(+6.4),C1orf61(+7.51),CACNA1B(-1.83),CACNA1E(+4.04),CACNA1G(+2.29),CACNA2D1(+3.7…
Cancer,Gastrointestinal Disease,Hepatic System Disease,Organismal Injury and Abnormalities	Hepatocellular carcinoma	4.68e-17		-0.453	202	154	48	ABCA8(+3.17),ADAM12(+3.56),ADAM9(-1.69),ADARB2(+3.39),ADCY2(-1.72),ADGRG1(-1.62),ANKRD26(-1.77),AP3B2(+2.89),ARF1(-1.49),ASF1B(+1.88),ASPM(+2.11),ASS1(+2.45),ATP1B1(-2.11),ATP8A2(+2.14),AUTS2(+3.63),AXIN2(+3.19),AXL(-1.57),B3GAT2(+2.08),BMP3(+3.85),BRCA1(+1.77),BRINP3(+6.4),BUB1B(+1.96),C1orf61(+7.51),C3orf70(+4.68),CACNA1G(+2.29),CACNA2D1(+3.79),CBX7(-1.96),CCDC80(+1.98),CCNA2(+1.74),CCNB1(+1.58…
Organismal Injury and Abnormalities	Extraintestinal functional disorder	5.44e-17	Decreased	-2.365	113	85	28	A2M(+4.05),ABCD4(-1.52),ALDH1A3(+3.21),ARRB1(+2.62),ASCL1(+5.3),ATP1A3(+2.61),BCHE(+2.65),BRCA1(+1.77),C4A/C4B(+2.69),CA4(-6.57),CACNA1B(-1.83),CACNA1C(+3.21),CACNA1F(-3.83),CACNA1G(+2.29),CACNA2D1(+3.79),CACNA2D3(+5.28),CACNA2D4(+4.85),CD44(+3.93),CDC42EP3(+2.0),CDKN1A(-2.32),CHGB(+5.21),CHRM2(+1.92),CHRM3(+2.33),CHRNA3(+3.24),CHRNA5(+2.29),CHRNA7(+1.94),CHRNB2(+2.52),CNR1(+8.01),COL2A1(+1.9),CU…
Psychological Disorders	Schizophrenia spectrum disorder	7e-17			130	111	19	ABLIM3(+3.62),ACSBG1(-3.4),ALDH1A3(+3.21),ALDOC(-3.65),APOL4(+2.77),ARX(-5.71),ATP1A3(+2.61),AUTS2(+3.63),BCHE(+2.65),C4A/C4B(+2.69),CA4(-6.57),CACNA1B(-1.83),CACNA1C(+3.21),CACNA1G(+2.29),CACNA2D1(+3.79),CACNA2D3(+5.28),CACNA2D4(+4.85),CALY(-2.89),CELF6(+3.57),CHRM2(+1.92),CHRM3(+2.33),CHRNA3(+3.24),CHRNA5(+2.29),CHRNA7(+1.94),CHRNB2(+2.52),CNR1(+8.01),COL3A1(+8.18),CPLX2(+1.98),CRYM(+4.04),CSMD…
Cancer,Endocrine System Disorders,Organismal Injury and Abnormalities,Reproductive System Disease	Development of gonadal tumor	1.31e-16			305	235	70	ABCA12(+2.54),ABCA8(+3.17),ABCC4(-2.19),ACP5(-2.76),ADAMTS10(+3.13),ADAMTS19(+3.87),ADAMTS20(+2.39),ADAMTSL3(+10.28),ADCY1(+3.35),ADCY2(-1.72),ADCYAP1R1(+5.81),ADD2(+2.03),AFF3(+1.85),AIF1(-4.76),AKAP2(+2.04),AKAP6(+1.88),ALKBH7(-1.81),AMOTL1(+1.8),ANGPT1(+5.6),ANKRD24(-3.32),ANKRD50(+1.66),AOPEP(+1.65),APCDD1(+15.97),ARHGEF40(+1.86),ASPM(+2.11),ATP8A1(+3.33),ATP8A2(+2.14),AXIN2(+3.19),BMPR1B(-2.…
Organismal Injury and Abnormalities,Renal and Urological Disease	Renal lesion	1.33e-16		-0.715	264	193	71	ADCY2(-1.72),AGER(-1.91),AKAP2(+2.04),ANK2(+2.8),ANXA2(+1.65),AQP1(+2.14),ARAP2(+1.94),ARFGEF3(-1.73),ARX(-5.71),ASPM(+2.11),ATP1B1(-2.11),AXIN2(+3.19),AXL(-1.57),BICC1(+4.24),BIRC5(+2.19),BMP4(+1.85),BPGM(-1.82),BRCA1(+1.77),BSCL2(-1.53),BTG3(-2.04),BTRC(+1.67),BUB1B(+1.96),C3orf52(+2.26),C6orf62(-1.69),CBX7(-1.96),CCL2(+2.16),CD44(+3.93),CDC42EP3(+2.0),CDC6(+2.07),CDH1(+3.1),CDH23(-1.49),CDKN1A…
Cell Morphology	Sprouting	1.47e-16	Increased	4.154	117	102	15	A2M(+4.05),ADCYAP1(+4.25),ADGRB1(+2.1),ANG(-3.03),ANGPT1(+5.6),ANGPTL2(+2.25),ANXA2(+1.65),APBA1(+2.1),AQP1(+2.14),ARHGAP33(+2.31),BMP4(+1.85),BSN(+2.15),CALD1(+1.68),CAMK2B(+3.05),CAMKK2(+2.21),CCL2(+2.16),CD44(+3.93),CDH1(+3.1),CDK5R1(+2.97),CDKN1A(-2.32),CHN1(-1.64),CHRM2(+1.92),CHRNA7(+1.94),CHRNB2(+2.52),CNR1(+8.01),COL25A1(+3.53),CRMP1(+1.96),DACT1(+2.82),DCN(+24.15),DCX(+1.97),DOCK1(+1.85)…
Cancer,Organismal Injury and Abnormalities	Sarcoma	1.64e-16		1.002	264	205	59	ABCA12(+2.54),ABCC4(-2.19),ABCC5(+1.68),ACP5(-2.76),ADAM9(-1.69),ADAMTS5(+2.45),ADAMTSL3(+10.28),ADARB2(+3.39),AGER(-1.91),AKAP6(+1.88),ALDH1A3(+3.21),ALK(+3.89),ANKRD26(-1.77),AP3B2(+2.89),ASPN(+14.68),ASS1(+2.45),ATL3(+1.78),ATP8A2(+2.14),AXIN2(+3.19),BIRC5(+2.19),BMP4(+1.85),BRCA1(+1.77),BSN(+2.15),BUB1B(+1.96),C3orf52(+2.26),CACNA1B(-1.83),CACNA1E(+4.04),CACNA1G(+2.29),CCDC88B(-4.67),CD44(+3.…
Cancer,Endocrine System Disorders,Organismal Injury and Abnormalities,Reproductive System Disease	Ovarian adenocarcinoma	1.84e-16			303	234	69	ABCA12(+2.54),ABCA8(+3.17),ABCC4(-2.19),ACP5(-2.76),ADAMTS10(+3.13),ADAMTS19(+3.87),ADAMTS20(+2.39),ADAMTSL3(+10.28),ADCY1(+3.35),ADCY2(-1.72),ADCYAP1R1(+5.81),ADD2(+2.03),AFF3(+1.85),AIF1(-4.76),AKAP2(+2.04),AKAP6(+1.88),ALKBH7(-1.81),AMOTL1(+1.8),ANGPT1(+5.6),ANKRD24(-3.32),ANKRD50(+1.66),AOPEP(+1.65),APCDD1(+15.97),ARHGEF40(+1.86),ASPM(+2.11),ATP8A1(+3.33),ATP8A2(+2.14),AXIN2(+3.19),BRCA1(+1.7…
Tissue Development	Organization of extracellular matrix	1.88e-16			71	65	6	A2M(+4.05),ADAM12(+3.56),ADAMTS20(+2.39),ADAMTS5(+2.45),BMP1(+1.86),CAPN1(+1.7),CCDC80(+1.98),CD44(+3.93),CDH1(+3.1),COL13A1(+2.88),COL16A1(+5.19),COL1A1(+3.04),COL27A1(+1.86),COL2A1(+1.9),COL3A1(+8.18),COL5A1(+2.19),COL6A2(+1.72),COL8A2(+5.86),COL9A1(+1.52),COL9A2(+2.15),COL9A3(+4.01),CRISPLD2(+7.46),CTSV(+2.48),DCN(+24.15),DDR1(-1.74),DDR2(+4.69),EGFL6(+1.62),EGFLAM(+7.09),EMILIN1(+5.93),ETS1(+…
Cardiovascular System Development and Function,Organismal Development	Angiogenesis	2.52e-16	Increased	2.749	221	163	58	ABCC8(+4.12),ADAM12(+3.56),ADAM9(-1.69),ADAMTS8(+1.83),ADGRB1(+2.1),ADGRG1(-1.62),AGER(-1.91),AHR(+3.68),AIF1(-4.76),ALCAM(+3.09),ALOX15(-2.39),AMIGO2(+3.9),ANG(-3.03),ANGPT1(+5.6),ANGPTL2(+2.25),ANXA2(+1.65),AQP1(+2.14),ATOH8(+2.32),AXL(-1.57),BIRC5(+2.19),BMP4(+1.85),BMPER(+5.67),BMPR2(+2.38),BRCA1(+1.77),CAPN1(+1.7),CBS/CBSL(+2.37),CCL2(+2.16),CCN3(+4.98),CD44(+3.93),CDH1(+3.1),CDKN1A(-2.32),C…
Nervous System Development and Function,Neurological Disease,Organ Morphology,Organismal Development,Organismal Injury and Abnormalities	Abnormal morphology of brain	2.93e-16			122	90	32	ADCY1(+3.35),ADCY3(+1.72),ALK(+3.89),ARX(-5.71),ASCL1(+5.3),ASPM(+2.11),ATP1B2(-1.79),AXL(-1.57),B4GALNT1(+3.19),BHLHE22(+5.15),BRINP1(+3.57),BRSK1(-1.69),BRSK2(+2.27),CBLN1(+5.11),CDK5R1(+2.97),CDON(+1.56),CELSR2(-1.92),CEP290(-1.67),CHL1(+2.12),CHN1(-1.64),CHRNA7(+1.94),CHRNB2(+2.52),CNTN1(+3.34),COL2A1(+1.9),CRMP1(+1.96),CTSV(+2.48),CUX2(+1.74),CXCR4(+2.78),DAB1(+2.05),DCLK1(+4.51),DISP1(+1.61…
Organismal Development	Development of genitourinary system	3.34e-16		0.843	223	149	74	ABCC4(-2.19),ACOT13(-1.8),ACRBP(-2.32),ADCYAP1(+4.25),ADGRG2(+3.87),AFAP1(+2.7),AGER(-1.91),AHR(+3.68),ALDH1A3(+3.21),ALK(+3.89),ALKBH5(-2.1),ANGPT1(+5.6),ANXA2(+1.65),AQP1(+2.14),ARRB1(+2.62),ARSB(+1.72),ARX(-5.71),ASPM(+2.11),AXL(-1.57),B4GALNT1(+3.19),BICC1(+4.24),BMF(+1.59),BMP4(+1.85),BMP5(+3.06),BRCA1(+1.77),BRIP1(+2.46),BSCL2(-1.53),BSX(+7.77),BTRC(+1.67),CBS/CBSL(+2.37),CD44(+3.93),CDC25A…
Cancer,Organismal Injury and Abnormalities	Secondary tumor	3.35e-16		1.629	220	162	58	ABLIM1(+1.7),ACP5(-2.76),ADAM12(+3.56),ADAM9(-1.69),AFAP1-AS1(+1.93),AGER(-1.91),ALCAM(+3.09),ALK(+3.89),ANGPTL2(+2.25),ANXA2(+1.65),AQP1(+2.14),AXIN2(+3.19),AXL(-1.57),BBC3(-1.77),BIRC5(+2.19),BMP4(+1.85),BMPR2(+2.38),BRCA1(+1.77),BRIP1(+2.46),C1orf61(+7.51),C4A/C4B(+2.69),CALD1(+1.68),CCDC80(+1.98),CCL2(+2.16),CCN4(+3.55),CD44(+3.93),CDC25A(+1.75),CDH1(+3.1),CDK5RAP3(-1.65),CDK6(+2.2),CDKN1A(-2…
Cancer,Organismal Injury and Abnormalities	Malignant connective or soft tissue neoplasm	4.05e-16		0.827	266	207	59	ABCA12(+2.54),ABCC4(-2.19),ABCC5(+1.68),ACP5(-2.76),ADAM9(-1.69),ADAMTS5(+2.45),ADAMTSL3(+10.28),ADARB2(+3.39),AGER(-1.91),AKAP6(+1.88),ALDH1A3(+3.21),ALK(+3.89),ANGPT1(+5.6),ANKRD26(-1.77),AP3B2(+2.89),ASPN(+14.68),ASS1(+2.45),ATL3(+1.78),ATP8A2(+2.14),AXIN2(+3.19),BIRC5(+2.19),BMP4(+1.85),BRCA1(+1.77),BSN(+2.15),BUB1B(+1.96),C3orf52(+2.26),CACNA1B(-1.83),CACNA1E(+4.04),CACNA1G(+2.29),CCDC88B(-4…
Cellular Development,Cellular Growth and Proliferation,Nervous System Development and Function,Tissue Development	Proliferation of neuronal cells	4.76e-16	Increased	5.508	142	114	28	A2M(+4.05),ADCYAP1(+4.25),ADCYAP1R1(+5.81),AGER(-1.91),ALK(+3.89),ANGPT1(+5.6),APEX1(+1.71),ARHGAP33(+2.31),ARX(-5.71),ASCL1(+5.3),ASPM(+2.11),BMP4(+1.85),BRSK1(-1.69),BRSK2(+2.27),BTG3(-2.04),CABLES1(+2.44),CAMK2B(+3.05),CAMKK2(+2.21),CCL2(+2.16),CDK5R1(+2.97),CDKN1A(-2.32),CHL1(+2.12),CHN1(-1.64),CNR1(+8.01),CNTN2(+4.37),CRMP1(+1.96),CXCR4(+2.78),DCLK1(+4.51),DCT(+10.71),DCX(+1.97),DDR1(-1.74),…
Cancer,Hematological Disease,Immunological Disease,Organismal Injury and Abnormalities	Non-Hodgkin lymphoma	5.11e-16	Decreased	-2.161	244	185	59	ABCC9(+2.43),ADAM9(-1.69),ADAMTSL3(+10.28),AHR(+3.68),ALK(+3.89),AMOTL1(+1.8),ANKRD50(+1.66),ANXA2(+1.65),APBA1(+2.1),APBA3(-1.67),ASAP2(+1.65),ATP10A(+2.87),BBC3(-1.77),BCHE(+2.65),BCL11B(+4.28),BICC1(+4.24),BIRC5(+2.19),BMF(+1.59),BNC2(+3.43),BRCA1(+1.77),BRIP1(+2.46),BRSK1(-1.69),BSCL2(-1.53),C1QTNF1(+4.31),CALD1(+1.68),CCL2(+2.16),CCNA2(+1.74),CD101(+2.64),CD44(+3.93),CDC25B(+2.16),CDCA2(+1.8…
Cancer,Organismal Injury and Abnormalities	Soft tissue neoplasm	5.24e-16		0.067	230	178	52	ABCA12(+2.54),ABCC5(+1.68),ADAM9(-1.69),ADAMTSL3(+10.28),ADARB2(+3.39),AKAP6(+1.88),ALDH1A3(+3.21),ALK(+3.89),ANGPT1(+5.6),ANKRD26(-1.77),ANO1(+5.01),AP3B2(+2.89),ASPN(+14.68),ASS1(+2.45),ATL3(+1.78),ATP8A2(+2.14),ATP9A(+1.56),AXIN2(+3.19),BIRC5(+2.19),BMPR1B(-2.97),BRCA1(+1.77),BUB1B(+1.96),C3orf52(+2.26),CACNA1B(-1.83),CACNA1G(+2.29),CALB2(+6.38),CCDC88B(-4.67),CD44(+3.93),CDH1(+3.1),CDH22(+3.9…
Nervous System Development and Function,Tissue Morphology	Quantity of neurons	1.05e-15	Increased	4.658	116	91	25	A2M(+4.05),ADCYAP1(+4.25),AGER(-1.91),ARSB(+1.72),ARX(-5.71),ASCL1(+5.3),BMP4(+1.85),BMPR1B(-2.97),BOC(+1.7),BSN(+2.15),CACNA1C(+3.21),CACNA1G(+2.29),CACNA2D1(+3.79),CDH23(-1.49),CDK5R1(+2.97),CDKN1A(-2.32),CHRNB2(+2.52),CNTN2(+4.37),COL25A1(+3.53),CRX(+5.29),CUX2(+1.74),CXCR4(+2.78),DCLK1(+4.51),DLX2(+2.73),DPYSL4(+1.81),E2F1(+2.7),EBF2(+3.88),EGFR(+2.45),EMX2(-1.97),EPHB1(+2.81),ERBB3(+2.29),FE…
Cell Cycle	Cell cycle progression	1.45e-15	Increased	2.277	234	174	60	ACRBP(-2.32),ADAM12(+3.56),ADARB1(+1.73),ADCY2(-1.72),ADCYAP1(+4.25),AHR(+3.68),AIF1(-4.76),ALK(+3.89),ANGPTL2(+2.25),ARRB1(+2.62),ARSB(+1.72),ARX(-5.71),ASCL1(+5.3),AXL(-1.57),BIRC5(+2.19),BMP4(+1.85),BMPR1B(-2.97),BMPR2(+2.38),BORA(-1.95),BRCA1(+1.77),BRINP1(+3.57),BRINP2(+3.07),BRINP3(+6.4),BTG3(-2.04),BTRC(+1.67),BUB1B(+1.96),C1orf61(+7.51),CABLES1(+2.44),CALD1(+1.68),CBX7(-1.96),CCNA2(+1.74)…
Cancer,Dermatological Diseases and Conditions,Organismal Injury and Abnormalities	Skin carcinoma	2.18e-15		0.603	264	222	42	ABCA12(+2.54),ABCC9(+2.43),ADAM12(+3.56),ADAMTS10(+3.13),ADAMTS20(+2.39),ADAMTSL3(+10.28),ADD2(+2.03),AFF3(+1.85),AKAP2(+2.04),AKAP6(+1.88),ANGPT1(+5.6),ANGPTL2(+2.25),ANK2(+2.8),ANKRD26(-1.77),ANKS1B(+2.02),ARAP2(+1.94),ARSB(+1.72),ASPM(+2.11),ATOH8(+2.32),ATP10A(+2.87),AXL(-1.57),B3GALT5(+2.24),BACH2(+1.83),BCL11B(+4.28),BRCA1(+1.77),BRINP2(+3.07),BRINP3(+6.4),BSN(+2.15),CACNA1C(+3.21),CACNA1E(…
Cellular Growth and Proliferation,Tissue Development	Proliferation of epithelial cells	2.2e-15		1.387	129	103	26	AHR(+3.68),ALK(+3.89),BCL11B(+4.28),BMP4(+1.85),BMP5(+3.06),BRCA1(+1.77),BTRC(+1.67),CALB2(+6.38),CD109(+2.35),CD44(+3.93),CDC25A(+1.75),CDC25B(+2.16),CDH1(+3.1),CDK6(+2.2),CDKN1A(-2.32),CDKN1C(-1.78),CHGA(+14.1),CHRM3(+2.33),CNR1(+8.01),COL8A2(+5.86),CSMD3(+3.28),CTSV(+2.48),CXCL14(+1.96),CXCR4(+2.78),DAB2(+1.76),DLC1(+2.74),E2F1(+2.7),EAF2(-4.18),EDNRA(+9.03),EDNRB(-4.04),EGFR(+2.45),EPAS1(+2.7…
Cancer,Organismal Injury and Abnormalities,Reproductive System Disease	Female genital tract serous carcinoma	2.35e-15			107	84	23	ABCA8(+3.17),ACP5(-2.76),ANXA2(+1.65),AQP1(+2.14),AXIN2(+3.19),BRCA1(+1.77),BUB1B(+1.96),C4A/C4B(+2.69),CACNA1C(+3.21),CALB2(+6.38),CBS/CBSL(+2.37),CCNA2(+1.74),CCNB1(+1.58),CDC6(+2.07),CDH1(+3.1),CDKN1A(-2.32),CENPA(+2.09),CFH(+16.28),CLDN3(-2.47),COL14A1(+4.09),COL15A1(+2.47),COL3A1(+8.18),COL5A1(+2.19),COL6A2(+1.72),CRABP1(-3.88),CTNNAL1(+1.6),DAB2(+1.76),DDR2(+4.69),DYNC1I1(+2.53),E2F3(+1.56)…
Cancer,Organismal Injury and Abnormalities	Development of neuroepithelial tumor	2.43e-15		0.356	244	185	59	ABCA8(+3.17),ABCC9(+2.43),ADAMTS5(+2.45),ADAMTS8(+1.83),ADARB1(+1.73),ADCY8(+3.77),ADGRB1(+2.1),ADGRD1(-2.98),ADGRG1(-1.62),AK5(+2.51),AKAP2(+2.04),ALCAM(+3.09),ALDOA(-1.51),ALDOC(-3.65),ALK(+3.89),ANGPT1(+5.6),ANK2(+2.8),ANO2(+4.77),APOL4(+2.77),ARF4(-2.49),ARHGAP33(+2.31),ARRB1(+2.62),ASPM(+2.11),ASTN2(+1.88),ATF5(+2.66),ATP1B1(-2.11),AXIN2(+3.19),BCL11A(+3.04),BIRC5(+2.19),BMF(+1.59),BOC(+1.7)…
Cell Morphology,Nervous System Development and Function,Neurological Disease,Tissue Morphology	Abnormal morphology of neurons	2.52e-15			130	102	28	ADCYAP1(+4.25),ARX(-5.71),ASCL1(+5.3),B4GALNT1(+3.19),BMPR1B(-2.97),BRINP1(+3.57),BRSK1(-1.69),BRSK2(+2.27),CACNA1C(+3.21),CACNA1F(-3.83),CADPS(+1.95),CAMKK2(+2.21),CBLN1(+5.11),CDH23(-1.49),CDK5R1(+2.97),CFH(+16.28),CHL1(+2.12),CHRNA7(+1.94),CHRNB2(+2.52),CLCN6(-2.63),CNGA3(+5.89),CNTN1(+3.34),COL13A1(+2.88),COL25A1(+3.53),COL8A2(+5.86),CRMP1(+1.96),CRX(+5.29),DACT1(+2.82),DCLK1(+4.51),DCX(+1.97…
Neurological Disease	Progressive motor neuropathy	2.52e-15		-0.152	138	102	36	ABCA8(+3.17),ACTN3(-4.12),AK5(+2.51),ALCAM(+3.09),ANG(-3.03),ANXA2(+1.65),ARRB1(+2.62),ASCL1(+5.3),AXL(-1.57),BCHE(+2.65),BRINP1(+3.57),BST2(-3.56),C4A/C4B(+2.69),C9orf72(-2.4),CACNA1B(-1.83),CACNA1C(+3.21),CALM1 (includes others)(+1.49),CCL2(+2.16),CD44(+3.93),CDC42EP3(+2.0),CDKN1A(-2.32),CHCHD10(-1.98),CHGA(+14.1),CHGB(+5.21),CHRM2(+1.92),CHRM3(+2.33),CHRNA7(+1.94),CHRNB2(+2.52),CNR1(+8.01),COL…
Organismal Injury and Abnormalities,Renal and Urological Disease	Formation of renal lesion	5.43e-15		0.152	219	161	58	ADCY2(-1.72),AGER(-1.91),AKAP2(+2.04),ANK2(+2.8),ANXA2(+1.65),ARAP2(+1.94),ARFGEF3(-1.73),ARX(-5.71),ASPM(+2.11),AXIN2(+3.19),AXL(-1.57),BPGM(-1.82),BRCA1(+1.77),BSCL2(-1.53),BTG3(-2.04),BTRC(+1.67),BUB1B(+1.96),C3orf52(+2.26),C6orf62(-1.69),CBX7(-1.96),CCL2(+2.16),CD44(+3.93),CDC42EP3(+2.0),CDC6(+2.07),CDH1(+3.1),CDH23(-1.49),CDKN1A(-2.32),CENPF(+1.71),CENPU(+2.42),CHRNA5(+2.29),CNTN2(+4.37),COL…
Cancer,Hematological Disease,Immunological Disease,Organismal Injury and Abnormalities	Mature B-cell neoplasm	5.48e-15			263	196	67	ABCC9(+2.43),ACP5(-2.76),ADAM9(-1.69),ADAMTSL3(+10.28),ADD2(+2.03),ADGRB1(+2.1),AHR(+3.68),ALK(+3.89),ANK2(+2.8),ANKH(+1.95),ANKRD50(+1.66),ANXA2(+1.65),APBA1(+2.1),APBA3(-1.67),ARHGAP33(+2.31),ASAP2(+1.65),ATP10A(+2.87),ATP1B1(-2.11),ATRNL1(+1.51),BACH2(+1.83),BBC3(-1.77),BCHE(+2.65),BCL11A(+3.04),BCL11B(+4.28),BICC1(+4.24),BIRC5(+2.19),BMF(+1.59),BMPER(+5.67),BNC2(+3.43),BRCA1(+1.77),BRSK1(-1.6…
Neurological Disease,Organismal Injury and Abnormalities	Epilepsy	7.07e-15		-1.041	98	82	16	ABCC5(+1.68),ABCC8(+4.12),ADCYAP1(+4.25),AOPEP(+1.65),AP3B2(+2.89),ARX(-5.71),BBC3(-1.77),BSN(+2.15),C11orf96(+3.38),C4A/C4B(+2.69),CA4(-6.57),CACNA1B(-1.83),CACNA1C(+3.21),CACNA1G(+2.29),CACNA2D1(+3.79),CACNA2D3(+5.28),CACNA2D4(+4.85),CDKN1A(-2.32),CEBPD(+2.36),CEMIP(+3.39),CHGB(+5.21),CHRNA7(+1.94),CHRNB2(+2.52),CNRIP1(+3.75),CNTN2(+4.37),CRYM(+4.04),CUX2(+1.74),CXCR4(+2.78),CYP2C8(+2.62),DCX(+…
Connective Tissue Disorders,Inflammatory Disease,Organismal Injury and Abnormalities,Skeletal and Muscular Disorders	Rheumatic Disease	7.33e-15		0.481	276	193	83	ACSL3(-1.86),ADAM12(+3.56),ADAM9(-1.69),ADAMTS10(+3.13),ADAMTS14(+3.43),ADAMTS17(+4.3),ADAMTS19(+3.87),ADAMTS20(+2.39),ADAMTS5(+2.45),ADARB1(+1.73),ADCY8(+3.77),ADIPOR1(-1.58),AGER(-1.91),AHR(+3.68),AIF1(-4.76),ALDOA(-1.51),ALOX15(-2.39),ANG(-3.03),ANKH(+1.95),ARAP2(+1.94),ARF1(-1.49),ARHGAP33(+2.31),ARRB1(+2.62),ASPN(+14.68),ATP1B1(-2.11),ATP8A1(+3.33),AXL(-1.57),BIRC5(+2.19),BMP1(+1.86),BMP4(+1…
Cancer,Neurological Disease,Organismal Injury and Abnormalities	Glioma	8.29e-15		-0.041	241	183	58	ABCA8(+3.17),ABCC9(+2.43),ADAMTS5(+2.45),ADAMTS8(+1.83),ADARB1(+1.73),ADCY8(+3.77),ADGRB1(+2.1),ADGRD1(-2.98),ADGRG1(-1.62),AK5(+2.51),AKAP2(+2.04),ALCAM(+3.09),ALDOA(-1.51),ALDOC(-3.65),ALK(+3.89),ANGPT1(+5.6),ANK2(+2.8),ANO2(+4.77),APOL4(+2.77),ARF4(-2.49),ARHGAP33(+2.31),ARRB1(+2.62),ASPM(+2.11),ASTN2(+1.88),ATF5(+2.66),ATP1B1(-2.11),AXIN2(+3.19),BCL11A(+3.04),BIRC5(+2.19),BMF(+1.59),BOC(+1.7)…
Neurological Disease	Progressive neurological disorder	9.98e-15		-0.931	154	112	42	ABCA8(+3.17),ACTN3(-4.12),AK5(+2.51),ALCAM(+3.09),ANG(-3.03),ANXA2(+1.65),ARRB1(+2.62),ARX(-5.71),ASCL1(+5.3),AXL(-1.57),B4GALNT1(+3.19),BCHE(+2.65),BIRC5(+2.19),BRINP1(+3.57),BSCL2(-1.53),BST2(-3.56),C4A/C4B(+2.69),C9orf72(-2.4),CACNA1B(-1.83),CACNA1C(+3.21),CALM1 (includes others)(+1.49),CCL2(+2.16),CD44(+3.93),CDC42EP3(+2.0),CDKN1A(-2.32),CHCHD10(-1.98),CHGA(+14.1),CHGB(+5.21),CHRM2(+1.92),CHR…
Embryonic Development,Organismal Development	Morphogenesis of embryo	1.01e-14		0.935	73	56	17	AFF3(+1.85),ALDH1A3(+3.21),BMP4(+1.85),BMPR1B(-2.97),BMPR2(+2.38),CACNA1C(+3.21),CD44(+3.93),CDON(+1.56),CHST11(+1.74),COL2A1(+1.9),CRABP2(-1.58),CTNNBIP1(+1.87),DACT1(+2.82),DCHS1(+1.75),EGFR(+2.45),EMX2(-1.97),EPHA2(-1.74),FGFR1(+1.86),FGFRL1(-1.69),FZD1(+1.9),GAS1(+3.38),GREM1(-1.83),GZF1(-1.7),HEY1(+2.26),HEY2(+4.4),IRX3(+4.51),ISL1(+4.84),LEF1(+2.55),LMX1B(+7.02),LRP4(+1.89),MAB21L2(+2.12),M…
Cancer,Organismal Injury and Abnormalities	Liquid tumor	1.12e-14		0.19	418	322	96	ABCA12(+2.54),ADAM12(+3.56),ADAMTS17(+4.3),ADAMTS5(+2.45),ADARB2(+3.39),ADCY1(+3.35),ADCY3(+1.72),ADCYAP1R1(+5.81),ADD2(+2.03),ADGRB1(+2.1),AFF3(+1.85),AKAP2(+2.04),ALK(+3.89),ALOX15(-2.39),ANGPT1(+5.6),ANGPTL2(+2.25),ANK2(+2.8),ANKH(+1.95),ANKRD26(-1.77),ANKS1B(+2.02),ANO2(+4.77),ANO4(+2.57),ANXA2(+1.65),APCDD1(+15.97),APEX1(+1.71),ARHGAP31(+4.04),ARHGAP33(+2.31),ATL1(+2.14),ATP1B1(-2.11),ATP8A2…
Cardiovascular Disease,Hereditary Disorder,Organismal Injury and Abnormalities	Familial vascular disease	1.2e-14	Decreased	-2.606	73	52	21	ADCY8(+3.77),BMPR1B(-2.97),BMPR2(+2.38),CA4(-6.57),CACNA1C(+3.21),CFH(+16.28),CFI(+2.44),COL1A1(+3.04),COL3A1(+8.18),COL5A1(+2.19),CPS1(-2.96),DCN(+24.15),DRD4(-3.01),ECE2(-2.4),EDNRA(+9.03),EDNRB(-4.04),ETS2(+2.51),F5(+4.74),FBN1(+1.56),FLVCR2(+2.25),GABRA3(+2.43),GABRB3(+4.19),GABRE(+2.41),GABRP(+8.82),GRIN2C(-2.81),HCN4(+2.06),HIST2H2AA3/HIST2H2AA4(+1.76),HMGB1(+1.72),HMGCR(-2.13),HTR2A(+3.27)…
Cancer,Organismal Injury and Abnormalities,Renal and Urological Disease	Development of renal tumor	1.27e-14			217	159	58	ADCY2(-1.72),AGER(-1.91),AKAP2(+2.04),ANK2(+2.8),ANXA2(+1.65),ARAP2(+1.94),ARFGEF3(-1.73),ARX(-5.71),ASPM(+2.11),AXIN2(+3.19),AXL(-1.57),BPGM(-1.82),BRCA1(+1.77),BSCL2(-1.53),BTG3(-2.04),BTRC(+1.67),BUB1B(+1.96),C3orf52(+2.26),C6orf62(-1.69),CBX7(-1.96),CCL2(+2.16),CD44(+3.93),CDC42EP3(+2.0),CDC6(+2.07),CDH1(+3.1),CDH23(-1.49),CDKN1A(-2.32),CENPF(+1.71),CENPU(+2.42),CHRNA5(+2.29),CNTN2(+4.37),COL…
Cell Morphology,Nervous System Development and Function	Innervation	1.28e-14	Increased	2.629	51	43	8	ADARB1(+1.73),ADCY3(+1.72),BMP4(+1.85),BMPR2(+2.38),BOC(+1.7),CACNA1F(-3.83),CBLN1(+5.11),CCDC141(+4.04),CDK5R1(+2.97),CHN1(-1.64),COL25A1(+3.53),EGFR(+2.45),EOMES(+2.75),FGFR3(-2.34),FRZB(+4.89),GABRB3(+4.19),GAP43(+4.63),GFRA2(+7.05),GRIA2(+6.74),GRID2(+6.81),ISL1(+4.84),ITGA4(+4.92),KCNMA1(+2.17),LMX1B(+7.02),NEUROG2(+5.17),NFATC2(+2.1),NOS1(+2.43),NOS3(-5.35),NPTX2(+2.67),NPTXR(+1.92),NR2F1(-…
Embryonic Development,Nervous System Development and Function,Organ Development,Organismal Development,Tissue Development	Formation of forebrain	1.36e-14		0.787	72	54	18	ADCYAP1R1(+5.81),ALDH1A3(+3.21),ARX(-5.71),ASCL1(+5.3),AXL(-1.57),BHLHE22(+5.15),BMP4(+1.85),BMP5(+3.06),CDK5R1(+2.97),CDK6(+2.2),CHRNB2(+2.52),COL2A1(+1.9),CRELD1(-2.41),CTNNBIP1(+1.87),CXCR4(+2.78),DAB1(+2.05),DCLK1(+4.51),DLC1(+2.74),DLX2(+2.73),E2F1(+2.7),EBF2(+3.88),EBF3(+4.04),EMX1(+3.76),EMX2(-1.97),EOMES(+2.75),FEZF1(-11.57),FEZF2(-3.35),FGFR3(-2.34),FGFRL1(-1.69),FOXP2(+5.5),GAP43(+4.63)…
Cell Morphology,Cellular Development	Branching of cells	1.47e-14	Increased	4.504	108	96	12	A2M(+4.05),ADCYAP1(+4.25),ADGRB1(+2.1),AHR(+3.68),ANG(-3.03),ANGPT1(+5.6),ANGPTL2(+2.25),ANXA2(+1.65),APBA1(+2.1),AQP1(+2.14),ARHGAP33(+2.31),BMP4(+1.85),BSN(+2.15),CALD1(+1.68),CAMK2B(+3.05),CAMKK2(+2.21),CCL2(+2.16),CD44(+3.93),CDH1(+3.1),CDK5R1(+2.97),CDKN1A(-2.32),CHN1(-1.64),CHRNA7(+1.94),CHRNB2(+2.52),CNR1(+8.01),COL25A1(+3.53),CRMP1(+1.96),DACT1(+2.82),DCN(+24.15),DCX(+1.97),DOCK1(+1.85),D…
Cancer,Hematological Disease,Immunological Disease,Organismal Injury and Abnormalities	Lymphoma	1.64e-14	Decreased	-2.373	276	207	69	ABCC9(+2.43),ADAM9(-1.69),ADAMTSL3(+10.28),AHR(+3.68),ALK(+3.89),AMOTL1(+1.8),ANKRD50(+1.66),ANXA2(+1.65),APBA1(+2.1),APBA3(-1.67),ASAP2(+1.65),ATP10A(+2.87),BBC3(-1.77),BCHE(+2.65),BCL11B(+4.28),BICC1(+4.24),BIRC5(+2.19),BMF(+1.59),BNC2(+3.43),BRCA1(+1.77),BRIP1(+2.46),BRSK1(-1.69),BSCL2(-1.53),BST2(-3.56),BUB1B(+1.96),C1QTNF1(+4.31),CALD1(+1.68),CCL2(+2.16),CCNA2(+1.74),CD101(+2.64),CD44(+3.93)…
Cell Death and Survival	Cell death of tumor cell lines	1.65e-14		-0.227	327	230	97	ABCC4(-2.19),ADIPOR1(-1.58),AFAP1(+2.7),AFAP1-AS1(+1.93),AGER(-1.91),AHR(+3.68),ALCAM(+3.09),ALK(+3.89),ALOX15(-2.39),ANG(-3.03),ANKRD1(-2.65),ANXA2(+1.65),APEX1(+1.71),ARSB(+1.72),ATF5(+2.66),AXL(-1.57),BACH2(+1.83),BBC3(-1.77),BCHE(+2.65),BIRC5(+2.19),BMF(+1.59),BMP4(+1.85),BMPR1B(-2.97),BNIP3(-1.92),BOK(+2.12),BRCA1(+1.77),BRINP1(+3.57),BTG3(-2.04),BTRC(+1.67),BUB1B(+1.96),CABLES1(+2.44),CACNA…
Tissue Development	Growth of epithelial tissue	1.8e-14		1.379	166	130	36	ADAMTS8(+1.83),AGER(-1.91),AHR(+3.68),ALK(+3.89),ANG(-3.03),ANGPT1(+5.6),ATOH8(+2.32),AXL(-1.57),BCL11B(+4.28),BMP4(+1.85),BMP5(+3.06),BMPER(+5.67),BMPR2(+2.38),BRCA1(+1.77),BTRC(+1.67),CALB2(+6.38),CCL2(+2.16),CD109(+2.35),CD44(+3.93),CDC25A(+1.75),CDC25B(+2.16),CDH1(+3.1),CDK6(+2.2),CDKN1A(-2.32),CDKN1C(-1.78),CHGA(+14.1),CHRM3(+2.33),CNR1(+8.01),COL1A1(+3.04),COL8A2(+5.86),CSMD3(+3.28),CTSV(+2…
Cancer,Organismal Injury and Abnormalities,Renal and Urological Disease	Renal cell carcinoma	1.93e-14			216	158	58	ADCY2(-1.72),AGER(-1.91),AKAP2(+2.04),ANK2(+2.8),ANXA2(+1.65),ARAP2(+1.94),ARFGEF3(-1.73),ARX(-5.71),ASPM(+2.11),AXIN2(+3.19),AXL(-1.57),BPGM(-1.82),BRCA1(+1.77),BSCL2(-1.53),BTG3(-2.04),BTRC(+1.67),BUB1B(+1.96),C3orf52(+2.26),C6orf62(-1.69),CBX7(-1.96),CCL2(+2.16),CD44(+3.93),CDC42EP3(+2.0),CDC6(+2.07),CDH1(+3.1),CDH23(-1.49),CDKN1A(-2.32),CENPF(+1.71),CENPU(+2.42),CHRNA5(+2.29),CNTN2(+4.37),COL…
Cancer,Hematological Disease,Immunological Disease,Organismal Injury and Abnormalities	B-cell neoplasm	1.95e-14		0.508	277	205	72	ABCC9(+2.43),ACP5(-2.76),ADAM9(-1.69),ADAMTSL3(+10.28),ADD2(+2.03),ADGRB1(+2.1),AHR(+3.68),ALK(+3.89),ANK2(+2.8),ANKH(+1.95),ANKRD50(+1.66),ANXA2(+1.65),APBA1(+2.1),APBA3(-1.67),ARHGAP33(+2.31),ASAP2(+1.65),ATP10A(+2.87),ATP1B1(-2.11),ATRNL1(+1.51),BACH2(+1.83),BBC3(-1.77),BCHE(+2.65),BCL11A(+3.04),BCL11B(+4.28),BICC1(+4.24),BIRC5(+2.19),BMF(+1.59),BMPER(+5.67),BNC2(+3.43),BRCA1(+1.77),BRSK1(-1.6…
Hereditary Disorder,Neurological Disease,Organismal Injury and Abnormalities,Psychological Disorders,Skeletal and Muscular Disorders	Huntington Disease	1.98e-14			136	88	48	A2M(+4.05),ACTN3(-4.12),ADCY2(-1.72),ADGRD1(-2.98),AQP1(+2.14),ASCL1(+5.3),ATP1B1(-2.11),B4GALNT1(+3.19),BCL11B(+4.28),C4A/C4B(+2.69),CACNA1F(-3.83),CACNA2D3(+5.28),CAMK2B(+3.05),CAMKK2(+2.21),CD44(+3.93),CDK5R1(+2.97),CDKN1C(-1.78),CHGB(+5.21),CHN1(-1.64),CHRM2(+1.92),CHRM3(+2.33),CNR1(+8.01),CPLX2(+1.98),CRX(+5.29),CRYM(+4.04),CYP51A1(-1.69),DAD1(-1.61),DDIT3(-2.04),DDX60L(+2.17),DHCR7(-1.88),D…
Psychological Disorders	Schizophrenia or schizoaffective disorder	2.27e-14			119	103	16	ABLIM3(+3.62),ACSBG1(-3.4),ALDOC(-3.65),APOL4(+2.77),ATP1A3(+2.61),BCHE(+2.65),C4A/C4B(+2.69),CA4(-6.57),CACNA1B(-1.83),CACNA1C(+3.21),CACNA1G(+2.29),CACNA2D1(+3.79),CACNA2D3(+5.28),CACNA2D4(+4.85),CALY(-2.89),CHRM2(+1.92),CHRM3(+2.33),CHRNA3(+3.24),CHRNA5(+2.29),CHRNA7(+1.94),CHRNB2(+2.52),CNR1(+8.01),COL3A1(+8.18),CPLX2(+1.98),CRYM(+4.04),CSMD1(+6.16),CUX2(+1.74),CYP2E1(-2.25),DAB1(+2.05),DDR1(…
Cancer,Organismal Injury and Abnormalities	Soft tissue sarcoma	2.43e-14		-0.218	217	168	49	ABCA12(+2.54),ABCC5(+1.68),ADAM9(-1.69),ADAMTSL3(+10.28),ADARB2(+3.39),AKAP6(+1.88),ALDH1A3(+3.21),ALK(+3.89),ANKRD26(-1.77),AP3B2(+2.89),ASPN(+14.68),ASS1(+2.45),ATL3(+1.78),ATP8A2(+2.14),AXIN2(+3.19),BIRC5(+2.19),BRCA1(+1.77),BUB1B(+1.96),C3orf52(+2.26),CACNA1B(-1.83),CACNA1G(+2.29),CCDC88B(-4.67),CD44(+3.93),CDH1(+3.1),CDH22(+3.91),CDK6(+2.2),CDKN1A(-2.32),CFH(+16.28),CHD5(+3.82),CHRM2(+1.92),…
Respiratory Disease,Respiratory System Development and Function	Abnormal morphology of respiratory system	2.44e-14			83	64	19	ABCA12(+2.54),ALDH1A3(+3.21),ANO1(+5.01),ARRB1(+2.62),ARSB(+1.72),ASCL1(+5.3),BMP4(+1.85),BMPER(+5.67),BMPR2(+2.38),CBS/CBSL(+2.37),CDK2AP1(+2.27),CDKN1A(-2.32),CDO1(-1.69),CDON(+1.56),CHL1(+2.12),COL2A1(+1.9),COL3A1(+8.18),CTNNBIP1(+1.87),DCHS1(+1.75),DDR2(+4.69),DENND1B(+1.65),DHCR7(-1.88),DNASE2(-1.68),DOCK1(+1.85),EGFR(+2.45),ELK3(+2.33),EMX2(-1.97),EPAS1(+2.73),FBLN1(+4.81),FBN1(+1.56),FEZF1…
Digestive System Development and Function	Development of digestive system	2.76e-14		1.093	106	89	17	AHR(+3.68),ASPN(+14.68),ATP1B1(-2.11),AXIN2(+3.19),BCL11B(+4.28),BMP4(+1.85),BMP5(+3.06),BNC2(+3.43),CDON(+1.56),COL1A1(+3.04),COL2A1(+1.9),COL3A1(+8.18),DACT1(+2.82),DCHS1(+1.75),DCN(+24.15),DLX2(+2.73),EDAR(+2.88),EDARADD(+3.77),EDNRB(-4.04),EGFR(+2.45),EIF2AK3(-2.83),EPOR(-2.66),ERBB3(+2.29),FGF1(+2.78),FGFR1(+1.86),FGFR3(-2.34),FN1(+3.0),FOS(+2.02),FOXC1(+7.92),FOXF2(+7.89),FOXM1(+2.16),FOXO1…
Neurological Disease,Psychological Disorders	Schizophrenia	2.77e-14			118	102	16	ABLIM3(+3.62),ACSBG1(-3.4),ALDOC(-3.65),APOL4(+2.77),ATP1A3(+2.61),BCHE(+2.65),C4A/C4B(+2.69),CA4(-6.57),CACNA1B(-1.83),CACNA1C(+3.21),CACNA1G(+2.29),CACNA2D1(+3.79),CACNA2D3(+5.28),CACNA2D4(+4.85),CALY(-2.89),CHRM2(+1.92),CHRM3(+2.33),CHRNA3(+3.24),CHRNA5(+2.29),CHRNA7(+1.94),CHRNB2(+2.52),CNR1(+8.01),COL3A1(+8.18),CPLX2(+1.98),CRYM(+4.04),CSMD1(+6.16),CUX2(+1.74),CYP2E1(-2.25),DAB1(+2.05),DDR1(…
Organismal Development	Abnormal morphology of body cavity	2.88e-14			307	217	90	ABCA12(+2.54),ABCC4(-2.19),ABCC8(+4.12),ABCC9(+2.43),ACADL(+2.1),ADAM12(+3.56),ADAM9(-1.69),ADD2(+2.03),ADGRD1(-2.98),ADGRG1(-1.62),AGER(-1.91),AHR(+3.68),ALOX15(-2.39),ANGPT1(+5.6),ANK2(+2.8),ANKRD1(-2.65),APEX1(+1.71),ARFGEF3(-1.73),ARRB1(+2.62),ARSB(+1.72),ARX(-5.71),AXL(-1.57),BBC3(-1.77),BCL11A(+3.04),BCL11B(+4.28),BIRC5(+2.19),BMF(+1.59),BMP1(+1.86),BMP4(+1.85),BMPER(+5.67),BMPR1B(-2.97),BM…
Connective Tissue Development and Function,Connective Tissue Disorders,Organismal Injury and Abnormalities,Skeletal and Muscular Disorders,Skeletal and Muscular System Development and Function,Tissue Development	Abnormal morphology of bone	3.34e-14			113	84	29	ANKH(+1.95),ARSB(+1.72),BMP1(+1.86),BMP4(+1.85),BMPER(+5.67),BMPR1B(-2.97),BRCA1(+1.77),CCN3(+4.98),CDK20(-1.81),CDKN1A(-2.32),CDO1(-1.69),CDON(+1.56),CHPF(-1.59),COL27A1(+1.86),COL2A1(+1.9),COL9A1(+1.52),CREB3L2(+1.81),CTNNBIP1(+1.87),CTSV(+2.48),CYP27B1(-2.51),CYP51A1(-1.69),DACT1(+2.82),DCHS1(+1.75),DCN(+24.15),DDR1(-1.74),DDR2(+4.69),DLL1(-2.54),DLL3(+3.98),DLX2(+2.73),E2F1(+2.7),E2F3(+1.56),…
Cancer,Organismal Injury and Abnormalities,Renal and Urological Disease	Renal cancer	3.39e-14		-0.447	236	173	63	ADCY2(-1.72),AGER(-1.91),AKAP2(+2.04),ANK2(+2.8),ANXA2(+1.65),ARAP2(+1.94),ARFGEF3(-1.73),ARX(-5.71),ASPM(+2.11),AXIN2(+3.19),AXL(-1.57),BPGM(-1.82),BRCA1(+1.77),BSCL2(-1.53),BTG3(-2.04),BTRC(+1.67),BUB1B(+1.96),C3orf52(+2.26),C6orf62(-1.69),CBX7(-1.96),CCL2(+2.16),CD44(+3.93),CDC42EP3(+2.0),CDC6(+2.07),CDH1(+3.1),CDH23(-1.49),CDKN1A(-2.32),CENPF(+1.71),CENPU(+2.42),CHRNA5(+2.29),CNTN2(+4.37),COL…
Cell Morphology,Cellular Assembly and Organization,Cellular Development,Cellular Function and Maintenance,Cellular Growth and Proliferation,Nervous System Development and Function,Organismal Development,Tissue Development	Axonogenesis	3.68e-14	Increased	3.193	71	60	11	A2M(+4.05),ADCY1(+3.35),ADCY3(+1.72),ADGRB1(+2.1),ANGPT1(+5.6),ASCL1(+5.3),ATL1(+2.14),ATP8A2(+2.14),BCL11B(+4.28),BRSK1(-1.69),BRSK2(+2.27),CACNA1F(-3.83),CHN1(-1.64),CHRNB2(+2.52),CNTN2(+4.37),CNTN4(+3.64),COL25A1(+3.53),DAB1(+2.05),DCLK1(+4.51),DOCK7(+1.56),EPHB1(+2.81),ETV4(+2.16),FOS(+2.02),GALNS(+1.72),GAP43(+4.63),GOLGA2(-1.69),GRID2(+6.81),KALRN(+2.8),LMX1B(+7.02),LRP4(+1.89),LRRC4(+1.78)…
Nervous System Development and Function	Sensation	3.92e-14	Increased	2.07	89	71	18	ADCYAP1(+4.25),AGER(-1.91),AQP1(+2.14),ARRB1(+2.62),ASCL1(+5.3),ATP1A3(+2.61),BAMBI(+1.63),BARHL1(+2.44),BHLHE22(+5.15),BMP4(+1.85),CACNA1B(-1.83),CACNA1E(+4.04),CACNA2D1(+3.79),CACNA2D3(+5.28),CCDC141(+4.04),CDH1(+3.1),CDH23(-1.49),CDK5R1(+2.97),CEMIP(+3.39),CHRNB2(+2.52),CLCN6(-2.63),CNR1(+8.01),COL1A1(+3.04),COL2A1(+1.9),COL9A1(+1.52),CRYM(+4.04),CXCR4(+2.78),EDNRA(+9.03),EDNRB(-4.04),EML2(-2.…
Cancer,Organismal Injury and Abnormalities,Reproductive System Disease	Uterine serous papillary cancer	4.17e-14			65	53	12	ABCA8(+3.17),ANXA2(+1.65),AQP1(+2.14),BUB1B(+1.96),CACNA1C(+3.21),CBS/CBSL(+2.37),CCNA2(+1.74),CCNB1(+1.58),CDC6(+2.07),CENPA(+2.09),CLDN3(-2.47),COL14A1(+4.09),COL15A1(+2.47),COL3A1(+8.18),CRABP1(-3.88),DDR2(+4.69),DYNC1I1(+2.53),EDNRA(+9.03),EDNRB(-4.04),EMILIN1(+5.93),ENTPD1(-1.58),EPHA1(+2.49),ERBB3(+2.29),ESPL1(+2.25),ETV4(+2.16),FBLN1(+4.81),FBLN5(+3.95),FOXM1(+2.16),FRZB(+4.89),GAS1(+3.38)…
Cancer,Organismal Injury and Abnormalities,Renal and Urological Disease	Kidney carcinoma	4.33e-14			218	160	58	ADCY2(-1.72),AGER(-1.91),AKAP2(+2.04),ANK2(+2.8),ANXA2(+1.65),ARAP2(+1.94),ARFGEF3(-1.73),ARX(-5.71),ASPM(+2.11),AXIN2(+3.19),AXL(-1.57),BPGM(-1.82),BRCA1(+1.77),BSCL2(-1.53),BTG3(-2.04),BTRC(+1.67),BUB1B(+1.96),C3orf52(+2.26),C6orf62(-1.69),CBX7(-1.96),CCL2(+2.16),CD44(+3.93),CDC42EP3(+2.0),CDC6(+2.07),CDH1(+3.1),CDH23(-1.49),CDKN1A(-2.32),CENPF(+1.71),CENPU(+2.42),CHRNA5(+2.29),CNTN2(+4.37),COL…
Cancer,Organismal Injury and Abnormalities,Renal and Urological Disease	Renal tumor	4.44e-14		0	240	176	64	ADCY2(-1.72),AGER(-1.91),AKAP2(+2.04),ANK2(+2.8),ANXA2(+1.65),ARAP2(+1.94),ARFGEF3(-1.73),ARX(-5.71),ASPM(+2.11),AXIN2(+3.19),AXL(-1.57),BIRC5(+2.19),BPGM(-1.82),BRCA1(+1.77),BSCL2(-1.53),BTG3(-2.04),BTRC(+1.67),BUB1B(+1.96),C3orf52(+2.26),C6orf62(-1.69),CBX7(-1.96),CCL2(+2.16),CD44(+3.93),CDC42EP3(+2.0),CDC6(+2.07),CDH1(+3.1),CDH23(-1.49),CDKN1A(-2.32),CENPF(+1.71),CENPU(+2.42),CHRNA5(+2.29),CNT…
Cell Death and Survival	Neuronal cell death	4.63e-14		-1.26	161	127	34	A2M(+4.05),ADAM12(+3.56),ADARB1(+1.73),ADCY1(+3.35),ADCYAP1(+4.25),ADCYAP1R1(+5.81),AGER(-1.91),ALK(+3.89),ALOX15(-2.39),AMIGO2(+3.9),ANGPT1(+5.6),ARRB1(+2.62),ASCL1(+5.3),AXL(-1.57),B4GALNT1(+3.19),BARHL1(+2.44),BBC3(-1.77),BCL11B(+4.28),BIRC5(+2.19),BMP4(+1.85),BMPR1B(-2.97),BNIP3(-1.92),BOK(+2.12),CAMK2B(+3.05),CAPN1(+1.7),CCL2(+2.16),CCNB1(+1.58),CDC25A(+1.75),CDC25B(+2.16),CDC25C(+1.99),CDK5…
Cardiovascular System Development and Function,Organismal Development	Vasculogenesis	4.89e-14	Increased	2.33	181	136	45	ADAM9(-1.69),ADAMTS8(+1.83),ADGRB1(+2.1),AGER(-1.91),AHR(+3.68),AIF1(-4.76),ALCAM(+3.09),ALOX15(-2.39),AMIGO2(+3.9),ANG(-3.03),ANGPT1(+5.6),ANGPTL2(+2.25),ANXA2(+1.65),ATOH8(+2.32),AXL(-1.57),BIRC5(+2.19),BMP4(+1.85),BMPER(+5.67),BMPR2(+2.38),CAPN1(+1.7),CBS/CBSL(+2.37),CCL2(+2.16),CD44(+3.93),CDH1(+3.1),CDKN1A(-2.32),CHGA(+14.1),CLIC4(+1.64),CNR1(+8.01),COL13A1(+2.88),COL15A1(+2.47),COL1A1(+3.04…
Developmental Disorder,Embryonic Development,Organismal Development,Tissue Morphology	Abnormal morphology of embryo	5.24e-14			139	114	25	ALDH1A3(+3.21),APEX1(+1.71),ARRB1(+2.62),ASCL1(+5.3),BCL11B(+4.28),BMP1(+1.86),BMP4(+1.85),BMPER(+5.67),BMPR2(+2.38),BRCA1(+1.77),BRSK1(-1.69),BRSK2(+2.27),CACNA1C(+3.21),CDC25A(+1.75),CDH1(+3.1),CDK20(-1.81),CDK5R1(+2.97),CDKN1A(-2.32),CDON(+1.56),CENPU(+2.42),COL2A1(+1.9),CTNNBIP1(+1.87),CTSV(+2.48),CXCR4(+2.78),CYP51A1(-1.69),DAB1(+2.05),DAB2(+1.76),DACT1(+2.82),DAD1(-1.61),DCX(+1.97),DISP1(+1…
Connective Tissue Disorders,Inflammatory Disease,Inflammatory Response,Organismal Injury and Abnormalities,Skeletal and Muscular Disorders	Inflammation of joint	6.41e-14		0.143	224	155	69	ADAM12(+3.56),ADAM9(-1.69),ADAMTS10(+3.13),ADAMTS14(+3.43),ADAMTS17(+4.3),ADAMTS19(+3.87),ADAMTS20(+2.39),ADAMTS5(+2.45),ADCY8(+3.77),ADIPOR1(-1.58),AGER(-1.91),AHR(+3.68),AIF1(-4.76),ALDOA(-1.51),ALOX15(-2.39),ANG(-3.03),ANKH(+1.95),ARAP2(+1.94),ARF1(-1.49),ARHGAP33(+2.31),ARRB1(+2.62),ASPN(+14.68),ATP1B1(-2.11),ATP8A1(+3.33),AXL(-1.57),BIRC5(+2.19),BMP1(+1.86),BMP4(+1.85),BMP5(+3.06),C4A/C4B(+2…
Embryonic Development,Nervous System Development and Function,Organ Development,Organ Morphology,Organismal Development,Tissue Development,Visual System Development and Function	Morphology of eye	7.54e-14			86	70	16	ADAM9(-1.69),ADCYAP1(+4.25),AGPAT3(+1.58),ALDH1A3(+3.21),AQP1(+2.14),ARSB(+1.72),ASCL1(+5.3),ATP1B2(-1.79),ATP8A2(+2.14),BMP4(+1.85),BMPR1B(-2.97),CACNA1F(-3.83),CBS/CBSL(+2.37),CDHR1(+2.89),CDK20(-1.81),CFH(+16.28),CLIC4(+1.64),CNGA3(+5.89),COL1A1(+3.04),COL2A1(+1.9),COL8A2(+5.86),CRX(+5.29),CYP1B1(+2.61),DIO3(+6.08),DLX2(+2.73),E2F1(+2.7),EGFLAM(+7.09),ELK3(+2.33),EMX2(-1.97),EPHB1(+2.81),FGF1(…
Cancer,Gastrointestinal Disease,Organismal Injury and Abnormalities	Esophageal cancer	8.09e-14			147	118	29	ABCA8(+3.17),ABCC4(-2.19),ABCC5(+1.68),ABCC9(+2.43),ADARB1(+1.73),AJAP1(+2.43),AKAP6(+1.88),ANGPT1(+5.6),ANO1(+5.01),APCDD1L(+2.38),ARHGAP28(+3.07),ARHGEF40(+1.86),ASTN2(+1.88),ATF5(+2.66),ATP6V1C2(+4.46),AXL(-1.57),BCHE(+2.65),BOC(+1.7),BRINP2(+3.07),BRINP3(+6.4),BRSK1(-1.69),CA10(+5.2),CACNA1E(+4.04),CCDC102B(-4.43),CD44(+3.93),CDH23(-1.49),CDKN1A(-2.32),CELSR2(-1.92),CENPF(+1.71),CHD5(+3.82),C…
Gene Expression	Transcription	1.02e-13	Increased	4.839	406	306	100	A2M(+4.05),ABLIM1(+1.7),ABLIM3(+3.62),ADCYAP1(+4.25),AFF2(+2.21),AFF3(+1.85),AGER(-1.91),AHR(+3.68),AIF1(-4.76),ANG(-3.03),ANK2(+2.8),ANKRD1(-2.65),APBA1(+2.1),APBA3(-1.67),ARF4(-2.49),ARRB1(+2.62),ARX(-5.71),ASCL1(+5.3),ASPM(+2.11),ATF5(+2.66),ATOH8(+2.32),ATP1B1(-2.11),ATRAID(-1.69),AUTS2(+3.63),BACH2(+1.83),BAMBI(+1.63),BARHL1(+2.44),BCL11A(+3.04),BCL11B(+4.28),BHLHE22(+5.15),BIRC5(+2.19),BLZF…
Developmental Disorder,Embryonic Development,Organismal Development,Tissue Morphology	Abnormal morphology of embryonic tissue	1.16e-13			137	113	24	ALDH1A3(+3.21),APEX1(+1.71),ARRB1(+2.62),ASCL1(+5.3),BCL11B(+4.28),BMP1(+1.86),BMP4(+1.85),BMPER(+5.67),BMPR2(+2.38),BRCA1(+1.77),BRSK1(-1.69),BRSK2(+2.27),CACNA1C(+3.21),CDC25A(+1.75),CDH1(+3.1),CDK20(-1.81),CDK5R1(+2.97),CDKN1A(-2.32),CDON(+1.56),CENPU(+2.42),COL2A1(+1.9),CTNNBIP1(+1.87),CTSV(+2.48),CXCR4(+2.78),CYP51A1(-1.69),DAB1(+2.05),DAB2(+1.76),DACT1(+2.82),DAD1(-1.61),DCX(+1.97),DISP1(+1…
Embryonic Development,Organismal Development,Skeletal and Muscular System Development and Function	Limb development	1.21e-13		1.004	71	52	19	AFF3(+1.85),BMP4(+1.85),BMPR1B(-2.97),BMPR2(+2.38),CACNA1C(+3.21),CHST11(+1.74),COL2A1(+1.9),CRABP2(-1.58),CYP27B1(-2.51),E2F1(+2.7),EBF1(+17.28),ETS1(+1.84),FGFR1(+1.86),FGFR3(-2.34),FOXO1(+2.33),GAS1(+3.38),GREM1(-1.83),IFT172(-1.52),INPP5D(-3.53),IRF6(+2.66),ITGA11(+5.36),KDR(+2.05),KREMEN1(+1.85),LEF1(+2.55),LMX1B(+7.02),LRP4(+1.89),MAP3K20(+1.86),MSX1(+6.43),MYCN(+3.19),NABP2(-1.89),NOS3(-5.…
Molecular Transport	Transport of molecule	1.51e-13	Increased	3.021	325	223	102	A2M(+4.05),ABCA12(+2.54),ABCC4(-2.19),ABCC5(+1.68),ABCC8(+4.12),ABCC9(+2.43),ACADL(+2.1),ACBD3(-1.69),ACSL3(-1.86),ADAM9(-1.69),ADCYAP1(+4.25),ADD2(+2.03),AGER(-1.91),ALK(+3.89),ALKBH5(-2.1),ALOX15(-2.39),ANG(-3.03),ANGPT1(+5.6),ANKH(+1.95),ANKRD1(-2.65),ANO1(+5.01),ANO2(+4.77),ANO4(+2.57),ANXA2(+1.65),AP3B2(+2.89),APBA1(+2.1),APPL2(+1.69),AQP1(+2.14),ARF1(-1.49),ARSB(+1.72),ATP10A(+2.87),ATP1A3(…
Organismal Development,Renal and Urological System Development and Function	Development of urinary tract	1.52e-13		1.249	80	55	25	AGER(-1.91),AHR(+3.68),ALDH1A3(+3.21),ANXA2(+1.65),AQP1(+2.14),ARSB(+1.72),ARX(-5.71),BICC1(+4.24),BMP4(+1.85),CD44(+3.93),CDKN1A(-2.32),CENPF(+1.71),CTNNBIP1(+1.87),CXCL14(+1.96),DACT2(+5.62),DCHS1(+1.75),EDNRA(+9.03),EHD4(-2.45),EMX2(-1.97),EPAS1(+2.73),ETV4(+2.16),FBLN1(+4.81),FBN1(+1.56),FGFR1(+1.86),FGFRL1(-1.69),FOXC1(+7.92),GCNT1(-2.78),GDF15(-5.46),GREM1(-1.83),GRID2(+6.81),GZF1(-1.7),HDA…
Cellular Movement	Cell movement of tumor cell lines	1.52e-13	Increased	4.338	220	178	42	A2M(+4.05),ABCC4(-2.19),ADAM12(+3.56),ADAM9(-1.69),ADAMTS5(+2.45),AFAP1(+2.7),AFAP1-AS1(+1.93),AGER(-1.91),AHR(+3.68),AIF1(-4.76),AJAP1(+2.43),ALCAM(+3.09),ANXA2(+1.65),ARF1(-1.49),ARRB1(+2.62),ASCL1(+5.3),AXL(-1.57),BMPR2(+2.38),BRCA1(+1.77),CALD1(+1.68),CAMKK2(+2.21),CAPN1(+1.7),CCL2(+2.16),CCN3(+4.98),CCN4(+3.55),CD44(+3.93),CDC25B(+2.16),CDH1(+3.1),CDK14(+2.15),CDKN1A(-2.32),CLDN1(+1.7),CLDN3…
Neurological Disease,Organismal Injury and Abnormalities,Psychological Disorders	Tauopathy	1.53e-13			143	99	44	A2M(+4.05),ADAM12(+3.56),ADGRD1(-2.98),AGER(-1.91),AKAP2(+2.04),ALOX15(-2.39),AQP1(+2.14),ATP1A3(+2.61),ATP1B1(-2.11),ATP8A1(+3.33),BCHE(+2.65),BRCA1(+1.77),C16orf71(-1.91),C4A/C4B(+2.69),CAMK2B(+3.05),CAPN1(+1.7),CBS/CBSL(+2.37),CCL2(+2.16),CCNB1(+1.58),CDC42EP3(+2.0),CDK5R1(+2.97),CHL1(+2.12),CHRM2(+1.92),CHRM3(+2.33),CHRNA3(+3.24),CHRNA5(+2.29),CHRNA7(+1.94),CHRNB2(+2.52),CNR1(+8.01),COL25A1(+…
Cardiovascular Disease	Hypertension	1.68e-13		-0.818	156	115	41	ABCC8(+4.12),ABCC9(+2.43),ABLIM1(+1.7),ACBD3(-1.69),ADD2(+2.03),AFF3(+1.85),AGER(-1.91),AHR(+3.68),ANGPT1(+5.6),ANGPTL2(+2.25),ANKRD29(+2.61),ASPN(+14.68),ATL3(+1.78),BIRC5(+2.19),BMP4(+1.85),BMPR1B(-2.97),BMPR2(+2.38),BOK(+2.12),BORA(-1.95),C3orf18(-2.06),CA4(-6.57),CACNA1B(-1.83),CACNA1C(+3.21),CACNA1F(-3.83),CACNA1G(+2.29),CACNA2D1(+3.79),CBLN1(+5.11),CBX7(-1.96),CCL2(+2.16),CELF4(+2.54),CFH(+…
Cellular Development,Cellular Growth and Proliferation,Nervous System Development and Function,Tissue Development	Growth of neurites	1.8e-13	Increased	6.313	119	96	23	A2M(+4.05),ADCYAP1(+4.25),AGER(-1.91),ALK(+3.89),ANGPT1(+5.6),APEX1(+1.71),ARHGAP33(+2.31),ARX(-5.71),BMP4(+1.85),BRSK1(-1.69),BRSK2(+2.27),BTG3(-2.04),CABLES1(+2.44),CAMK2B(+3.05),CCL2(+2.16),CDK5R1(+2.97),CDKN1A(-2.32),CHL1(+2.12),CHN1(-1.64),CNR1(+8.01),CNTN2(+4.37),CRMP1(+1.96),CXCR4(+2.78),DCLK1(+4.51),DCX(+1.97),DDR1(-1.74),DNAJA3(-1.56),DOCK1(+1.85),DOCK4(+2.36),DOK5(+2.15),DOK6(+1.99),DPY…
Respiratory System Development and Function	Morphology of respiratory system	1.86e-13			88	66	22	ABCA12(+2.54),ALDH1A3(+3.21),ANO1(+5.01),ARRB1(+2.62),ARSB(+1.72),ASCL1(+5.3),BMP4(+1.85),BMPER(+5.67),BMPR2(+2.38),CBS/CBSL(+2.37),CDK2AP1(+2.27),CDKN1A(-2.32),CDO1(-1.69),CDON(+1.56),CHL1(+2.12),COL2A1(+1.9),COL3A1(+8.18),CTNNBIP1(+1.87),DCHS1(+1.75),DDR2(+4.69),DENND1B(+1.65),DHCR7(-1.88),DNASE2(-1.68),DOCK1(+1.85),EGFR(+2.45),ELK3(+2.33),EMX2(-1.97),EPAS1(+2.73),EPOR(-2.66),FBLN1(+4.81),FBN1(…
Cardiovascular Disease,Hereditary Disorder,Organismal Injury and Abnormalities	Familial cardiovascular disease	2e-13	Decreased	-2.607	119	85	34	ABCC9(+2.43),ADCY8(+3.77),ANK2(+2.8),ANKRD1(-2.65),BMPR1B(-2.97),BMPR2(+2.38),CA4(-6.57),CACNA1C(+3.21),CACNA1E(+4.04),CACNA2D1(+3.79),CALM1 (includes others)(+1.49),CCDC151(-2.08),CFH(+16.28),CFI(+2.44),CHRM2(+1.92),COL1A1(+3.04),COL3A1(+8.18),COL5A1(+2.19),CPS1(-2.96),CRELD1(-2.41),DCHS1(+1.75),DCN(+24.15),DLC1(+2.74),DNAH11(+2.5),DRD4(-3.01),ECE2(-2.4),EDNRA(+9.03),EDNRB(-4.04),EMD(-1.58),ETS2…
Embryonic Development,Organismal Development	Morphogenesis of head	2.04e-13			72	61	11	ALDH1A3(+3.21),AQP1(+2.14),ATP8A2(+2.14),BHLHE22(+5.15),BMP4(+1.85),BMPR1B(-2.97),CBS/CBSL(+2.37),CDH23(-1.49),CDHR1(+2.89),CDK2AP1(+2.27),COL1A1(+3.04),COL2A1(+1.9),COL5A1(+2.19),COL8A2(+5.86),CRISPLD2(+7.46),DLC1(+2.74),EGFR(+2.45),EMX1(+3.76),EPHB1(+2.81),FGFR1(+1.86),FN1(+3.0),FRZB(+4.89),GAS1(+3.38),HSF4(-2.58),INSIG1(-2.21),INSIG2(-2.22),IRX3(+4.51),LEF1(+2.55),LIM2(-2.91),LMX1B(+7.02),MAB2…
Cancer,Dermatological Diseases and Conditions,Organismal Injury and Abnormalities	Skin squamous cell carcinoma	2.81e-13		1.719	174	153	21	ABCC9(+2.43),ADAM12(+3.56),ADAMTS10(+3.13),ADAMTSL3(+10.28),AFF3(+1.85),AKAP2(+2.04),AKAP6(+1.88),ANGPT1(+5.6),ANGPTL2(+2.25),ANKS1B(+2.02),ARAP2(+1.94),ARSB(+1.72),ATP10A(+2.87),AXL(-1.57),B3GALT5(+2.24),BACH2(+1.83),BRINP2(+3.07),BRINP3(+6.4),BSN(+2.15),CACNA1C(+3.21),CACNA1E(+4.04),CACNA2D4(+4.85),CADPS(+1.95),CCDC88B(-4.67),CD44(+3.93),CDH1(+3.1),CDH18(+2.06),CDH23(-1.49),CDH7(+2.09),CHL1(+2.…
Cancer,Dermatological Diseases and Conditions,Organismal Injury and Abnormalities	Non-melanoma skin cancer	3.23e-13		1.719	176	155	21	ABCC9(+2.43),ADAM12(+3.56),ADAMTS10(+3.13),ADAMTSL3(+10.28),AFF3(+1.85),AKAP2(+2.04),AKAP6(+1.88),ANGPT1(+5.6),ANGPTL2(+2.25),ANKS1B(+2.02),ARAP2(+1.94),ARSB(+1.72),ATP10A(+2.87),AXL(-1.57),B3GALT5(+2.24),BACH2(+1.83),BRINP2(+3.07),BRINP3(+6.4),BSN(+2.15),CACNA1C(+3.21),CACNA1E(+4.04),CACNA2D4(+4.85),CADPS(+1.95),CCDC88B(-4.67),CD44(+3.93),CDH1(+3.1),CDH18(+2.06),CDH23(-1.49),CDH7(+2.09),CHL1(+2.…
Cellular Development,Connective Tissue Development and Function,Tissue Development	Differentiation of osteoblastic-lineage cells	3.3e-13		1.763	72	58	14	AHR(+3.68),ATRAID(-1.69),AXIN2(+3.19),BMP3(+3.85),BMP4(+1.85),BMPER(+5.67),BMPR1B(-2.97),BMPR2(+2.38),CCN3(+4.98),CCN4(+3.55),CDK6(+2.2),CEBPD(+2.36),CTNNBIP1(+1.87),DDR2(+4.69),EDNRA(+9.03),EGFR(+2.45),EIF2AK2(+1.57),EPHA2(-1.74),ERBB3(+2.29),FBLIM1(+2.57),FGFR1(+1.86),FHL2(+2.13),FN1(+3.0),FOSL2(+1.73),FRZB(+4.89),GABBR1(+1.85),GREM1(-1.83),HEY1(+2.26),IFI16(+2.82),IFITM1(-1.87),IGFBP5(+2.03),I…
Connective Tissue Disorders,Hereditary Disorder,Organismal Injury and Abnormalities	Hereditary connective tissue disorder	3.55e-13		-1.854	138	106	32	ABCC9(+2.43),ACP5(-2.76),ADAMTS10(+3.13),ALDOC(-3.65),ANKH(+1.95),APC2(+1.78),ASPM(+2.11),ASPN(+14.68),BMP1(+1.86),BMP4(+1.85),BMPER(+5.67),BMPR1B(-2.97),BSCL2(-1.53),CCL2(+2.16),CDC45(+2.65),CDC6(+2.07),CDH1(+3.1),CDK6(+2.2),CDKN1C(-1.78),CDON(+1.56),COL17A1(+6.4),COL1A1(+3.04),COL27A1(+1.86),COL2A1(+1.9),COL3A1(+8.18),COL5A1(+2.19),COL6A2(+1.72),COL9A1(+1.52),COL9A2(+2.15),COL9A3(+4.01),CREB3L2…
Cancer,Hematological Disease,Organismal Injury and Abnormalities	Bone marrow neoplasm	3.6e-13		0.953	345	265	80	ABCA12(+2.54),ADAM12(+3.56),ADAMTS17(+4.3),ADAMTS5(+2.45),ADCY1(+3.35),ADCYAP1R1(+5.81),AFF3(+1.85),AKAP2(+2.04),ALK(+3.89),ALOX15(-2.39),ANGPT1(+5.6),ANGPTL2(+2.25),ANK2(+2.8),ANKRD26(-1.77),ANKS1B(+2.02),ANO2(+4.77),ANO4(+2.57),ANXA2(+1.65),APCDD1(+15.97),APEX1(+1.71),ARHGAP31(+4.04),ATL1(+2.14),ATP1B1(-2.11),ATP8A2(+2.14),AXIN2(+3.19),AXL(-1.57),B4GALNT1(+3.19),BACH2(+1.83),BBC3(-1.77),BCL11B(…
Embryonic Development,Organ Development,Organismal Development,Renal and Urological System Development and Function,Tissue Development	Formation of kidney	3.81e-13		1.249	78	53	25	AGER(-1.91),AHR(+3.68),ALDH1A3(+3.21),ANXA2(+1.65),AQP1(+2.14),ARSB(+1.72),ARX(-5.71),BICC1(+4.24),BMP4(+1.85),CD44(+3.93),CDKN1A(-2.32),CENPF(+1.71),CTNNBIP1(+1.87),CXCL14(+1.96),DACT2(+5.62),DCHS1(+1.75),EDNRA(+9.03),EHD4(-2.45),EMX2(-1.97),EPAS1(+2.73),ETV4(+2.16),FBLN1(+4.81),FBN1(+1.56),FGFR1(+1.86),FGFRL1(-1.69),FOXC1(+7.92),GCNT1(-2.78),GDF15(-5.46),GREM1(-1.83),GRID2(+6.81),GZF1(-1.7),HDA…
Endocrine System Disorders,Gastrointestinal Disease,Metabolic Disease,Organismal Injury and Abnormalities	Diabetic complication	3.87e-13			72	55	17	AIF1(-4.76),AQP1(+2.14),ARL1(-1.97),BMP4(+1.85),CA4(-6.57),CACNA1B(-1.83),CACNA1C(+3.21),CACNA1F(-3.83),CACNA2D1(+3.79),CACNA2D3(+5.28),CACNA2D4(+4.85),CDKN1A(-2.32),CHRM2(+1.92),CHRM3(+2.33),CNR1(+8.01),COL13A1(+2.88),COL14A1(+4.09),COL15A1(+2.47),COL16A1(+5.19),COL17A1(+6.4),COL1A1(+3.04),COL21A1(+5.93),COL23A1(+2.5),COL25A1(+3.53),COL27A1(+1.86),COL2A1(+1.9),COL3A1(+8.18),COL5A1(+2.19),COL6A2(…
Cell Cycle	Interphase	3.95e-13		1.944	170	135	35	ADCYAP1(+4.25),ADCYAP1R1(+5.81),AFAP1-AS1(+1.93),AHR(+3.68),ALOX15(-2.39),ANGPT1(+5.6),ANXA2(+1.65),ARRB1(+2.62),ATF5(+2.66),AXL(-1.57),BIRC5(+2.19),BLID(+4.56),BMP4(+1.85),BORA(-1.95),BRCA1(+1.77),BRSK1(-1.69),BRSK2(+2.27),BTRC(+1.67),BUB1B(+1.96),CABLES1(+2.44),CAMK2B(+3.05),CAMKK2(+2.21),CCNA2(+1.74),CCNB1(+1.58),CD44(+3.93),CDC25A(+1.75),CDC25B(+2.16),CDC25C(+1.99),CDC45(+2.65),CDC6(+2.07),CD…
Developmental Disorder	Dysgenesis	5.49e-13	Decreased	-5.097	139	102	37	ABCC4(-2.19),AHR(+3.68),ALDH1A3(+3.21),ALK(+3.89),ARRB1(+2.62),ARX(-5.71),AXL(-1.57),BACH2(+1.83),BCL11A(+3.04),BCL11B(+4.28),BHLHE22(+5.15),BMF(+1.59),BMP4(+1.85),BMPER(+5.67),BTRC(+1.67),CDC45(+2.65),CDC6(+2.07),CDK6(+2.2),CDKN1C(-1.78),CEP290(-1.67),CLPP(-1.95),COL2A1(+1.9),CPAMD8(+1.7),CTNNBIP1(+1.87),CYP1B1(+2.61),CYP27B1(-2.51),CYP51A1(-1.69),DACT1(+2.82),DCLK1(+4.51),DNASE2(-1.68),E2F1(+2.…
Digestive System Development and Function	Morphology of digestive system	5.56e-13			164	114	50	ABCA12(+2.54),ABCC4(-2.19),ADIPOR1(-1.58),AHR(+3.68),ANKH(+1.95),APEX1(+1.71),ARFGEF3(-1.73),ARX(-5.71),ASCL1(+5.3),AXIN2(+3.19),BCL11B(+4.28),BMP1(+1.86),BMP4(+1.85),BRCA1(+1.77),BSCL2(-1.53),C4A/C4B(+2.69),CADPS(+1.95),CBS/CBSL(+2.37),CCDC3(+6.75),CDKN1A(-2.32),CDON(+1.56),CHRNA3(+3.24),CISH(+2.15),COL3A1(+8.18),CREB3L2(+1.81),CTNNBIP1(+1.87),CTSV(+2.48),CXCL14(+1.96),CYP1A1(+5.71),CYP2E1(-2.25…
Cell-To-Cell Signaling and Interaction,Cellular Assembly and Organization	Cell-cell contact	5.75e-13	Increased	3.134	150	121	29	ADAM12(+3.56),ADAM9(-1.69),ADD2(+2.03),ADGRB1(+2.1),ALCAM(+3.09),ALOX15(-2.39),AMIGO2(+3.9),ANGPT1(+5.6),BOC(+1.7),BSN(+2.15),CACNA1F(-3.83),CACNA2D1(+3.79),CBLN1(+5.11),CCL2(+2.16),CD44(+3.93),CDH1(+3.1),CDK5R1(+2.97),CDON(+1.56),CERCAM(+2.45),CHGA(+14.1),CHRNA7(+1.94),CHRNB2(+2.52),CLDN1(+1.7),CLDN19(+2.25),CLDN3(-2.47),CNTN1(+3.34),CNTN4(+3.64),COL13A1(+2.88),CTSV(+2.48),CUX2(+1.74),CXCR4(+2.7…
Neurological Disease,Organismal Injury and Abnormalities,Psychological Disorders	Dementia	5.8e-13			147	98	49	A2M(+4.05),ADAM12(+3.56),ADGRD1(-2.98),AGER(-1.91),AKAP2(+2.04),ALOX15(-2.39),AQP1(+2.14),ATP1A3(+2.61),ATP1B1(-2.11),ATP8A1(+3.33),BCHE(+2.65),BRCA1(+1.77),C16orf71(-1.91),C4A/C4B(+2.69),C9orf72(-2.4),CA4(-6.57),CACNA1B(-1.83),CACNA1C(+3.21),CACNA1F(-3.83),CACNA2D1(+3.79),CACNA2D3(+5.28),CACNA2D4(+4.85),CAMK2B(+3.05),CAPN1(+1.7),CBS/CBSL(+2.37),CCL2(+2.16),CCNB1(+1.58),CDC42EP3(+2.0),CDK5R1(+2.9…
Digestive System Development and Function,Organismal Development	Morphology of mouth	5.81e-13			48	40	8	ABCA12(+2.54),ANKH(+1.95),AXIN2(+3.19),BCL11B(+4.28),BMP4(+1.85),CDKN1A(-2.32),CDON(+1.56),CREB3L2(+1.81),CTSV(+2.48),CYP51A1(-1.69),DCN(+24.15),E2F1(+2.7),EDNRA(+9.03),EGFR(+2.45),FGFR1(+1.86),FGFR3(-2.34),FOXF2(+7.89),GAS1(+3.38),H19(+1.99),INHBA(+3.11),INHBB(+5.09),ITGA11(+5.36),KRT10(-1.65),LEF1(+2.55),LRP4(+1.89),LTBP3(+2.15),MSX1(+6.43),NDST1(+1.6),NFIB(+3.99),PRRX1(+8.65),PTH1R(+1.87),RRM2…
Digestive System Development and Function	Development of gastrointestinal tract	6.02e-13		1.394	77	63	14	ASPN(+14.68),ATP1B1(-2.11),AXIN2(+3.19),BCL11B(+4.28),BMP4(+1.85),BMP5(+3.06),BNC2(+3.43),CDON(+1.56),COL1A1(+3.04),COL2A1(+1.9),COL3A1(+8.18),DCHS1(+1.75),DCN(+24.15),DLX2(+2.73),EDAR(+2.88),EDARADD(+3.77),EDNRB(-4.04),EGFR(+2.45),ERBB3(+2.29),FGFR1(+1.86),FGFR3(-2.34),FN1(+3.0),FOXC1(+7.92),FOXF2(+7.89),FOXM1(+2.16),FZD1(+1.9),GABRA3(+2.43),GABRB3(+4.19),GABRE(+2.41),GABRP(+8.82),GAS1(+3.38),GR…
Cardiovascular Disease	Disorder of blood pressure	6.84e-13		-1.28	159	117	42	ABCC8(+4.12),ABCC9(+2.43),ABLIM1(+1.7),ACBD3(-1.69),ADD2(+2.03),AFF3(+1.85),AGER(-1.91),AHR(+3.68),ANGPT1(+5.6),ANGPTL2(+2.25),ANKRD29(+2.61),ASPN(+14.68),ATL3(+1.78),BIRC5(+2.19),BMP4(+1.85),BMPR1B(-2.97),BMPR2(+2.38),BOK(+2.12),BORA(-1.95),C3orf18(-2.06),CA4(-6.57),CACNA1B(-1.83),CACNA1C(+3.21),CACNA1F(-3.83),CACNA1G(+2.29),CACNA2D1(+3.79),CBLN1(+5.11),CBX7(-1.96),CCL2(+2.16),CELF4(+2.54),CFH(+…
Psychological Disorders	Hyperactive behavior	7.08e-13	Decreased	-3.656	50	39	11	ACOT13(-1.8),ADCY1(+3.35),ADCYAP1(+4.25),ADCYAP1R1(+5.81),AP3B2(+2.89),ATP1A3(+2.61),BRINP1(+3.57),CACNA1B(-1.83),CACNA1G(+2.29),CCDC141(+4.04),CDK5R1(+2.97),CHRNA7(+1.94),CHRNB2(+2.52),CNR1(+8.01),DDR1(-1.74),FEZF2(-3.35),FGFR1(+1.86),FOS(+2.02),GABBR1(+1.85),GABBR2(+3.43),GABRA3(+2.43),GABRB3(+4.19),GNAO1(+2.29),GRIA1(+1.96),GRIA2(+6.74),GRIA4(+2.25),GRM2(+4.8),KALRN(+2.8),KCNC1(+3.12),KCNQ2(+2…
Cancer,Gastrointestinal Disease,Organismal Injury and Abnormalities	Esophageal carcinoma	7.38e-13			138	113	25	ABCA8(+3.17),ABCC4(-2.19),ABCC5(+1.68),ABCC9(+2.43),ADARB1(+1.73),AJAP1(+2.43),AKAP6(+1.88),ANO1(+5.01),APCDD1L(+2.38),ARHGAP28(+3.07),ARHGEF40(+1.86),ASTN2(+1.88),ATF5(+2.66),ATP6V1C2(+4.46),AXL(-1.57),BCHE(+2.65),BOC(+1.7),BRINP2(+3.07),BRINP3(+6.4),BRSK1(-1.69),CA10(+5.2),CACNA1E(+4.04),CCDC102B(-4.43),CD44(+3.93),CDH23(-1.49),CELSR2(-1.92),CENPF(+1.71),CHD5(+3.82),CHRNA7(+1.94),CHST11(+1.74),…
Cancer,Organismal Injury and Abnormalities,Respiratory Disease	Laryngeal squamous cell carcinoma	7.68e-13			120	102	18	ABCA12(+2.54),ABCC9(+2.43),ABLIM3(+3.62),ACSL3(-1.86),ADAM9(-1.69),ADAMTS14(+3.43),ADAMTS20(+2.39),ADARB1(+1.73),ADCY1(+3.35),ARHGAP28(+3.07),ARHGAP31(+4.04),ASAP2(+1.65),ATP1A3(+2.61),BICC1(+4.24),BRINP2(+3.07),CACNA1B(-1.83),CCDC141(+4.04),CD44(+3.93),CDCA7(+3.62),CDH18(+2.06),CENPF(+1.71),CNTN1(+3.34),CNTN4(+3.64),CNTNAP4(+2.49),CNTNAP5(+13.56),COBLL1(+1.75),COL15A1(+2.47),COL5A1(+2.19),CSMD3(…
Cellular Growth and Proliferation	Outgrowth of cells	9.66e-13	Increased	4.767	109	86	23	A2M(+4.05),ADCYAP1(+4.25),AGER(-1.91),ALK(+3.89),ANGPT1(+5.6),APEX1(+1.71),ARHGAP33(+2.31),ARX(-5.71),BMP4(+1.85),BRSK1(-1.69),BRSK2(+2.27),BTG3(-2.04),CABLES1(+2.44),CAMK2B(+3.05),CCL2(+2.16),CDK5R1(+2.97),CDKN1A(-2.32),CEBPD(+2.36),CHL1(+2.12),CHN1(-1.64),CNR1(+8.01),COL1A1(+3.04),CXCL14(+1.96),DCX(+1.97),DDR1(-1.74),DNAJA3(-1.56),DOCK1(+1.85),DOCK4(+2.36),DOK5(+2.15),DOK6(+1.99),DPYSL3(+1.96),…
Cellular Growth and Proliferation	Colony formation of tumor cell lines	1.04e-12		1.298	88	74	14	AFAP1-AS1(+1.93),AHR(+3.68),ALK(+3.89),ANKRD1(-2.65),BACH2(+1.83),BBC3(-1.77),BIRC5(+2.19),BRCA1(+1.77),CABLES1(+2.44),CAPN1(+1.7),CCL2(+2.16),CD44(+3.93),CDKN1A(-2.32),CRNDE(+3.25),CTNNBIP1(+1.87),DIABLO(-1.53),DLC1(+2.74),DNAJA3(-1.56),E2F1(+2.7),E2F3(+1.56),EGFR(+2.45),EPAS1(+2.73),EPB41L3(+1.91),EPHA2(-1.74),ERBB3(+2.29),ETS1(+1.84),FBLN1(+4.81),FGFR1(+1.86),FGFR3(-2.34),FOS(+2.02),FRMD6(+1.7…
Cancer,Hematological Disease,Immunological Disease,Organismal Injury and Abnormalities	Leukemia	1.15e-12		-0.383	388	298	90	ADAM12(+3.56),ADAMTS5(+2.45),ADARB2(+3.39),ADCY1(+3.35),ADCY3(+1.72),ADCYAP1R1(+5.81),ADD2(+2.03),ADGRB1(+2.1),AFF3(+1.85),AKAP2(+2.04),ALK(+3.89),ALOX15(-2.39),ANGPT1(+5.6),ANGPTL2(+2.25),ANK2(+2.8),ANKH(+1.95),ANKRD26(-1.77),ANKS1B(+2.02),ANO2(+4.77),ANO4(+2.57),ANXA2(+1.65),APCDD1(+15.97),APEX1(+1.71),ARHGAP31(+4.04),ARHGAP33(+2.31),ATL1(+2.14),ATP1B1(-2.11),ATP8A2(+2.14),ATRNL1(+1.51),AXIN2(+…
Cell Cycle	G1 phase	1.22e-12		1.16	110	88	22	ADCYAP1(+4.25),AFAP1-AS1(+1.93),AHR(+3.68),ALOX15(-2.39),ANXA2(+1.65),ARRB1(+2.62),AXL(-1.57),BIRC5(+2.19),BRCA1(+1.77),BTRC(+1.67),CABLES1(+2.44),CAMK2B(+3.05),CAMKK2(+2.21),CCNA2(+1.74),CDC25A(+1.75),CDC25B(+2.16),CDC25C(+1.99),CDC45(+2.65),CDC6(+2.07),CDCA2(+1.8),CDH1(+3.1),CDK5RAP3(-1.65),CDK6(+2.2),CDKN1A(-2.32),CDKN1C(-1.78),CEBPD(+2.36),CRNDE(+3.25),CYP1B1(+2.61),DAB2(+1.76),DCN(+24.15),DD…
Cell Death and Survival	Cell survival	1.23e-12	Increased	4.304	299	213	86	ADCY1(+3.35),ADCYAP1(+4.25),ADCYAP1R1(+5.81),ADIPOR1(-1.58),AGER(-1.91),AHR(+3.68),AK5(+2.51),ALCAM(+3.09),ALK(+3.89),AMIGO2(+3.9),ANG(-3.03),ANGPT1(+5.6),ANKRD1(-2.65),ANKS1B(+2.02),APEX1(+1.71),APLF(-2.7),APPL2(+1.69),ARRB1(+2.62),ASS1(+2.45),ATF5(+2.66),AURKAIP1(-1.75),AXL(-1.57),BAMBI(+1.63),BBC3(-1.77),BCL11B(+4.28),BIRC5(+2.19),BMP4(+1.85),BMP5(+3.06),BNIP3(-1.92),BRCA1(+1.77),BRIP1(+2.46),…
Connective Tissue Development and Function,Tissue Morphology	Quantity of connective tissue	1.31e-12		1.892	140	91	49	ACADL(+2.1),ACOT13(-1.8),ADAM12(+3.56),ADCYAP1(+4.25),ADD2(+2.03),AHR(+3.68),ALOX15(-2.39),ANGPTL2(+2.25),AQP1(+2.14),ARF1(-1.49),B4GALNT1(+3.19),BIRC5(+2.19),BMP4(+1.85),BRCA1(+1.77),BSCL2(-1.53),CAMKK2(+2.21),CAPN1(+1.7),CCDC3(+6.75),CCDC80(+1.98),CCL2(+2.16),CD44(+3.93),CDK6(+2.2),CDKN1A(-2.32),CEBPD(+2.36),CHRNA7(+1.94),CNR1(+8.01),COL1A1(+3.04),COL2A1(+1.9),CREB3L2(+1.81),CRTC3(+1.63),CTSV(+…
Auditory and Vestibular System Development and Function,Embryonic Development,Organ Development,Organismal Development,Tissue Development	Development of ear	1.33e-12		0.557	54	41	13	ALDH1A3(+3.21),ATP8A2(+2.14),BMP4(+1.85),BMP5(+3.06),BMPER(+5.67),CDH23(-1.49),CEBPD(+2.36),COL2A1(+1.9),CXCL14(+1.96),DDR1(-1.74),DLL1(-2.54),FGFR1(+1.86),FGFR3(-2.34),FRZB(+4.89),GAS1(+3.38),HES5(-2.3),HEY1(+2.26),HLA-DMA(-2.78),IFI16(+2.82),INSIG1(-2.21),INSIG2(-2.22),KLF2(+3.29),LGR5(-3.4),MAFB(+3.39),MSX1(+6.43),MYCN(+3.19),MYO15A(-2.44),MYO3A(+1.99),NOTCH1(-1.48),NR2F1(-5.84),NTF3(+3.71),NT…
Cancer,Hematological Disease,Organismal Injury and Abnormalities	Myeloid neoplasm	1.34e-12		0.404	344	264	80	ABCA12(+2.54),ADAM12(+3.56),ADAMTS17(+4.3),ADAMTS5(+2.45),ADCY1(+3.35),ADCYAP1R1(+5.81),AFF3(+1.85),AKAP2(+2.04),ALK(+3.89),ALOX15(-2.39),ANGPT1(+5.6),ANGPTL2(+2.25),ANK2(+2.8),ANKRD26(-1.77),ANKS1B(+2.02),ANO2(+4.77),ANO4(+2.57),ANXA2(+1.65),APCDD1(+15.97),APEX1(+1.71),ARHGAP31(+4.04),ATL1(+2.14),ATP1B1(-2.11),ATP8A2(+2.14),AXIN2(+3.19),AXL(-1.57),B4GALNT1(+3.19),BACH2(+1.83),BBC3(-1.77),BCL11B(…
Cancer,Organismal Injury and Abnormalities,Respiratory Disease	Upper airway cancer	1.36e-12			179	153	26	ABCA12(+2.54),ABCC5(+1.68),ABCC9(+2.43),ABLIM3(+3.62),ACSL3(-1.86),ADAM9(-1.69),ADAMTS14(+3.43),ADAMTS20(+2.39),ADAMTSL3(+10.28),ADARB1(+1.73),ADCY1(+3.35),AFAP1-AS1(+1.93),AKAP6(+1.88),ANKRD50(+1.66),ARFGEF3(-1.73),ARHGAP28(+3.07),ARHGAP31(+4.04),ASAP2(+1.65),ASCL1(+5.3),ATP1A3(+2.61),BICC1(+4.24),BRINP2(+3.07),BUB1B(+1.96),C12orf4(+1.85),C1orf61(+7.51),CACNA1B(-1.83),CACNA2D1(+3.79),CCDC141(+4.…
Cardiovascular Disease,Organismal Injury and Abnormalities	Arteriosclerosis	1.37e-12		0.545	111	78	33	ADARB2(+3.39),AGER(-1.91),AHR(+3.68),ALOX15(-2.39),ANKRD29(+2.61),ASTN2(+1.88),BIRC5(+2.19),BMPR1B(-2.97),CA4(-6.57),CACNA1C(+3.21),CACNA1E(+4.04),CACNA2D1(+3.79),CBS/CBSL(+2.37),CCL2(+2.16),CD44(+3.93),CDKN1A(-2.32),CNR1(+8.01),CNTNAP5(+13.56),COL2A1(+1.9),CORO2A(+2.44),CSMD1(+6.16),CSMD2(+3.8),CTSV(+2.48),DDR1(-1.74),DHFR(+1.79),DISP1(+1.61),DOCK4(+2.36),DOCK9(+1.6),ENTPD1(-1.58),F5(+4.74),FABP…
Cancer,Organismal Injury and Abnormalities	Mixed cell carcinoma	1.49e-12			194	149	45	ABCA12(+2.54),ABCC4(-2.19),ACP5(-2.76),ADAMTS10(+3.13),ADAMTS20(+2.39),ADCY2(-1.72),ADCYAP1R1(+5.81),ADD2(+2.03),AFF3(+1.85),AIF1(-4.76),AKAP6(+1.88),ALK(+3.89),AMOTL1(+1.8),ANKRD24(-3.32),AOPEP(+1.65),ARHGEF40(+1.86),ASPM(+2.11),ATP8A1(+3.33),AXIN2(+3.19),BRCA1(+1.77),BRINP3(+6.4),C1orf61(+7.51),CACNA1B(-1.83),CACNA1E(+4.04),CACNA2D1(+3.79),CACNA2D3(+5.28),CADPS(+1.95),CCN4(+3.55),CD109(+2.35),C…
Embryonic Development,Nervous System Development and Function,Ophthalmic Disease,Organ Development,Organ Morphology,Organismal Development,Organismal Injury and Abnormalities,Tissue Development,Visual System Development and Function	Abnormal morphology of eye	1.52e-12			74	59	15	ADAM9(-1.69),ADCYAP1(+4.25),ALDH1A3(+3.21),ARSB(+1.72),ASCL1(+5.3),ATP1B2(-1.79),ATP8A2(+2.14),BMP4(+1.85),BMPR1B(-2.97),CACNA1F(-3.83),CBS/CBSL(+2.37),CDHR1(+2.89),CDK20(-1.81),CFH(+16.28),CNGA3(+5.89),COL2A1(+1.9),COL8A2(+5.86),CRX(+5.29),CYP1B1(+2.61),DIO3(+6.08),DLX2(+2.73),E2F1(+2.7),EGFLAM(+7.09),ELK3(+2.33),EMX2(-1.97),EPHB1(+2.81),FOS(+2.02),FOXC1(+7.92),GALNS(+1.72),GAS1(+3.38),GUCA1A(-2…
Neurological Disease,Organismal Injury and Abnormalities,Psychological Disorders	Disorder of basal ganglia	1.68e-12			169	117	52	A2M(+4.05),ACTN3(-4.12),ADCY2(-1.72),ADGRD1(-2.98),ANXA2(+1.65),AQP1(+2.14),ASCL1(+5.3),ATP1A3(+2.61),ATP1B1(-2.11),B4GALNT1(+3.19),BCHE(+2.65),BCL11B(+4.28),C4A/C4B(+2.69),CACNA1B(-1.83),CACNA1C(+3.21),CACNA1F(-3.83),CACNA2D3(+5.28),CAMK2B(+3.05),CAMKK2(+2.21),CD44(+3.93),CDK5R1(+2.97),CDKN1C(-1.78),CHGA(+14.1),CHGB(+5.21),CHN1(-1.64),CHRM2(+1.92),CHRM3(+2.33),CHRNA7(+1.94),CHRNB2(+2.52),CNR1(+8…
Cellular Development,Connective Tissue Development and Function,Skeletal and Muscular System Development and Function,Tissue Development	Differentiation of osteoblasts	1.82e-12		1.829	70	56	14	AHR(+3.68),ATRAID(-1.69),AXIN2(+3.19),BMP3(+3.85),BMP4(+1.85),BMPER(+5.67),BMPR1B(-2.97),BMPR2(+2.38),CCN3(+4.98),CDK6(+2.2),CEBPD(+2.36),CTNNBIP1(+1.87),DDR2(+4.69),EDNRA(+9.03),EGFR(+2.45),EIF2AK2(+1.57),EPHA2(-1.74),ERBB3(+2.29),FBLIM1(+2.57),FGFR1(+1.86),FHL2(+2.13),FN1(+3.0),FOSL2(+1.73),FRZB(+4.89),GABBR1(+1.85),GREM1(-1.83),HEY1(+2.26),IFI16(+2.82),IFITM1(-1.87),IGFBP5(+2.03),INHBA(+3.11),…
Gene Expression	Transcription of RNA	2e-12	Increased	4.656	348	269	79	A2M(+4.05),ABLIM1(+1.7),ABLIM3(+3.62),ADCYAP1(+4.25),AFF3(+1.85),AGER(-1.91),AHR(+3.68),ANG(-3.03),ANKRD1(-2.65),ARF4(-2.49),ARRB1(+2.62),ARX(-5.71),ASCL1(+5.3),ASPM(+2.11),ATF5(+2.66),ATOH8(+2.32),AUTS2(+3.63),BACH2(+1.83),BAMBI(+1.63),BARHL1(+2.44),BCL11A(+3.04),BCL11B(+4.28),BHLHE22(+5.15),BIRC5(+2.19),BLZF1(-2.08),BMP3(+3.85),BMP4(+1.85),BMP5(+3.06),BMPR1B(-2.97),BMPR2(+2.38),BRCA1(+1.77),BRF…
Nervous System Development and Function,Organ Morphology,Organismal Development	Morphology of cerebral cortex	2.11e-12			68	49	19	ADCY1(+3.35),ARX(-5.71),ASPM(+2.11),AXL(-1.57),BMPR1B(-2.97),BRINP1(+3.57),BRSK1(-1.69),BRSK2(+2.27),CDK5R1(+2.97),CDON(+1.56),CHL1(+2.12),CHRNA7(+1.94),CHRNB2(+2.52),CRMP1(+1.96),CTSV(+2.48),CUX2(+1.74),CXCR4(+2.78),DAB1(+2.05),DCX(+1.97),DPYSL3(+1.96),EGFR(+2.45),EMX1(+3.76),EMX2(-1.97),ERBB3(+2.29),ESCO2(+2.34),FEZF1(-11.57),FEZF2(-3.35),FGF1(+2.78),FGFR1(+1.86),GAP43(+4.63),GM2A(-1.66),GRIA2(…
Skeletal and Muscular Disorders	Abnormality of limb	2.5e-12		-0.328	86	56	30	ALOX15(-2.39),ARSB(+1.72),ATL1(+2.14),BMP4(+1.85),BMPER(+5.67),BMPR1B(-2.97),BUB1B(+1.96),CBS/CBSL(+2.37),CCN3(+4.98),CDK20(-1.81),CDO1(-1.69),CHPF(-1.59),COL27A1(+1.86),COL2A1(+1.9),COL9A1(+1.52),CREB3L2(+1.81),CYP51A1(-1.69),EDAR(+2.88),EDARADD(+3.77),EIF2AK3(-2.83),EMD(-1.58),FDFT1(-2.01),FDPS(-1.71),FGFR3(-2.34),FN1(+3.0),FOS(+2.02),FRZB(+4.89),GAS1(+3.38),GDAP1(+2.62),HDAC6(-1.75),HELLS(+1.9…
Cellular Development,Cellular Growth and Proliferation,Nervous System Development and Function,Tissue Development	Outgrowth of neurites	2.66e-12	Increased	5.056	100	79	21	A2M(+4.05),ADCYAP1(+4.25),AGER(-1.91),ALK(+3.89),ANGPT1(+5.6),APEX1(+1.71),ARHGAP33(+2.31),ARX(-5.71),BMP4(+1.85),BRSK1(-1.69),BRSK2(+2.27),BTG3(-2.04),CABLES1(+2.44),CAMK2B(+3.05),CCL2(+2.16),CDK5R1(+2.97),CDKN1A(-2.32),CHL1(+2.12),CHN1(-1.64),CNR1(+8.01),DCX(+1.97),DDR1(-1.74),DNAJA3(-1.56),DOCK1(+1.85),DOCK4(+2.36),DOK5(+2.15),DOK6(+1.99),DPYSL3(+1.96),E2F1(+2.7),EGFR(+2.45),ELAVL4(+5.59),EPHA…
Cancer,Hematological Disease,Organismal Injury and Abnormalities	Bone marrow cancer	2.71e-12		0.689	334	256	78	ABCA12(+2.54),ADAM12(+3.56),ADAMTS17(+4.3),ADAMTS5(+2.45),ADCY1(+3.35),ADCYAP1R1(+5.81),AFF3(+1.85),AKAP2(+2.04),ALK(+3.89),ALOX15(-2.39),ANGPT1(+5.6),ANGPTL2(+2.25),ANK2(+2.8),ANKRD26(-1.77),ANKS1B(+2.02),ANO2(+4.77),ANO4(+2.57),ANXA2(+1.65),APCDD1(+15.97),APEX1(+1.71),ARHGAP31(+4.04),ATL1(+2.14),ATP1B1(-2.11),ATP8A2(+2.14),AXIN2(+3.19),AXL(-1.57),B4GALNT1(+3.19),BACH2(+1.83),BBC3(-1.77),BCL11B(…
Cellular Movement	Invasion of tumor cell lines	2.88e-12	Increased	3.469	176	145	31	A2M(+4.05),ABLIM1(+1.7),ADAM12(+3.56),ADAM9(-1.69),AFAP1-AS1(+1.93),AGER(-1.91),AHR(+3.68),AJAP1(+2.43),ALCAM(+3.09),APEX1(+1.71),AXL(-1.57),BIRC5(+2.19),BMP4(+1.85),BMPR2(+2.38),BRCA1(+1.77),CCL2(+2.16),CCN3(+4.98),CCN4(+3.55),CCNA2(+1.74),CD44(+3.93),CDC25B(+2.16),CDH1(+3.1),CDK14(+2.15),CDK5R1(+2.97),CDK5RAP3(-1.65),CDKN1A(-2.32),CFH(+16.28),CIB1(-2.02),CLDN3(-2.47),CMTM5(-2.58),CNR1(+8.01),CO…
Cardiovascular Disease,Organismal Injury and Abnormalities	Atherosclerosis	3.1e-12		0.861	109	76	33	ADARB2(+3.39),AGER(-1.91),AHR(+3.68),ALOX15(-2.39),ANKRD29(+2.61),ASTN2(+1.88),BIRC5(+2.19),BMPR1B(-2.97),CA4(-6.57),CACNA1C(+3.21),CACNA1E(+4.04),CACNA2D1(+3.79),CBS/CBSL(+2.37),CCL2(+2.16),CD44(+3.93),CDKN1A(-2.32),CNR1(+8.01),CNTNAP5(+13.56),CORO2A(+2.44),CSMD1(+6.16),CSMD2(+3.8),CTSV(+2.48),DDR1(-1.74),DHFR(+1.79),DISP1(+1.61),DOCK4(+2.36),DOCK9(+1.6),ENTPD1(-1.58),F5(+4.74),FABP5(+2.52),FADS…
Cellular Movement	Migration of tumor cell lines	3.15e-12	Increased	3.921	186	153	33	A2M(+4.05),ABCC4(-2.19),ADAM12(+3.56),ADAM9(-1.69),AFAP1(+2.7),AFAP1-AS1(+1.93),AGER(-1.91),AHR(+3.68),AIF1(-4.76),ALCAM(+3.09),ANXA2(+1.65),ARF1(-1.49),ARRB1(+2.62),ASCL1(+5.3),AXL(-1.57),BMPR2(+2.38),BRCA1(+1.77),CALD1(+1.68),CAMKK2(+2.21),CCL2(+2.16),CCN3(+4.98),CCN4(+3.55),CD44(+3.93),CDC25B(+2.16),CDH1(+3.1),CDKN1A(-2.32),CMTM5(-2.58),CRMP1(+1.96),CRNDE(+3.25),CTDSP1(+2.19),CTNNAL1(+1.6),CUL…
Cancer,Organismal Injury and Abnormalities	Clear cell neoplasm	3.15e-12			181	133	48	ADCY2(-1.72),AGER(-1.91),ANK2(+2.8),ARAP2(+1.94),ARFGEF3(-1.73),ARX(-5.71),ASPM(+2.11),AXIN2(+3.19),AXL(-1.57),BRCA1(+1.77),BSCL2(-1.53),BTRC(+1.67),BUB1B(+1.96),C3orf52(+2.26),C6orf62(-1.69),CBX7(-1.96),CCL2(+2.16),CD44(+3.93),CDC42EP3(+2.0),CDC6(+2.07),CDH1(+3.1),CDH23(-1.49),CDKN1A(-2.32),CENPF(+1.71),CENPU(+2.42),CLDN3(-2.47),CNTN2(+4.37),COL9A1(+1.52),CSMD1(+6.16),CSMD3(+3.28),CUL7(-1.62),DA…
Cancer,Endocrine System Disorders,Organismal Injury and Abnormalities	Extrapancreatic neuroendocrine tumor	3.34e-12		0.762	150	121	29	A2M(+4.05),ABCC9(+2.43),ADCY2(-1.72),AFF3(+1.85),AKAP6(+1.88),ALDOC(-3.65),ANKH(+1.95),ANXA2(+1.65),ASPM(+2.11),ASS1(+2.45),ATP10A(+2.87),AXL(-1.57),BNC2(+3.43),BRINP3(+6.4),CABLES1(+2.44),CACNA1C(+3.21),CAMK2B(+3.05),CD44(+3.93),CDC25B(+2.16),CDH1(+3.1),CDH23(-1.49),CDKN1A(-2.32),CEBPD(+2.36),CFH(+16.28),CHGA(+14.1),CHL1(+2.12),CHRM3(+2.33),COL25A1(+3.53),CSMD2(+3.8),CSMD3(+3.28),CXCR4(+2.78),DC…
Cancer,Endocrine System Disorders,Organismal Injury and Abnormalities	Neuroendocrine tumor	3.43e-12		0.893	157	126	31	A2M(+4.05),ABCC9(+2.43),ADCY2(-1.72),AFF3(+1.85),AKAP6(+1.88),ALDOC(-3.65),ANKH(+1.95),ANXA2(+1.65),ASPM(+2.11),ASS1(+2.45),ATP10A(+2.87),AXL(-1.57),BNC2(+3.43),BRINP3(+6.4),CABLES1(+2.44),CACNA1C(+3.21),CAMK2B(+3.05),CD44(+3.93),CDC25B(+2.16),CDH1(+3.1),CDH23(-1.49),CDKN1A(-2.32),CEBPD(+2.36),CFH(+16.28),CHGA(+14.1),CHL1(+2.12),CHRM3(+2.33),COL25A1(+3.53),CSMD2(+3.8),CSMD3(+3.28),CTSV(+2.48),CXC…
Cardiovascular Disease,Organismal Injury and Abnormalities	Hypertension of blood vessel	3.5e-12		0.557	48	37	11	ADD2(+2.03),AHR(+3.68),ANGPT1(+5.6),BIRC5(+2.19),BMPR1B(-2.97),BMPR2(+2.38),CA4(-6.57),CACNA1B(-1.83),CACNA1C(+3.21),CHRNA3(+3.24),CHRNA5(+2.29),CHRNA7(+1.94),CHRNB2(+2.52),CPS1(-2.96),CXCR4(+2.78),DDR1(-1.74),DDR2(+4.69),EDNRA(+9.03),EDNRB(-4.04),EPAS1(+2.73),FOSL2(+1.73),GABRA3(+2.43),GABRB3(+4.19),GABRE(+2.41),GABRP(+8.82),GLRA1(+5.8),GRIA1(+1.96),GUCY1A1(+3.08),GUCY1A2(+1.79),HMGCR(-2.13),KCN…
Cellular Development,Connective Tissue Development and Function,Tissue Development	Differentiation of bone	3.82e-12	Increased	2.039	97	80	17	AHR(+3.68),ATRAID(-1.69),AXIN2(+3.19),BMP3(+3.85),BMP4(+1.85),BMPER(+5.67),BMPR1B(-2.97),BMPR2(+2.38),CCL2(+2.16),CCN3(+4.98),CCN4(+3.55),CDK6(+2.2),CEBPD(+2.36),CTNNBIP1(+1.87),DDR2(+4.69),EDNRA(+9.03),EGFR(+2.45),EIF2AK2(+1.57),EPHA2(-1.74),ERBB3(+2.29),FBLIM1(+2.57),FBN1(+1.56),FGFR1(+1.86),FGFR3(-2.34),FHL2(+2.13),FN1(+3.0),FOS(+2.02),FOSL2(+1.73),FOXP1(+2.33),FRZB(+4.89),GABBR1(+1.85),GREM1(…
Cardiovascular Disease,Organismal Injury and Abnormalities	Vaso-occlusion	4.25e-12		0.808	124	86	38	ADARB2(+3.39),AGER(-1.91),AHR(+3.68),ALOX15(-2.39),ANKRD29(+2.61),ASTN2(+1.88),BIRC5(+2.19),BMPR1B(-2.97),CA4(-6.57),CACNA1C(+3.21),CACNA1E(+4.04),CACNA2D1(+3.79),CBS/CBSL(+2.37),CCL2(+2.16),CCN3(+4.98),CD44(+3.93),CDKN1A(-2.32),CNR1(+8.01),CNTNAP5(+13.56),CORO2A(+2.44),CPS1(-2.96),CSMD1(+6.16),CSMD2(+3.8),CTSV(+2.48),DDR1(-1.74),DHFR(+1.79),DISP1(+1.61),DOCK4(+2.36),DOCK9(+1.6),EDNRA(+9.03),EDNR…
Cellular Development,Cellular Growth and Proliferation	Cell proliferation of carcinoma cell lines	4.72e-12	Increased	2.924	113	92	21	ADAM12(+3.56),ADAM9(-1.69),AFAP1-AS1(+1.93),ALK(+3.89),ANGPTL2(+2.25),ANXA2(+1.65),ATF5(+2.66),AXL(-1.57),BBC3(-1.77),BIRC5(+2.19),BMP5(+3.06),CAMKK2(+2.21),CCL2(+2.16),CCN3(+4.98),CCNA2(+1.74),CD44(+3.93),CDC25B(+2.16),CDCA2(+1.8),CDH1(+3.1),CDK14(+2.15),CDK5R1(+2.97),CDKN1A(-2.32),CHRM3(+2.33),COL14A1(+4.09),COL1A1(+3.04),CXCR4(+2.78),DAB2(+1.76),DDR2(+4.69),DGCR5(+4.23),DLC1(+2.74),DLGAP5(+1.7…
Cancer,Organismal Injury and Abnormalities	Clear-cell adenocarcinoma	5.03e-12			179	132	47	ADCY2(-1.72),AGER(-1.91),ANK2(+2.8),ARAP2(+1.94),ARFGEF3(-1.73),ARX(-5.71),ASPM(+2.11),AXIN2(+3.19),AXL(-1.57),BRCA1(+1.77),BSCL2(-1.53),BTRC(+1.67),BUB1B(+1.96),C3orf52(+2.26),C6orf62(-1.69),CBX7(-1.96),CCL2(+2.16),CD44(+3.93),CDC42EP3(+2.0),CDC6(+2.07),CDH1(+3.1),CDH23(-1.49),CDKN1A(-2.32),CENPF(+1.71),CENPU(+2.42),CLDN3(-2.47),CNTN2(+4.37),COL9A1(+1.52),CSMD1(+6.16),CSMD3(+3.28),CUL7(-1.62),DA…
Behavior	Emotional behavior	5.04e-12		0.364	77	64	13	ADCYAP1(+4.25),ARX(-5.71),BCHE(+2.65),BRINP1(+3.57),CACNA1B(-1.83),CACNA1E(+4.04),CCDC141(+4.04),CHRM2(+1.92),CHRM3(+2.33),CHRNB2(+2.52),CNR1(+8.01),CPLX2(+1.98),DRD4(-3.01),FOXM1(+2.16),GABBR1(+1.85),GABBR2(+3.43),GNAO1(+2.29),GRIA1(+1.96),GRIA2(+6.74),GRIK2(+4.11),GRIN2C(-2.81),GRM2(+4.8),GRM5(+3.07),GRM7(+2.77),HDAC6(-1.75),HMGB1(+1.72),HSPA1A/HSPA1B(-1.64),HTR2A(+3.27),IL1R1(+1.71),INHBB(+5.0…
Organ Development,Skeletal and Muscular System Development and Function,Tissue Development	Growth of muscle tissue	5.2e-12		1.266	96	68	28	ABCC4(-2.19),AGER(-1.91),AIF1(-4.76),ALOX15(-2.39),ANG(-3.03),ATOH8(+2.32),BIRC5(+2.19),BMP4(+1.85),BMPR2(+2.38),CACNA1G(+2.29),CCL2(+2.16),CCN3(+4.98),CCN4(+3.55),CDK6(+2.2),CDKN1A(-2.32),CDKN1C(-1.78),CEBPD(+2.36),COL1A1(+3.04),CTNNBIP1(+1.87),CYP1B1(+2.61),DDR1(-1.74),DLL1(-2.54),E2F1(+2.7),E2F3(+1.56),EDNRA(+9.03),EGFR(+2.45),EMD(-1.58),EPHA2(-1.74),FBLN5(+3.95),FGF1(+2.78),FN1(+3.0),FOS(+2.0…
Cancer,Neurological Disease,Organismal Injury and Abnormalities	Central nervous system cancer	5.35e-12		0.611	229	172	57	ABCA8(+3.17),ABCC9(+2.43),ADAM12(+3.56),ADAM9(-1.69),ADAMTS5(+2.45),ADAMTS8(+1.83),ADARB1(+1.73),ADCY8(+3.77),ADGRB1(+2.1),ADGRG1(-1.62),AK5(+2.51),ALCAM(+3.09),ALDOA(-1.51),ALDOC(-3.65),ALK(+3.89),ANGPT1(+5.6),ANK2(+2.8),ANO2(+4.77),APOL4(+2.77),ARF4(-2.49),ARHGAP33(+2.31),ARRB1(+2.62),ASPM(+2.11),ASTN2(+1.88),ATP1B1(-2.11),AXIN2(+3.19),BARHL1(+2.44),BCL11A(+3.04),BIRC5(+2.19),BMF(+1.59),BOC(+1.…
Gene Expression	Transcription of DNA	5.41e-12	Increased	4.467	294	232	62	ABLIM1(+1.7),ABLIM3(+3.62),ADCYAP1(+4.25),AFF3(+1.85),AHR(+3.68),ANG(-3.03),ANKRD1(-2.65),ARF4(-2.49),ARRB1(+2.62),ARX(-5.71),ASCL1(+5.3),ATF5(+2.66),ATOH8(+2.32),AUTS2(+3.63),BACH2(+1.83),BAMBI(+1.63),BARHL1(+2.44),BCL11A(+3.04),BCL11B(+4.28),BHLHE22(+5.15),BIRC5(+2.19),BLZF1(-2.08),BMP3(+3.85),BMP4(+1.85),BMP5(+3.06),BMPR1B(-2.97),BMPR2(+2.38),BRCA1(+1.77),BRF2(-2.19),BRIP1(+2.46),BSX(+7.77),BT…
Developmental Disorder	Hypoplasia	5.51e-12	Decreased	-4.785	125	92	33	ABCC4(-2.19),AHR(+3.68),ALDH1A3(+3.21),ALK(+3.89),ARRB1(+2.62),ARX(-5.71),BACH2(+1.83),BCL11A(+3.04),BCL11B(+4.28),BHLHE22(+5.15),BMP4(+1.85),BMPER(+5.67),BTRC(+1.67),CDC45(+2.65),CDC6(+2.07),CDK6(+2.2),CDKN1C(-1.78),COL2A1(+1.9),CTNNBIP1(+1.87),CYP27B1(-2.51),CYP51A1(-1.69),DACT1(+2.82),DCLK1(+4.51),DNASE2(-1.68),E2F1(+2.7),E2F3(+1.56),EBF2(+3.88),ECE2(-2.4),EDNRA(+9.03),EGFR(+2.45),EMX1(+3.76),…
Metabolic Disease,Neurological Disease,Organismal Injury and Abnormalities,Psychological Disorders	Alzheimer disease	5.8e-12			134	90	44	A2M(+4.05),ADAM12(+3.56),ADGRD1(-2.98),AGER(-1.91),AKAP2(+2.04),ALOX15(-2.39),AQP1(+2.14),ATP1A3(+2.61),ATP1B1(-2.11),ATP8A1(+3.33),BCHE(+2.65),BRCA1(+1.77),C16orf71(-1.91),C4A/C4B(+2.69),CAMK2B(+3.05),CAPN1(+1.7),CBS/CBSL(+2.37),CCL2(+2.16),CCNB1(+1.58),CDC42EP3(+2.0),CDK5R1(+2.97),CHL1(+2.12),CHRM2(+1.92),CHRM3(+2.33),CHRNA3(+3.24),CHRNA5(+2.29),CHRNA7(+1.94),CHRNB2(+2.52),CNR1(+8.01),COL25A1(+…
Cardiovascular System Development and Function	Morphology of cardiovascular system	5.98e-12			199	146	53	ABCC4(-2.19),ABCC8(+4.12),ABCC9(+2.43),ACADL(+2.1),ADAM12(+3.56),ADAM9(-1.69),ADGRD1(-2.98),ADGRG1(-1.62),AHR(+3.68),AIF1(-4.76),ALOX15(-2.39),ANGPT1(+5.6),ANK2(+2.8),ANKRD1(-2.65),ARSB(+1.72),AXL(-1.57),BIRC5(+2.19),BMP1(+1.86),BMP4(+1.85),BMPER(+5.67),BMPR2(+2.38),BNIP3(-1.92),BSCL2(-1.53),CACNA1C(+3.21),CACNA1F(-3.83),CACNA2D1(+3.79),CAPN1(+1.7),CBS/CBSL(+2.37),CCL2(+2.16),CCN3(+4.98),CCNA2(+1…
Cancer,Hematological Disease,Organismal Injury and Abnormalities	Malignant myeloid neoplasm	6.03e-12		0.364	330	253	77	ABCA12(+2.54),ADAM12(+3.56),ADAMTS17(+4.3),ADAMTS5(+2.45),ADCY1(+3.35),ADCYAP1R1(+5.81),AFF3(+1.85),AKAP2(+2.04),ALK(+3.89),ANGPT1(+5.6),ANGPTL2(+2.25),ANK2(+2.8),ANKRD26(-1.77),ANKS1B(+2.02),ANO2(+4.77),ANO4(+2.57),ANXA2(+1.65),APCDD1(+15.97),APEX1(+1.71),ARHGAP31(+4.04),ATL1(+2.14),ATP1B1(-2.11),ATP8A2(+2.14),AXIN2(+3.19),AXL(-1.57),B4GALNT1(+3.19),BACH2(+1.83),BBC3(-1.77),BCL11B(+4.28),BIRC5(+…
Embryonic Development,Organismal Development	Development of abdomen	6.14e-12		1.401	135	93	42	ADCYAP1(+4.25),AGER(-1.91),AHR(+3.68),ALDH1A3(+3.21),ANGPT1(+5.6),ANXA2(+1.65),AQP1(+2.14),ARSB(+1.72),ARX(-5.71),ASCL1(+5.3),AXL(-1.57),BICC1(+4.24),BMF(+1.59),BMP4(+1.85),CD44(+3.93),CDKN1A(-2.32),CENPF(+1.71),CTNNBIP1(+1.87),CXCL14(+1.96),CXCR4(+2.78),CYP27B1(-2.51),DACT2(+5.62),DCHS1(+1.75),EAF2(-4.18),EDNRA(+9.03),EDNRB(-4.04),EHD4(-2.45),EIF2AK3(-2.83),EMX2(-1.97),EPAS1(+2.73),EPOR(-2.66),E…
Cellular Growth and Proliferation,Connective Tissue Development and Function,Tissue Development	Proliferation of connective tissue cells	6.42e-12	Increased	2.316	139	110	29	ADIPOR1(-1.58),AGER(-1.91),AHR(+3.68),AIF1(-4.76),ALK(+3.89),ANXA2(+1.65),AQP1(+2.14),ATRAID(-1.69),BCL11B(+4.28),BMP4(+1.85),BMPR1B(-2.97),BRCA1(+1.77),BTRC(+1.67),C1QL4(+4.27),CBX7(-1.96),CCDC80(+1.98),CCL2(+2.16),CCN3(+4.98),CCN4(+3.55),CCNA2(+1.74),CCNB1(+1.58),CD109(+2.35),CD44(+3.93),CDC6(+2.07),CDH1(+3.1),CDK6(+2.2),CDKN1A(-2.32),CHGA(+14.1),CIB1(-2.02),CNR1(+8.01),COL14A1(+4.09),COL1A1(+3…
Connective Tissue Disorders,Developmental Disorder,Gastrointestinal Disease,Organismal Development,Organismal Injury and Abnormalities,Skeletal and Muscular Disorders	Congenital malformation of face	6.44e-12			60	44	16	ABCA12(+2.54),AHR(+3.68),BOC(+1.7),CBS/CBSL(+2.37),CDH1(+3.1),CDK20(-1.81),CDKN1A(-2.32),CDON(+1.56),CELSR2(-1.92),COL2A1(+1.9),CYP51A1(-1.69),DHCR7(-1.88),DHFR(+1.79),DISP1(+1.61),DLL1(-2.54),DNMT3B(+2.47),EDNRB(-4.04),EGFR(+2.45),ESRP1(+3.38),FGFR1(+1.86),FGFR3(-2.34),FGFRL1(-1.69),FOXF2(+7.89),GABRB3(+4.19),GAS1(+3.38),H19(+1.99),IFT172(-1.52),INSIG1(-2.21),INSIG2(-2.22),IRF6(+2.66),MAP2K1(-1.…
Cellular Growth and Proliferation	Colony formation	6.51e-12	Increased	2.039	141	114	27	AFAP1-AS1(+1.93),AGER(-1.91),AHR(+3.68),ALK(+3.89),ANKRD1(-2.65),AXL(-1.57),BACH2(+1.83),BAMBI(+1.63),BBC3(-1.77),BIRC5(+2.19),BMP4(+1.85),BRCA1(+1.77),C1orf61(+7.51),CABLES1(+2.44),CAPN1(+1.7),CCL2(+2.16),CCNB1(+1.58),CD44(+3.93),CDC25B(+2.16),CDCA7(+3.62),CDKN1A(-2.32),CHGA(+14.1),CRNDE(+3.25),CTNNBIP1(+1.87),DCN(+24.15),DDIT3(-2.04),DHFR(+1.79),DIABLO(-1.53),DLC1(+2.74),DNAJA3(-1.56),DOCK4(+2.…
Skeletal and Muscular System Development and Function,Tissue Development	Growth of smooth muscle	7.14e-12		1.206	75	54	21	ABCC4(-2.19),AGER(-1.91),AIF1(-4.76),ALOX15(-2.39),ANG(-3.03),BIRC5(+2.19),BMP4(+1.85),BMPR2(+2.38),CACNA1G(+2.29),CCL2(+2.16),CCN3(+4.98),CCN4(+3.55),CDK6(+2.2),CDKN1A(-2.32),CDKN1C(-1.78),CEBPD(+2.36),COL1A1(+3.04),CTNNBIP1(+1.87),CYP1B1(+2.61),DDR1(-1.74),E2F1(+2.7),E2F3(+1.56),EDNRA(+9.03),EGFR(+2.45),EMD(-1.58),FBLN5(+3.95),FOS(+2.02),FOXF2(+7.89),FOXM1(+2.16),FOXO1(+2.33),FOXP1(+2.33),HAS2(…
Cancer,Organismal Injury and Abnormalities	Advanced malignant solid tumor	7.19e-12		1.234	167	119	48	ABCA8(+3.17),ACP5(-2.76),ADAM12(+3.56),ADAM9(-1.69),ALK(+3.89),ANGPTL2(+2.25),ANXA2(+1.65),AXIN2(+3.19),AXL(-1.57),BBC3(-1.77),BIRC5(+2.19),BMPR2(+2.38),BRCA1(+1.77),BRIP1(+2.46),C4A/C4B(+2.69),CALB2(+6.38),CALD1(+1.68),CCL2(+2.16),CD44(+3.93),CDH1(+3.1),CDK6(+2.2),CEBPD(+2.36),CEMIP(+3.39),CFH(+16.28),CHGA(+14.1),CHRNA3(+3.24),CLDN3(-2.47),COL15A1(+2.47),COLEC12(+1.98),CRABP2(-1.58),CRNDE(+3.25)…
Cancer,Gastrointestinal Disease,Organismal Injury and Abnormalities	Esophageal adenocarcinoma	7.73e-12			106	90	16	ABCA8(+3.17),ABCC4(-2.19),ABCC5(+1.68),ABCC9(+2.43),ADARB1(+1.73),AJAP1(+2.43),AKAP6(+1.88),ANO1(+5.01),APCDD1L(+2.38),ARHGAP28(+3.07),ARHGEF40(+1.86),ASTN2(+1.88),ATP6V1C2(+4.46),BCHE(+2.65),BOC(+1.7),BRINP2(+3.07),BRINP3(+6.4),BRSK1(-1.69),CA10(+5.2),CACNA1E(+4.04),CCDC102B(-4.43),CD44(+3.93),CDH23(-1.49),CELSR2(-1.92),CENPF(+1.71),CHD5(+3.82),CHRNA7(+1.94),CHST11(+1.74),CNTNAP4(+2.49),CNTNAP5(…
Connective Tissue Disorders,Developmental Disorder,Gastrointestinal Disease,Organismal Injury and Abnormalities,Skeletal and Muscular Disorders	Orofacial dysmorphism	7.89e-12		-1.387	61	45	16	ABCA12(+2.54),AHR(+3.68),BMP4(+1.85),BOC(+1.7),CBS/CBSL(+2.37),CDH1(+3.1),CDK20(-1.81),CDKN1A(-2.32),CDON(+1.56),CELSR2(-1.92),COL2A1(+1.9),CYP51A1(-1.69),DHCR7(-1.88),DHFR(+1.79),DISP1(+1.61),DLL1(-2.54),DNMT3B(+2.47),EDNRB(-4.04),EGFR(+2.45),ESRP1(+3.38),FGFR1(+1.86),FGFR3(-2.34),FGFRL1(-1.69),FOXF2(+7.89),GABRB3(+4.19),GAS1(+3.38),H19(+1.99),IFT172(-1.52),INSIG1(-2.21),INSIG2(-2.22),IRF6(+2.66…
Cellular Development,Cellular Growth and Proliferation,Organ Development,Skeletal and Muscular System Development and Function,Tissue Development	Proliferation of muscle cells	7.92e-12		1.266	95	68	27	ABCC4(-2.19),AGER(-1.91),AIF1(-4.76),ALOX15(-2.39),ANG(-3.03),ATOH8(+2.32),BIRC5(+2.19),BMP4(+1.85),BMPR2(+2.38),CACNA1G(+2.29),CCL2(+2.16),CCN3(+4.98),CCN4(+3.55),CDK6(+2.2),CDKN1A(-2.32),CDKN1C(-1.78),CEBPD(+2.36),COL1A1(+3.04),CTNNBIP1(+1.87),CYP1B1(+2.61),DDR1(-1.74),E2F1(+2.7),E2F3(+1.56),EDNRA(+9.03),EGFR(+2.45),EMD(-1.58),EPHA2(-1.74),FBLN5(+3.95),FGF1(+2.78),FN1(+3.0),FOS(+2.02),FOXF2(+7.…
Connective Tissue Development and Function,Tissue Development	Growth of connective tissue	8.45e-12	Increased	2.651	149	117	32	ADIPOR1(-1.58),AGER(-1.91),AHR(+3.68),AIF1(-4.76),ALK(+3.89),ANXA2(+1.65),AQP1(+2.14),ATRAID(-1.69),BCL11B(+4.28),BMP4(+1.85),BMPR1B(-2.97),BRCA1(+1.77),BTRC(+1.67),C1QL4(+4.27),CBX7(-1.96),CCDC80(+1.98),CCL2(+2.16),CCN3(+4.98),CCN4(+3.55),CCNA2(+1.74),CCNB1(+1.58),CD109(+2.35),CD44(+3.93),CDC6(+2.07),CDH1(+3.1),CDK6(+2.2),CDKN1A(-2.32),CHGA(+14.1),CIB1(-2.02),CNR1(+8.01),COL14A1(+4.09),COL1A1(+3…
Cancer,Organismal Injury and Abnormalities	Benign connective or soft tissue neoplasm	8.6e-12			94	77	17	ABCA8(+3.17),ADAM12(+3.56),ADARB1(+1.73),AGER(-1.91),AHR(+3.68),ALDOA(-1.51),ANGPT1(+5.6),ATRNL1(+1.51),AXIN2(+3.19),CDC42EP3(+2.0),CFH(+16.28),COL13A1(+2.88),COL14A1(+4.09),COL15A1(+2.47),COL16A1(+5.19),COL17A1(+6.4),COL1A1(+3.04),COL21A1(+5.93),COL23A1(+2.5),COL25A1(+3.53),COL27A1(+1.86),COL2A1(+1.9),COL3A1(+8.18),COL5A1(+2.19),COL6A2(+1.72),COL8A2(+5.86),COL9A1(+1.52),COL9A2(+2.15),COL9A3(+4.0…
Gene Expression	Expression of RNA	8.61e-12	Increased	4.912	417	312	105	A2M(+4.05),ABLIM1(+1.7),ABLIM3(+3.62),ADCYAP1(+4.25),AFF2(+2.21),AFF3(+1.85),AGER(-1.91),AHR(+3.68),AIF1(-4.76),ANG(-3.03),ANK2(+2.8),ANKRD1(-2.65),APBA1(+2.1),APBA3(-1.67),ARF4(-2.49),ARRB1(+2.62),ARX(-5.71),ASCL1(+5.3),ASPM(+2.11),ASTN2(+1.88),ATF5(+2.66),ATOH8(+2.32),ATP1B1(-2.11),ATRAID(-1.69),AUTS2(+3.63),BACH2(+1.83),BAMBI(+1.63),BARHL1(+2.44),BCL11A(+3.04),BCL11B(+4.28),BHLHE22(+5.15),BIRC…
Cancer,Organismal Injury and Abnormalities	Advanced extracranial solid tumor	8.67e-12		1.147	140	102	38	ABCA8(+3.17),ADAM12(+3.56),ALK(+3.89),ANGPTL2(+2.25),ANXA2(+1.65),AXL(-1.57),BBC3(-1.77),BIRC5(+2.19),BMPR2(+2.38),BRCA1(+1.77),C4A/C4B(+2.69),CALB2(+6.38),CCL2(+2.16),CD44(+3.93),CDH1(+3.1),CDK6(+2.2),CEBPD(+2.36),CEMIP(+3.39),CFH(+16.28),CHRNA3(+3.24),CLDN3(-2.47),COL15A1(+2.47),COLEC12(+1.98),CRABP2(-1.58),CRNDE(+3.25),CTNNAL1(+1.6),CXCR4(+2.78),DAB2(+1.76),DDR1(-1.74),DDR2(+4.69),DHFR(+1.79),…
Developmental Disorder	Aplasia or hypoplasia	8.96e-12	Decreased	-4.793	131	95	36	ABCC4(-2.19),AHR(+3.68),ALDH1A3(+3.21),ALK(+3.89),ARRB1(+2.62),ARX(-5.71),AXL(-1.57),BACH2(+1.83),BCL11A(+3.04),BCL11B(+4.28),BHLHE22(+5.15),BMF(+1.59),BMP4(+1.85),BMPER(+5.67),BTRC(+1.67),CDC45(+2.65),CDC6(+2.07),CDK6(+2.2),CDKN1C(-1.78),CEP290(-1.67),COL2A1(+1.9),CTNNBIP1(+1.87),CYP27B1(-2.51),CYP51A1(-1.69),DACT1(+2.82),DCLK1(+4.51),DNASE2(-1.68),E2F1(+2.7),E2F3(+1.56),EBF2(+3.88),ECE2(-2.4),E…
Embryonic Development,Organ Development,Organismal Development,Respiratory System Development and Function,Tissue Development	Formation of lung	9.22e-12		0.914	81	61	20	ABCA12(+2.54),ARRB1(+2.62),ASCL1(+5.3),BMP4(+1.85),BMPR2(+2.38),CBS/CBSL(+2.37),CCL2(+2.16),CDKN1A(-2.32),COL2A1(+1.9),COL3A1(+8.18),DCHS1(+1.75),DENND1B(+1.65),DHCR7(-1.88),EGFR(+2.45),ELK3(+2.33),EPAS1(+2.73),EPOR(-2.66),FBLN1(+4.81),FBN1(+1.56),FGF1(+2.78),FGFR1(+1.86),FGFR3(-2.34),FOXM1(+2.16),FOXP1(+2.33),GREM1(-1.83),HEG1(+1.87),HEY2(+4.4),IGFBP5(+2.03),INHBB(+5.09),INPP5D(-3.53),JMJD6(-1.9…
Behavior,Nervous System Development and Function	Memory	9.4e-12	Increased	3.217	75	59	16	ABCC8(+4.12),ADCY1(+3.35),ADCY3(+1.72),ADCY8(+3.77),ADCYAP1(+4.25),ATP1A3(+2.61),BRINP1(+3.57),CAMK2B(+3.05),CDK5R1(+2.97),CEBPD(+2.36),CHRM2(+1.92),CHRNA7(+1.94),CHRNB2(+2.52),CNR1(+8.01),CPLX2(+1.98),CUX2(+1.74),DRD4(-3.01),EIF2AK2(+1.57),GABBR1(+1.85),GABBR2(+3.43),GABRB3(+4.19),GALNS(+1.72),GRIA1(+1.96),GRIA2(+6.74),GRIA4(+2.25),GRIK2(+4.11),GRM7(+2.77),HDAC6(-1.75),HES5(-2.3),HTR2A(+3.27),IL…
Cancer,Organismal Injury and Abnormalities,Renal and Urological Disease	Renal clear cell adenocarcinoma	1.12e-11			171	127	44	ADCY2(-1.72),AGER(-1.91),ANK2(+2.8),ARAP2(+1.94),ARFGEF3(-1.73),ARX(-5.71),ASPM(+2.11),AXIN2(+3.19),AXL(-1.57),BRCA1(+1.77),BSCL2(-1.53),BTRC(+1.67),BUB1B(+1.96),C3orf52(+2.26),C6orf62(-1.69),CBX7(-1.96),CCL2(+2.16),CD44(+3.93),CDC42EP3(+2.0),CDC6(+2.07),CDH1(+3.1),CDH23(-1.49),CDKN1A(-2.32),CENPF(+1.71),CENPU(+2.42),CNTN2(+4.37),COL9A1(+1.52),CSMD1(+6.16),CSMD3(+3.28),CUL7(-1.62),DAD1(-1.61),DCN…
Cellular Development,Connective Tissue Development and Function,Tissue Development	Differentiation of bone cells	1.24e-11	Increased	2.059	95	78	17	AHR(+3.68),ATRAID(-1.69),AXIN2(+3.19),BMP3(+3.85),BMP4(+1.85),BMPER(+5.67),BMPR1B(-2.97),BMPR2(+2.38),CCL2(+2.16),CCN3(+4.98),CCN4(+3.55),CDK6(+2.2),CEBPD(+2.36),CTNNBIP1(+1.87),DDR2(+4.69),EDNRA(+9.03),EGFR(+2.45),EIF2AK2(+1.57),EPHA2(-1.74),ERBB3(+2.29),FBLIM1(+2.57),FBN1(+1.56),FGFR1(+1.86),FGFR3(-2.34),FHL2(+2.13),FN1(+3.0),FOS(+2.02),FOSL2(+1.73),FOXP1(+2.33),FRZB(+4.89),GABBR1(+1.85),GREM1(…
Embryonic Development,Organismal Development,Tissue Development	Growth of embryonic tissue	1.53e-11	Increased	3.138	73	57	16	ADCYAP1(+4.25),AHR(+3.68),ARX(-5.71),ASCL1(+5.3),ASPM(+2.11),BMP4(+1.85),CD44(+3.93),CDK6(+2.2),CDKN1A(-2.32),CDON(+1.56),CNR1(+8.01),CTNNBIP1(+1.87),CUX2(+1.74),CXCL14(+1.96),DCT(+10.71),DLL1(-2.54),EMX2(-1.97),EPAS1(+2.73),EPHB1(+2.81),FGFR1(+1.86),FGFR3(-2.34),FUT9(+2.84),GALNS(+1.72),GAP43(+4.63),GAS1(+3.38),GREM1(-1.83),HHIP(+2.74),IFT20(-1.73),IGFBP5(+2.03),INHBA(+3.11),ISL1(+4.84),KCNA1(+2…
Cellular Movement,Nervous System Development and Function	Guidance of axons	1.68e-11		1.011	55	45	10	ABLIM1(+1.7),ALCAM(+3.09),ARX(-5.71),BHLHE22(+5.15),BMPR1B(-2.97),BOC(+1.7),CDK5R1(+2.97),CHL1(+2.12),CHN1(-1.64),CNTN1(+3.34),CNTN2(+4.37),CNTN4(+3.64),CXCR4(+2.78),DAB1(+2.05),DCLK1(+4.51),DCX(+1.97),DOK5(+2.15),DOK6(+1.99),EPHA5(+3.46),EPHB1(+2.81),ETV4(+2.16),FEZF1(-11.57),FEZF2(-3.35),GALNS(+1.72),GAP43(+4.63),GAS1(+3.38),GFRA2(+7.05),LHX4(+2.5),LHX5(-1.77),NEUROG2(+5.17),NFASC(+2.51),NR2F1(…
Cellular Development,Cellular Growth and Proliferation,Organ Development,Skeletal and Muscular System Development and Function,Tissue Development	Proliferation of smooth muscle cells	1.68e-11		1.319	74	53	21	ABCC4(-2.19),AGER(-1.91),AIF1(-4.76),ALOX15(-2.39),ANG(-3.03),BIRC5(+2.19),BMP4(+1.85),BMPR2(+2.38),CACNA1G(+2.29),CCL2(+2.16),CCN3(+4.98),CCN4(+3.55),CDK6(+2.2),CDKN1A(-2.32),CDKN1C(-1.78),CEBPD(+2.36),COL1A1(+3.04),CTNNBIP1(+1.87),CYP1B1(+2.61),DDR1(-1.74),E2F1(+2.7),E2F3(+1.56),EDNRA(+9.03),EGFR(+2.45),EMD(-1.58),FBLN5(+3.95),FOS(+2.02),FOXF2(+7.89),FOXM1(+2.16),FOXO1(+2.33),FOXP1(+2.33),HAS2(…
Nervous System Development and Function,Organ Morphology,Organismal Development	Morphology of forebrain	1.76e-11			68	49	19	ADCY1(+3.35),ADCY3(+1.72),ALK(+3.89),ARX(-5.71),ASCL1(+5.3),ASPM(+2.11),ATP1B2(-1.79),AXL(-1.57),BHLHE22(+5.15),BRSK1(-1.69),BRSK2(+2.27),CDK5R1(+2.97),CDON(+1.56),CELSR2(-1.92),CHL1(+2.12),CHRNB2(+2.52),COL2A1(+1.9),DAB1(+2.05),DCLK1(+4.51),DISP1(+1.61),EBF1(+17.28),EBF2(+3.88),EGFR(+2.45),EMX1(+3.76),EMX2(-1.97),ERBB3(+2.29),FEZF1(-11.57),FEZF2(-3.35),GAP43(+4.63),GM2A(-1.66),HAP1(-2.4),HES5(-2…
Metabolic Disease,Organismal Injury and Abnormalities	Amyloidosis	1.81e-11			138	94	44	A2M(+4.05),ADAM12(+3.56),ADGRD1(-2.98),AGER(-1.91),AKAP2(+2.04),ALOX15(-2.39),AQP1(+2.14),ATP1A3(+2.61),ATP1B1(-2.11),ATP8A1(+3.33),BCHE(+2.65),BRCA1(+1.77),C16orf71(-1.91),C4A/C4B(+2.69),CAMK2B(+3.05),CAPN1(+1.7),CBS/CBSL(+2.37),CCL2(+2.16),CCNB1(+1.58),CDC42EP3(+2.0),CDK5R1(+2.97),CHL1(+2.12),CHRM2(+1.92),CHRM3(+2.33),CHRNA3(+3.24),CHRNA5(+2.29),CHRNA7(+1.94),CHRNB2(+2.52),CNR1(+8.01),COL25A1(+…
Neurological Disease	Ataxia	1.82e-11	Decreased	-2.552	72	56	16	APBA1(+2.1),ARX(-5.71),ATP1A3(+2.61),ATP8A2(+2.14),B4GALNT1(+3.19),CACNA1G(+2.29),CAMK2B(+3.05),CBLN1(+5.11),CHRNA7(+1.94),CHRNB2(+2.52),CNTN1(+3.34),CRX(+5.29),DAB1(+2.05),E2F1(+2.7),EBF3(+4.04),ELOVL5(-2.06),ENO2(-1.81),EPB41L3(+1.91),FAT2(+3.44),FBXO41(+2.17),FGF14(+2.35),FUCA1(-2.68),GABBR1(+1.85),GNB3(+2.16),GOLGA2(-1.69),GRID2(+6.81),HCN2(+2.31),HES5(-2.3),HSPA5(-1.75),IGFBP5(+2.03),IL1R1(+…
Embryonic Development,Organ Development,Organismal Development,Skeletal and Muscular System Development and Function,Tissue Development	Formation of muscle	1.96e-11		0.662	96	77	19	ADAM12(+3.56),ADGRB1(+2.1),AHR(+3.68),ANGPT1(+5.6),ANKRD1(-2.65),BMP4(+1.85),BMP5(+3.06),BOC(+1.7),CCN3(+4.98),CCNA2(+1.74),CDKN1A(-2.32),CDON(+1.56),CENPF(+1.71),COL25A1(+3.53),CXCR4(+2.78),DDR1(-1.74),DIAPH3(+1.93),DISP1(+1.61),DOCK1(+1.85),DOCK5(+1.78),EMD(-1.58),EPHA2(-1.74),EPOR(-2.66),ERBB3(+2.29),FGFR1(+1.86),FGFRL1(-1.69),FHL2(+2.13),FN1(+3.0),FOSL2(+1.73),FOXC1(+7.92),FOXO1(+2.33),GAA(-1…
Cell-To-Cell Signaling and Interaction,Nervous System Development and Function	Action potential of cells	1.99e-11		-0.49	47	44	3	ADCY1(+3.35),CACNA1G(+2.29),CALM1 (includes others)(+1.49),CHRNA7(+1.94),CHRNB2(+2.52),CNR1(+8.01),CPLX2(+1.98),FOXO1(+2.33),GABBR2(+3.43),GDAP1(+2.62),GLRA1(+5.8),GRIA1(+1.96),GRIA2(+6.74),GRIA4(+2.25),GRID2(+6.81),GRIK2(+4.11),GRM2(+4.8),GRM5(+3.07),HCN1(+3.12),HCN2(+2.31),KALRN(+2.8),KCNA1(+2.6),KCNC1(+3.12),KCNC2(+7.64),KCND2(+3.88),KCNH2(-1.73),KCNK3(+5.6),KCNMA1(+2.17),KCNQ2(+2.98),KCTD12(+…
Cardiovascular System Development and Function,Embryonic Development,Organ Development,Organismal Development,Tissue Development	Cardiogenesis	2e-11		0.993	124	93	31	ANGPT1(+5.6),ANKRD1(-2.65),BICC1(+4.24),BMP4(+1.85),BMP5(+3.06),BMPR2(+2.38),BRCA1(+1.77),CACNA1C(+3.21),CBS/CBSL(+2.37),CCDC151(-2.08),CCN3(+4.98),CCNA2(+1.74),CDKN1A(-2.32),CEP290(-1.67),COL2A1(+1.9),COL3A1(+8.18),COL5A1(+2.19),CRELD1(-2.41),CXCR4(+2.78),CYP51A1(-1.69),DCHS1(+1.75),DIAPH3(+1.93),DISP1(+1.61),DLC1(+2.74),DLL1(-2.54),DNAH11(+2.5),ECE2(-2.4),EDNRA(+9.03),EGFR(+2.45),EMILIN1(+5.93)…
Cancer,Organismal Injury and Abnormalities	Development of benign tumor	2.12e-11		-1.801	117	91	26	ABCC4(-2.19),ADGRD1(-2.98),AHR(+3.68),ALDOC(-3.65),ALOX15(-2.39),ANGPTL2(+2.25),ANXA2(+1.65),ASS1(+2.45),AXIN2(+3.19),BACE2(+1.84),BBC3(-1.77),BOK(+2.12),BRINP3(+6.4),BTRC(+1.67),BUB1B(+1.96),CAMK2B(+3.05),CBX7(-1.96),CCDC80(+1.98),CCNB1(+1.58),CD44(+3.93),CDH1(+3.1),CDH23(-1.49),CDKN1A(-2.32),CEBPD(+2.36),CEMIP(+3.39),CFH(+16.28),CHRM3(+2.33),CNR1(+8.01),CRNDE(+3.25),CXCL14(+1.96),CYP1B1(+2.61),…
Hereditary Disorder,Organismal Injury and Abnormalities,Skeletal and Muscular Disorders	Autosomal dominant myopathy	2.62e-11			57	44	13	ABCC9(+2.43),ABLIM1(+1.7),ANK2(+2.8),ANKRD1(-2.65),ASPN(+14.68),ATL1(+2.14),ATP1A3(+2.61),BMP1(+1.86),BSCL2(-1.53),CA4(-6.57),CACNA1C(+3.21),CACNA2D1(+3.79),CALD1(+1.68),CHCHD10(-1.98),COL1A1(+3.04),COL3A1(+8.18),COL5A1(+2.19),COL6A2(+1.72),COLEC12(+1.98),DAB2(+1.76),EMILIN1(+5.93),FAM111B(+2.72),GDAP1(+2.62),GPD1L(+2.02),HCN4(+2.06),HEY2(+4.4),KCNA1(+2.6),KCNA5(+3.67),KCND3(+5.42),KCNH2(-1.73),K…
Cell Morphology,Nervous System Development and Function	Innervation of tissue	2.69e-11		0.199	37	30	7	ADCY3(+1.72),BMP4(+1.85),BOC(+1.7),CACNA1F(-3.83),CBLN1(+5.11),CCDC141(+4.04),CDK5R1(+2.97),CHN1(-1.64),EGFR(+2.45),FGFR3(-2.34),FRZB(+4.89),GABRB3(+4.19),GAP43(+4.63),GFRA2(+7.05),GRIA2(+6.74),GRID2(+6.81),KCNMA1(+2.17),LMX1B(+7.02),NFATC2(+2.1),NOS1(+2.43),NOS3(-5.35),NPTX2(+2.67),NPTXR(+1.92),NR2F1(-5.84),NTF3(+3.71),PLCB4(+1.56),PLXNA4(+15.6),POU4F1(+8.63),PSAP(-1.61),RIMS2(+2.06),SEZ6(+3.02)…
Cancer,Hematological Disease,Immunological Disease,Organismal Injury and Abnormalities	Acute leukemia	2.97e-11		-0.33	323	248	75	ADAM12(+3.56),ADAMTS5(+2.45),ADARB2(+3.39),ADCY1(+3.35),ADCY3(+1.72),ADCYAP1R1(+5.81),AFF3(+1.85),AKAP2(+2.04),ALK(+3.89),ANGPT1(+5.6),ANGPTL2(+2.25),ANK2(+2.8),ANKRD26(-1.77),ANKS1B(+2.02),ANO2(+4.77),ANO4(+2.57),ANXA2(+1.65),APCDD1(+15.97),APEX1(+1.71),ARHGAP31(+4.04),ATL1(+2.14),ATP1B1(-2.11),ATP8A2(+2.14),AXIN2(+3.19),AXL(-1.57),B4GALNT1(+3.19),BACH2(+1.83),BBC3(-1.77),BCL11B(+4.28),BIRC5(+2.…
Organismal Development	Growth of organism	2.98e-11	Increased	2.372	176	132	44	ADARB1(+1.73),ADCYAP1(+4.25),AHR(+3.68),AIF1(-4.76),ANKRD1(-2.65),APBA1(+2.1),AQP1(+2.14),ARX(-5.71),ASCL1(+5.3),ASPM(+2.11),ATF5(+2.66),BBC3(-1.77),BMP4(+1.85),BMPR1B(-2.97),BMPR2(+2.38),BRCA1(+1.77),BSX(+7.77),CAMK2B(+3.05),CBS/CBSL(+2.37),CD44(+3.93),CDK11A(-1.68),CDK6(+2.2),CDKN1A(-2.32),CDON(+1.56),CEBPD(+2.36),CHAF1A(+2.72),CLIC4(+1.64),CNR1(+8.01),CTNNBIP1(+1.87),CUL7(-1.62),CUX2(+1.74),CX…
Post-Translational Modification	Phosphorylation of protein	3.19e-11	Increased	3.884	149	114	35	ADCYAP1(+4.25),AGER(-1.91),AHR(+3.68),AIF1(-4.76),AKAP6(+1.88),ALK(+3.89),ANG(-3.03),ANGPT1(+5.6),ANXA2(+1.65),ARRB1(+2.62),AXIN2(+3.19),BIRC5(+2.19),BMP4(+1.85),BMPR1B(-2.97),BMPR2(+2.38),BRSK1(-1.69),BRSK2(+2.27),C9orf72(-2.4),CALM1 (includes others)(+1.49),CAMK2B(+3.05),CAMKK2(+2.21),CCL2(+2.16),CCNB1(+1.58),CD109(+2.35),CD44(+3.93),CD72(-2.04),CDC25B(+2.16),CDK11A(-1.68),CDK2AP1(+2.27),CDK5RA…
Cardiovascular Disease,Organismal Injury and Abnormalities,Respiratory Disease	Pulmonary Hypertension	3.68e-11		1.279	43	33	10	ANGPT1(+5.6),BIRC5(+2.19),BMPR1B(-2.97),BMPR2(+2.38),CA4(-6.57),CACNA1B(-1.83),CACNA1C(+3.21),CHRNA3(+3.24),CHRNA5(+2.29),CHRNA7(+1.94),CHRNB2(+2.52),CPS1(-2.96),CXCR4(+2.78),DDR1(-1.74),DDR2(+4.69),EDNRA(+9.03),EDNRB(-4.04),EPAS1(+2.73),FOSL2(+1.73),GABRA3(+2.43),GABRB3(+4.19),GABRE(+2.41),GABRP(+8.82),GLRA1(+5.8),GRIA1(+1.96),KCNA5(+3.67),KCNK3(+5.6),KDR(+2.05),NOS3(-5.35),NPPB(-2.63),NPR3(+2.9…
Cellular Growth and Proliferation	Colony formation of cells	3.81e-11		1.889	126	103	23	AFAP1-AS1(+1.93),AHR(+3.68),ALK(+3.89),ANKRD1(-2.65),BACH2(+1.83),BAMBI(+1.63),BBC3(-1.77),BIRC5(+2.19),BMP4(+1.85),BRCA1(+1.77),C1orf61(+7.51),CABLES1(+2.44),CAPN1(+1.7),CCL2(+2.16),CD44(+3.93),CDCA7(+3.62),CDKN1A(-2.32),CRNDE(+3.25),CTNNBIP1(+1.87),DCN(+24.15),DDIT3(-2.04),DHFR(+1.79),DIABLO(-1.53),DLC1(+2.74),DNAJA3(-1.56),DOCK4(+2.36),DYRK3(-1.7),E2F1(+2.7),E2F3(+1.56),EGFR(+2.45),EIF2AK2(+1.…
Nervous System Development and Function	Coordination	3.89e-11	Increased	4.2	60	48	12	ATP1A3(+2.61),ATP1B2(-1.79),B4GALNT1(+3.19),BRINP1(+3.57),CACNA1G(+2.29),CALB2(+6.38),CAMK2B(+3.05),CBLN1(+5.11),CCN4(+3.55),CD44(+3.93),CDK5R1(+2.97),CHRNA7(+1.94),CHRNB2(+2.52),CLDN19(+2.25),CNTN1(+3.34),CPLX2(+1.98),DMRT3(-3.67),DRD4(-3.01),EBF2(+3.88),ELAVL3(+2.83),ELAVL4(+5.59),EMD(-1.58),FUCA1(-2.68),GAA(-1.56),GABRB3(+4.19),GALNT14(+2.34),GDAP1(+2.62),GM2A(-1.66),GNAO1(+2.29),GRIA1(+1.96),…
Cell Death and Survival	Apoptosis of tumor cell lines	3.97e-11		-0.766	256	184	72	ADIPOR1(-1.58),AFAP1-AS1(+1.93),AGER(-1.91),AHR(+3.68),ALCAM(+3.09),ALK(+3.89),ALOX15(-2.39),ANKRD1(-2.65),ANXA2(+1.65),ARSB(+1.72),ATF5(+2.66),BACH2(+1.83),BBC3(-1.77),BIRC5(+2.19),BMF(+1.59),BMP4(+1.85),BMPR1B(-2.97),BNIP3(-1.92),BOK(+2.12),BRCA1(+1.77),BTRC(+1.67),CAMKK2(+2.21),CAPN1(+1.7),CCDC6(+1.66),CCDC80(+1.98),CCNB1(+1.58),CD44(+3.93),CDC25A(+1.75),CDC6(+2.07),CDCA2(+1.8),CDH1(+3.1),CDK5…
Gastrointestinal Disease,Organismal Injury and Abnormalities	Benign oral disorder	4.31e-11		-1.912	103	76	27	ABCA12(+2.54),AHR(+3.68),ATP1B1(-2.11),BMP4(+1.85),BOC(+1.7),C4A/C4B(+2.69),CBS/CBSL(+2.37),CD44(+3.93),CDH1(+3.1),CDK20(-1.81),CDKN1A(-2.32),CDKN1C(-1.78),CDON(+1.56),CELSR2(-1.92),CHRM2(+1.92),CHRM3(+2.33),COL16A1(+5.19),COL2A1(+1.9),CTSC(+2.16),CXCR4(+2.78),CYP51A1(-1.69),DHCR7(-1.88),DHFR(+1.79),DIABLO(-1.53),DISP1(+1.61),DLL1(-2.54),DNMT3B(+2.47),E2F1(+2.7),E2F2(+4.11),EDAR(+2.88),EDARADD(+3…
Organismal Injury and Abnormalities,Respiratory Disease	Dyspnea	4.82e-11	Decreased	-2.589	41	30	11	ALDH1A3(+3.21),ARRB1(+2.62),ASCL1(+5.3),BRCA1(+1.77),CD44(+3.93),CDKN1A(-2.32),COL2A1(+1.9),CUL7(-1.62),DCN(+24.15),DLX2(+2.73),E2F3(+1.56),EDNRA(+9.03),EGFR(+2.45),ELK3(+2.33),EPAS1(+2.73),FGFR3(-2.34),FGFRL1(-1.69),HEY2(+4.4),HTR2A(+3.27),ITGA9(+2.27),MAFB(+3.39),MDFI(+2.04),MMUT(-1.72),MYCN(+3.19),NABP2(-1.89),NDST1(+1.6),NEDD4L(+1.95),NOS3(-5.35),NPAS3(+1.77),NRXN1(+7.42),PLAGL1(+1.91),PLAU(-…
Connective Tissue Disorders,Organismal Injury and Abnormalities,Skeletal and Muscular Disorders	Non-traumatic arthropathy	5.31e-11		-0.749	183	128	55	ADAM12(+3.56),ADAM9(-1.69),ADAMTS10(+3.13),ADAMTS14(+3.43),ADAMTS17(+4.3),ADAMTS19(+3.87),ADAMTS20(+2.39),ADAMTS5(+2.45),ADCY8(+3.77),ADIPOR1(-1.58),AGER(-1.91),AIF1(-4.76),ALDOA(-1.51),ALOX15(-2.39),ANG(-3.03),ARAP2(+1.94),ARF1(-1.49),ARHGAP33(+2.31),ARRB1(+2.62),ASPN(+14.68),ATP1B1(-2.11),ATP8A1(+3.33),BIRC5(+2.19),BMP1(+1.86),BMP4(+1.85),BMP5(+3.06),C4A/C4B(+2.69),C6orf62(-1.69),C9orf72(-2.4),…
Connective Tissue Development and Function,Organismal Development,Skeletal and Muscular System Development and Function,Tissue Development	Morphology of skull	5.33e-11			60	52	8	ANKH(+1.95),ARSB(+1.72),BMP1(+1.86),BMP4(+1.85),BMPER(+5.67),CCN3(+4.98),CDO1(-1.69),CDON(+1.56),COL2A1(+1.9),CREB3L2(+1.81),CTNNBIP1(+1.87),DDR1(-1.74),DDR2(+4.69),DLX2(+2.73),DNMT3B(+2.47),EDNRA(+9.03),EGFR(+2.45),FGFR3(-2.34),FGFRL1(-1.69),FOS(+2.02),FOXF2(+7.89),FOXO1(+2.33),GAS1(+3.38),INHBA(+3.11),KLF2(+3.29),LEF1(+2.55),LMX1B(+7.02),LTBP3(+2.15),MMP16(+2.82),MMP2(+2.64),MSI1(-1.68),MSX1(+6…
Cancer,Organismal Injury and Abnormalities	Neoplasia of tumor cell lines	5.74e-11		1.816	97	79	18	ABLIM1(+1.7),ADAM12(+3.56),AFAP1-AS1(+1.93),ALCAM(+3.09),ALDH1A3(+3.21),ANG(-3.03),AXIN2(+3.19),AXL(-1.57),BBC3(-1.77),BMP4(+1.85),BRCA1(+1.77),CCL2(+2.16),CCN4(+3.55),CD44(+3.93),CDC25A(+1.75),CDH1(+3.1),CDKN1A(-2.32),CRNDE(+3.25),CXCR4(+2.78),DDR2(+4.69),DLC1(+2.74),DLX2(+2.73),DPYSL4(+1.81),EGFR(+2.45),EPAS1(+2.73),EPHA1(+2.49),EPHA2(-1.74),EPHB6(+2.0),ESRP1(+3.38),ETS1(+1.84),FABP5(+2.52),FBL…
Skeletal and Muscular Disorders	Hand deformity	6e-11			29	29	0	ADAMTS14(+3.43),ADAMTS19(+3.87),ADAMTS20(+2.39),ADAMTS5(+2.45),ADAMTS8(+1.83),COL13A1(+2.88),COL14A1(+4.09),COL15A1(+2.47),COL16A1(+5.19),COL17A1(+6.4),COL1A1(+3.04),COL21A1(+5.93),COL23A1(+2.5),COL25A1(+3.53),COL27A1(+1.86),COL2A1(+1.9),COL3A1(+8.18),COL5A1(+2.19),COL6A2(+1.72),COL8A2(+5.86),COL9A1(+1.52),COL9A2(+2.15),COL9A3(+4.01),HPGD(+5.34),MMP16(+2.82),MMP17(+2.55),MMP19(+2.28),MMP2(+2.64),…
Cardiovascular Disease	Occlusion of blood vessel	6.56e-11		0.668	119	83	36	ADARB2(+3.39),AGER(-1.91),AHR(+3.68),ALOX15(-2.39),ANKRD29(+2.61),ASTN2(+1.88),BIRC5(+2.19),BMPR1B(-2.97),CA4(-6.57),CACNA1C(+3.21),CACNA1E(+4.04),CACNA2D1(+3.79),CBS/CBSL(+2.37),CCL2(+2.16),CCN3(+4.98),CD44(+3.93),CDKN1A(-2.32),CNR1(+8.01),CNTNAP5(+13.56),CORO2A(+2.44),CPS1(-2.96),CSMD1(+6.16),CSMD2(+3.8),CTSV(+2.48),DDR1(-1.74),DHFR(+1.79),DISP1(+1.61),DOCK4(+2.36),DOCK9(+1.6),ENTPD1(-1.58),F5(…
Cancer,Hematological Disease,Immunological Disease,Organismal Injury and Abnormalities	B cell cancer	6.56e-11		0.508	216	166	50	ABCC9(+2.43),ADAM9(-1.69),ADAMTSL3(+10.28),ADGRB1(+2.1),AHR(+3.68),ALK(+3.89),ANKRD50(+1.66),ANXA2(+1.65),APBA1(+2.1),APBA3(-1.67),ASAP2(+1.65),ATP10A(+2.87),BACH2(+1.83),BBC3(-1.77),BCHE(+2.65),BCL11A(+3.04),BCL11B(+4.28),BICC1(+4.24),BMF(+1.59),BNC2(+3.43),BRCA1(+1.77),BRSK1(-1.69),BSCL2(-1.53),BUB1B(+1.96),CALD1(+1.68),CCL2(+2.16),CCNB1(+1.58),CD101(+2.64),CD44(+3.93),CDC42EP3(+2.0),CDCA2(+1.8…
Auditory and Vestibular System Development and Function,Embryonic Development,Organ Development,Organismal Development,Tissue Development	Development of inner ear	6.66e-11			44	32	12	ALDH1A3(+3.21),ATP8A2(+2.14),BMPER(+5.67),CDH23(-1.49),CEBPD(+2.36),COL2A1(+1.9),CXCL14(+1.96),DLL1(-2.54),FGFR1(+1.86),FGFR3(-2.34),FRZB(+4.89),HES5(-2.3),HEY1(+2.26),HLA-DMA(-2.78),IFI16(+2.82),INSIG1(-2.21),INSIG2(-2.22),LGR5(-3.4),MAFB(+3.39),MYCN(+3.19),MYO15A(-2.44),MYO3A(+1.99),NOTCH1(-1.48),NR2F1(-5.84),NTF3(+3.71),NTN1(+2.48),PLPPR4(+2.57),PRRX1(+8.65),ROR1(+2.54),ROR2(+2.36),SIX1(+10.7)…
Connective Tissue Disorders,Inflammatory Disease,Inflammatory Response,Organismal Injury and Abnormalities,Skeletal and Muscular Disorders	Osteoarthritis	7.11e-11		-1.287	63	52	11	ADAM12(+3.56),ADAM9(-1.69),ADAMTS10(+3.13),ADAMTS14(+3.43),ADAMTS17(+4.3),ADAMTS19(+3.87),ADAMTS20(+2.39),ADAMTS5(+2.45),ALOX15(-2.39),ASPN(+14.68),BMP4(+1.85),BMP5(+3.06),CACNA1B(-1.83),CACNA1C(+3.21),CACNA2D1(+3.79),CACNA2D3(+5.28),CACNA2D4(+4.85),CCL2(+2.16),CEMIP(+3.39),COL2A1(+1.9),COL9A1(+1.52),EPAS1(+2.73),EPOR(-2.66),FDFT1(-2.01),FDPS(-1.71),FRZB(+4.89),GABRA3(+2.43),GABRB3(+4.19),GABRE(+…
Cancer,Organismal Injury and Abnormalities	Papillary adenocarcinoma	7.53e-11			84	62	22	ABCA8(+3.17),ACP5(-2.76),ADGRD1(-2.98),ATP1B1(-2.11),BRCA1(+1.77),BUB1B(+1.96),C3orf52(+2.26),C4A/C4B(+2.69),CALB2(+6.38),CBX7(-1.96),CD44(+3.93),CDC42EP3(+2.0),CDC6(+2.07),CDH1(+3.1),CDKN1A(-2.32),CENPF(+1.71),CENPU(+2.42),CFH(+16.28),CHRNA5(+2.29),COL15A1(+2.47),CRABP1(-3.88),CTNNAL1(+1.6),CUBN(+1.91),CXCR4(+2.78),DAB2(+1.76),DCN(+24.15),DIS3(-1.72),EGFR(+2.45),EPHB6(+2.0),ETS1(+1.84),FAM111B(+…
Embryonic Development,Organismal Development	Growth of embryo	7.66e-11	Increased	3.317	112	84	28	ADCYAP1(+4.25),AHR(+3.68),ARX(-5.71),ASCL1(+5.3),ASPM(+2.11),BMP4(+1.85),BMPR1B(-2.97),BMPR2(+2.38),BRCA1(+1.77),CD44(+3.93),CDK11A(-1.68),CDK6(+2.2),CDKN1A(-2.32),CDON(+1.56),CHAF1A(+2.72),CNR1(+8.01),CTNNBIP1(+1.87),CUL7(-1.62),CUX2(+1.74),CXCL14(+1.96),DCT(+10.71),DLL1(-2.54),E2F1(+2.7),E2F3(+1.56),EGFR(+2.45),EMX2(-1.97),EOMES(+2.75),EPAS1(+2.73),EPHB1(+2.81),ERBB3(+2.29),ESPL1(+2.25),FGFR1(+…
Cardiovascular Disease,Organismal Injury and Abnormalities	Occlusion of artery	8.23e-11		0.885	117	82	35	ADARB2(+3.39),AGER(-1.91),AHR(+3.68),ALOX15(-2.39),ANKRD29(+2.61),ASTN2(+1.88),BIRC5(+2.19),BMPR1B(-2.97),CA4(-6.57),CACNA1C(+3.21),CACNA1E(+4.04),CACNA2D1(+3.79),CBS/CBSL(+2.37),CCL2(+2.16),CD44(+3.93),CDKN1A(-2.32),CNR1(+8.01),CNTNAP5(+13.56),CORO2A(+2.44),CSMD1(+6.16),CSMD2(+3.8),CTSV(+2.48),DDR1(-1.74),DHFR(+1.79),DISP1(+1.61),DOCK4(+2.36),DOCK9(+1.6),ENTPD1(-1.58),F5(+4.74),FABP5(+2.52),FADS…
Psychological Disorders	Mood Disorders	8.67e-11		1.982	101	83	18	A2M(+4.05),ABLIM1(+1.7),ADAMTS14(+3.43),ARHGAP33(+2.31),ATP1A3(+2.61),ATP1B1(-2.11),BCHE(+2.65),CA10(+5.2),CA4(-6.57),CACNA1B(-1.83),CACNA1C(+3.21),CACNA1F(-3.83),CACNA1G(+2.29),CACNA2D1(+3.79),CACNA2D3(+5.28),CACNA2D4(+4.85),CCL2(+2.16),CDC25B(+2.16),CHGA(+14.1),CHRM2(+1.92),CHRM3(+2.33),CHRNA3(+3.24),CHRNA5(+2.29),CHRNA7(+1.94),CHRNB2(+2.52),CHST11(+1.74),CYP1A1(+5.71),DHFR(+1.79),DIABLO(-1.53)…
Cell Death and Survival	Cell viability	9.06e-11	Increased	4.121	277	198	79	ADCY1(+3.35),ADCYAP1(+4.25),ADCYAP1R1(+5.81),ADIPOR1(-1.58),AGER(-1.91),AHR(+3.68),AK5(+2.51),ALK(+3.89),AMIGO2(+3.9),ANGPT1(+5.6),ANKRD1(-2.65),ANKS1B(+2.02),APEX1(+1.71),APLF(-2.7),APPL2(+1.69),ARRB1(+2.62),ASS1(+2.45),ATF5(+2.66),AURKAIP1(-1.75),AXL(-1.57),BBC3(-1.77),BCL11B(+4.28),BIRC5(+2.19),BMP4(+1.85),BMP5(+3.06),BNIP3(-1.92),BRCA1(+1.77),BRIP1(+2.46),BTRC(+1.67),BUB1B(+1.96),CALB2(+6.38)…
Connective Tissue Disorders,Organismal Injury and Abnormalities,Skeletal and Muscular Disorders	Dupuytren contracture	9.08e-11			27	27	0	ADAMTS14(+3.43),ADAMTS19(+3.87),ADAMTS20(+2.39),ADAMTS5(+2.45),ADAMTS8(+1.83),COL13A1(+2.88),COL14A1(+4.09),COL15A1(+2.47),COL16A1(+5.19),COL17A1(+6.4),COL1A1(+3.04),COL21A1(+5.93),COL23A1(+2.5),COL25A1(+3.53),COL27A1(+1.86),COL2A1(+1.9),COL3A1(+8.18),COL5A1(+2.19),COL6A2(+1.72),COL8A2(+5.86),COL9A1(+1.52),COL9A2(+2.15),COL9A3(+4.01),MMP16(+2.82),MMP17(+2.55),MMP19(+2.28),MMP2(+2.64)
Respiratory System Development and Function	Morphology of respiratory tract	9.81e-11			58	42	16	ABCA12(+2.54),ALDH1A3(+3.21),ANO1(+5.01),ARRB1(+2.62),ARSB(+1.72),ASCL1(+5.3),BMP4(+1.85),BMPER(+5.67),BMPR2(+2.38),CDKN1A(-2.32),CDO1(-1.69),CDON(+1.56),CHL1(+2.12),COL2A1(+1.9),CTNNBIP1(+1.87),DDR2(+4.69),DHCR7(-1.88),EGFR(+2.45),EMX2(-1.97),FBLN1(+4.81),FBN1(+1.56),FEZF1(-11.57),FGFR3(-2.34),FOXO1(+2.33),HEY2(+4.4),INPP5D(-3.53),INSM1(+4.66),ITGB4(+1.99),LIPA(-2.07),LOX(+1.9),LOXL1(+1.92),LPL(…
Neurological Disease,Organismal Injury and Abnormalities,Psychological Disorders	Frontotemporal lobar degeneration or amyotrophic lateral sclerosis	1.08e-10			64	48	16	ABCA8(+3.17),ACTN3(-4.12),ANG(-3.03),C9orf72(-2.4),CALM1 (includes others)(+1.49),CDC42EP3(+2.0),CDKN1A(-2.32),CHCHD10(-1.98),CHGB(+5.21),CHRM2(+1.92),CHRM3(+2.33),COL1A1(+3.04),COL3A1(+8.18),DAB1(+2.05),DRD4(-3.01),ENO3(-3.41),ETS2(+2.51),FBLN1(+4.81),FGFR3(-2.34),FOXF2(+7.89),FOXO1(+2.33),FUCA1(-2.68),FUS(+1.71),GABRA3(+2.43),GABRB3(+4.19),GABRE(+2.41),GABRP(+8.82),GRIA2(+6.74),GRIA4(+2.25),GRI…
Connective Tissue Development and Function,Skeletal and Muscular System Development and Function,Tissue Development	Size of bone	1.12e-10			75	56	19	AGER(-1.91),AHR(+3.68),ANKH(+1.95),ARSB(+1.72),BMP4(+1.85),BMPR1B(-2.97),BTG3(-2.04),CAPN1(+1.7),CCN3(+4.98),CD44(+3.93),CNR1(+8.01),COL1A1(+3.04),COL2A1(+1.9),CREB3L2(+1.81),CTSV(+2.48),CYP1A1(+5.71),CYP1B1(+2.61),CYP27B1(-2.51),DCN(+24.15),DDR2(+4.69),FBLIM1(+2.57),FGFR3(-2.34),FGFRL1(-1.69),FHL2(+2.13),FNDC5(+1.74),FOS(+2.02),FOXO1(+2.33),GAS1(+3.38),GREM1(-1.83),HEY2(+4.4),IGFBP5(+2.03),IL1R1…
Nervous System Development and Function,Neurological Disease,Organ Morphology,Organismal Development,Organismal Injury and Abnormalities	Abnormal morphology of forebrain	1.15e-10			60	44	16	ADCY1(+3.35),ADCY3(+1.72),ALK(+3.89),ARX(-5.71),ASCL1(+5.3),ASPM(+2.11),ATP1B2(-1.79),AXL(-1.57),BHLHE22(+5.15),CDK5R1(+2.97),CDON(+1.56),CELSR2(-1.92),CHL1(+2.12),CHRNB2(+2.52),COL2A1(+1.9),DAB1(+2.05),DCLK1(+4.51),DISP1(+1.61),EBF1(+17.28),EBF2(+3.88),EGFR(+2.45),EMX1(+3.76),EMX2(-1.97),ERBB3(+2.29),FEZF1(-11.57),FEZF2(-3.35),GM2A(-1.66),HAP1(-2.4),HES5(-2.3),HEY1(+2.26),HEY2(+4.4),IFT172(-1.52…
Cardiovascular Disease,Organismal Injury and Abnormalities	Abnormality of heart ventricle	1.17e-10		-0.931	96	69	27	ABCC8(+4.12),ABCC9(+2.43),ADAM12(+3.56),ADAM9(-1.69),ANK2(+2.8),ANKRD1(-2.65),ARSB(+1.72),BIRC5(+2.19),BMPR2(+2.38),BNIP3(-1.92),C1QTNF1(+4.31),CA4(-6.57),CACNA1C(+3.21),CACNA2D1(+3.79),CAPN1(+1.7),CCN3(+4.98),CDK6(+2.2),CDKN1A(-2.32),CHGA(+14.1),CTSV(+2.48),CXCR4(+2.78),DCHS1(+1.75),DIO3(+6.08),DOCK1(+1.85),E2F1(+2.7),ECE2(-2.4),EDNRA(+9.03),EGFR(+2.45),EPAS1(+2.73),EPOR(-2.66),ERBB3(+2.29),FBLN…
Nutritional Disease	Weight gain	1.29e-10		0.846	83	57	26	ABCC9(+2.43),ACOT13(-1.8),ADCYAP1(+4.25),ADIPOR1(-1.58),AHR(+3.68),ALK(+3.89),ANO1(+5.01),ARX(-5.71),BRINP1(+3.57),C1QTNF1(+4.31),CA4(-6.57),CACNA1E(+4.04),CACNA1G(+2.29),CAMK2B(+3.05),CCDC80(+1.98),CDKN1A(-2.32),CDO1(-1.69),CEP290(-1.67),CHRM2(+1.92),CHRM3(+2.33),CNR1(+8.01),CYP1A1(+5.71),CYP1B1(+2.61),CYP27B1(-2.51),DRD4(-3.01),E2F1(+2.7),E2F3(+1.56),FOS(+2.02),FOXO1(+2.33),GABRA3(+2.43),GABRB3…
Cancer,Organismal Injury and Abnormalities	Adenoma	1.3e-10		-1.989	99	80	19	ADGRD1(-2.98),AHR(+3.68),ALDOC(-3.65),ALOX15(-2.39),ANXA2(+1.65),ASS1(+2.45),AXIN2(+3.19),BACE2(+1.84),BBC3(-1.77),BOK(+2.12),BRINP3(+6.4),BTRC(+1.67),BUB1B(+1.96),CAMK2B(+3.05),CBX7(-1.96),CCDC80(+1.98),CCNB1(+1.58),CD44(+3.93),CDH1(+3.1),CDH23(-1.49),CEBPD(+2.36),CEMIP(+3.39),CFH(+16.28),CHRM3(+2.33),CNR1(+8.01),CRNDE(+3.25),CYP1B1(+2.61),DCN(+24.15),DHFR(+1.79),DLL1(-2.54),DNMT3B(+2.47),DPYSL4…
Renal and Urological System Development and Function	Morphology of urinary system	1.33e-10			84	56	28	AGER(-1.91),AHR(+3.68),AQP1(+2.14),ARX(-5.71),BICC1(+4.24),BMP4(+1.85),BMPER(+5.67),BSCL2(-1.53),C4A/C4B(+2.69),CACNA2D1(+3.79),CDKN1A(-2.32),CFH(+16.28),CFI(+2.44),CHRM2(+1.92),CHRM3(+2.33),CHRNA3(+3.24),CHRNB2(+2.52),CTNNBIP1(+1.87),CXCL14(+1.96),CYP24A1(+8.89),DACT1(+2.82),DCHS1(+1.75),DCN(+24.15),DDR1(-1.74),DHCR7(-1.88),E2F2(+4.11),EGFR(+2.45),EHD4(-2.45),EMX2(-1.97),ETV4(+2.16),FADS2(-1.92)…
Cellular Development	Differentiation of tumor cell lines	1.36e-10	Increased	2.448	90	75	15	ADCYAP1(+4.25),AHR(+3.68),ALK(+3.89),ANXA2(+1.65),ASCL1(+5.3),B4GALNT1(+3.19),BMP4(+1.85),BMPR2(+2.38),CCN3(+4.98),CDK5R1(+2.97),CDK6(+2.2),CDKN1A(-2.32),CEBPD(+2.36),DAB2(+1.76),DDIT3(-2.04),DDR1(-1.74),E2F1(+2.7),EGFR(+2.45),ELAVL2(+5.16),ELAVL3(+2.83),EPOR(-2.66),ETS2(+2.51),ETV4(+2.16),ETV6(+1.96),FGFR1(+1.86),FN1(+3.0),FOS(+2.02),FOXP1(+2.33),GAREM2(+2.1),GCNT1(-2.78),GNAO1(+2.29),GPR12(+4.4…
Embryonic Development,Nervous System Development and Function,Organ Development,Organismal Development,Tissue Development	Development of cerebral cortex	1.39e-10	Increased	2.407	49	40	9	ADCYAP1R1(+5.81),ADGRB1(+2.1),ALK(+3.89),ASCL1(+5.3),ASPM(+2.11),CDK5R1(+2.97),CDK6(+2.2),CDON(+1.56),CHL1(+2.12),CNR1(+8.01),COL3A1(+8.18),DAB1(+2.05),DCX(+1.97),DLL1(-2.54),DLX2(+2.73),EMX1(+3.76),EMX2(-1.97),EPHA5(+3.46),FEZF2(-3.35),FGFR1(+1.86),FGFR3(-2.34),FOXC1(+7.92),FOXP2(+5.5),GAP43(+4.63),GRM5(+3.07),KCNA1(+2.6),KIRREL3(+3.83),LEF1(+2.55),LHX5(-1.77),MAPT(+3.09),MFSD2A(-6.79),NDEL1(-1.…
Cancer,Cellular Development,Cellular Growth and Proliferation,Organismal Injury and Abnormalities,Tumor Morphology	Proliferation of tumor cells	1.45e-10		1.412	107	79	28	ABCC4(-2.19),ADCYAP1R1(+5.81),ALK(+3.89),ANK2(+2.8),ANXA2(+1.65),APCDD1(+15.97),BAMBI(+1.63),BIRC5(+2.19),BMP4(+1.85),BMPR2(+2.38),BRCA1(+1.77),CCN3(+4.98),CD44(+3.93),CDH1(+3.1),CDK6(+2.2),CDKN1A(-2.32),CTSV(+2.48),CXCR4(+2.78),DACT2(+5.62),DCN(+24.15),DDIT3(-2.04),DIRAS1(+1.91),DOCK4(+2.36),EGFR(+2.45),EIF2AK3(-2.83),EMX2(-1.97),EPHA2(-1.74),ERBB3(+2.29),FGF1(+2.78),FGFR1(+1.86),FGFR3(-2.34),FH…
Cellular Development,Embryonic Development,Organismal Development,Tissue Development	Differentiation of embryonic tissue	1.48e-10	Increased	2.098	70	58	12	ANGPT1(+5.6),ASCL1(+5.3),BCHE(+2.65),BMP4(+1.85),BRCA1(+1.77),CDH1(+3.1),CUL7(-1.62),DAB2(+1.76),EOMES(+2.75),ERBB3(+2.29),ETS2(+2.51),FBN1(+1.56),FGFR1(+1.86),FN1(+3.0),FOSL2(+1.73),FOXC1(+7.92),FOXO1(+2.33),GALNS(+1.72),HES5(-2.3),HEY2(+4.4),HMGA2(+2.05),INHBA(+3.11),ISL1(+4.84),KDR(+2.05),KITLG(+2.68),LAMA2(+4.8),LEF1(+2.55),LHX5(-1.77),MAP3K5(+3.69),MDFI(+2.04),MEIS1(-2.08),MEOX1(+2.78),METRN…
Skeletal and Muscular System Development and Function	Morphology of skeleton	1.49e-10			78	56	22	ARSB(+1.72),BMP4(+1.85),BMPER(+5.67),BMPR1B(-2.97),CCN3(+4.98),CDK20(-1.81),CDKN1A(-2.32),CDO1(-1.69),CHPF(-1.59),COL27A1(+1.86),COL2A1(+1.9),COL9A1(+1.52),CRISPLD2(+7.46),CYP1A1(+5.71),CYP1B1(+2.61),CYP27B1(-2.51),CYP51A1(-1.69),DACT1(+2.82),DCHS1(+1.75),DLL1(-2.54),DLL3(+3.98),ECE2(-2.4),EDNRA(+9.03),EIF2AK3(-2.83),FBN1(+1.56),FGFR1(+1.86),FGFR3(-2.34),FGFRL1(-1.69),FOSL2(+1.73),FRZB(+4.89),GAS…
Cancer,Gastrointestinal Disease,Organismal Injury and Abnormalities	Rectum carcinoma	1.52e-10			117	90	27	ABCA12(+2.54),ADCY2(-1.72),AMER2(+6.05),AMIGO2(+3.9),ANKRD26(-1.77),ATP8A1(+3.33),ATP9A(+1.56),AXIN2(+3.19),BUB1B(+1.96),C11orf87(+3.68),CACNA1B(-1.83),CALD1(+1.68),CCDC102B(-4.43),CCDC141(+4.04),CDC6(+2.07),CDH23(-1.49),CELSR2(-1.92),CENPF(+1.71),CEP290(-1.67),CFI(+2.44),CNGA3(+5.89),CNTNAP4(+2.49),COG3(-1.58),CPAMD8(+1.7),CSMD1(+6.16),DCLK1(+4.51),DCN(+24.15),DDR2(+4.69),DDX60L(+2.17),DIAPH3(+1…
Cancer,Endocrine System Disorders,Organismal Injury and Abnormalities,Reproductive System Disease	Ovarian endometrioid carcinoma	1.58e-10			183	140	43	ABCA12(+2.54),ABCC4(-2.19),ADAMTS10(+3.13),ADAMTS20(+2.39),ADCY2(-1.72),ADCYAP1R1(+5.81),ADD2(+2.03),AFF3(+1.85),AIF1(-4.76),AKAP6(+1.88),AMOTL1(+1.8),ANKRD24(-3.32),AOPEP(+1.65),ARHGEF40(+1.86),ASPM(+2.11),ATP8A1(+3.33),BRCA1(+1.77),BRINP3(+6.4),BRIP1(+2.46),C1orf61(+7.51),CACNA1B(-1.83),CACNA1E(+4.04),CACNA2D1(+3.79),CACNA2D3(+5.28),CADPS(+1.95),CCN4(+3.55),CD109(+2.35),CDH18(+2.06),CDO1(-1.69)…
Nervous System Development and Function,Neurological Disease,Organ Morphology,Organismal Development,Organismal Injury and Abnormalities	Abnormal morphology of cerebral cortex	1.74e-10			54	40	14	ADCY1(+3.35),ASPM(+2.11),AXL(-1.57),BRINP1(+3.57),BRSK1(-1.69),BRSK2(+2.27),CDK5R1(+2.97),CDON(+1.56),CHL1(+2.12),CHRNA7(+1.94),CHRNB2(+2.52),CRMP1(+1.96),CTSV(+2.48),CUX2(+1.74),CXCR4(+2.78),DAB1(+2.05),EGFR(+2.45),EMX1(+3.76),EMX2(-1.97),ERBB3(+2.29),ESCO2(+2.34),FEZF1(-11.57),FEZF2(-3.35),FGF1(+2.78),GAP43(+4.63),GM2A(-1.66),GRIA2(+6.74),GRIK2(+4.11),HAP1(-2.4),KALRN(+2.8),KCNA1(+2.6),LDLR(-1.…
Cancer,Endocrine System Disorders,Organismal Injury and Abnormalities,Reproductive System Disease	Ovarian serous tumor	1.88e-10			152	116	36	ABCA8(+3.17),ACP5(-2.76),ADAMTS19(+3.87),ADAMTSL3(+10.28),ADCY1(+3.35),ADCY2(-1.72),AKAP2(+2.04),AKAP6(+1.88),ALKBH7(-1.81),AMOTL1(+1.8),ANGPT1(+5.6),ANKRD24(-3.32),ANKRD50(+1.66),APCDD1(+15.97),ATP8A2(+2.14),AXIN2(+3.19),BRCA1(+1.77),BRIP1(+2.46),BSN(+2.15),C4A/C4B(+2.69),CALB2(+6.38),CAMK2B(+3.05),CCDC151(-2.08),CDH1(+3.1),CDH23(-1.49),CDHR1(+2.89),CDK20(-1.81),CDKN1A(-2.32),CFH(+16.28),CHRNA5(…
Organismal Development,Organismal Injury and Abnormalities	Abnormal morphology of thoracic cavity	1.99e-10			190	140	50	ABCA12(+2.54),ABCC4(-2.19),ABCC8(+4.12),ABCC9(+2.43),ACADL(+2.1),ADAM12(+3.56),ADAM9(-1.69),ADGRD1(-2.98),ADGRG1(-1.62),AHR(+3.68),ALOX15(-2.39),ANGPT1(+5.6),ANK2(+2.8),ANKRD1(-2.65),ARRB1(+2.62),ARSB(+1.72),BCL11A(+3.04),BCL11B(+4.28),BIRC5(+2.19),BMP4(+1.85),BMPR2(+2.38),BNIP3(-1.92),BRCA1(+1.77),BSCL2(-1.53),CACNA1C(+3.21),CACNA1F(-3.83),CACNA2D1(+3.79),CAPN1(+1.7),CCN3(+4.98),CDC42EP3(+2.0),C…
Cardiovascular Disease,Organismal Injury and Abnormalities,Respiratory Disease	Pulmonary vascular disease	2.06e-10		1.452	47	35	12	ANGPT1(+5.6),ANKRD1(-2.65),BIRC5(+2.19),BMPR1B(-2.97),BMPR2(+2.38),CA4(-6.57),CACNA1B(-1.83),CACNA1C(+3.21),CHRNA3(+3.24),CHRNA5(+2.29),CHRNA7(+1.94),CHRNB2(+2.52),CPS1(-2.96),CXCR4(+2.78),DDR1(-1.74),DDR2(+4.69),EDNRA(+9.03),EDNRB(-4.04),EPAS1(+2.73),FOSL2(+1.73),GABRA3(+2.43),GABRB3(+4.19),GABRE(+2.41),GABRP(+8.82),GLRA1(+5.8),GRIA1(+1.96),KCNA5(+3.67),KCNK3(+5.6),KDR(+2.05),NOS3(-5.35),NPPB(-2…
Connective Tissue Disorders,Inflammatory Disease,Inflammatory Response,Neurological Disease,Organismal Injury and Abnormalities,Skeletal and Muscular Disorders	Cervical spondylotic myelopathy	2.2e-10			15	15	0	CACNA2D1(+3.79),CACNA2D3(+5.28),CACNA2D4(+4.85),SCN10A(+6.15),SCN1A(+5.65),SCN2A(+6.01),SCN2B(+3.1),SCN3A(+4.41),SCN3B(+2.4),SCN4B(+2.66),SCN7A(+8.07),SCN8A(+2.12),SCN9A(+11.17),SLC1A2(+5.56),SLC1A3(+5.03)
Cancer,Gastrointestinal Disease,Organismal Injury and Abnormalities	Rectal adenocarcinoma	2.21e-10			116	89	27	ABCA12(+2.54),ADCY2(-1.72),AMER2(+6.05),AMIGO2(+3.9),ANKRD26(-1.77),ATP8A1(+3.33),ATP9A(+1.56),AXIN2(+3.19),BUB1B(+1.96),C11orf87(+3.68),CACNA1B(-1.83),CALD1(+1.68),CCDC102B(-4.43),CCDC141(+4.04),CDC6(+2.07),CDH23(-1.49),CELSR2(-1.92),CENPF(+1.71),CEP290(-1.67),CFI(+2.44),CNGA3(+5.89),CNTNAP4(+2.49),COG3(-1.58),CPAMD8(+1.7),CSMD1(+6.16),DCLK1(+4.51),DCN(+24.15),DDR2(+4.69),DDX60L(+2.17),DIAPH3(+1…
Developmental Disorder	Hypoplasia of organ	2.26e-10	Decreased	-4.427	108	77	31	ABCC4(-2.19),AHR(+3.68),ALDH1A3(+3.21),ALK(+3.89),ARRB1(+2.62),ARX(-5.71),BACH2(+1.83),BCL11A(+3.04),BCL11B(+4.28),BHLHE22(+5.15),BMP4(+1.85),BMPER(+5.67),BTRC(+1.67),CDK6(+2.2),CDKN1C(-1.78),COL2A1(+1.9),CTNNBIP1(+1.87),CYP27B1(-2.51),CYP51A1(-1.69),DACT1(+2.82),DCLK1(+4.51),DNASE2(-1.68),E2F1(+2.7),E2F3(+1.56),EBF2(+3.88),ECE2(-2.4),EDNRA(+9.03),EGFR(+2.45),EMX1(+3.76),EMX2(-1.97),EPOR(-2.66),E…
Cardiovascular Disease,Cardiovascular System Development and Function	Abnormal morphology of cardiovascular system	2.32e-10			178	130	48	ABCC4(-2.19),ABCC8(+4.12),ABCC9(+2.43),ACADL(+2.1),ADAM12(+3.56),ADAM9(-1.69),ADGRD1(-2.98),ADGRG1(-1.62),AHR(+3.68),ALOX15(-2.39),ANGPT1(+5.6),ANK2(+2.8),ANKRD1(-2.65),ARSB(+1.72),AXL(-1.57),BIRC5(+2.19),BMP1(+1.86),BMP4(+1.85),BMPR2(+2.38),BNIP3(-1.92),BSCL2(-1.53),CACNA1C(+3.21),CACNA1F(-3.83),CACNA2D1(+3.79),CAPN1(+1.7),CBS/CBSL(+2.37),CCN3(+4.98),CD44(+3.93),CDC42EP3(+2.0),CDK5R1(+2.97),CDK6…
Respiratory System Development and Function	Development of respiratory tract	3.06e-10		0.152	35	31	4	ABCA12(+2.54),ADCY3(+1.72),AHR(+3.68),ALDH1A3(+3.21),ANO1(+5.01),BMP4(+1.85),BMP5(+3.06),BMPR2(+2.38),EBF2(+3.88),EBF3(+4.04),FBLN1(+4.81),FGFR3(-2.34),GAS1(+3.38),GNAO1(+2.29),HSF4(-2.58),HYDIN(+1.98),IGFBP5(+2.03),INHBB(+5.09),ISL1(+4.84),KDR(+2.05),MAP2K1(-1.55),MYOCD(+2.22),PKDCC(+3.41),RDH10(+5.3),SIX1(+10.7),SIX4(+1.59),SKI(+1.66),SLC7A11(+3.3),SOX2(-2.72),SOX9(+1.56),STRA6(+2.0),TBX1(+5.18…
Tissue Development	Development of epithelial tissue	3.11e-10		0.957	121	92	29	ADAMTS8(+1.83),ADGRB1(+2.1),AGER(-1.91),AHR(+3.68),ANG(-3.03),ANGPT1(+5.6),ANXA2(+1.65),ATOH8(+2.32),AXL(-1.57),BCL11B(+4.28),BMP4(+1.85),BMPER(+5.67),BMPR2(+2.38),CCL2(+2.16),CD44(+3.93),CDH1(+3.1),CDKN1A(-2.32),CHGA(+14.1),CLDN3(-2.47),CLIC4(+1.64),COL1A1(+3.04),COL8A2(+5.86),CXCR4(+2.78),DAB2(+1.76),DACT2(+5.62),EDNRB(-4.04),EGFL6(+1.62),EGFR(+2.45),EPHA2(-1.74),EPOR(-2.66),FGF1(+2.78),FGFR1(+…
Cellular Development,Cellular Growth and Proliferation,Connective Tissue Development and Function,Tissue Development	Development of connective tissue cells	3.14e-10	Increased	2.641	68	54	14	ADAM12(+3.56),AHR(+3.68),ANXA2(+1.65),ASCL1(+5.3),AXIN2(+3.19),BCL11B(+4.28),BIRC5(+2.19),BMP4(+1.85),BMPR2(+2.38),CALD1(+1.68),CCL2(+2.16),CD44(+3.93),CDKN1A(-2.32),CHST11(+1.74),CYP1A1(+5.71),CYP1B1(+2.61),EBF1(+17.28),EGFR(+2.45),EIF2AK2(+1.57),EIF2AK3(-2.83),FGFR3(-2.34),FHL2(+2.13),FNDC5(+1.74),FOS(+2.02),FOXO1(+2.33),FRZB(+4.89),FZD8(+3.03),HEY1(+2.26),ICAM1(-2.26),IFT20(-1.73),INHBA(+3.11)…
Cardiovascular Disease,Organismal Injury and Abnormalities	Disorder of coronary artery	3.18e-10		-0.651	74	57	17	ABCC8(+4.12),ABCC9(+2.43),ADARB2(+3.39),AHR(+3.68),ANKRD29(+2.61),ASTN2(+1.88),BMPR1B(-2.97),CA4(-6.57),CACNA1C(+3.21),CACNA1E(+4.04),CACNA1F(-3.83),CACNA2D1(+3.79),CCL2(+2.16),CNR1(+8.01),CNTNAP5(+13.56),CORO2A(+2.44),CSMD1(+6.16),CSMD2(+3.8),DISP1(+1.61),DOCK4(+2.36),DOCK9(+1.6),FADS1(-1.71),FOS(+2.02),FUT9(+2.84),GAA(-1.56),GABRA3(+2.43),GABRB3(+4.19),GABRE(+2.41),GABRP(+8.82),GFOD1(+2.79),GLR…
Connective Tissue Development and Function,Skeletal and Muscular System Development and Function,Tissue Development	Cartilage development	3.29e-10		1.474	46	36	10	ARSB(+1.72),AXIN2(+3.19),B4GALNT1(+3.19),BMP1(+1.86),BMP4(+1.85),BMPER(+5.67),BMPR1B(-2.97),BMPR2(+2.38),CCN3(+4.98),CHPF(-1.59),CHST11(+1.74),CHSY3(+3.28),COL2A1(+1.9),COL9A1(+1.52),CREB3L2(+1.81),DCN(+24.15),DDRGK1(-2.34),DLL3(+3.98),DLX2(+2.73),DSEL(+1.84),EIF2AK3(-2.83),FGFR3(-2.34),FRZB(+4.89),HES5(-2.3),LMX1B(+7.02),MATN3(+5.14),MSX1(+6.43),NABP2(-1.89),NCAN(+2.56),PER1(-2.15),PRRX1(+8.65),…
Cell Morphology,Cellular Movement,Nervous System Development and Function	Innervation of neurons	3.47e-10		0.199	30	24	6	ADCY3(+1.72),BMP4(+1.85),CACNA1F(-3.83),CBLN1(+5.11),EGFR(+2.45),FGFR3(-2.34),FRZB(+4.89),GABRB3(+4.19),GAP43(+4.63),GFRA2(+7.05),GRIA2(+6.74),GRID2(+6.81),KCNMA1(+2.17),LMX1B(+7.02),NFATC2(+2.1),NOS1(+2.43),NOS3(-5.35),NR2F1(-5.84),NTF3(+3.71),PLCB4(+1.56),PLXNA4(+15.6),POU4F1(+8.63),PSAP(-1.61),RIMS2(+2.06),SEZ6(+3.02),SEZ6L(+14.9),SLC17A8(+2.7),SLIT2(-1.78),SLITRK6(+7.08),TENM3(+1.62)
Cardiovascular Disease,Neurological Disease,Organismal Injury and Abnormalities	Cerebrovascular dysfunction	3.5e-10		1.212	76	52	24	ABCC8(+4.12),ADCY8(+3.77),AGER(-1.91),ANGPT1(+5.6),ATP1A3(+2.61),BCHE(+2.65),CA4(-6.57),CACNA1B(-1.83),CACNA1C(+3.21),CACNA1F(-3.83),CACNA2D1(+3.79),CFH(+16.28),CHRM2(+1.92),CHRM3(+2.33),CHRNA3(+3.24),CHRNA5(+2.29),CHRNA7(+1.94),CHRNB2(+2.52),CNR1(+8.01),DHFR(+1.79),DRD4(-3.01),EDNRA(+9.03),EGFR(+2.45),ENTPD1(-1.58),ETS2(+2.51),F5(+4.74),FN1(+3.0),GAA(-1.56),GABRA3(+2.43),GABRB3(+4.19),GABRE(+2.4…
Cancer,Organismal Injury and Abnormalities	Mesenchymal tumor	3.52e-10			50	42	8	ALK(+3.89),AXIN2(+3.19),CD44(+3.93),CDKN1A(-2.32),COL13A1(+2.88),COL14A1(+4.09),COL15A1(+2.47),COL16A1(+5.19),COL17A1(+6.4),COL1A1(+3.04),COL21A1(+5.93),COL23A1(+2.5),COL25A1(+3.53),COL27A1(+1.86),COL2A1(+1.9),COL3A1(+8.18),COL5A1(+2.19),COL6A2(+1.72),COL8A2(+5.86),COL9A1(+1.52),COL9A2(+2.15),COL9A3(+4.01),DDR1(-1.74),DDR2(+4.69),DHFR(+1.79),E2F1(+2.7),E2F2(+4.11),EGFR(+2.45),FGFR1(+1.86),FGFR3(-…
Digestive System Development and Function,Gastrointestinal Disease,Organismal Development,Organismal Injury and Abnormalities	Abnormal morphology of mouth	3.57e-10			40	34	6	ABCA12(+2.54),ANKH(+1.95),AXIN2(+3.19),BCL11B(+4.28),BMP4(+1.85),CDKN1A(-2.32),CDON(+1.56),CREB3L2(+1.81),CYP51A1(-1.69),DCN(+24.15),E2F1(+2.7),EDNRA(+9.03),EGFR(+2.45),FGFR1(+1.86),FOXF2(+7.89),GAS1(+3.38),INHBA(+3.11),INHBB(+5.09),ITGA11(+5.36),LEF1(+2.55),LRP4(+1.89),LTBP3(+2.15),MSX1(+6.43),NDST1(+1.6),NFIB(+3.99),PRRX1(+8.65),PTH1R(+1.87),RRM2B(-2.58),SATB2(+2.98),SIX3(-4.44),SLC24A4(+4.04),…
Neurological Disease,Organismal Injury and Abnormalities	Abnormality of cerebral cortex	3.57e-10		-0.278	68	50	18	ADCY1(+3.35),ASPM(+2.11),AXL(-1.57),B4GALNT1(+3.19),BBC3(-1.77),BRINP1(+3.57),BRSK1(-1.69),BRSK2(+2.27),CAPN1(+1.7),CDK5R1(+2.97),CDON(+1.56),CHL1(+2.12),CHRNA7(+1.94),CHRNB2(+2.52),CNR1(+8.01),CRMP1(+1.96),CTSV(+2.48),CUX2(+1.74),CXCR4(+2.78),DAB1(+2.05),DDIT3(-2.04),EGFR(+2.45),EMX1(+3.76),EMX2(-1.97),ERBB3(+2.29),ESCO2(+2.34),ETS2(+2.51),FEZF1(-11.57),FEZF2(-3.35),FGF1(+2.78),GAP43(+4.63),GM2A…
Cancer,Gastrointestinal Disease,Organismal Injury and Abnormalities	Rectum cancer	3.62e-10			119	91	28	ABCA12(+2.54),ADCY2(-1.72),AMER2(+6.05),AMIGO2(+3.9),ANKRD26(-1.77),ATP8A1(+3.33),ATP9A(+1.56),AXIN2(+3.19),BUB1B(+1.96),C11orf87(+3.68),CACNA1B(-1.83),CALD1(+1.68),CCDC102B(-4.43),CCDC141(+4.04),CD44(+3.93),CDC6(+2.07),CDH23(-1.49),CELSR2(-1.92),CENPF(+1.71),CEP290(-1.67),CFI(+2.44),CNGA3(+5.89),CNTNAP4(+2.49),COG3(-1.58),CPAMD8(+1.7),CSMD1(+6.16),DCLK1(+4.51),DCN(+24.15),DDR2(+4.69),DDX60L(+2.1…
Neurological Disease,Organismal Injury and Abnormalities,Psychological Disorders	Amyotrophic lateral sclerosis	3.63e-10			61	45	16	ABCA8(+3.17),ACTN3(-4.12),ANG(-3.03),C9orf72(-2.4),CALM1 (includes others)(+1.49),CDC42EP3(+2.0),CDKN1A(-2.32),CHCHD10(-1.98),CHGB(+5.21),CHRM2(+1.92),CHRM3(+2.33),COL1A1(+3.04),COL3A1(+8.18),DAB1(+2.05),DRD4(-3.01),ENO3(-3.41),ETS2(+2.51),FBLN1(+4.81),FGFR3(-2.34),FOXF2(+7.89),FOXO1(+2.33),FUCA1(-2.68),FUS(+1.71),GABRA3(+2.43),GABRB3(+4.19),GABRE(+2.41),GABRP(+8.82),GRIN2C(-2.81),HMGCR(-2.13),HR…
Cellular Development,Cellular Growth and Proliferation,Nervous System Development and Function,Tissue Development	Development of central nervous system cells	3.78e-10		1.612	34	27	7	ADCYAP1(+4.25),ADGRB1(+2.1),AGER(-1.91),ANGPT1(+5.6),ARX(-5.71),ASCL1(+5.3),CDK6(+2.2),CHL1(+2.12),CNR1(+8.01),CXCR4(+2.78),DLL1(-2.54),EGFR(+2.45),EPHA2(-1.74),FGFR1(+1.86),FOXP2(+5.5),GALNS(+1.72),GRM5(+3.07),HEY1(+2.26),HEY2(+4.4),LAMC3(+4.15),MAP2K1(-1.55),MYT1L(+13.02),NEUROD2(+2.51),NEUROD6(+7.64),NEUROG2(+5.17),NOTCH1(-1.48),NR1D1(-2.39),PMP22(+2.85),ROR1(+2.54),ROR2(+2.36),SLC17A6(+7.47),…
Cancer,Organismal Injury and Abnormalities	Malignant neoplasm of connective or soft tissue of abdomen	3.97e-10			129	103	26	ABCA12(+2.54),ADARB2(+3.39),AKAP6(+1.88),ANGPT1(+5.6),ANKRD26(-1.77),AP3B2(+2.89),ATP8A2(+2.14),BRCA1(+1.77),BUB1B(+1.96),C3orf52(+2.26),CACNA1B(-1.83),CACNA1G(+2.29),CCDC88B(-4.67),CDH1(+3.1),CFH(+16.28),CHD5(+3.82),CHRM2(+1.92),CHRNA7(+1.94),CIB1(-2.02),CLDN3(-2.47),COL3A1(+8.18),CSMD3(+3.28),CUX2(+1.74),DDRGK1(-2.34),DHFR(+1.79),DNASE2(-1.68),DOK6(+1.99),DPYD(+2.12),DRD4(-3.01),DTX3L(+2.39),EG…
Cancer,Gastrointestinal Disease,Organismal Injury and Abnormalities	Rectum tumor	4.13e-10			120	92	28	ABCA12(+2.54),ADCY2(-1.72),AMER2(+6.05),AMIGO2(+3.9),ANKRD26(-1.77),ATP8A1(+3.33),ATP9A(+1.56),AXIN2(+3.19),BUB1B(+1.96),C11orf87(+3.68),CACNA1B(-1.83),CALD1(+1.68),CCDC102B(-4.43),CCDC141(+4.04),CD44(+3.93),CDC6(+2.07),CDH23(-1.49),CELSR2(-1.92),CENPF(+1.71),CEP290(-1.67),CFI(+2.44),CNGA3(+5.89),CNTNAP4(+2.49),COG3(-1.58),CPAMD8(+1.7),CSMD1(+6.16),DCLK1(+4.51),DCN(+24.15),DDR2(+4.69),DDX60L(+2.1…
Cell-To-Cell Signaling and Interaction,Nervous System Development and Function	Action potential of neurons	4.15e-10		-0.453	41	39	2	ADCY1(+3.35),CACNA1G(+2.29),CHRNA7(+1.94),CNR1(+8.01),CPLX2(+1.98),FOXO1(+2.33),GABBR2(+3.43),GDAP1(+2.62),GRIA1(+1.96),GRIA2(+6.74),GRIA4(+2.25),GRID2(+6.81),GRIK2(+4.11),GRM2(+4.8),GRM5(+3.07),HCN1(+3.12),HCN2(+2.31),KALRN(+2.8),KCNA1(+2.6),KCNC1(+3.12),KCNC2(+7.64),KCND2(+3.88),KCNK3(+5.6),KCNMA1(+2.17),KCNQ2(+2.98),KCTD12(+5.06),NTF3(+3.71),P2RX3(+6.68),PHYH(-1.85),PMP22(+2.85),SCN1A(+5.65),S…
Cancer,Hematological Disease,Immunological Disease,Organismal Injury and Abnormalities	Myeloid leukemia	4.15e-10		0.142	302	229	73	ADAM12(+3.56),ADAMTS5(+2.45),ADCY1(+3.35),ADCYAP1R1(+5.81),AFF3(+1.85),AKAP2(+2.04),ALK(+3.89),ALOX15(-2.39),ANGPT1(+5.6),ANGPTL2(+2.25),ANK2(+2.8),ANKRD26(-1.77),ANKS1B(+2.02),ANO2(+4.77),ANO4(+2.57),ANXA2(+1.65),APCDD1(+15.97),APEX1(+1.71),ARHGAP31(+4.04),ATL1(+2.14),ATP1B1(-2.11),ATP8A2(+2.14),AXIN2(+3.19),AXL(-1.57),B4GALNT1(+3.19),BACH2(+1.83),BBC3(-1.77),BCL11B(+4.28),BIRC5(+2.19),BNC2(+3.4…
Skeletal and Muscular Disorders	Limb defect	4.38e-10		-1.027	71	52	19	ATP1A3(+2.61),BMP4(+1.85),BMPER(+5.67),BMPR1B(-2.97),CACNA1C(+3.21),CCN3(+4.98),CDK20(-1.81),CELSR2(-1.92),CHPF(-1.59),COL27A1(+1.86),COL2A1(+1.9),COL9A1(+1.52),COL9A2(+2.15),CRABP1(-3.88),CRABP2(-1.58),CYP51A1(-1.69),DACT1(+2.82),DAD1(-1.61),DLL3(+3.98),ESCO2(+2.34),ETS2(+2.51),FBLN1(+4.81),FGFR1(+1.86),FGFR3(-2.34),FRZB(+4.89),GAS1(+3.38),H19(+1.99),HDAC6(-1.75),HELLS(+1.95),HTR2A(+3.27),IFT172…
Cell Cycle	Arrest in interphase	4.52e-10			105	83	22	AFAP1-AS1(+1.93),AHR(+3.68),ALOX15(-2.39),ANXA2(+1.65),ATF5(+2.66),AXL(-1.57),BIRC5(+2.19),BLID(+4.56),BMP4(+1.85),BORA(-1.95),BRCA1(+1.77),BRSK2(+2.27),BTRC(+1.67),CAMKK2(+2.21),CCNA2(+1.74),CCNB1(+1.58),CD44(+3.93),CDC25A(+1.75),CDC25B(+2.16),CDC25C(+1.99),CDC6(+2.07),CDCA2(+1.8),CDH1(+3.1),CDK5RAP3(-1.65),CDKN1A(-2.32),CDKN1C(-1.78),CEBPD(+2.36),CHAF1A(+2.72),CYP1B1(+2.61),DCN(+24.15),DCX(+1.9…
Connective Tissue Development and Function,Connective Tissue Disorders,Organismal Development,Organismal Injury and Abnormalities,Skeletal and Muscular Disorders,Skeletal and Muscular System Development and Function,Tissue Development	Abnormal morphology of skull	4.56e-10			56	48	8	ANKH(+1.95),ARSB(+1.72),BMP1(+1.86),BMP4(+1.85),BMPER(+5.67),CCN3(+4.98),CDO1(-1.69),CDON(+1.56),COL2A1(+1.9),CREB3L2(+1.81),CTNNBIP1(+1.87),DDR1(-1.74),DDR2(+4.69),DLX2(+2.73),EDNRA(+9.03),EGFR(+2.45),FGFR3(-2.34),FGFRL1(-1.69),FOS(+2.02),FOXF2(+7.89),GAS1(+3.38),INHBA(+3.11),KLF2(+3.29),LEF1(+2.55),LMX1B(+7.02),LTBP3(+2.15),MMP16(+2.82),MMP2(+2.64),MSI1(-1.68),MSX1(+6.43),NABP2(-1.89),NDST1(+1.…
Cancer,Neurological Disease,Organismal Injury and Abnormalities	Glioma cancer	4.56e-10		1.103	192	141	51	ABCA8(+3.17),ABCC9(+2.43),ADAMTS5(+2.45),ADAMTS8(+1.83),ADARB1(+1.73),ADCY8(+3.77),ADGRB1(+2.1),ADGRG1(-1.62),AK5(+2.51),ALCAM(+3.09),ALDOA(-1.51),ALDOC(-3.65),ALK(+3.89),ANK2(+2.8),ANO2(+4.77),APOL4(+2.77),ARF4(-2.49),ARHGAP33(+2.31),ARRB1(+2.62),ASPM(+2.11),ASTN2(+1.88),ATP1B1(-2.11),AXIN2(+3.19),BCL11A(+3.04),BMF(+1.59),BOC(+1.7),BRCA1(+1.77),BRIP1(+2.46),CALN1(+3.96),CCDC80(+1.98),CCDC9(-2.02…
Developmental Disorder	Midline defect	4.95e-10	Decreased	-3.498	69	52	17	AHR(+3.68),BMP4(+1.85),BMPER(+5.67),BRCA1(+1.77),CBS/CBSL(+2.37),CCL2(+2.16),CDH1(+3.1),CDK20(-1.81),CDKN1A(-2.32),COL2A1(+1.9),CTNNBIP1(+1.87),CYP51A1(-1.69),DACT1(+2.82),DHCR7(-1.88),DHFR(+1.79),DLC1(+2.74),DNMT3B(+2.47),ECE2(-2.4),EDNRA(+9.03),EGFR(+2.45),ESRP1(+3.38),FBLN1(+4.81),FGFR1(+1.86),FOXF2(+7.89),GABRB3(+4.19),GAS1(+3.38),H19(+1.99),HEY2(+4.4),IFT172(-1.52),INSIG1(-2.21),INSIG2(-2.22…
Cancer,Organismal Injury and Abnormalities	Subcutaneous tumor	5.2e-10			88	74	14	ABCA8(+3.17),ADAM12(+3.56),ADARB1(+1.73),AHR(+3.68),ALDOA(-1.51),ANGPT1(+5.6),ATRNL1(+1.51),AXIN2(+3.19),CDC42EP3(+2.0),CFH(+16.28),COL13A1(+2.88),COL14A1(+4.09),COL15A1(+2.47),COL16A1(+5.19),COL17A1(+6.4),COL1A1(+3.04),COL21A1(+5.93),COL23A1(+2.5),COL25A1(+3.53),COL27A1(+1.86),COL2A1(+1.9),COL3A1(+8.18),COL5A1(+2.19),COL6A2(+1.72),COL8A2(+5.86),COL9A1(+1.52),COL9A2(+2.15),COL9A3(+4.01),CRABP2(-1…
Cardiovascular System Development and Function	Morphogenesis of cardiovascular system	5.39e-10		0.114	65	47	18	AHR(+3.68),ANGPT1(+5.6),ANKRD1(-2.65),ANXA2(+1.65),BMP4(+1.85),BMP5(+3.06),BMPR2(+2.38),CHGA(+14.1),CLIC4(+1.64),COL1A1(+3.04),COL2A1(+1.9),COL5A1(+2.19),CXCR4(+2.78),CYP1B1(+2.61),DCHS1(+1.75),DISP1(+1.61),DLC1(+2.74),DLL1(-2.54),EMILIN1(+5.93),EPHA2(-1.74),EPOR(-2.66),FGFR1(+1.86),FGFRL1(-1.69),FOXC1(+7.92),FZD1(+1.9),GAA(-1.56),HEG1(+1.87),HEY1(+2.26),HEY2(+4.4),IFT172(-1.52),ISL1(+4.84),KDR(+…
Organismal Injury and Abnormalities,Tissue Morphology	Abnormal morphology of epithelial tissue	5.56e-10			98	72	26	ABCA12(+2.54),ADAM9(-1.69),ADCYAP1(+4.25),AHR(+3.68),ANO1(+5.01),ARRB1(+2.62),ARSB(+1.72),ASCL1(+5.3),ASPM(+2.11),ATP8A2(+2.14),AXL(-1.57),B4GALNT1(+3.19),BACE2(+1.84),BCL11B(+4.28),BMP4(+1.85),BRCA1(+1.77),CBS/CBSL(+2.37),CD44(+3.93),CDK20(-1.81),CDKN1A(-2.32),CEBPD(+2.36),CFH(+16.28),CHRNB2(+2.52),CISH(+2.15),CLIC4(+1.64),COL13A1(+2.88),COL15A1(+2.47),COL8A2(+5.86),CYP2E1(-2.25),DCN(+24.15),DDR…
Cancer,Organismal Injury and Abnormalities,Skeletal and Muscular Disorders	Muscle tumor	5.99e-10		0.277	138	109	29	ABCA8(+3.17),ABCC5(+1.68),ADAM12(+3.56),ADAM9(-1.69),ADAMTSL3(+10.28),ADARB1(+1.73),AHR(+3.68),ALDH1A3(+3.21),ALDOA(-1.51),ALK(+3.89),ANGPT1(+5.6),ASPN(+14.68),ASS1(+2.45),ATL3(+1.78),ATRNL1(+1.51),BRCA1(+1.77),CD44(+3.93),CDC42EP3(+2.0),CDH1(+3.1),CDH22(+3.91),CDKN1A(-2.32),CFH(+16.28),CLPP(-1.95),CNR1(+8.01),COL13A1(+2.88),COL21A1(+5.93),CPAMD8(+1.7),CRABP2(-1.58),CTSC(+2.16),CXCL14(+1.96),CYP1…
Cell Cycle	Mitosis	6.03e-10	Increased	2.669	111	84	27	ACRBP(-2.32),AHR(+3.68),ANGPTL2(+2.25),ARRB1(+2.62),ARSB(+1.72),ASCL1(+5.3),AXL(-1.57),BIRC5(+2.19),BMP4(+1.85),BMPR1B(-2.97),BORA(-1.95),BRCA1(+1.77),BRINP1(+3.57),BRINP2(+3.07),BRINP3(+6.4),BTG3(-2.04),BTRC(+1.67),BUB1B(+1.96),CCNA2(+1.74),CCNB1(+1.58),CDC25A(+1.75),CDC25B(+2.16),CDC25C(+1.99),CDC6(+2.07),CDK11A(-1.68),CDKN1A(-2.32),CENPA(+2.09),CENPF(+1.71),CENPW(+2.33),CHMP2A(-1.77),CUL7(-1.6…
Digestive System Development and Function,Embryonic Development,Organismal Development	Development of palate	6.12e-10			30	24	6	BNC2(+3.43),CDON(+1.56),COL2A1(+1.9),FOXF2(+7.89),FZD1(+1.9),GABRB3(+4.19),GAS1(+3.38),IFT172(-1.52),INHBA(+3.11),INSIG1(-2.21),INSIG2(-2.22),MSX1(+6.43),OSR1(+4.85),PDGFRA(+3.34),PKDCC(+3.41),PLEKHA1(-1.71),PRDM16(-1.93),PRRX1(+8.65),SATB2(+2.98),SGPL1(+1.69),SHOX2(+5.67),SKI(+1.66),SNAI1(+2.24),SNAI2(+6.19),TBX1(+5.18),TBX2(+2.41),TBX3(+6.55),TFAP2A(+4.49),TGFBR3(-1.91),TP63(+7.65)
Cancer,Endocrine System Disorders,Organismal Injury and Abnormalities,Reproductive System Disease	Mixed ovarian carcinoma	6.31e-10			178	136	42	ABCA12(+2.54),ABCC4(-2.19),ACP5(-2.76),ADAMTS10(+3.13),ADAMTS20(+2.39),ADCY2(-1.72),ADCYAP1R1(+5.81),ADD2(+2.03),AFF3(+1.85),AIF1(-4.76),AKAP6(+1.88),AMOTL1(+1.8),ANKRD24(-3.32),AOPEP(+1.65),ARHGEF40(+1.86),ASPM(+2.11),ATP8A1(+3.33),BRCA1(+1.77),BRINP3(+6.4),C1orf61(+7.51),CACNA1B(-1.83),CACNA1E(+4.04),CACNA2D1(+3.79),CACNA2D3(+5.28),CADPS(+1.95),CCN4(+3.55),CD109(+2.35),CDH18(+2.06),CDO1(-1.69),…
Cell Morphology	Shape change of neurites	6.33e-10	Increased	4.148	80	71	9	A2M(+4.05),ADCY3(+1.72),ADCYAP1(+4.25),ADGRB1(+2.1),APBA1(+2.1),ARHGAP33(+2.31),BCL11B(+4.28),BSN(+2.15),CALD1(+1.68),CAMK2B(+3.05),CAMKK2(+2.21),CDKN1A(-2.32),CHL1(+2.12),CHN1(-1.64),CHRNA7(+1.94),CHRNB2(+2.52),CNR1(+8.01),COL25A1(+3.53),CRMP1(+1.96),DACT1(+2.82),DCX(+1.97),DOCK1(+1.85),DOCK10(+2.67),DOCK7(+1.56),DPYSL4(+1.81),ELAVL4(+5.59),EPHB1(+2.81),ETV4(+2.16),FOS(+2.02),GABRB3(+4.19),GALNS…
Organismal Development,Organismal Injury and Abnormalities	Abnormal morphology of abdomen	6.37e-10			194	128	66	ABCC4(-2.19),ADD2(+2.03),AGER(-1.91),AHR(+3.68),ALOX15(-2.39),APEX1(+1.71),ARFGEF3(-1.73),ARSB(+1.72),ARX(-5.71),AXL(-1.57),BBC3(-1.77),BMF(+1.59),BMP1(+1.86),BMP4(+1.85),BMPER(+5.67),BMPR1B(-2.97),BRCA1(+1.77),BSCL2(-1.53),C4A/C4B(+2.69),CABLES1(+2.44),CACNA2D1(+3.79),CADPS(+1.95),CBS/CBSL(+2.37),CCN3(+4.98),CD44(+3.93),CDC25B(+2.16),CDK6(+2.2),CDKN1A(-2.32),CDKN1C(-1.78),CFH(+16.28),CFI(+2.44),…
Cardiovascular Disease,Developmental Disorder	Congenital anomaly of cardiovascular system	6.77e-10	Decreased	-4.04	75	54	21	ANGPT1(+5.6),ANK2(+2.8),ANKRD1(-2.65),BICC1(+4.24),BMP1(+1.86),BMPR2(+2.38),CACNA1C(+3.21),CALM1 (includes others)(+1.49),CCDC151(-2.08),CEP290(-1.67),CRELD1(-2.41),CXCR4(+2.78),CYP51A1(-1.69),DISP1(+1.61),DLC1(+2.74),DNAH11(+2.5),DNMT3B(+2.47),DOCK1(+1.85),ECE2(-2.4),EDNRA(+9.03),EDNRB(-4.04),EGFR(+2.45),ENO2(-1.81),FBLN1(+4.81),FGFR1(+1.86),FGFRL1(-1.69),FOXO1(+2.33),HEY2(+4.4),HMGCR(-2.13),HTR…
Auditory and Vestibular System Development and Function,Nervous System Development and Function	Hearing	7.03e-10		1.667	44	35	9	BARHL1(+2.44),BMP4(+1.85),CDH1(+3.1),CDH23(-1.49),CEMIP(+3.39),CHRNB2(+2.52),COL1A1(+3.04),COL2A1(+1.9),COL9A1(+1.52),CRYM(+4.04),EML2(-2.13),FGFR1(+1.86),FOS(+2.02),GABRB3(+4.19),GRID1(+2.75),GRM7(+2.77),ICAM1(-2.26),KCNA1(+2.6),KCNMA1(+2.17),MBP(+2.44),MYO15A(-2.44),MYO3A(+1.99),NAV2(+2.16),NR2F1(-5.84),OTOG(+5.81),PAX3(+2.67),PSAP(-1.61),PTN(+2.21),RIPOR2(+2.15),ROR1(+2.54),SALL4(-2.67),SCN8A(…
Cancer,Neurological Disease,Organismal Injury and Abnormalities	Central nervous system neuroepithelial tumor	7.07e-10		1.103	200	149	51	ABCA8(+3.17),ABCC9(+2.43),ADAMTS5(+2.45),ADAMTS8(+1.83),ADARB1(+1.73),ADCY8(+3.77),ADGRB1(+2.1),ADGRG1(-1.62),AK5(+2.51),AKAP2(+2.04),ALCAM(+3.09),ALDOA(-1.51),ALDOC(-3.65),ALK(+3.89),ANK2(+2.8),ANO2(+4.77),APOL4(+2.77),ARF4(-2.49),ARHGAP33(+2.31),ARRB1(+2.62),ASPM(+2.11),ASTN2(+1.88),ATP1B1(-2.11),AXIN2(+3.19),BCL11A(+3.04),BMF(+1.59),BOC(+1.7),BRCA1(+1.77),BRIP1(+2.46),C16orf71(-1.91),CALN1(+3.…
Skeletal and Muscular System Development and Function	Mineralization of bone	7.21e-10		0.998	47	29	18	ALOX15(-2.39),ANKH(+1.95),ASPN(+14.68),ATRAID(-1.69),AXIN2(+3.19),BMP4(+1.85),BMPR1B(-2.97),BMPR2(+2.38),COL2A1(+1.9),CYP27B1(-2.51),DDR1(-1.74),DDR2(+4.69),EBF1(+17.28),EIF2AK3(-2.83),FGFR3(-2.34),GREM1(-1.83),ITGA11(+5.36),LOX(+1.9),LTBP3(+2.15),MAP2K1(-1.55),MTSS1(+1.87),NABP2(-1.89),NELL1(+3.29),NFIX(+13.48),NOS1(+2.43),NOS3(-5.35),NOTCH1(-1.48),NPY2R(-4.4),OSR1(+4.85),PKDCC(+3.41),PRLR(+2.46…
Cardiovascular System Development and Function	Morphology of vessel	7.36e-10			82	59	23	AGER(-1.91),AHR(+3.68),AIF1(-4.76),ANGPT1(+5.6),AXL(-1.57),BMP1(+1.86),BMP4(+1.85),BMPR2(+2.38),CBS/CBSL(+2.37),CCL2(+2.16),CDO1(-1.69),CDON(+1.56),CFH(+16.28),COL15A1(+2.47),COL3A1(+8.18),COL5A1(+2.19),CXCR4(+2.78),CYP51A1(-1.69),DDR1(-1.74),DLX2(+2.73),EDNRA(+9.03),EDNRB(-4.04),EHD4(-2.45),ELK3(+2.33),EPOR(-2.66),FBLN1(+4.81),FBLN5(+3.95),FBN1(+1.56),FGF1(+2.78),FN1(+3.0),FOXC1(+7.92),FOXM1(+2.…
Gene Expression	Activation of DNA endogenous promoter	7.99e-10	Increased	5.266	233	185	48	ABLIM1(+1.7),ABLIM3(+3.62),ADCYAP1(+4.25),AHR(+3.68),ANKRD1(-2.65),ARF4(-2.49),ARRB1(+2.62),ARX(-5.71),ASCL1(+5.3),ATF5(+2.66),AUTS2(+3.63),BACH2(+1.83),BARHL1(+2.44),BCL11A(+3.04),BCL11B(+4.28),BLZF1(-2.08),BMP3(+3.85),BMP4(+1.85),BMP5(+3.06),BMPR1B(-2.97),BMPR2(+2.38),BRCA1(+1.77),BRF2(-2.19),BRIP1(+2.46),BSX(+7.77),C1orf61(+7.51),CBX6(+1.78),CBX7(-1.96),CCDC62(-2.39),CDK5RAP3(-1.65),CDK6(+2.2)…
Cellular Development,Cellular Growth and Proliferation	Proliferation of prostate cancer cell lines	8.04e-10		1.739	81	61	20	ADAM9(-1.69),AFAP1(+2.7),ALCAM(+3.09),ANO1(+5.01),AXL(-1.57),BIRC5(+2.19),BMPR1B(-2.97),BRCA1(+1.77),CBX7(-1.96),CD44(+3.93),CDC25B(+2.16),CDH1(+3.1),CDK6(+2.2),CDKN1A(-2.32),CEBPD(+2.36),CHGA(+14.1),CMTM5(-2.58),COBLL1(+1.75),CTNNBIP1(+1.87),DAB2(+1.76),DNAJB2(-1.85),E2F1(+2.7),E2F3(+1.56),EGFR(+2.45),ENTPD1(-1.58),EPAS1(+2.73),ERBB3(+2.29),ETS1(+1.84),ETS2(+2.51),FABP5(+2.52),FDFT1(-2.01),FGF1(…
Cancer,Organismal Injury and Abnormalities	Fibrous tissue tumor	8.57e-10			47	40	7	ALK(+3.89),AXIN2(+3.19),CD44(+3.93),CDKN1A(-2.32),COL13A1(+2.88),COL14A1(+4.09),COL15A1(+2.47),COL16A1(+5.19),COL17A1(+6.4),COL1A1(+3.04),COL21A1(+5.93),COL23A1(+2.5),COL25A1(+3.53),COL27A1(+1.86),COL2A1(+1.9),COL3A1(+8.18),COL5A1(+2.19),COL6A2(+1.72),COL8A2(+5.86),COL9A1(+1.52),COL9A2(+2.15),COL9A3(+4.01),DDR1(-1.74),DDR2(+4.69),DHFR(+1.79),E2F1(+2.7),E2F2(+4.11),EGFR(+2.45),FGFR1(+1.86),FGFR3(-…
Cancer,Organismal Injury and Abnormalities	Growth of malignant tumor	8.84e-10		0.719	103	76	27	ABCC4(-2.19),ADAM9(-1.69),ADCYAP1R1(+5.81),ADGRG1(-1.62),ALK(+3.89),APCDD1(+15.97),BAMBI(+1.63),BIRC5(+2.19),BRCA1(+1.77),BST2(-3.56),BTG3(-2.04),CCL2(+2.16),CCN3(+4.98),CCN4(+3.55),CD44(+3.93),CDH1(+3.1),CENPA(+2.09),CXCR4(+2.78),DCN(+24.15),DDIT3(-2.04),DIRAS1(+1.91),DOCK4(+2.36),EGFR(+2.45),EMX2(-1.97),ENTPD1(-1.58),EPHA2(-1.74),ERBB3(+2.29),FBLN5(+3.95),FGF1(+2.78),FGFR1(+1.86),FGFR3(-2.34),F…
Digestive System Development and Function,Gastrointestinal Disease	Abnormal morphology of digestive system	9.09e-10			126	89	37	ABCA12(+2.54),ABCC4(-2.19),AHR(+3.68),ANKH(+1.95),APEX1(+1.71),ARFGEF3(-1.73),ARX(-5.71),ASCL1(+5.3),AXIN2(+3.19),BCL11B(+4.28),BMP1(+1.86),BMP4(+1.85),BRCA1(+1.77),BSCL2(-1.53),C4A/C4B(+2.69),CADPS(+1.95),CBS/CBSL(+2.37),CDKN1A(-2.32),CDON(+1.56),CHRNA3(+3.24),CISH(+2.15),COL3A1(+8.18),CREB3L2(+1.81),CTNNBIP1(+1.87),CYP1A1(+5.71),CYP2E1(-2.25),CYP51A1(-1.69),DACT1(+2.82),DCHS1(+1.75),DCN(+24.15)…
Cancer,Organismal Injury and Abnormalities	Adenosquamous carcinoma	9.1e-10			178	138	40	ABCA12(+2.54),ABCC4(-2.19),ADAMTS10(+3.13),ADAMTS20(+2.39),ADCY2(-1.72),ADCYAP1R1(+5.81),ADD2(+2.03),AFF3(+1.85),AIF1(-4.76),AKAP6(+1.88),ALK(+3.89),AMOTL1(+1.8),ANKRD24(-3.32),AOPEP(+1.65),ARHGEF40(+1.86),ASPM(+2.11),ATP8A1(+3.33),BRCA1(+1.77),BRINP3(+6.4),C1orf61(+7.51),CACNA1B(-1.83),CACNA1E(+4.04),CACNA2D1(+3.79),CACNA2D3(+5.28),CADPS(+1.95),CCN4(+3.55),CD109(+2.35),CDH18(+2.06),CDO1(-1.69),C…
Connective Tissue Disorders,Organismal Injury and Abnormalities,Skeletal and Muscular Disorders,Skeletal and Muscular System Development and Function	Abnormal morphology of skeleton	9.2e-10			69	48	21	ARSB(+1.72),BMP4(+1.85),BMPER(+5.67),BMPR1B(-2.97),CCN3(+4.98),CDK20(-1.81),CDKN1A(-2.32),CDO1(-1.69),CHPF(-1.59),COL27A1(+1.86),COL2A1(+1.9),COL9A1(+1.52),CRISPLD2(+7.46),CYP51A1(-1.69),DACT1(+2.82),DCHS1(+1.75),DLL1(-2.54),DLL3(+3.98),ECE2(-2.4),EDNRA(+9.03),EIF2AK3(-2.83),FBN1(+1.56),FGFR1(+1.86),FGFR3(-2.34),FGFRL1(-1.69),FOSL2(+1.73),FRZB(+4.89),GAS1(+3.38),HELLS(+1.95),IGFALS(-2.66),INPP5D(…

## Sheet: Network
Rank	Top Diseases and Functions	Score	N	Pos	Neg	Molecules in Network
1	Cardiovascular System Development and Function, Organ Development, Skeletal and Muscular System Development and Function	41	34	27	7	ABLIM3(+3.62),AKAP2(+2.04),ARPIN/ARPIN-AP3S2(+1.74),BLID(+4.56),C14orf28(-2.67),C1orf61(+7.51),CDH1(+3.1),CHN1(-1.64),DOCK10(+2.67),DOCK9(+1.6),DPAGT1(-1.55),FOXF2(+7.89),GTPase,HCN1(+3.12),HCN2(+2.31),HCN4(+2.06),HEMK1(-1.81),LRRC7(+2.72),MACC1(+2.74),MAPK8IP2(+2.79),MTUS1(+3.45),MUC16(+5.63),NAV2(+2.16),PCDH1(-1.76),PDXDC1(-1.78),PHACTR2(+1.54),PROM2(-2.06),RDX(+1.47),SH3D19(+1.61),SLC38A1(+1.8…
2	Cell Cycle, Cellular Assembly and Organization, Lipid Metabolism	38	33	22	11	ACSBG1(-3.4),ACSL,ACSL3(-1.86),ASTN2(+1.88),BUB1B(+1.96),C1orf52(-1.77),CCDC174(-1.69),DIAPH3(+1.93),dystroglycan,FAM111B(+2.72),HECW1(+5.63),IFT172(-1.52),ISY1-RAB43(-18.3),KIF26B(+4.39),KLC4(-1.52),KNL1(+2.04),LDLRAD4(+4.02),LHX4(+2.5),LINC00467(-2.69),NDC80(+2.0),OXNAD1(-2.11),PLCXD3(+3.44),PLPBP(-1.98),SGCD(+4.38),SLC16A9(+2.61),SLC27A2(-2.29),SOCS2-AS1(+4.67),SPC24(+2.39),SSPN(+1.88),SV2B(+5…
3	Cancer, Hematological Disease, Immunological Disease	38	33	27	6	ADARB2(+3.39),BAMBI(+1.63),BMPR1B(-2.97),BMPR2(+2.38),CDHR1(+2.89),CHAF1A(+2.72),DQX1(-4.16),FAM49A(+2.03),HIST2H3C(+2.91),Histone h3,Histone h4,ITM2C(+1.73),KDR(+2.05),KLF2(+3.29),LEF1(+2.55),LRRC55(+1.99),MKNK2(-1.61),MVB12B(+1.6),NEDD4L(+1.95),P4HA3(+3.58),PDGFRA(+3.34),PER1(-2.15),PRDM16(-1.93),PRRT4(+2.66),RASL11B(+3.27),RBMS3(+2.55),RDH10(+5.3),SERPINF1(+1.8),SFPQ(+2.03),SLCO2A1(+3.13),SMAD…
4	Drug Metabolism, Lipid Metabolism, Small Molecule Biochemistry	38	33	20	13	ALKBH7(-1.81),ATF5(+2.66),BRCA1(+1.77),CEBPD(+2.36),CNRIP1(+3.75),CNTN4(+3.64),CYP1A1(+5.71),CYP2C8(+2.62),CYP2E1(-2.25),DDX60L(+2.17),DNHD1(-3.26),ENPP5(-4.43),EPB41L3(+1.91),EPRS(-1.78),FMNL3(+1.91),IFI16(+2.82),KCNK6(-2.73),KLF3(+1.55),MARCH2(-2.06),NOL6(-1.62),REXO4(-1.59),Rnr,SLC46A3(-4.32),SPTBN1(+1.85),TATDN2(+1.81),TES(+2.48),TFRC(+1.88),TIMM10B(-1.95),UBTF(+2.36),unspecific monooxygenase…
5	Cancer, Gastrointestinal Disease, Hepatic System Disease	37	33	19	14	ADAMTS10(+3.13),AP3B2(+2.89),DOCK7(+1.56),FAM163A(+3.34),FSH,GOLGA5(-1.87),HAS2(+4.55),HDAC6(-1.75),HERPUD1(-1.74),KIAA0930(+1.68),KIF21B(+2.32),Lh,MAMLD1(+2.09),MAP2K1(-1.55),NUP188(+1.71),PAN2(-2.57),PGK1(-1.73),PI4K2A(-1.56),PKD2(+1.59),PKM(+1.93),POLE(+1.81),POLE3(-1.8),RABGAP1L(+1.71),RAD50(-2.04),RFTN2(+1.95),RPS17(-1.65),SHCBP1(+2.29),SRSF3(+1.7),TBX3(+6.55),THOC3(-1.85),TK1(+3.69),UBE2M(-…
6	Nervous System Development and Function, Neurological Disease, Organ Morphology	36	32	15	17	ARL1(-1.97),BRF2(-2.19),C16orf71(-1.91),COL14A1(+4.09),EMX1(+3.76),EMX2(-1.97),FAM222A(+3.23),FGFRL1(-1.69),GCA(-3.2),GOLGA1(-2.28),GOLGA4(-1.84),HIST2H2AA3/HIST2H2AA4(+1.76),ILVBL(-1.63),LAMB1(+1.98),LAMB3(+4.06),Laminin (family),MAB21L2(+2.12),MEIS1(-2.08),MEIS2(+1.86),Mmp,MYOCD(+2.22),NKAP(-1.74),OGN(+14.45),PARVA(+1.93),PMEPA1(+3.47),PPP1R15B(-1.73),PRSS33(-4.09),SGPL1(+1.69),SKIL(+1.48),Smad…
7	Kidney Failure, Organismal Injury and Abnormalities, Renal and Urological Disease	35	32	23	9	CD101(+2.64),CENPA(+2.09),CENPF(+1.71),CENPK(+1.95),CENPU(+2.42),CENPW(+2.33),DTX3L(+2.39),FAM173A(-1.7),GABA-A receptor,GABRA3(+2.43),GABRB3(+4.19),GLRA1(+5.8),GOLGA3(-1.84),HAP1(-2.4),IFI44(+4.26),INA(+4.47),KALRN(+2.8),KIF5A(+2.98),LZTS3(-1.78),MZT1(-1.93),NCAPG(+1.83),NEFM(+3.6),NSG2(+6.34),PARP14(+1.67),PARP9(+2.49),RAB7,SH3GL3(+3.02),SLC35F6(-1.69),SNCAIP(+5.11),STAT,SYNC(+2.17),TMEM59L(-1.…
8	Cell-To-Cell Signaling and Interaction, Cellular Development, Cellular Growth and Proliferation	34	32	18	14	ABTB2(+2.14),Actin,ADGRB1(+2.1),ADIPOR1(-1.58),ANXA2(+1.65),BSX(+7.77),BTRC(+1.67),C19orf54(-1.94),CCDC7(-3.05),COX18(-2.0),CUL7(-1.62),DOCK1(+1.85),EHD4(-2.45),EWSR1(+1.51),FOXC1(+7.92),FOXO1(+2.33),HCFC1R1(-1.61),HDDC3(-2.49),HIST2H3D(+3.38),IFI27L2(-2.67),KLF4(+1.98),MAC,MIF4GD(-1.81),OGT(+1.54),POU5F1(+11.76),RNA polymerase II,SEMA6D(+3.72),SLC2A4(-2.3),SOX2(-2.72),TFAP2A(+4.49),UVSSA(-2.49),…
9	Neurological Disease, Organismal Injury and Abnormalities, Psychological Disorders	32	30	18	12	AChR,ALDOC(-3.65),ARHGAP28(+3.07),CDH22(+3.91),CDK5RAP3(-1.65),CHML(+1.53),CHRNA3(+3.24),CHRNA5(+2.29),CHRNB2(+2.52),DDRGK1(-2.34),DIRAS1(+1.91),EDAR(+2.88),EDARADD(+3.77),FBXO41(+2.17),FUCA1(-2.68),Immunoglobulin Lambda Light Chain,MSTO1(-1.97),NFkB (complex),nicotinic acetylcholine receptor,P2RX3(+6.68),PCARE(+4.93),PPARα-RXRα,RAB15(+2.78),RAB31(+2.32),RAP1GDS1(+1.81),RFLNB(+3.76),RTKN2(+1.81),…
10	Cell Morphology, Cell-To-Cell Signaling and Interaction, Nervous System Development and Function	32	30	25	5	BICC1(+4.24),CACNG4(+1.92),CBLN1(+5.11),CPT1,DGCR5(+4.23),EGFR(+2.45),EML2(-2.13),EYS(+2.83),glutamate receptor,GRI,GRIA,GRIA1(+1.96),GRIA2(+6.74),GRIA4(+2.25),GRID1(+2.75),GRID2(+6.81),GRIK2(+4.11),GRIK3(+4.73),GRIN2C(-2.81),GSG1L(+5.71),IL1RAPL2(+2.87),KCNK10(+3.59),NALCN(+3.61),Neurexin,NEURL1(+2.1),NRXN1(+7.42),OLFM1(+3.09),SERTAD4(+6.62),SHISA9(+1.87),SLCO3A1(-2.1),SLITRK3(+2.21),SRRM4(+5.26…
11	Auditory Disease, Infectious Diseases, Respiratory Disease	32	30	18	12	ARL6IP6(-1.88),BSCL2(-1.53),C1orf112(+1.83),CCL2(+2.16),CHD5(+3.82),CMTM5(-2.58),FAM210B(+1.66),FUT9(+2.84),GABA receptor,GABRE(+2.41),GABRP(+8.82),GHDC(-2.6),Iti,KCNQ5(+4.65),LMF1(+3.8),MSI1(-1.68),N-Cadherin,NDRG4(-1.76),NSG1(+2.14),PCDHAC2(+1.84),Pdi,PIMREG(+2.08),PITPNC1(+2.68),PNPO(-3.4),RETSAT(-1.64),RTN1(+3.22),SLC7A11(+3.3),SLC7A2(+7.1),SPINT2(-2.24),TLR7/8,TMUB1(-1.76),TRMT11(-1.9),TRMT1…
12	Cellular Assembly and Organization, Embryonic Development, Nervous System Development and Function	32	30	24	6	AJAP1(+2.43),BMP,BMP3(+3.85),CNTN1(+3.34),CNTN2(+4.37),DPH7(-1.75),EIF4A,ELAVL4(+5.59),GFOD1(+2.79),IGFALS(-2.66),Insulin,IRX2(+2.11),IRX3(+4.51),ISL1(+4.84),KCNA1(+2.6),KCTD8(+2.71),LHX5(-1.77),LMX1B(+7.02),MIR124,MSX1(+6.43),NEUROD2(+2.51),NEUROD6(+7.64),NWD2(+3.38),NXPH4(+4.48),PIEZO2(+3.14),POU4F1(+8.63),PUSL1(-1.96),RALGAPA2(+1.8),RPH3AL(+2.13),SCN9A(+11.17),SERP1(-1.58),SHOX2(+5.67),SLC30A8…
13	Cell-To-Cell Signaling and Interaction, Developmental Disorder, Nervous System Development and Function	32	30	15	15	2-oxoglutarate:oxygen oxidoreductase,ALKBH5(-2.1),Ap1,CAMKV(+2.54),CDCA2(+1.8),DNA-directed RNA polymerase,DNAJA3(-1.56),EAF2(-4.18),FAM13C(+2.49),FGD5(+2.59),FOSL2(+1.73),HIF1AN(-1.52),Holo RNA polymerase II,JMJD6(-1.9),LIMD1(+1.54),LNX2(-1.64),MDGA1(+2.26),NOLC1(-1.5),NPAS3(+1.77),NRXN3(-2.05),P-TEFb,PDZRN3(+2.24),PDZRN4(+5.82),PKDREJ(-2.18),POLR2C(-1.5),POLR2J2/POLR2J3(+2.04),POLR3D(-1.95),POL…
14	Cellular Development, Connective Tissue Development and Function, Tissue Development	30	30	22	8	BCL11A(+3.04),BMP4(+1.85),CADPS(+1.95),CD44(+3.93),CDCA3(+1.93),CORO2A(+2.44),CPLX2(+1.98),DDX18(-1.87),ETS1(+1.84),GOSR2(-1.7),JADE1(+1.63),Lfa-1,MED10(-2.44),MED12L(-1.8),MED8(-1.66),mediator,MYT1L(+13.02),NET1(+2.64),NPNT(+3.37),SLC22A23(+1.5),SMARCA2(+1.75),SNAI2(+6.19),Snare,STX1A(-1.66),Synaptotagmin,Syntaxin,SYT11(-2.06),SYT13(-1.62),SYT14(+2.56),SYT15(+1.89),SYT2(+2.35),SYT4(+8.5),SYT6(+4…
15	Auditory Disease, Cellular Function and Maintenance, Hereditary Disorder	30	29	20	9	ATRAID(-1.69),C11orf87(+3.68),CDH23(-1.49),CTNNAL1(+1.6),Dgk,DGKI(+3.7),Dok,DOK5(+2.15),DOK6(+1.99),EMILIN2(-2.15),ENC1(+2.52),ERBB4 ligand,ERK1/2,FEZF1(-11.57),GFRA2(+7.05),GPRIN1(+5.91),HSF4(-2.58),LINC00461(-2.08),MIR320,MYO15A(-2.44),NELL1(+3.29),NRG3(+2.59),NUBP2(-1.7),PKC alpha/beta,RAI2(+3.96),SLC29A2(-1.87),SPRY3(+1.94),SPRY4(+3.22),SYNE1(+1.75),SYNE2(+1.51),SYNE3(+3.67),TBC1D16(+1.62),TM…
16	Behavior, Cell Signaling, Psychological Disorders	30	29	27	2	ATRNL1(+1.51),B4GALNT1(+3.19),BOC(+1.7),C1QL1(+2.32),C1QL4(+4.27),C1QTNF1(+4.31),CDON(+1.56),CELF4(+2.54),FBLIM1(+2.57),FGF14(+2.35),FOS(+2.02),FRZB(+4.89),GAS1(+3.38),Has,Hedgehog,MKX(+3.01),MPZL2(+2.59),MSRB3(+2.07),NPTX2(+2.67),NPTXR(+1.92),Patched,PRRX1(+8.65),PTCHD1(+2.71),Scf,Scf skp2,SCN2A(+6.01),SCN7A(+8.07),SCN8A(+2.12),SDK1(-1.79),SLC4A10(+3.72),TNMD(+2.38),TWIST,WNT6(+3.83),ZFP36L2(+1.…
17	Carbohydrate Metabolism, Neurological Disease, Small Molecule Biochemistry	30	29	22	7	AGPAT3(+1.58),alpha-N-acetylneuraminate alpha-2,8-sialyltransferase,BACE2(+1.84),cAMP-Gef,Erm,Filamin,HIST1H2BK(+2.37),HIST1H2BL(+3.04),ICAM1(-2.26),ICAM5(-5.14),IGSF8(-1.59),ITPRIP(+1.65),KCND2(+3.88),KCND3(+5.42),KCNIP4(+1.97),Lymphotoxin,MICOS10-NBL1/NBL1(+3.39),NCEH1(-3.99),NCS1(+1.99),NOMO1 (includes others)(-1.65),NRN1(+3.71),PTGFRN(+1.66),RAPGEF4(+2.61),RIMS2(+2.06),RIPOR2(+2.15),ST8SIA2(+…
18	Cardiovascular Disease, Neurological Disease, Organismal Injury and Abnormalities	30	29	19	10	ABCC5(+1.68),CABLES1(+2.44),CDK1-Cyclin B,CDK2-CyclinE,CDKN1A(-2.32),COG1(-1.64),COG3(-1.58),COG6(-2.14),CRNDE(+3.25),EXOC3L1(-2.96),FAT2(+3.44),GADD45,Gcn5l,GUCA1A(-2.44),GUCY,GUCY1A1(+3.08),GUCY1A2(+1.79),HES6(+2.18),KDM4D(-2.23),NABP2(-1.89),NKD2(+2.69),PCBP4(+1.8),RD3(+2.22),S100B(+2.47),SCN1A(+5.65),SCN2B(+3.1),SCN3B(+2.4),sGC,SLC30A5(-1.92),SLC39A7(-1.46),SNTA1(+2.0),SOGA3(+1.94),THADA(+1.6…
19	Developmental Disorder, Hereditary Disorder, RNA Post-Transcriptional Modification	30	29	20	9	ABLIM1(+1.7),AMOTL1(+1.8),BRINP1(+3.57),C6orf62(-1.69),CCDC9(-2.02),Ces,COBLL1(+1.75),Ctbp,DAB1(+2.05),DDX60(+2.55),DEDD2(-2.15),DPH2(-1.96),ELAVL2(+5.16),ELAVL3(+2.83),ESRP1(+3.38),ETV6(+1.96),FBXL7(+2.12),FBXO10(+1.75),GABA-B receptor,Gsk3,H19(+1.99),HNRNPAB(+1.69),MBNL1(+1.87),MBNL3(+1.9),MRPL18(-2.02),NECTIN4(+2.99),NR1D1(-2.39),PAIP2B(-1.89),PARD6G(+1.6),Pias,RBFOX2(+1.91),SEPSECS(-2.17),Sre…
20	Cardiac Dilation, Humoral Immune Response, Protein Synthesis	30	29	16	13	ACBD4(-1.82),ANKRD1(-2.65),ARHGEF40(+1.86),BACH2(+1.83),CBX6(+1.78),CBX7(-1.96),CXCL14(+1.96),DMRT3(-3.67),FAM133A(-2.95),Ferritin,GLT8D2(+3.08),Gpcr,GPR173(-1.62),HIST1H3J(+2.78),HSD17B14(-2.03),IFITM1(-1.87),IgG2a,IgG2b,Igg3,Irp,KHDRBS3(+1.85),KLHL42(+1.56),MAFB(+3.39),MGAT5B(+2.29),MYT1(+2.81),OLFML3(+3.96),PAPPA(+1.92),PHF1(-1.62),RASGRP1(+2.36),RCN3(-2.13),SKIDA1(-1.72),SLC40A1(+4.69),STC2(-…
21	Cell Morphology, Cellular Assembly and Organization, Cellular Function and Maintenance	30	29	14	15	Aconitase,ADCY,Ahr-aryl hydrocarbon-Arnt,ALDOA(-1.51),BRIP1(+2.46),BRSK1(-1.69),CIAO3(-1.93),CLPP(-1.95),CPS1(-2.96),CRYM(+4.04),Fanc,FANCA(+2.73),FOXRED1(-1.8),HSD17B7(-2.16),LOX(+1.9),NFIA(+5.99),NFIX(+13.48),Nuclear factor 1,PIR(-2.59),PSAP(-1.61),RAD52(-1.93),RDH13(-1.63),REC8(-1.86),RMI2(+2.72),RUNX3(+7.22),SCAMP3(-1.88),SIX4(+1.59),SLC39A12(+3.94),SMAD9(+2.24),SQLE(-1.72),SVEP1(+9.53),SWI-S…
22	Cellular Function and Maintenance, Gene Expression, RNA Post-Transcriptional Modification	30	29	21	8	ADD2(+2.03),ALCAM(+3.09),ANKRD29(+2.61),AOPEP(+1.65),CCDC102B(-4.43),COL27A1(+1.86),COLEC12(+1.98),CRELD1(-2.41),DCHS1(+1.75),DERL3(-3.47),Fgf,HEG1(+1.87),IFN alpha receptor,Igh (family),JAM2(+2.07),LGMN(-1.73),MIR17HG(+1.9),MMP17(+2.55),MMP2(+2.64),MVP(-2.6),NREP(+1.77),OPN3(+2.0),PDHX(-1.88),PLAGL1(+1.91),PTN(+2.21),Rab11,RECK(+1.96),RPH3A(+4.96),SBDS(-1.67),SCARA3(+3.58),SCAVENGER receptor CLA…
23	DNA Replication, Recombination, and Repair, Nucleic Acid Metabolism, Small Molecule Biochemistry	30	29	13	16	AMZ2(-1.79),ASPM(+2.11),C1q,Complement,Complement component 1,Cytoplasmic Dynein,DCAF13(-1.61),DLGAP5(+1.73),DYNC1I1(+2.53),EMD(-1.58),ENTPD1(-1.58),ENTPD7(-1.71),FAM83D(+2.32),FSTL4(+4.57),GAA(-1.56),GBF1(-1.73),HAUS4(-1.64),Immunoglobulin,IRS4(-3.01),KCTD12(+5.06),LMO7(+1.86),MCC(+2.27),MROH6(-1.99),MYORG(+1.71),NDEL1(-1.56),nucleoside-triphosphatase,PFAS(+1.6),PNPLA6(-1.61),PPAT(-1.89),RAD54L(…
24	Embryonic Development, Nervous System Development and Function, Organ Development	28	28	21	7	ADARB1(+1.73),ADCY3(+1.72),ARX(-5.71),BARHL1(+2.44),BHLHE22(+5.15),CALB2(+6.38),Calbindin,CCDC88B(-4.67),CELF3(+3.74),CRABP1(-3.88),CRABP2(-1.58),DACT1(+2.82),DACT2(+5.62),DLX2(+2.73),EBF1(+17.28),EBF2(+3.88),EBF3(+4.04),FEZF2(-3.35),Groucho,HHIP(+2.74),Jnk,NTM(+3.4),OPCML(+3.1),PRDM8(+6.17),Rag,Rbp,RBP1(+2.01),RDH,SHISA6(+3.38),SIX3(-4.44),STRA6(+2.0),TBR1(+4.5),TEAD,TLE1(+1.74),TNXB(-2.66)
25	Lipid Metabolism, Small Molecule Biochemistry, Vitamin and Mineral Metabolism	27	28	11	17	ANGPTL2(+2.25),C4BP,CA10(+5.2),CA4(-6.57),Carbonic anhydrase,Collagen type ix,CYYR1(+1.68),DHCR7(-1.88),FADS1(-1.71),FADS2(-1.92),GASK1B(-1.74),Hif,HMG CoA synthase,HMGCS1(-2.27),IDI1(-2.27),INSIG1(-2.21),INSIG2(-2.22),KIF15(+1.97),MFSD2A(-6.79),MPC1(-3.14),MRI1(-1.7),ODF3(-2.16),OMD(+3.88),PHYH(-1.85),PHYHIP(-2.23),PKDCC(+3.41),PMP22(+2.85),RHCE/RHD(-9.84),SH3TC2(+6.8),SHISA2(+3.07),STARD4(-2.18…

## Sheet: Pathway
Pathway	p	State	Z	Ratio	N	Pos	Neg	Molecules
Human Embryonic Stem Cell Pluripotency	1.23729e-05		NaN	0.294	40	33	7	BMP1(+1.86),BMP3(+3.85),BMP4(+1.85),BMP5(+3.06),BMPR2(+2.38),FGFR1(+1.86),FGFR3(-2.34),FGFRL1(-1.69),FOXO1(+2.33),FZD1(+1.9),FZD10(+9.97),FZD8(+3.03),INHBA(+3.11),LEF1(+2.55),MRAS(+1.91),NTF3(+3.71),PDGFD(+2.28),PDGFRA(+3.34),PIK3R1(+2.25),PIK3R3(+1.79),POU5F1(+11.76),S1PR1(-2.26),S1PR3(+1.97),SALL4(-2.67),SMAD7(+1.75),SOX2(-2.72),SPHK1(+1.74),TDGF1(+5.05),TGFB3(+5.19),TGFBR2(+2.5),WNT1(+3.45),WN…
Axonal Guidance Signaling	0.000125903		NaN	0.175	85	73	12	ABLIM1(+1.7),ABLIM3(+3.62),ADAM12(+3.56),ADAM9(-1.69),ADAMTS10(+3.13),ADAMTS14(+3.43),ADAMTS17(+4.3),ADAMTS19(+3.87),ADAMTS20(+2.39),ADAMTS5(+2.45),ADAMTS8(+1.83),AOPEP(+1.65),ARPC4(+1.61),BMP1(+1.86),BMP3(+3.85),BMP4(+1.85),BMP5(+3.06),CXCR4(+2.78),DOCK1(+1.85),ECE2(-2.4),EPHA1(+2.49),EPHA10(+2.62),EPHA2(-1.74),EPHA5(+3.46),EPHA6(+10.2),EPHB1(+2.81),EPHB6(+2.0),FZD1(+1.9),FZD10(+9.97),FZD8(+3.03…
CREB Signaling in Neurons	0.000155324	Activated	3.772	0.226	47	39	8	ADCY1(+3.35),ADCY2(-1.72),ADCY3(+1.72),ADCY8(+3.77),CACNA1B(-1.83),CACNA1C(+3.21),CACNA1E(+4.04),CACNA1F(-3.83),CACNA1G(+2.29),CACNA2D1(+3.79),CACNA2D3(+5.28),CACNA2D4(+4.85),CACNG4(+1.92),CALM1 (includes others)(+1.49),CAMK2B(+3.05),CREB3L4(-2.0),GNAO1(+2.29),GNB3(+2.16),GNG2(+1.65),GNG3(+2.17),GNG4(+2.26),GRIA1(+1.96),GRIA2(+6.74),GRIA4(+2.25),GRID1(+2.75),GRID2(+6.81),GRIK2(+4.11),GRIK3(+4.73)…
Synaptogenesis Signaling Pathway	0.000480828	Activated	4.371	0.188	59	46	13	ADCY1(+3.35),ADCY2(-1.72),ADCY3(+1.72),ADCY8(+3.77),ARPC4(+1.61),CACNA1B(-1.83),CACNA2D1(+3.79),CALM1 (includes others)(+1.49),CAMK2B(+3.05),CDH1(+3.1),CDH18(+2.06),CDH22(+3.91),CDH23(-1.49),CDH7(+2.09),CHN1(-1.64),CPLX2(+1.98),CREB3L4(-2.0),DAB1(+2.05),EPHA1(+2.49),EPHA10(+2.62),EPHA2(-1.74),EPHA5(+3.46),EPHA6(+10.2),EPHB1(+2.81),EPHB6(+2.0),GOSR2(-1.7),GRIA1(+1.96),GRIA2(+6.74),GRIA4(+2.25),GRI…
Hepatic Fibrosis / Hepatic Stellate Cell Activation	0.000599149		NaN	0.22	41	37	4	A2M(+4.05),BAMBI(+1.63),CCL2(+2.16),COL13A1(+2.88),COL15A1(+2.47),COL16A1(+5.19),COL17A1(+6.4),COL1A1(+3.04),COL21A1(+5.93),COL23A1(+2.5),COL25A1(+3.53),COL26A1(+1.81),COL27A1(+1.86),COL2A1(+1.9),COL3A1(+8.18),COL5A1(+2.19),COL6A2(+1.72),COL8A2(+5.86),COL9A1(+1.52),COL9A2(+2.15),COL9A3(+4.01),CYP2E1(-2.25),EDNRA(+9.03),EDNRB(-4.04),EGFR(+2.45),FGF1(+2.78),FGFR1(+1.86),FN1(+3.0),ICAM1(-2.26),IGFBP…
Glutamate Receptor Signaling	0.000617396	Activated	2.53	0.351	20	19	1	CALM1 (includes others)(+1.49),GLS(+1.63),GNB3(+2.16),GNG2(+1.65),GRIA1(+1.96),GRIA2(+6.74),GRIA4(+2.25),GRID1(+2.75),GRID2(+6.81),GRIK2(+4.11),GRIK3(+4.73),GRIN2C(-2.81),GRM2(+4.8),GRM5(+3.07),GRM7(+2.77),SLC17A6(+7.47),SLC17A8(+2.7),SLC1A2(+5.56),SLC1A3(+5.03),SLC38A1(+1.83)
Netrin Signaling	0.000902809		NaN	0.323	21	18	3	ABLIM1(+1.7),ABLIM3(+3.62),CACNA1B(-1.83),CACNA1C(+3.21),CACNA1E(+4.04),CACNA1F(-3.83),CACNA1G(+2.29),CACNA2D1(+3.79),CACNA2D3(+5.28),CACNA2D4(+4.85),CACNG4(+1.92),NFATC2(+2.1),NTN1(+2.48),PPP3CA(+2.76),PRKACB(+1.84),PRKAR1B(+1.76),PRKG1(+3.44),RYR1(-3.07),RYR2(+2.81),UNC5A(+3.2),UNC5C(+3.35)
Sperm Motility	0.000930303	Activated	2.828	0.204	45	33	12	ALK(+3.89),AXL(-1.57),CACNA1G(+2.29),CALM1 (includes others)(+1.49),CNGA3(+5.89),CNGB1(+2.89),DDR1(-1.74),DDR2(+4.69),DYRK3(-1.7),EGFR(+2.45),EPHA1(+2.49),EPHA2(-1.74),EPHA5(+3.46),EPHA6(+10.2),EPHB1(+2.81),ERBB3(+2.29),FGFR1(+1.86),FGFR3(-2.34),GUCY1A1(+3.08),GUCY1A2(+1.79),ITPR3(+2.13),JAK3(-1.79),KDR(+2.05),LMTK3(-1.95),MAP2K1(-1.55),MRAS(+1.91),NPPB(-2.63),PDE1C(+1.97),PDE4D(+2.64),PDGFRA(+3.…
Wnt/ beta -catenin Signaling	0.00102814		1.372	0.22	38	32	6	APC2(+1.78),APPL2(+1.69),AXIN2(+3.19),BMPR2(+2.38),BTRC(+1.67),CD44(+3.93),CDH1(+3.1),FRZB(+4.89),FZD1(+1.9),FZD10(+9.97),FZD8(+3.03),GNAO1(+2.29),KREMEN1(+1.85),LEF1(+2.55),POU5F1(+11.76),PPP2R2B(+2.72),PPP2R2C(+2.46),PPP2R3B(-1.59),SFRP1(+3.48),SOX2(-2.72),SOX3(-2.3),SOX8(+2.06),SOX9(+1.56),TGFB3(+5.19),TGFBR2(+2.5),TGFBR3(-1.91),TLE1(+1.74),WIF1(+8.64),WNT1(+3.45),WNT10B(+2.6),WNT2B(+1.89),WNT…
Synaptic Long Term Depression	0.00102814	Activated	3.363	0.214	40	31	9	CACNA1B(-1.83),CACNA1C(+3.21),CACNA1E(+4.04),CACNA1F(-3.83),CACNA1G(+2.29),CACNA2D1(+3.79),CACNA2D3(+5.28),CACNA2D4(+4.85),CACNG4(+1.92),GNAO1(+2.29),GRIA1(+1.96),GRIA2(+6.74),GRIA4(+2.25),GRID1(+2.75),GRID2(+6.81),GRM2(+4.8),GRM5(+3.07),GRM7(+2.77),GUCY1A1(+3.08),GUCY1A2(+1.79),ITPR3(+2.13),MAP2K1(-1.55),MRAS(+1.91),NOS1(+2.43),NOS3(-5.35),NPR3(+2.96),PLA2G3(-3.15),PLCB4(+1.56),PLCD1(-2.04),PLCL…
Molecular Mechanisms of Cancer	0.00147367		NaN	0.168	66	54	12	ADCY1(+3.35),ADCY2(-1.72),ADCY3(+1.72),ADCY8(+3.77),BBC3(-1.77),BMP1(+1.86),BMP3(+3.85),BMP4(+1.85),BMP5(+3.06),BMPR1B(-2.97),BMPR2(+2.38),BRCA1(+1.77),CAMK2B(+3.05),CDC25A(+1.75),CDC25B(+2.16),CDC25C(+1.99),CDH1(+3.1),CDK11A(-1.68),CDK14(+2.15),CDK20(-1.81),CDK6(+2.2),CDKN1A(-2.32),DIABLO(-1.53),E2F1(+2.7),E2F2(+4.11),E2F3(+1.56),FOS(+2.02),FOXO1(+2.33),FZD1(+1.9),FZD10(+9.97),FZD8(+3.03),GNAO1(…
GP6 Signaling Pathway	0.00179994	Activated	5.014	0.242	29	28	1	CALM1 (includes others)(+1.49),COL13A1(+2.88),COL15A1(+2.47),COL16A1(+5.19),COL17A1(+6.4),COL1A1(+3.04),COL21A1(+5.93),COL23A1(+2.5),COL25A1(+3.53),COL26A1(+1.81),COL27A1(+1.86),COL2A1(+1.9),COL3A1(+8.18),COL5A1(+2.19),COL6A2(+1.72),COL8A2(+5.86),COL9A1(+1.52),COL9A2(+2.15),COL9A3(+4.01),ITGB3(-2.06),LAMA2(+4.8),LAMB1(+1.98),LAMB3(+4.06),LAMC3(+4.15),PIK3R1(+2.25),PIK3R3(+1.79),PRKCB(+2.5),PRKCE(…
Regulation of the Epithelial-Mesenchymal Transition Pathway	0.00247875		NaN	0.201	39	30	9	CDH1(+3.1),CLDN3(-2.47),EGFR(+2.45),ETS1(+1.84),FGF1(+2.78),FGF11(-1.98),FGF14(+2.35),FGFR1(+1.86),FGFR3(-2.34),FGFRL1(-1.69),FZD1(+1.9),FZD10(+9.97),FZD8(+3.03),HMGA2(+2.05),JAK3(-1.79),LEF1(+2.55),LOX(+1.9),MAP2K1(-1.55),MMP2(+2.64),MRAS(+1.91),NOTCH1(-1.48),PARD6G(+1.6),PDGFD(+2.28),PIK3R1(+2.25),PIK3R3(+1.79),SNAI1(+2.24),SNAI2(+6.19),TGFB3(+5.19),TGFBR2(+2.5),WNT1(+3.45),WNT10B(+2.6),WNT2B(+…
Role of NANOG in Mammalian Embryonic Stem Cell Pluripotency	0.00302755		0	0.233	28	21	7	BMP1(+1.86),BMP3(+3.85),BMP4(+1.85),BMP5(+3.06),BMPR1B(-2.97),BMPR2(+2.38),FZD1(+1.9),FZD10(+9.97),FZD8(+3.03),JAK3(-1.79),MAP2K1(-1.55),MRAS(+1.91),PIK3R1(+2.25),PIK3R3(+1.79),POU5F1(+11.76),SALL4(-2.67),SMAD9(+2.24),SOX2(-2.72),WNT1(+3.45),WNT10B(+2.6),WNT2B(+1.89),WNT3(+2.2),WNT3A(+1.77),WNT4(+6.53),WNT6(+3.83),WNT7A(-2.36),WNT7B(-2.48),WNT9A(+2.73)
Endocannabinoid Neuronal Synapse Pathway	0.00334597	Activated	2.043	0.227	29	24	5	ADCY1(+3.35),ADCY2(-1.72),ADCY3(+1.72),ADCY8(+3.77),CACNA1B(-1.83),CACNA1C(+3.21),CACNA1E(+4.04),CACNA1F(-3.83),CACNA1G(+2.29),CACNA2D1(+3.79),CACNA2D3(+5.28),CACNA2D4(+4.85),CACNG4(+1.92),CNR1(+8.01),GNAO1(+2.29),GNB3(+2.16),GNG2(+1.65),GRIA1(+1.96),GRIA2(+6.74),GRIA4(+2.25),GRIN2C(-2.81),GRM5(+3.07),KCNJ6(+2.32),PLCB4(+1.56),PLCD1(-2.04),PLCL1(+2.78),PPP3CA(+2.76),PRKACB(+1.84),PRKAR1B(+1.76)
Glioblastoma Multiforme Signaling	0.00408677	Activated	3.528	0.205	34	29	5	CDK6(+2.2),CDKN1A(-2.32),E2F1(+2.7),E2F2(+4.11),E2F3(+1.56),EGFR(+2.45),FOXO1(+2.33),FZD1(+1.9),FZD10(+9.97),FZD8(+3.03),ITPR3(+2.13),LEF1(+2.55),MAP2K1(-1.55),MRAS(+1.91),PDGFD(+2.28),PDGFRA(+3.34),PIK3R1(+2.25),PIK3R3(+1.79),PLCB4(+1.56),PLCD1(-2.04),PLCL1(+2.78),RHOBTB1(+1.57),RHOJ(+6.48),RHOU(+4.21),WNT1(+3.45),WNT10B(+2.6),WNT2B(+1.89),WNT3(+2.2),WNT3A(+1.77),WNT4(+6.53),WNT6(+3.83),WNT7A(-2…
Corticotropin Releasing Hormone Signaling	0.00416933		1.134	0.214	31	24	7	ADCY1(+3.35),ADCY2(-1.72),ADCY3(+1.72),ADCY8(+3.77),CACNA1B(-1.83),CACNA1C(+3.21),CACNA1E(+4.04),CACNA1F(-3.83),CACNA1G(+2.29),CACNA2D1(+3.79),CACNA2D3(+5.28),CACNA2D4(+4.85),CACNG4(+1.92),CALM1 (includes others)(+1.49),CNR1(+8.01),CREB3L4(-2.0),FOS(+2.02),GNAO1(+2.29),GUCY1A1(+3.08),GUCY1A2(+1.79),ITPR3(+2.13),MAP2K1(-1.55),NOS1(+2.43),NOS3(-5.35),NPR3(+2.96),PRKACB(+1.84),PRKAR1B(+1.76),PRKCB(+…
Basal Cell Carcinoma Signaling	0.00433948	Activated	2.673	0.274	20	18	2	APC2(+1.78),BMP1(+1.86),BMP3(+3.85),BMP4(+1.85),BMP5(+3.06),FZD1(+1.9),FZD10(+9.97),FZD8(+3.03),HHIP(+2.74),LEF1(+2.55),WNT1(+3.45),WNT10B(+2.6),WNT2B(+1.89),WNT3(+2.2),WNT3A(+1.77),WNT4(+6.53),WNT6(+3.83),WNT7A(-2.36),WNT7B(-2.48),WNT9A(+2.73)
Opioid Signaling Pathway	0.0043831	Activated	2.287	0.18	45	37	8	ADCY1(+3.35),ADCY2(-1.72),ADCY3(+1.72),ADCY8(+3.77),ARRB1(+2.62),CACNA1B(-1.83),CACNA1C(+3.21),CACNA1E(+4.04),CACNA1F(-3.83),CACNA1G(+2.29),CACNA2D1(+3.79),CACNA2D3(+5.28),CACNA2D4(+4.85),CACNG4(+1.92),CALM1 (includes others)(+1.49),CAMK1D(+1.93),CAMK2B(+3.05),CREB3L4(-2.0),FOS(+2.02),GNAO1(+2.29),GNB3(+2.16),GNG2(+1.65),GRIN2C(-2.81),ITPR3(+2.13),KCNJ6(+2.32),MAP2K1(-1.55),MRAS(+1.91),NOS1(+2.43…
cAMP-mediated signaling	0.00442715	Activated	2.53	0.185	42	37	5	ADCY1(+3.35),ADCY2(-1.72),ADCY3(+1.72),ADCY8(+3.77),AKAP2(+2.04),AKAP6(+1.88),APEX1(+1.71),CALM1 (includes others)(+1.49),CAMK1D(+1.93),CAMK2B(+3.05),CHRM2(+1.92),CHRM3(+2.33),CNGA3(+5.89),CNGB1(+2.89),CNR1(+8.01),CREB3L4(-2.0),DRD4(-3.01),GABBR1(+1.85),GABBR2(+3.43),GNAO1(+2.29),GPR17(+2.78),GRM2(+4.8),GRM7(+2.77),MAP2K1(-1.55),NPR3(+2.96),PDE10A(+1.72),PDE11A(+2.31),PDE1C(+1.97),PDE3A(+5.5),PDE…
GPCR-Mediated Nutrient Sensing in Enteroendocrine Cells	0.00456197	Activated	3.53	0.232	26	22	4	ADCY1(+3.35),ADCY2(-1.72),ADCY3(+1.72),ADCY8(+3.77),CACNA1B(-1.83),CACNA1C(+3.21),CACNA1E(+4.04),CACNA1F(-3.83),CACNA1G(+2.29),CACNA2D1(+3.79),CACNA2D3(+5.28),CACNA2D4(+4.85),CACNG4(+1.92),GNG2(+1.65),GNG3(+2.17),GNG4(+2.26),ITPR3(+2.13),PLCB4(+1.56),PLCD1(-2.04),PLCL1(+2.78),PRKACB(+1.84),PRKAR1B(+1.76),PRKCB(+2.5),PRKCE(+2.15),PRKD1(+2.06),RAPGEF4(+2.61)
Colorectal Cancer Metastasis Signaling	0.00530026	Activated	4.111	0.177	45	39	6	ADCY1(+3.35),ADCY2(-1.72),ADCY3(+1.72),ADCY8(+3.77),ARRB1(+2.62),BIRC5(+2.19),CDH1(+3.1),EGFR(+2.45),FOS(+2.02),FZD1(+1.9),FZD10(+9.97),FZD8(+3.03),GNB3(+2.16),GNG2(+1.65),GNG3(+2.17),GNG4(+2.26),JAK3(-1.79),LEF1(+2.55),MAP2K1(-1.55),MMP16(+2.82),MMP17(+2.55),MMP19(+2.28),MMP2(+2.64),MMP23B(-2.09),MRAS(+1.91),PIK3R1(+2.25),PIK3R3(+1.79),PRKACB(+1.84),PRKAR1B(+1.76),RHOBTB1(+1.57),RHOJ(+6.48),RHOU…
nNOS Signaling in Skeletal Muscle Cells	0.00551656		NaN	0.341	14	11	3	CACNA1B(-1.83),CACNA1C(+3.21),CACNA1E(+4.04),CACNA1F(-3.83),CACNA1G(+2.29),CACNA2D1(+3.79),CACNA2D3(+5.28),CACNA2D4(+4.85),CACNG4(+1.92),CALM1 (includes others)(+1.49),NOS1(+2.43),RYR1(-3.07),RYR2(+2.81),SNTA1(+2.0)
GABA Receptor Signaling	0.0057417		NaN	0.242	23	19	4	ADCY1(+3.35),ADCY2(-1.72),ADCY3(+1.72),ADCY8(+3.77),CACNA1B(-1.83),CACNA1C(+3.21),CACNA1E(+4.04),CACNA1F(-3.83),CACNA1G(+2.29),CACNA2D1(+3.79),CACNA2D3(+5.28),CACNA2D4(+4.85),CACNG4(+1.92),GABBR1(+1.85),GABBR2(+3.43),GABRA3(+2.43),GABRB3(+4.19),GABRE(+2.41),GABRP(+8.82),KCNH2(-1.73),KCNQ2(+2.98),KCNQ3(+8.74),MRAS(+1.91)
Neuropathic Pain Signaling In Dorsal Horn Neurons	0.00591656	Activated	3.674	0.235	24	21	3	CAMK1D(+1.93),CAMK2B(+3.05),FOS(+2.02),GRIA1(+1.96),GRIA2(+6.74),GRIA4(+2.25),GRIN2C(-2.81),GRM2(+4.8),GRM5(+3.07),GRM7(+2.77),ITPR3(+2.13),KCNH2(-1.73),KCNQ2(+2.98),KCNQ3(+8.74),PIK3R1(+2.25),PIK3R3(+1.79),PLCB4(+1.56),PLCD1(-2.04),PLCL1(+2.78),PRKACB(+1.84),PRKAR1B(+1.76),PRKCB(+2.5),PRKCE(+2.15),PRKD1(+2.06)
eNOS Signaling	0.00673795	Activated	4.041	0.2	32	27	5	ADCY1(+3.35),ADCY2(-1.72),ADCY3(+1.72),ADCY8(+3.77),AQP1(+2.14),CALM1 (includes others)(+1.49),CCNA2(+1.74),CHRM2(+1.92),CHRM3(+2.33),CHRNA3(+3.24),CHRNA5(+2.29),CHRNA7(+1.94),CHRNB2(+2.52),CNGA3(+5.89),CNGB1(+2.89),GUCY1A1(+3.08),GUCY1A2(+1.79),HSPA1A/HSPA1B(-1.64),HSPA5(-1.75),ITPR3(+2.13),KDR(+2.05),LPAR3(-2.46),NOS3(-5.35),PIK3R1(+2.25),PIK3R3(+1.79),PRKACB(+1.84),PRKAR1B(+1.76),PRKCB(+2.5),P…
Osteoarthritis Pathway	0.00694315	Activated	2.744	0.183	39	32	7	ADAMTS5(+2.45),AGER(-1.91),ANKH(+1.95),ANXA2(+1.65),BMPR2(+2.38),CCN4(+3.55),COL2A1(+1.9),CREB3L4(-2.0),DCN(+24.15),DDIT4(-1.74),DDR2(+4.69),EPAS1(+2.73),FGFR1(+1.86),FGFR3(-2.34),FN1(+3.0),FRZB(+4.89),FZD1(+1.9),FZD10(+9.97),FZD8(+3.03),GREM1(-1.83),H19(+1.99),HMGB1(+1.72),IL1R1(+1.71),IL1RAPL2(+2.87),ITGA4(+4.92),LEF1(+2.55),MATN3(+5.14),NOTCH1(-1.48),PTH1R(+1.87),S1PR3(+1.97),SIK3(+1.5),SMAD7(…
Role of Osteoblasts, Osteoclasts and Chondrocytes in Rheumatoid Arthritis	0.00701293		NaN	0.181	40	35	5	ACP5(-2.76),ADAMTS5(+2.45),APC2(+1.78),BMP1(+1.86),BMP3(+3.85),BMP4(+1.85),BMP5(+3.06),BMPR2(+2.38),CALM1 (includes others)(+1.49),COL1A1(+3.04),FOS(+2.02),FOXO1(+2.33),FRZB(+4.89),FZD1(+1.9),FZD10(+9.97),FZD8(+3.03),IL1R1(+1.71),IL1RAPL2(+2.87),ITGB3(-2.06),LEF1(+2.55),MAP3K5(+3.69),NFATC2(+2.1),PIK3R1(+2.25),PIK3R3(+1.79),PPP3CA(+2.76),SFRP1(+3.48),SMAD9(+2.24),SOST(+3.32),SPP1(-3.22),WIF1(+8.6…
Cardiac Hypertrophy Signaling (Enhanced)	0.0072265	Activated	5.02	0.148	72	55	17	ADCY1(+3.35),ADCY2(-1.72),ADCY3(+1.72),ADCY8(+3.77),APEX1(+1.71),BMPR2(+2.38),CACNA1C(+3.21),CACNA1E(+4.04),CALM1 (includes others)(+1.49),CAMK2B(+3.05),DIAPH3(+1.93),EDNRA(+9.03),EDNRB(-4.04),FGF1(+2.78),FGF11(-1.98),FGF14(+2.35),FGFR1(+1.86),FGFR3(-2.34),FGFRL1(-1.69),FZD1(+1.9),FZD10(+9.97),FZD8(+3.03),GNB3(+2.16),GNG2(+1.65),HDAC6(-1.75),IL13RA1(+1.55),IL1R1(+1.71),INPP5F(-1.84),ITGA4(+4.92),…
Ovarian Cancer Signaling	0.00752142	Activated	2.714	0.207	29	25	4	ARRB1(+2.62),BRCA1(+1.77),CD44(+3.93),E2F1(+2.7),EDNRA(+9.03),EGFR(+2.45),FZD1(+1.9),FZD10(+9.97),FZD8(+3.03),LEF1(+2.55),MAP2K1(-1.55),MMP2(+2.64),MRAS(+1.91),PIK3R1(+2.25),PIK3R3(+1.79),PRKACB(+1.84),PRKAR1B(+1.76),PTGS1(-2.59),VEGFC(+2.34),WNT1(+3.45),WNT10B(+2.6),WNT2B(+1.89),WNT3(+2.2),WNT3A(+1.77),WNT4(+6.53),WNT6(+3.83),WNT7A(-2.36),WNT7B(-2.48),WNT9A(+2.73)
Calcium Signaling	0.0104621	Activated	3.286	0.18	37	26	11	CACNA1B(-1.83),CACNA1C(+3.21),CACNA1E(+4.04),CACNA1F(-3.83),CACNA1G(+2.29),CACNA2D1(+3.79),CACNA2D3(+5.28),CACNA2D4(+4.85),CACNG4(+1.92),CALM1 (includes others)(+1.49),CAMK1D(+1.93),CAMK2B(+3.05),CAMKK2(+2.21),CHRNA3(+3.24),CHRNA5(+2.29),CHRNA7(+1.94),CHRNB2(+2.52),CREB3L4(-2.0),GRIA1(+1.96),GRIA2(+6.74),GRIA4(+2.25),GRIN2C(-2.81),HDAC6(-1.75),ITPR3(+2.13),MYL7(-2.43),NFATC2(+2.1),PNCK(-2.09),PPP…
Role of NFAT in Cardiac Hypertrophy	0.0109985	Activated	3.888	0.177	38	32	6	ADCY1(+3.35),ADCY2(-1.72),ADCY3(+1.72),ADCY8(+3.77),CACNA1B(-1.83),CACNA1C(+3.21),CACNA1E(+4.04),CACNA1F(-3.83),CACNA1G(+2.29),CACNA2D1(+3.79),CACNA2D3(+5.28),CACNA2D4(+4.85),CACNG4(+1.92),CALM1 (includes others)(+1.49),CAMK1D(+1.93),CAMK2B(+3.05),GNB3(+2.16),GNG2(+1.65),GNG3(+2.17),GNG4(+2.26),HDAC6(-1.75),ITPR3(+2.13),MAP2K1(-1.55),MRAS(+1.91),PIK3R1(+2.25),PIK3R3(+1.79),PLCB4(+1.56),PLCD1(-2.0…
GNRH Signaling	0.0137049	Activated	3.411	0.185	32	27	5	ADCY1(+3.35),ADCY2(-1.72),ADCY3(+1.72),ADCY8(+3.77),CACNA1B(-1.83),CACNA1C(+3.21),CACNA1E(+4.04),CACNA1F(-3.83),CACNA1G(+2.29),CACNA2D1(+3.79),CACNA2D3(+5.28),CACNA2D4(+4.85),CACNG4(+1.92),CALM1 (includes others)(+1.49),CAMK2B(+3.05),CREB3L4(-2.0),EGFR(+2.45),FOS(+2.02),GNB3(+2.16),GNG2(+1.65),ITPR3(+2.13),MAP2K1(-1.55),MAP3K5(+3.69),MMP2(+2.64),MRAS(+1.91),PAK5(+2.3),PLCB4(+1.56),PRKACB(+1.84),P…
IL-15 Production	0.0138427		NaN	0.207	25	16	9	ALK(+3.89),AXL(-1.57),DDR1(-1.74),DDR2(+4.69),DYRK3(-1.7),EGFR(+2.45),EPHA1(+2.49),EPHA2(-1.74),EPHA5(+3.46),EPHA6(+10.2),EPHB1(+2.81),ERBB3(+2.29),FGFR1(+1.86),FGFR3(-2.34),IRF1(+1.72),JAK3(-1.79),KDR(+2.05),LMTK3(-1.95),MAP2K1(-1.55),PDGFRA(+3.34),PEAK1(+1.79),RET(+2.45),ROR1(+2.54),ROR2(+2.36),TIE1(-5.72)
Factors Promoting Cardiogenesis in Vertebrates	0.0138427		NaN	0.226	21	18	3	BMP1(+1.86),BMP3(+3.85),BMP4(+1.85),BMP5(+3.06),BMPR1B(-2.97),BMPR2(+2.38),CDC6(+2.07),FZD1(+1.9),FZD10(+9.97),FZD8(+3.03),LEF1(+2.55),NPPB(-2.63),PRKCB(+2.5),PRKCE(+2.15),PRKD1(+2.06),SMAD9(+2.24),TDGF1(+5.05),TGFB3(+5.19),TGFBR2(+2.5),TGFBR3(-1.91),WNT3(+2.2)
G alpha s Signaling	0.0139818	Activated	2.065	0.215	23	19	4	ADCY1(+3.35),ADCY2(-1.72),ADCY3(+1.72),ADCY8(+3.77),ADD2(+2.03),CHRM3(+2.33),CNGA3(+5.89),CNGB1(+2.89),CNR1(+8.01),CREB3L4(-2.0),GNB3(+2.16),GNG2(+1.65),GNG3(+2.17),GNG4(+2.26),MAP2K1(-1.55),MRAS(+1.91),PRKACB(+1.84),PRKAR1B(+1.76),PTH1R(+1.87),RAPGEF4(+2.61),RYR1(-3.07),RYR2(+2.81),VIPR2(+4.49)
Role of Macrophages, Fibroblasts and Endothelial Cells in Rheumatoid Arthritis	0.0154523		NaN	0.157	49	42	7	APC2(+1.78),CALM1 (includes others)(+1.49),CAMK2B(+3.05),CCL2(+2.16),CEBPD(+2.36),CREB3L4(-2.0),FN1(+3.0),FOS(+2.02),FRZB(+4.89),FZD1(+1.9),FZD10(+9.97),FZD8(+3.03),GNAO1(+2.29),ICAM1(-2.26),IL1R1(+1.71),IL1RAPL2(+2.87),LEF1(+2.55),MAP2K1(-1.55),MRAS(+1.91),NFATC2(+2.1),PDGFD(+2.28),PIK3R1(+2.25),PIK3R3(+1.79),PLCB4(+1.56),PLCD1(-2.04),PLCL1(+2.78),PPP3CA(+2.76),PRKCB(+2.5),PRKCE(+2.15),PRKD1(+2.…
Cellular Effects of Sildenafil (Viagra)	0.0162445		NaN	0.198	26	21	5	ADCY1(+3.35),ADCY2(-1.72),ADCY3(+1.72),ADCY8(+3.77),CACNA1C(+3.21),CACNA1E(+4.04),CACNG4(+1.92),CALM1 (includes others)(+1.49),GUCY1A1(+3.08),GUCY1A2(+1.79),ITPR3(+2.13),KCNH2(-1.73),KCNQ2(+2.98),KCNQ3(+8.74),MYL7(-2.43),NOS3(-5.35),PDE1C(+1.97),PDE3A(+5.5),PDE4D(+2.64),PLCB4(+1.56),PLCD1(-2.04),PLCL1(+2.78),PRKACB(+1.84),PRKAR1B(+1.76),PRKG1(+3.44),SLC4A10(+3.72)
Superpathway of Cholesterol Biosynthesis	0.017249	Inhibited	-3.162	0.357	10	0	10	CYP51A1(-1.69),DHCR7(-1.88),FDFT1(-2.01),FDPS(-1.71),HMGCR(-2.13),HMGCS1(-2.27),HSD17B7(-2.16),IDI1(-2.27),MSMO1(-2.26),SQLE(-1.72)
G alpha i Signaling	0.0175975		0.626	0.2	25	22	3	ADCY1(+3.35),ADCY2(-1.72),ADCY3(+1.72),ADCY8(+3.77),CHRM2(+1.92),CNR1(+8.01),DRD4(-3.01),GABBR1(+1.85),GABBR2(+3.43),GNB3(+2.16),GNG2(+1.65),GNG3(+2.17),GNG4(+2.26),GPR17(+2.78),GRM2(+4.8),GRM7(+2.77),MRAS(+1.91),NPR3(+2.96),PRKACB(+1.84),PRKAR1B(+1.76),RGS12(+2.1),RGS4(+5.61),RGS7(+4.3),S1PR1(-2.26),S1PR3(+1.97)
Dopamine-DARPP32 Feedback in cAMP Signaling	0.017953	Activated	3.272	0.184	30	23	7	ADCY1(+3.35),ADCY2(-1.72),ADCY3(+1.72),ADCY8(+3.77),CACNA1C(+3.21),CACNA1E(+4.04),CALM1 (includes others)(+1.49),CALY(-2.89),CAMKK2(+2.21),CREB3L4(-2.0),DRD4(-3.01),GRIN2C(-2.81),GUCY1A1(+3.08),GUCY1A2(+1.79),ITPR3(+2.13),KCNJ6(+2.32),NOS1(+2.43),PLCB4(+1.56),PLCD1(-2.04),PLCL1(+2.78),PPP2R2B(+2.72),PPP2R2C(+2.46),PPP2R3B(-1.59),PPP3CA(+2.76),PRKACB(+1.84),PRKAR1B(+1.76),PRKCB(+2.5),PRKCE(+2.15),…
Protein Kinase A Signaling	0.0204453	Activated	2.143	0.145	58	48	10	ADCY1(+3.35),ADCY2(-1.72),ADCY3(+1.72),ADCY8(+3.77),ADD2(+2.03),AKAP2(+2.04),AKAP6(+1.88),APEX1(+1.71),CALM1 (includes others)(+1.49),CAMK2B(+3.05),CDC25A(+1.75),CDC25B(+2.16),CDC25C(+1.99),CNGA3(+5.89),CNGB1(+2.89),CREB3L4(-2.0),GNB3(+2.16),GNG2(+1.65),GNG3(+2.17),GNG4(+2.26),H1F0(-1.98),HIST1H1B(+2.94),HIST2H3C(+2.91),ITPR3(+2.13),KDELR2(-1.62),LEF1(+2.55),MAP2K1(-1.55),MYL7(-2.43),NFATC2(+2.1)…
Type II Diabetes Mellitus Signaling	0.0208584	Activated	3.162	0.189	27	19	8	ABCC8(+4.12),ACSBG1(-3.4),ACSL3(-1.86),ADIPOR1(-1.58),CACNA1B(-1.83),CACNA1C(+3.21),CACNA1E(+4.04),CACNA1F(-3.83),CACNA1G(+2.29),CACNA2D1(+3.79),CACNA2D3(+5.28),CACNA2D4(+4.85),CACNG4(+1.92),IRS4(-3.01),MAP3K5(+3.69),NSMAF(+1.75),PIK3R1(+2.25),PIK3R3(+1.79),PKM(+1.93),PRKCB(+2.5),PRKCE(+2.15),PRKD1(+2.06),SLC27A2(-2.29),SLC2A4(-2.3),SOCS1(+3.16),SOCS2(+3.94),SOCS3(+2.95)
G-Protein Coupled Receptor Signaling	0.0214936		NaN	0.158	43	38	5	ADCY1(+3.35),ADCY2(-1.72),ADCY3(+1.72),ADCY8(+3.77),APEX1(+1.71),CAMK2B(+3.05),CHRM2(+1.92),CHRM3(+2.33),CNR1(+8.01),CREB3L4(-2.0),DRD4(-3.01),GABBR1(+1.85),GABBR2(+3.43),GNAO1(+2.29),GPR17(+2.78),GRM2(+4.8),GRM5(+3.07),GRM7(+2.77),HTR2A(+3.27),MAP2K1(-1.55),MRAS(+1.91),NPR3(+2.96),PDE10A(+1.72),PDE11A(+2.31),PDE1C(+1.97),PDE3A(+5.5),PDE4D(+2.64),PIK3R1(+2.25),PIK3R3(+1.79),PLCB4(+1.56),PRKACB(+1…
Synaptic Long Term Potentiation	0.0221482	Activated	3.266	0.194	25	21	4	ADCY1(+3.35),ADCY8(+3.77),CACNA1C(+3.21),CALM1 (includes others)(+1.49),CAMK2B(+3.05),CREB3L4(-2.0),GRIA1(+1.96),GRIA2(+6.74),GRIA4(+2.25),GRIN2C(-2.81),GRM2(+4.8),GRM5(+3.07),GRM7(+2.77),ITPR3(+2.13),MAP2K1(-1.55),MRAS(+1.91),PLCB4(+1.56),PLCD1(-2.04),PLCL1(+2.78),PPP3CA(+2.76),PRKACB(+1.84),PRKAR1B(+1.76),PRKCB(+2.5),PRKCE(+2.15),PRKD1(+2.06)
G Beta Gamma Signaling	0.0225956	Activated	3.266	0.197	24	21	3	ADCY1(+3.35),ADCY2(-1.72),CACNA1B(-1.83),CACNA1C(+3.21),CACNA1E(+4.04),CACNA1F(-3.83),CACNA1G(+2.29),CACNA2D1(+3.79),CACNA2D3(+5.28),CACNA2D4(+4.85),CACNG4(+1.92),EGFR(+2.45),GNAO1(+2.29),GNB3(+2.16),GNG2(+1.65),GNG3(+2.17),GNG4(+2.26),KCNJ6(+2.32),MRAS(+1.91),PRKACB(+1.84),PRKAR1B(+1.76),PRKCB(+2.5),PRKCE(+2.15),PRKD1(+2.06)
PCP pathway	0.0257325	Activated	2.324	0.246	15	13	2	FZD1(+1.9),FZD10(+9.97),FZD8(+3.03),PRICKLE1(+7.39),ROR2(+2.36),WNT1(+3.45),WNT10B(+2.6),WNT2B(+1.89),WNT3(+2.2),WNT3A(+1.77),WNT4(+6.53),WNT6(+3.83),WNT7A(-2.36),WNT7B(-2.48),WNT9A(+2.73)
Cardiac beta -adrenergic Signaling	0.0265162	Activated	2.524	0.186	26	24	2	ADCY1(+3.35),ADCY2(-1.72),ADCY3(+1.72),ADCY8(+3.77),AKAP2(+2.04),AKAP6(+1.88),APEX1(+1.71),CACNA1C(+3.21),CACNA1E(+4.04),GNB3(+2.16),GNG2(+1.65),GNG3(+2.17),GNG4(+2.26),MRAS(+1.91),PDE10A(+1.72),PDE11A(+2.31),PDE1C(+1.97),PDE3A(+5.5),PDE4D(+2.64),PKIA(+1.77),PPP2R2B(+2.72),PPP2R2C(+2.46),PPP2R3B(-1.59),PRKACB(+1.84),PRKAR1B(+1.76),RYR2(+2.81)
Relaxin Signaling	0.0295994	Activated	2.668	0.18	27	23	4	ADCY1(+3.35),ADCY2(-1.72),ADCY3(+1.72),ADCY8(+3.77),APEX1(+1.71),FOS(+2.02),GNAO1(+2.29),GNB3(+2.16),GNG2(+1.65),GNG3(+2.17),GNG4(+2.26),GUCY1A1(+3.08),GUCY1A2(+1.79),MAP2K1(-1.55),MRAS(+1.91),NOS3(-5.35),NPR3(+2.96),PDE10A(+1.72),PDE11A(+2.31),PDE1C(+1.97),PDE3A(+5.5),PDE4D(+2.64),PIK3R1(+2.25),PIK3R3(+1.79),PRKACB(+1.84),PRKAR1B(+1.76),SLC39A7(-1.46)
HER-2 Signaling in Breast Cancer	0.0337087		NaN	0.212	18	16	2	CDK6(+2.2),CDKN1A(-2.32),EGFR(+2.45),ERBB3(+2.29),FOXO1(+2.33),ITGB3(-2.06),ITGB4(+1.99),ITGB5(+1.71),MAP3K5(+3.69),MMP2(+2.64),MRAS(+1.91),NRG1(+2.27),PARD6G(+1.6),PIK3R1(+2.25),PIK3R3(+1.79),PRKCB(+2.5),PRKCE(+2.15),PRKD1(+2.06)
Nitric Oxide Signaling in the Cardiovascular System	0.0347353	Activated	3.441	0.2	20	18	2	CACNA1C(+3.21),CACNA1E(+4.04),CALM1 (includes others)(+1.49),GUCY1A1(+3.08),GUCY1A2(+1.79),ITPR3(+2.13),KDR(+2.05),MAP2K1(-1.55),NOS3(-5.35),PDE1C(+1.97),PIK3R1(+2.25),PIK3R3(+1.79),PRKACB(+1.84),PRKAR1B(+1.76),PRKCB(+2.5),PRKCE(+2.15),PRKD1(+2.06),PRKG1(+3.44),RYR2(+2.81),VEGFC(+2.34)
Cholesterol Biosynthesis I	0.0361528	Inhibited	-2.449	0.462	6	0	6	CYP51A1(-1.69),DHCR7(-1.88),FDFT1(-2.01),HSD17B7(-2.16),MSMO1(-2.26),SQLE(-1.72)
Cholesterol Biosynthesis II (via 24,25-dihydrolanosterol)	0.0361528	Inhibited	-2.449	0.462	6	0	6	CYP51A1(-1.69),DHCR7(-1.88),FDFT1(-2.01),HSD17B7(-2.16),MSMO1(-2.26),SQLE(-1.72)
Cholesterol Biosynthesis III (via Desmosterol)	0.0361528	Inhibited	-2.449	0.462	6	0	6	CYP51A1(-1.69),DHCR7(-1.88),FDFT1(-2.01),HSD17B7(-2.16),MSMO1(-2.26),SQLE(-1.72)
CCR5 Signaling in Macrophages	0.0376283	Activated	2.449	0.202	19	17	2	CACNA1B(-1.83),CACNA1C(+3.21),CACNA1E(+4.04),CACNA1F(-3.83),CACNA1G(+2.29),CACNA2D1(+3.79),CACNA2D3(+5.28),CACNA2D4(+4.85),CACNG4(+1.92),CALM1 (includes others)(+1.49),FOS(+2.02),GNB3(+2.16),GNG2(+1.65),GNG3(+2.17),GNG4(+2.26),MRAS(+1.91),PRKCB(+2.5),PRKCE(+2.15),PRKD1(+2.06)
Adipogenesis pathway	0.0424257		NaN	0.179	24	16	8	BMP4(+1.85),BMPR2(+2.38),BSCL2(-1.53),CEBPD(+2.36),DDIT3(-2.04),EBF1(+17.28),FGF1(+2.78),FGFR1(+1.86),FGFR3(-2.34),FGFRL1(-1.69),FOXO1(+2.33),FZD1(+1.9),FZD10(+9.97),FZD8(+3.03),HDAC6(-1.75),KLF3(+1.55),LPL(-2.98),NR2F2(-2.13),RBP1(+2.01),RUNX1T1(+9.33),SLC2A4(-2.3),SMAD9(+2.24),SOX9(+1.56),WNT10B(+2.6)
P2Y Purigenic Receptor Signaling Pathway	0.0464212	Activated	2.683	0.18	23	18	5	ADCY1(+3.35),ADCY2(-1.72),ADCY3(+1.72),ADCY8(+3.77),CREB3L4(-2.0),FOS(+2.02),GNB3(+2.16),GNG2(+1.65),GNG3(+2.17),GNG4(+2.26),ITGB3(-2.06),MAP2K1(-1.55),MRAS(+1.91),PIK3R1(+2.25),PIK3R3(+1.79),PLCB4(+1.56),PLCD1(-2.04),PLCL1(+2.78),PRKACB(+1.84),PRKAR1B(+1.76),PRKCB(+2.5),PRKCE(+2.15),PRKD1(+2.06)
Amyotrophic Lateral Sclerosis Signaling	0.0473589	Activated	2.5	0.194	19	18	1	CACNA1C(+3.21),CACNA1E(+4.04),CAPN1(+1.7),GRIA1(+1.96),GRIA2(+6.74),GRIA4(+2.25),GRID1(+2.75),GRID2(+6.81),GRIK2(+4.11),GRIK3(+4.73),GRIN2C(-2.81),HECW1(+5.63),NEFM(+3.6),NOS1(+2.43),PIK3R1(+2.25),PIK3R3(+1.79),PPP3CA(+2.76),SLC1A2(+5.56),VEGFC(+2.34)

## Sheet: Regulator
Type	Regulator	p	FC	State	Z	N	Pos	Neg	Molecules
transporter	MFSD2A	8.35e-08	-6.785	Activated	3.45	12	0	12	ALDOC(-3.65),CYP51A1(-1.69),DHCR7(-1.88),FADS1(-1.71),FADS2(-1.92),FDFT1(-2.01),IDI1(-2.27),INSIG1(-2.21),LDLR(-1.85),SCD(-2.76),SREBF2(-1.62),STARD4(-2.18)
transporter	ATP7B	4.25e-06		Inhibited	-2.673	14	4	10	CYP51A1(-1.69),FABP5(+2.52),FDFT1(-2.01),FDPS(-1.71),H19(+1.99),HMGCR(-2.13),HMGCS1(-2.27),IDI1(-2.27),LDLR(-1.85),MSMO1(-2.26),SHCBP1(+2.29),SQLE(-1.72),SREBF2(-1.62),TRIP13(+1.95)
transporter	LDLR	1.22e-05	-1.85		0.447	40	23	17	ALCAM(+3.09),ASPN(+14.68),AXIN2(+3.19),BIRC5(+2.19),BUB1B(+1.96),CCL2(+2.16),CCNA2(+1.74),CCNB1(+1.58),CDC25B(+2.16),CDCA3(+1.93),CDKN1A(-2.32),CENPA(+2.09),CENPF(+1.71),CTSC(+2.16),DDIT3(-2.04),ENPP4(-3.48),FABP5(+2.52),FADS2(-1.92),FDPS(-1.71),FOXM1(+2.16),GPR132(-3.23),HELLS(+1.95),HMGCR(-2.13),HSPA5(-1.75),ICAM1(-2.26),ITGB3(-2.06),KIF20A(+1.86),KNL1(+2.04),LDLR(-1.85),LPL(-2.98),MKI67(+2.36)…
transporter	GJA1	7.23e-05			0.403	11	7	4	BMP4(+1.85),CCL2(+2.16),CCN3(+4.98),CDH1(+3.1),CDKN1A(-2.32),FGFR3(-2.34),FOXO1(+2.33),ICAM1(-2.26),MBP(+2.44),SKP2(+1.87),SPP1(-3.22)
transporter	ITGB1BP1	0.000111			-0.169	5	2	3	CDKN1A(-2.32),DLL1(-2.54),HES5(-2.3),HEY1(+2.26),HEY2(+4.4)
transporter	SYVN1	0.00021	-1.519		0.784	26	15	11	ABCC4(-2.19),ACSL3(-1.86),ADAM9(-1.69),AHR(+3.68),ASF1B(+1.88),AXL(-1.57),CALM1 (includes others)(+1.49),CD44(+3.93),CTPS1(+1.63),CYP1B1(+2.61),DAB2(+1.76),DPYD(+2.12),EPHA2(-1.74),GGCX(-1.59),GPRC5A(+1.9),HERC5(-3.42),IFI44(+4.26),ITGB4(+1.99),LMBRD2(-1.79),NDFIP2(-1.91),PPP1R15B(-1.73),SCARA3(+3.58),SKIV2L(-1.49),SLC7A2(+7.1),TFRC(+1.88),ZC3HAV1(+1.86)
transporter	APOE	0.000512			-0.931	48	32	16	ADAMTS5(+2.45),ADGRB1(+2.1),ADGRG1(-1.62),AGER(-1.91),BMP4(+1.85),CD44(+3.93),COL1A1(+3.04),CTDSP1(+2.19),CTSV(+2.48),DAPK3(-1.54),DDIT3(-2.04),EMILIN1(+5.93),FOS(+2.02),GRIA1(+1.96),GRIA2(+6.74),HERPUD1(-1.74),HMGCR(-2.13),HSPA1A/HSPA1B(-1.64),HSPA5(-1.75),ICAM1(-2.26),INSM2(+5.63),KREMEN1(+1.85),LDLR(-1.85),LIPA(-2.07),LPL(-2.98),LTBP1(+2.43),LTBP2(+1.8),MAPT(+3.09),MMP2(+2.64),MYLIP(+2.04),MYO…
transporter	A2M	0.000514	4.051		-0.414	12	8	4	CDH1(+3.1),DDIT3(-2.04),EIF2AK3(-2.83),FOXO1(+2.33),GAP43(+4.63),HSPA5(-1.75),MAP3K5(+3.69),PRLR(+2.46),SLC40A1(+4.69),SREBF2(-1.62),WNT1(+3.45),WNT10B(+2.6)
transporter	TFRC	0.00113	1.881		0.434	17	7	10	ADGRG1(-1.62),ANXA2(+1.65),ATF5(+2.66),BBC3(-1.77),BNIP3(-1.92),CCNA2(+1.74),CCNB1(+1.58),CDKN1A(-2.32),DDIT3(-2.04),DDIT4(-1.74),FOS(+2.02),FTL(-2.22),HERPUD1(-1.74),HSPA5(-1.75),PTN(+2.21),STC2(-2.04),TGFB3(+5.19)
transporter	CEACAM1	0.00251			0	10	5	5	ANG(-3.03),ANGPT1(+5.6),CXCR4(+2.78),DLL1(-2.54),HEY1(+2.26),ICAM1(-2.26),KDR(+2.05),MICA(-3.72),TIE1(-5.72),VEGFC(+2.34)
transporter	ANKH	0.00279	1.951			3	2	1	COL2A1(+1.9),SOX9(+1.56),SPP1(-3.22)
transporter	SLC6A3	0.00398			-1.067	6	5	1	ADCY1(+3.35),CDK5R1(+2.97),CHRNA7(+1.94),GRIA1(+1.96),PSAP(-1.61),TH(+10.96)
transporter	NPC1	0.00431	-2.235		-0.912	16	4	12	CYP27B1(-2.51),CYP51A1(-1.69),DDIT3(-2.04),HMGCR(-2.13),HMGCS1(-2.27),IDI1(-2.27),KLF4(+1.98),LDLR(-1.85),LIPA(-2.07),LPL(-2.98),MCM2(+2.05),MYLIP(+2.04),NPC1(-2.23),PCSK9(+6.83),SCD(-2.76),SREBF2(-1.62)
transporter	NPC1L1	0.0059			1	4	1	3	FOXO1(+2.33),HMGCR(-2.13),HMGCS1(-2.27),SREBF2(-1.62)
transporter	NRXN1	0.00664	7.42			8	7	1	FBLN5(+3.95),LHX5(-1.77),LMX1B(+7.02),NCAN(+2.56),ONECUT2(+5.57),SLC1A3(+5.03),SOX9(+1.56),TNC(+2.03)
transporter	NSF	0.00826				2	1	1	GRIA2(+6.74),SLC2A4(-2.3)
transporter	ATP1A1	0.00826				2	0	2	HMGCR(-2.13),LDLR(-1.85)
transporter	OSBPL8	0.0115		Inhibited	-2.185	5	0	5	DDIT3(-2.04),EIF2AK3(-2.83),HMGCR(-2.13),HSPA5(-1.75),SREBF2(-1.62)
transporter	PLN	0.0118				12	7	5	ADAM9(-1.69),ALDOA(-1.51),ANXA2(+1.65),DLL1(-2.54),DLL3(+3.98),HEY2(+4.4),NOTCH1(-1.48),PGK1(-1.73),PRKCB(+2.5),PRKCE(+2.15),RYR2(+2.81),SPTB(+2.43)
transporter	STX2	0.0121				3	3	0	BMP4(+1.85),MMP2(+2.64),SMAD7(+1.75)
transporter	ALB	0.0159			-1.109	9	3	6	CCL2(+2.16),CDKN1A(-2.32),CDKN1C(-1.78),COL1A1(+3.04),DDIT3(-2.04),EDNRA(+9.03),EDNRB(-4.04),HSPA5(-1.75),SCD(-2.76)
transporter	LRP2	0.0198				3	3	0	BMP4(+1.85),DAB2(+1.76),MSX1(+6.43)
transporter	COMMD1	0.0219			1.633	6	1	5	ALDOA(-1.51),BNIP3(-1.92),DDIT4(-1.74),PGK1(-1.73),STC2(-2.04),TFRC(+1.88)
transporter	GC	0.0233				2	1	1	CYP24A1(+8.89),CYP27B1(-2.51)
transporter	SFTPA1	0.0253			-1.732	13	13	0	COL1A1(+3.04),CYP1B1(+2.61),FOS(+2.02),FRMD6(+1.78),FZD8(+3.03),GABRP(+8.82),GUCY1A1(+3.08),KLF2(+3.29),LOX(+1.9),PHLDA1(+1.75),SH3PXD2A(+2.5),ST3GAL1(+1.82),TH(+10.96)
transporter	ECM1	0.0411			0.913	4	4	0	CDH1(+3.1),POU5F1(+11.76),SNAI1(+2.24),SNAI2(+6.19)
transporter	AKAP12	0.0415				3	3	0	ANGPT1(+5.6),CDH1(+3.1),MMP2(+2.64)
transporter	SLC18A2	0.0415				3	2	1	ADCY1(+3.35),PSAP(-1.61),TH(+10.96)
transporter	TFR2	0.0415				3	1	2	EPOR(-2.66),GDF15(-5.46),SLC40A1(+4.69)
transporter	PDYN	0.0415				3	3	0	GRM5(+3.07),KDR(+2.05),NRP1(+1.9)
transporter	SLC13A5	0.0437				2	1	1	CCNB1(+1.58),CDKN1A(-2.32)
transporter	ATP2A1	0.0437				2	0	2	DDIT3(-2.04),HSPA5(-1.75)
transmembrane receptor	ITGB1	1.29e-08			-0.264	35	27	8	ADAMTS5(+2.45),BMP1(+1.86),BMPR1B(-2.97),CCL2(+2.16),CCN4(+3.55),CDH1(+3.1),CDKN1A(-2.32),COL1A1(+3.04),COL27A1(+1.86),FGF1(+2.78),FGFR3(-2.34),FN1(+3.0),FOS(+2.02),GAS1(+3.38),HAS3(+1.94),ICAM1(-2.26),ITGA9(+2.27),ITGB3(-2.06),ITGB4(+1.99),LAMB1(+1.98),LOX(+1.9),LOXL1(+1.92),LTBP3(+2.15),MMP19(+2.28),MMP2(+2.64),NPPB(-2.63),OLFML3(+3.96),OTOG(+5.81),PAPPA(+1.92),PLAU(-2.34),RELN(+1.99),ROBO1(+2.…
transmembrane receptor	PLAUR	0.000153			-0.773	12	8	4	ANG(-3.03),CCL2(+2.16),CDH1(+3.1),E2F1(+2.7),EIF2AK3(-2.83),ITGB3(-2.06),KDR(+2.05),MMP2(+2.64),PLAU(-2.34),SCN2A(+6.01),SNAI1(+2.24),SOCS1(+3.16)
transmembrane receptor	ITGAV	0.00024			0.114	11	7	4	CDH1(+3.1),CDKN1A(-2.32),COL1A1(+3.04),FN1(+3.0),FOS(+2.02),HAS2(+4.55),ITGB3(-2.06),LDLR(-1.85),MMP2(+2.64),PLAU(-2.34),SOST(+3.32)
transmembrane receptor	IL31RA	0.000316			1.987	4	4	0	CISH(+2.15),SOCS1(+3.16),SOCS2(+3.94),SOCS3(+2.95)
transmembrane receptor	ITGB3	0.000372	-2.064		1.014	16	12	4	COL1A1(+3.04),FN1(+3.0),FOS(+2.02),HAS2(+4.55),ITGB3(-2.06),ITGB5(+1.71),KDR(+2.05),LDLR(-1.85),MMP2(+2.64),NPPB(-2.63),PLAU(-2.34),RUNX1(+5.8),SMAD7(+1.75),SNAI2(+6.19),SOST(+3.32),TGFBR2(+2.5)
transmembrane receptor	OLR1	0.000787			-0.353	12	8	4	CCL2(+2.16),FN1(+3.0),HAS2(+4.55),HAS3(+1.94),ICAM1(-2.26),NOS3(-5.35),RBP1(+2.01),RXRG(+4.68),SPP1(-3.22),STRA6(+2.0),TGFBR2(+2.5),TGFBR3(-1.91)
transmembrane receptor	EDNRA	0.00136	9.033		0.447	6	4	2	COL1A1(+3.04),COL3A1(+8.18),FOS(+2.02),ICAM1(-2.26),MMP2(+2.64),PTGS1(-2.59)
transmembrane receptor	ENG	0.00251			1.424	10	7	3	CXCR4(+2.78),FN1(+3.0),H2AFX(+1.72),ITGB3(-2.06),KDR(+2.05),MMP19(+2.28),NOS3(-5.35),PLAU(-2.34),SMAD7(+1.75),TGFBR2(+2.5)
transmembrane receptor	LGR4	0.00305			0.799	10	7	3	AHR(+3.68),AXIN2(+3.19),CDH1(+3.1),CYP2E1(-2.25),LEF1(+2.55),NR3C2(-2.48),SLC1A2(+5.56),SNAI1(+2.24),WNT4(+6.53),WNT7A(-2.36)
transmembrane receptor	CAV1	0.00459			0.4	23	15	8	ADGRG2(+3.87),CDH1(+3.1),CDKN1A(-2.32),FOS(+2.02),ICAM1(-2.26),INHBA(+3.11),INHBB(+5.09),KDR(+2.05),NEDD4L(+1.95),NOS3(-5.35),NOTCH1(-1.48),NR3C2(-2.48),POU5F1(+11.76),PRLR(+2.46),SKIL(+1.48),SLC25A12(+1.56),SLC7A2(+7.1),SNAI1(+2.24),SOX2(-2.72),SRP54(-2.54),ST6GAL1(+1.6),WFDC2(-3.37),WNT6(+3.83)
transmembrane receptor	DAG1	0.00537		Activated	2.2	6	6	0	EGFLAM(+7.09),LAMB1(+1.98),NOS1(+2.43),SGCD(+4.38),SNTA1(+2.0),SSPN(+1.88)
transmembrane receptor	SFRP2	0.00651				3	3	0	MMP2(+2.64),SNAI2(+6.19),WNT1(+3.45)
transmembrane receptor	SFRP1	0.00724	3.485		-0.913	11	7	4	CDH1(+3.1),COL1A1(+3.04),FN1(+3.0),MLXIPL(-4.26),MMP2(+2.64),PRLR(+2.46),SCD(-2.76),SFRP1(+3.48),SLC2A4(-2.3),SOX9(+1.56),TTYH1(-1.97)
transmembrane receptor	F3	0.00758		Activated	2.741	13	12	1	ANGPT1(+5.6),BRINP3(+6.4),CCL2(+2.16),DOCK4(+2.36),FOS(+2.02),HMGA2(+2.05),ICAM1(-2.26),LAMB1(+1.98),LEF1(+2.55),MMP2(+2.64),SPRY4(+3.22),TGFBR2(+2.5),UBASH3B(+1.82)
transmembrane receptor	IL6R	0.00799			1.105	14	11	3	A2M(+4.05),CCL2(+2.16),CDKN1A(-2.32),COL1A1(+3.04),COL2A1(+1.9),FN1(+3.0),GREM1(-1.83),ICAM1(-2.26),IGFBP5(+2.03),IRF1(+1.72),MMP2(+2.64),PENK(+36.26),SOCS3(+2.95),TH(+10.96)
transmembrane receptor	KIT	0.00934			1.849	17	15	2	ANKH(+1.95),BIRC5(+2.19),CCL2(+2.16),CD44(+3.93),CISH(+2.15),CXCR4(+2.78),HMGB1(+1.72),ICAM1(-2.26),KITLG(+2.68),MITF(+1.92),SH3BP2(+1.64),SNAI2(+6.19),SOCS1(+3.16),SOCS2(+3.94),SOCS3(+2.95),SPP1(-3.22),TYR(+6.76)
transmembrane receptor	ITGA5	0.00995			1.125	10	8	2	CD44(+3.93),CDKN1A(-2.32),COL2A1(+1.9),FOS(+2.02),GAS1(+3.38),MMP2(+2.64),PAX3(+2.67),PLAU(-2.34),TGFBR2(+2.5),WNT9A(+2.73)
transmembrane receptor	PTCH1	0.0132			0	7	5	2	COL2A1(+1.9),DLL1(-2.54),MTSS1(+1.87),MYCN(+3.19),PDGFRA(+3.34),SOX9(+1.56),TNNT1(-3.41)
transmembrane receptor	SFRP4	0.0133				4	4	0	AXIN2(+3.19),BIRC5(+2.19),CDH1(+3.1),FN1(+3.0)
transmembrane receptor	SEMA7A	0.0146		Activated	2.449	6	6	0	CCN3(+4.98),CCN4(+3.55),CCNA2(+1.74),COL1A1(+3.04),COL3A1(+8.18),FN1(+3.0)
transmembrane receptor	CLDN4	0.0233				2	2	0	CDH1(+3.1),CLDN1(+1.7)
transmembrane receptor	LRP1	0.0307			-0.882	9	7	2	CDH1(+3.1),COL3A1(+8.18),DDIT3(-2.04),GRIA1(+1.96),MMP2(+2.64),SERPINF1(+1.8),SLC2A4(-2.3),WNT1(+3.45),WNT10B(+2.6)
transmembrane receptor	GHR	0.0332			0.555	8	5	3	CDKN1A(-2.32),CISH(+2.15),LPL(-2.98),PRLR(+2.46),SOCS2(+3.94),SOCS3(+2.95),SOST(+3.32),SPP1(-3.22)
transmembrane receptor	FAS	0.0332			-1.331	45	33	12	AGER(-1.91),AKAP2(+2.04),ANXA2(+1.65),ARAP2(+1.94),BCL11A(+3.04),BIRC5(+2.19),BTG3(-2.04),CAMK2B(+3.05),CCL2(+2.16),CD44(+3.93),CDK5R1(+2.97),CDKN1A(-2.32),CEBPD(+2.36),COL15A1(+2.47),COL1A1(+3.04),COL3A1(+8.18),COL5A1(+2.19),DYRK3(-1.7),EPOR(-2.66),F5(+4.74),FBN1(+1.56),FOS(+2.02),FOXO1(+2.33),ICAM1(-2.26),IL13RA1(+1.55),INPP5D(-3.53),IQGAP2(+2.33),IRF1(+1.72),JMJD6(-1.9),LDLR(-1.85),MAP4K4(+1.6…
transmembrane receptor	TREM1	0.0362			-0.451	26	18	8	ACSL3(-1.86),ATP1B1(-2.11),CENPU(+2.42),CXCR4(+2.78),DTL(+2.23),EIF2AK3(-2.83),ETS2(+2.51),GPRC5A(+1.9),GREM1(-1.83),HS3ST3B1(+2.79),IL1R1(+1.71),INHBA(+3.11),IRF1(+1.72),LPL(-2.98),MMP19(+2.28),NEDD4L(+1.95),NPC1(-2.23),PALM2-AKAP2(+3.74),PHLDA1(+1.75),RHOU(+4.21),RIN2(+2.36),S1PR3(+1.97),SERPINB2(+4.74),SLC1A3(+5.03),SPP1(-3.22),STARD4(-2.18)
transmembrane receptor	TNFRSF11A	0.0366			0.447	5	4	1	FN1(+3.0),POU5F1(+11.76),SNAI1(+2.24),SOX2(-2.72),TFAP2A(+4.49)
transmembrane receptor	LEPR	0.0414			0.786	23	14	9	ADCYAP1(+4.25),ALOX15(-2.39),CNR1(+8.01),COL1A1(+3.04),CREB3L2(+1.81),CYP2E1(-2.25),FN1(+3.0),FOS(+2.02),GAP43(+4.63),HMGCR(-2.13),LDLR(-1.85),LGMN(-1.73),LPL(-2.98),MAP4K4(+1.66),MBP(+2.44),MMP19(+2.28),MMP2(+2.64),NR3C2(-2.48),SLC2A4(-2.3),SOCS2(+3.94),SOCS3(+2.95),SREBF2(-1.62),TGFBR2(+2.5)
transmembrane receptor	TENM1	0.0415				3	2	1	CHL1(+2.12),EDNRB(-4.04),ERBB3(+2.29)
transmembrane receptor	MPL	0.0415				3	1	2	FOS(+2.02),GP1BA(-2.63),ITGB3(-2.06)
transmembrane receptor	EDAR	0.0437	2.876			2	2	0	BMP4(+1.85),WNT10B(+2.6)
transmembrane receptor	DCC	0.0437				2	2	0	MBP(+2.44),YAP1(+1.52)
translation regulator	IGF2BP1	0.00031			1.912	9	9	0	AXIN2(+3.19),CD44(+3.93),COL14A1(+4.09),COL1A1(+3.04),COL5A1(+2.19),COL6A2(+1.72),SOX9(+1.56),TNC(+2.03),WNT3(+2.2)
translation regulator	ELAVL4	0.000316	5.592		1.925	4	4	0	GAP43(+4.63),MAPT(+3.09),MYCN(+3.19),NRN1(+3.71)
translation regulator	CPEB3	0.00075				3	3	0	EGFR(+2.45),GRIA1(+1.96),GRIA2(+6.74)
translation regulator	EEF1D	0.00075				3	3	0	CDH1(+3.1),COL2A1(+1.9),ITGA4(+4.92)
translation regulator	EIF4E2	0.00826				2	2	0	EGFR(+2.45),PDGFRA(+3.34)
translation regulator	EIF2A	0.0121				3	1	2	ATF5(+2.66),DDIT3(-2.04),HSPA5(-1.75)
translation regulator	EIF5A	0.0121				3	2	1	CDK5R1(+2.97),CDKN1A(-2.32),PEAK1(+1.79)
translation regulator	RPL22	0.0249			1.98	4	0	4	BBC3(-1.77),CDKN1A(-2.32),DDIT3(-2.04),HSPA5(-1.75)
translation regulator	PCBP1	0.0296				3	2	1	ALOX15(-2.39),CD44(+3.93),INHBA(+3.11)
translation regulator	EIF4G2	0.0301			-1.387	5	3	2	CDKN1A(-2.32),KLF4(+1.98),POU5F1(+11.76),SOX2(-2.72),TBX3(+6.55)
translation regulator	FMR1	0.0479			0.042	9	7	2	ALDOA(-1.51),GAP43(+4.63),GRIA1(+1.96),GRM2(+4.8),KCND2(+3.88),PCDH10(+2.31),RAB3A(-1.71),SLC1A2(+5.56),SYP(+2.92)
transcription regulator	ASCL1	3.72e-20	5.302	Activated	2.927	42	36	6	BIRC5(+2.19),CACNA2D3(+5.28),CDCA7(+3.62),CDK5R1(+2.97),CDKN1A(-2.32),DCX(+1.97),DLL1(-2.54),DLL3(+3.98),DLX2(+2.73),E2F1(+2.7),EPHA2(-1.74),FOXM1(+2.16),GRIK2(+4.11),GRM5(+3.07),HES5(-2.3),HEY2(+4.4),INSM1(+4.66),ISL1(+4.84),LAMP5(+5.21),LHX5(-1.77),LMX1B(+7.02),NEUROD2(+2.51),NEUROD6(+7.64),NFASC(+2.51),PAX3(+2.67),PCSK6(+3.65),PDGFRA(+3.34),PLXNA2(+4.68),RELN(+1.99),RET(+2.45),RORB(+4.44),SEZ6…
transcription regulator	CREB1	3.71e-16		Inhibited	-2.33	114	87	27	ANGPTL2(+2.25),ARFGEF3(-1.73),ARHGAP33(+2.31),ATF5(+2.66),BHLHE22(+5.15),BIRC5(+2.19),BNIP3(-1.92),BRINP2(+3.07),CA10(+5.2),CABP7(+3.49),CACNA1C(+3.21),CACNA2D1(+3.79),CALB2(+6.38),CALN1(+3.96),CAMK1D(+1.93),CAMKK2(+2.21),CAMKV(+2.54),CCNA2(+1.74),CCNB1(+1.58),CDK14(+2.15),CDKN1A(-2.32),CEBPD(+2.36),CHGA(+14.1),CHGB(+5.21),CRMP1(+1.96),CRYM(+4.04),CXCR4(+2.78),CYP51A1(-1.69),DCX(+1.97),EHD4(-2.45…
transcription regulator	REST	5.07e-14		Inhibited	-3.198	47	41	6	ASCL1(+5.3),CBLN1(+5.11),CHGB(+5.21),CHRNB2(+2.52),DCX(+1.97),DDX25(-3.08),EOMES(+2.75),EPHA10(+2.62),FGF14(+2.35),FUT9(+2.84),GAP43(+4.63),GLRA1(+5.8),GRIA2(+6.74),GRIK3(+4.73),HPGD(+5.34),INA(+4.47),JAM2(+2.07),KCNJ6(+2.32),KCNQ2(+2.98),KCNQ3(+8.74),KCNQ5(+4.65),LHX5(-1.77),NELL1(+3.29),NPTXR(+1.92),NRP1(+1.9),NRXN3(-2.05),OTULINL(+2.68),PAX3(+2.67),PENK(+36.26),POU4F1(+8.63),POU5F1(+11.76),PTP…
transcription regulator	CTNNB1	1.19e-12		Activated	3.751	134	100	34	ABCD4(-1.52),ACAP1(-2.03),ADGRG2(+3.87),AHR(+3.68),ALCAM(+3.09),ALDH1A3(+3.21),ALG3(-2.13),APCDD1(+15.97),ARFGAP3(-1.62),AXIN2(+3.19),BAMBI(+1.63),BBC3(-1.77),BIRC5(+2.19),BMF(+1.59),BMP1(+1.86),BMP4(+1.85),CACNA1G(+2.29),CALM1 (includes others)(+1.49),CAPN1(+1.7),CBLN1(+5.11),CCN4(+3.55),CCNA2(+1.74),CD44(+3.93),CDH1(+3.1),CDKN1A(-2.32),CHGA(+14.1),CNR1(+8.01),COL1A1(+3.04),COL27A1(+1.86),COL2A1…
transcription regulator	EOMES	1.36e-11	2.75		-0.746	35	33	2	ADCYAP1(+4.25),AFAP1(+2.7),ALCAM(+3.09),BHLHE22(+5.15),CEMIP(+3.39),CHRNA7(+1.94),COL3A1(+8.18),CRABP1(-3.88),CRYM(+4.04),CXCR4(+2.78),EGFLAM(+7.09),EOMES(+2.75),FOXC1(+7.92),FRZB(+4.89),FZD8(+3.03),H19(+1.99),KCNQ3(+8.74),KDR(+2.05),LHX9(+18.09),MEOX1(+2.78),MMP17(+2.55),MXRA5(+3.94),NAV2(+2.16),NHLH1(+4.05),NXPH4(+4.48),PDGFRA(+3.34),PLXNA4(+15.6),PMP22(+2.85),POU5F1(+11.76),PREX1(+2.02),SATB2(…
transcription regulator	HDAC1	2.36e-11		Inhibited	-2.134	60	52	8	APEX1(+1.71),AXIN2(+3.19),BAMBI(+1.63),BBC3(-1.77),BMF(+1.59),CCNA2(+1.74),CCNB1(+1.58),CD44(+3.93),CDC25A(+1.75),CDC25C(+1.99),CDC6(+2.07),CDH1(+3.1),CDKN1A(-2.32),COL1A1(+3.04),COL2A1(+1.9),COL9A1(+1.52),DHFR(+1.79),E2F2(+4.11),EGFR(+2.45),FOS(+2.02),FOXM1(+2.16),H2AFX(+1.72),INA(+4.47),ITGB4(+1.99),KDR(+2.05),LGR5(-3.4),LGR6(+3.91),LMO2(+2.46),MCM10(+2.64),MCM5(+2.08),MCM7(+1.89),MYBL2(+3.14),…
transcription regulator	TP53	3.77e-11			-0.625	254	179	75	A2M(+4.05),ACADL(+2.1),ACSL3(-1.86),ADAM12(+3.56),ADGRB1(+2.1),ALDOA(-1.51),ALOX15(-2.39),ANGPT1(+5.6),ANKH(+1.95),ANKRD1(-2.65),ANXA2(+1.65),APEX1(+1.71),ARAP2(+1.94),ARRB1(+2.62),ASF1B(+1.88),ASPM(+2.11),ASS1(+2.45),ASTN2(+1.88),ATL3(+1.78),AXIN2(+3.19),BBC3(-1.77),BIRC5(+2.19),BLZF1(-2.08),BMF(+1.59),BMP1(+1.86),BNIP3(-1.92),BOK(+2.12),BRCA1(+1.77),BUB1B(+1.96),CAMK2B(+3.05),CCDC80(+1.98),CCL2…
transcription regulator	KLF4	8.33e-11	1.983		1.369	59	45	14	ALCAM(+3.09),ANGPT1(+5.6),APCDD1(+15.97),ASCL1(+5.3),BCL11B(+4.28),BMPER(+5.67),BUB1B(+1.96),CCL2(+2.16),CCN3(+4.98),CCNB1(+1.58),CD44(+3.93),CDH1(+3.1),CDKN1A(-2.32),CDKN1C(-1.78),COBLL1(+1.75),COL1A1(+3.04),CRABP2(-1.58),CYP1A1(+5.71),DLL1(-2.54),E2F1(+2.7),EMX2(-1.97),EOMES(+2.75),EPHA2(-1.74),FN1(+3.0),FOXM1(+2.16),FRZB(+4.89),HEY1(+2.26),HEY2(+4.4),INHBA(+3.11),IRF6(+2.66),IRX3(+4.51),KDR(+2…
transcription regulator	ERG	9.55e-11		Activated	2.869	50	39	11	ABCC4(-2.19),ADGRG1(-1.62),ARHGAP20(+3.95),ARHGAP28(+3.07),ARHGAP31(+4.04),AXIN2(+3.19),CAMK1D(+1.93),CCNA2(+1.74),CDH1(+3.1),CHRNA3(+3.24),CHRNB2(+2.52),CNR1(+8.01),CUX2(+1.74),CXCR4(+2.78),DIAPH3(+1.93),DOCK1(+1.85),DOCK10(+2.67),DYNC1I1(+2.53),EPB41L3(+1.91),ETS1(+1.84),FMNL3(+1.91),GUCY1A1(+3.08),HDAC6(-1.75),HERPUD1(-1.74),HMGB1(+1.72),HPGD(+5.34),ICAM1(-2.26),LEF1(+2.55),MAP3K5(+3.69),MYCN(…
transcription regulator	CCND1	1.74e-10		Activated	3.297	68	54	14	ABCC4(-2.19),AFAP1(+2.7),ALDH1A3(+3.21),ASAP2(+1.65),ASPM(+2.11),BIRC5(+2.19),BRCA1(+1.77),BRIP1(+2.46),CCNA2(+1.74),CD44(+3.93),CDC45(+2.65),CDC6(+2.07),CDCA2(+1.8),CDCA7(+3.62),CDH1(+3.1),CDK6(+2.2),CDKN1A(-2.32),CENPF(+1.71),CENPK(+1.95),CLIC6(+1.86),COL1A1(+3.04),COL27A1(+1.86),CTNNBIP1(+1.87),DTL(+2.23),E2F1(+2.7),EGFR(+2.45),EPHA2(-1.74),ESCO2(+2.34),FAM83D(+2.32),FGFR1(+1.86),FOXM1(+2.16),…
transcription regulator	SP1	3.8e-10		Activated	3.445	98	69	29	ABCC8(+4.12),AGER(-1.91),ANKH(+1.95),ASS1(+2.45),BACE2(+1.84),BBC3(-1.77),BIRC5(+2.19),BMP4(+1.85),CBS/CBSL(+2.37),CCL2(+2.16),CCNA2(+1.74),CDC25B(+2.16),CDC25C(+1.99),CDH1(+3.1),CDK6(+2.2),CDKN1A(-2.32),CEBPD(+2.36),CHGA(+14.1),CHRNA3(+3.24),CHRNA5(+2.29),COL1A1(+3.04),COL2A1(+1.9),CRABP2(-1.58),CXCR4(+2.78),CYP1B1(+2.61),CYP51A1(-1.69),DHFR(+1.79),DIAPH3(+1.93),DLC1(+2.74),E2F1(+2.7),EGFR(+2.45…
transcription regulator	PPARGC1A	4.43e-10		Inhibited	-3.167	68	49	19	ACADL(+2.1),ADAMTS20(+2.39),ADAMTS5(+2.45),ADGRG1(-1.62),ANG(-3.03),ASPN(+14.68),BBC3(-1.77),BMP4(+1.85),BMPER(+5.67),BNIP3(-1.92),CALM1 (includes others)(+1.49),CCN4(+3.55),CDKN1A(-2.32),CEBPD(+2.36),COL2A1(+1.9),COL6A2(+1.72),CTSC(+2.16),CXCL14(+1.96),CYP1A1(+5.71),DCN(+24.15),EGFL6(+1.62),EGFR(+2.45),EMILIN2(-2.15),EPAS1(+2.73),FBLN1(+4.81),FBLN2(+2.22),FDPS(-1.71),FIBIN(+1.92),FNDC5(+1.74),GR…
transcription regulator	SOX2	1.38e-09	-2.718		-0.818	84	69	15	ABTB2(+2.14),AHR(+3.68),ANGPT1(+5.6),APCDD1(+15.97),ASCL1(+5.3),AXIN2(+3.19),BIRC5(+2.19),BMP4(+1.85),BMPER(+5.67),C1QL1(+2.32),CCN4(+3.55),CD44(+3.93),CDH1(+3.1),CDKN1A(-2.32),COBLL1(+1.75),COL1A1(+3.04),COL9A3(+4.01),CRABP2(-1.58),CREB3L2(+1.81),CTNNAL1(+1.6),CXCL14(+1.96),CXCR4(+2.78),DLL1(-2.54),DLX2(+2.73),DNMT3B(+2.47),DOCK10(+2.67),EGFR(+2.45),EMX2(-1.97),EOMES(+2.75),EPHA2(-1.74),ETS2(+2.…
transcription regulator	FOS	4.07e-09	2.019		0.888	93	71	22	A2M(+4.05),ADAM12(+3.56),ADD2(+2.03),ALDH1A3(+3.21),ARF1(-1.49),CCL2(+2.16),CCNA2(+1.74),CD44(+3.93),CDH1(+3.1),CDON(+1.56),CHGA(+14.1),COBLL1(+1.75),COL16A1(+5.19),COL1A1(+3.04),COL8A2(+5.86),CRABP1(-3.88),CRABP2(-1.58),CTSV(+2.48),DOCK1(+1.85),ERCC5(-1.9),FBLIM1(+2.57),FBN1(+1.56),FN1(+3.0),FOS(+2.02),FOXC1(+7.92),FRZB(+4.89),GAS1(+3.38),GM2A(-1.66),GRIK2(+4.11),HAS2(+4.55),HDAC6(-1.75),HOOK1(-…
transcription regulator	SMARCA4	4.12e-09		Activated	3.222	102	78	24	A2M(+4.05),ABLIM3(+3.62),ADGRG1(-1.62),AHR(+3.68),ALDH1A3(+3.21),ANGPTL2(+2.25),ANO1(+5.01),AXIN2(+3.19),BAMBI(+1.63),BIRC5(+2.19),BMP4(+1.85),C6orf141(+2.67),CALB2(+6.38),CCL2(+2.16),CCNA2(+1.74),CD44(+3.93),CDC25A(+1.75),CDC6(+2.07),CDH1(+3.1),CDK20(-1.81),CDKN1A(-2.32),CNTN1(+3.34),COL1A1(+3.04),CPS1(-2.96),CXCR4(+2.78),CYP1A1(+5.71),DCT(+10.71),DDX18(-1.87),DHFR(+1.79),DLL1(-2.54),DLX2(+2.73)…
transcription regulator	HTT	1.75e-08			-0.175	110	79	31	ADAMTS5(+2.45),ALDOA(-1.51),ALDOC(-3.65),AQP1(+2.14),ATP1A3(+2.61),ATP8A1(+3.33),BBC3(-1.77),BCL11B(+4.28),BMP1(+1.86),BMP3(+3.85),BTG3(-2.04),CA4(-6.57),CACNA2D3(+5.28),CAMK2B(+3.05),CBLN1(+5.11),CCN4(+3.55),CDK2AP1(+2.27),CDKN1A(-2.32),CHRNB2(+2.52),CLDN1(+1.7),CLIC6(+1.86),CNR1(+8.01),COL16A1(+5.19),CPLX2(+1.98),CTDSP1(+2.19),CYP51A1(-1.69),DCN(+24.15),DDIT3(-2.04),DHCR7(-1.88),DLL1(-2.54),DRD…
transcription regulator	EZH2	1.77e-08			0.08	67	60	7	AXIN2(+3.19),BMP4(+1.85),BMPR1B(-2.97),BRCA1(+1.77),CACNA1E(+4.04),CACNG4(+1.92),CDH1(+3.1),CDK6(+2.2),CDKN1A(-2.32),CEMIP(+3.39),CHRM3(+2.33),CNR1(+8.01),CRISPLD2(+7.46),CYP1B1(+2.61),E2F1(+2.7),EGFR(+2.45),EOMES(+2.75),EPAS1(+2.73),EPHA1(+2.49),FBLN1(+4.81),FBN1(+1.56),FOXF2(+7.89),FRZB(+4.89),FUCA1(-2.68),FZD1(+1.9),GDF15(-5.46),ICAM1(-2.26),JAM2(+2.07),KCNA1(+2.6),KLF2(+3.29),KLF4(+1.98),LAMB…
transcription regulator	NEUROG1	2.82e-08			0.426	22	17	5	AMIGO2(+3.9),ASS1(+2.45),CDK5R1(+2.97),CEMIP(+3.39),CFH(+16.28),COL3A1(+8.18),DCX(+1.97),EPAS1(+2.73),FN1(+3.0),GASK1B(-1.74),GREM1(-1.83),HAS2(+4.55),INHBA(+3.11),ITGB3(-2.06),LGR5(-3.4),LIX1(-1.97),LRRN3(+2.19),PAPPA(+1.92),RIPOR2(+2.15),SERPINF1(+1.8),TMEFF2(+3.08),TMTC2(+2.36)
transcription regulator	NOTCH1	3.37e-08	-1.48		0.521	52	38	14	ANGPT1(+5.6),ANKRD1(-2.65),ASCL1(+5.3),CD44(+3.93),CDCA7(+3.62),CDH1(+3.1),CDKN1A(-2.32),CDKN1C(-1.78),CEBPD(+2.36),CHGA(+14.1),COL1A1(+3.04),DLL1(-2.54),E2F1(+2.7),EGFR(+2.45),ENO2(-1.81),ERBB3(+2.29),FOS(+2.02),GAA(-1.56),GLS(+1.63),HES5(-2.3),HEY1(+2.26),HEY2(+4.4),ICAM1(-2.26),IFI16(+2.82),IRF1(+1.72),ITGB4(+1.99),LEF1(+2.55),LOX(+1.9),MMP2(+2.64),MYCN(+3.19),NEUROG2(+5.17),NHLH1(+4.05),NOTCH…
transcription regulator	MYC	3.5e-08		Activated	2.995	158	112	46	ABCC4(-2.19),ADARB1(+1.73),ADIPOR1(-1.58),ALCAM(+3.09),ALDOA(-1.51),ANGPT1(+5.6),AOPEP(+1.65),APCDD1(+15.97),APEX1(+1.71),AQP1(+2.14),ASCL1(+5.3),ASS1(+2.45),AXL(-1.57),BBC3(-1.77),BIRC5(+2.19),BMPER(+5.67),BRCA1(+1.77),BUB1B(+1.96),CCN4(+3.55),CCNA2(+1.74),CCNB1(+1.58),CD44(+3.93),CDC25A(+1.75),CDC25B(+2.16),CDC25C(+1.99),CDCA7(+3.62),CDH1(+3.1),CDK6(+2.2),CDKN1A(-2.32),CEBPD(+2.36),CLIC4(+1.64)…
transcription regulator	FOXO3	4.13e-08			-0.484	61	39	22	AHR(+3.68),ANGPT1(+5.6),APEX1(+1.71),BBC3(-1.77),BIRC5(+2.19),BNIP3(-1.92),BPGM(-1.82),BUB1B(+1.96),CCNB1(+1.58),CDC42EP3(+2.0),CDC45(+2.65),CDC6(+2.07),CDH1(+3.1),CDKN1A(-2.32),CDKN1C(-1.78),CLDN1(+1.7),CTSV(+2.48),CXCR4(+2.78),DDIT3(-2.04),DDIT4(-1.74),DLGAP5(+1.73),DOK5(+2.15),EDNRB(-4.04),ELOVL5(-2.06),ENO2(-1.81),FABP5(+2.52),FN1(+3.0),FOS(+2.02),FOXC1(+7.92),FOXM1(+2.16),FOXO1(+2.33),HMGCR(…
transcription regulator	FOXM1	7.12e-08	2.162	Activated	4.442	33	30	3	AXIN2(+3.19),BIRC5(+2.19),BRIP1(+2.46),BUB1B(+1.96),CCNA2(+1.74),CCNB1(+1.58),CDC25A(+1.75),CDC25B(+2.16),CDC25C(+1.99),CDCA2(+1.8),CDH1(+3.1),CDKN1A(-2.32),CENPA(+2.09),CENPF(+1.71),FOS(+2.02),FZD1(+1.9),KDR(+2.05),KIF20A(+1.86),LEF1(+2.55),LOX(+1.9),MKI67(+2.36),MMP2(+2.64),MYCN(+3.19),PGK1(-1.73),POU5F1(+11.76),SFRP1(+3.48),SKP2(+1.87),SNAI1(+2.24),SNAI2(+6.19),SOX2(-2.72),STMN1(+1.8),TGFBR2(+…
transcription regulator	TWIST1	7.18e-08		Activated	2.928	37	32	5	ALCAM(+3.09),AOPEP(+1.65),ASPM(+2.11),AXL(-1.57),C1QTNF1(+4.31),CCDC3(+6.75),CCL2(+2.16),CCN4(+3.55),CD44(+3.93),CDH1(+3.1),CDKN1A(-2.32),COL1A1(+3.04),COL2A1(+1.9),DCN(+24.15),EGFL6(+1.62),EMILIN1(+5.93),ETS1(+1.84),FGFR3(-2.34),FIBIN(+1.92),FN1(+3.0),FOS(+2.02),FOXO1(+2.33),HEG1(+1.87),IGFBP5(+2.03),ITGB3(-2.06),ITGB5(+1.71),MMP2(+2.64),OLFML3(+3.96),PDGFRA(+3.34),RUNX3(+7.22),SNAI1(+2.24),SNAI…
transcription regulator	VHL	1.04e-07			-0.467	33	19	14	ADGRG1(-1.62),AIF1(-4.76),BBC3(-1.77),BNIP3(-1.92),CDH1(+3.1),CDKN1A(-2.32),CDKN1C(-1.78),CXCR4(+2.78),DAB2(+1.76),E2F1(+2.7),EGFR(+2.45),ENO2(-1.81),EPAS1(+2.73),FN1(+3.0),FTL(-2.22),GNG4(+2.26),H2AFX(+1.72),INSIG2(-2.22),JADE1(+1.63),LOX(+1.9),NREP(+1.77),POLRMT(-1.81),PREB(-1.63),RUNX1(+5.8),SEC61G(-1.68),SKP2(+1.87),SLC16A3(-2.12),SLC1A3(+5.03),SLC40A1(+4.69),TFRC(+1.88),TH(+10.96),TMED3(-1.6…
transcription regulator	POU4F1	1.06e-07	8.626		1.03	29	27	2	ADCYAP1(+4.25),ADGRG2(+3.87),AJAP1(+2.43),CALB2(+6.38),CDKN1A(-2.32),CHRNA3(+3.24),CLIC6(+1.86),CNTN2(+4.37),CRABP1(-3.88),DAB1(+2.05),ETV4(+2.16),INA(+4.47),IRX1(+2.66),IRX2(+2.11),IRX3(+4.51),KCNMA1(+2.17),KCTD8(+2.71),NEUROD4(+11.66),NWD2(+3.38),NXPH4(+4.48),PIEZO2(+3.14),POU4F1(+8.63),PPP1R1C(+2.87),RET(+2.45),RUNX1(+5.8),RUNX3(+7.22),SCN7A(+8.07),SCN9A(+11.17),TH(+10.96)
transcription regulator	CDKN2A	1.26e-07		Inhibited	-3.358	56	48	8	A2M(+4.05),APPL2(+1.69),ASF1B(+1.88),BBC3(-1.77),BIRC5(+2.19),BTG3(-2.04),BUB1B(+1.96),CCL2(+2.16),CCNA2(+1.74),CCNB1(+1.58),CDC25A(+1.75),CDC25B(+2.16),CDC25C(+1.99),CDKN1A(-2.32),CEBPD(+2.36),CENPK(+1.95),CHAF1A(+2.72),CXCL14(+1.96),DDR1(-1.74),DHFR(+1.79),E2F1(+2.7),E2F2(+4.11),E2F3(+1.56),EBF1(+17.28),FAM111A(+1.64),FANCA(+2.73),FGFR1(+1.86),FHL2(+2.13),FOS(+2.02),GFRA2(+7.05),GPRC5A(+1.9),H2…
transcription regulator	EPAS1	1.34e-07	2.732	Activated	3.027	45	25	20	ACP5(-2.76),ALDOC(-3.65),AXL(-1.57),BBC3(-1.77),BNIP3(-1.92),CDKN1A(-2.32),CEMIP(+3.39),CLDN1(+1.7),CXCR4(+2.78),CYP51A1(-1.69),DDIT3(-2.04),DMXL1(+1.55),EGFR(+2.45),ENO2(-1.81),FBLN2(+2.22),FN1(+3.0),FOS(+2.02),GLS(+1.63),HMGCS1(-2.27),HSPA5(-1.75),IGFBP5(+2.03),INHBB(+5.09),ITGB3(-2.06),KDR(+2.05),LDLR(-1.85),LOX(+1.9),LPL(-2.98),NOS3(-5.35),NOTCH1(-1.48),NRN1(+3.71),PAN2(-2.57),PCDH10(+2.31),P…
transcription regulator	ZBTB17	1.58e-07		Inhibited	-3.171	24	17	7	ASPM(+2.11),BTG3(-2.04),BUB1B(+1.96),CCNA2(+1.74),CCNB1(+1.58),CDKN1A(-2.32),CDKN1C(-1.78),CENPF(+1.71),DCT(+10.71),DDIT3(-2.04),FOXM1(+2.16),IQGAP3(+1.88),KIF18B(+2.32),KIF20A(+1.86),LDLR(-1.85),LRRN3(+2.19),MKI67(+2.36),NDC80(+2.0),ODC1(-1.74),OSMR(+3.39),PIMREG(+2.08),RRM2B(-2.58),SOCS1(+3.16),SPTBN1(+1.85)
transcription regulator	YY1	1.9e-07			-0.453	53	46	7	ALCAM(+3.09),ANKRD1(-2.65),BIRC5(+2.19),BMP4(+1.85),BRCA1(+1.77),BUB1B(+1.96),CCNA2(+1.74),CCNB1(+1.58),CDC25C(+1.99),CDC6(+2.07),CDCA3(+1.93),CDH1(+3.1),CDKN1A(-2.32),CENPA(+2.09),COL15A1(+2.47),COL1A1(+3.04),COL9A3(+4.01),CRABP1(-3.88),CXCR4(+2.78),CYP24A1(+8.89),EBF2(+3.88),EGFR(+2.45),FDPS(-1.71),FOS(+2.02),FOXM1(+2.16),H2AFX(+1.72),HAS2(+4.55),HELLS(+1.95),HIST1H4C(+1.86),HMGCR(-2.13),HSPA5(…
transcription regulator	HIF1A	2.99e-07			0.698	71	49	22	ABCC8(+4.12),ALDOA(-1.51),ALDOC(-3.65),AXIN2(+3.19),AXL(-1.57),BACH2(+1.83),BIRC5(+2.19),BNIP3(-1.92),BRCA1(+1.77),CCN3(+4.98),CD44(+3.93),CDH1(+3.1),CDKN1A(-2.32),CEMIP(+3.39),CLDN1(+1.7),CTPS1(+1.63),CXCR4(+2.78),DDIT4(-1.74),E2F3(+1.56),EDNRB(-4.04),EGFR(+2.45),ENO2(-1.81),EPAS1(+2.73),EPOR(-2.66),ETS1(+1.84),FAM162A(-1.96),FHL2(+2.13),FN1(+3.0),FOS(+2.02),H2AFX(+1.72),HES6(+2.18),HIST1H2BK(+2…
transcription regulator	SREBF2	3.16e-07	-1.622	Inhibited	-2.522	23	5	18	ALDOC(-3.65),BMP4(+1.85),CAMK1D(+1.93),CDKN1A(-2.32),CYP51A1(-1.69),DHCR7(-1.88),FABP5(+2.52),FADS2(-1.92),FDFT1(-2.01),FDPS(-1.71),HES6(+2.18),HMGCR(-2.13),HMGCS1(-2.27),IDI1(-2.27),INSIG1(-2.21),LDLR(-1.85),LIPA(-2.07),MSMO1(-2.26),PCSK9(+6.83),SCD(-2.76),SQLE(-1.72),SREBF2(-1.62),STARD4(-2.18)
transcription regulator	ISL1	5.3e-07	4.845	Activated	2.254	24	23	1	A2M(+4.05),ADCYAP1(+4.25),ADGRG2(+3.87),AJAP1(+2.43),BMP4(+1.85),CALB2(+6.38),CLIC6(+1.86),CNTN2(+4.37),CRABP1(-3.88),DAB1(+2.05),ETV4(+2.16),IRX3(+4.51),MSX1(+6.43),NEUROD4(+11.66),NXPH4(+4.48),PIEZO2(+3.14),POU4F1(+8.63),PPP1R1C(+2.87),RET(+2.45),RUNX1(+5.8),RUNX3(+7.22),SCN7A(+8.07),SCN9A(+11.17),TH(+10.96)
transcription regulator	MITF	6.35e-07	1.915	Activated	4.251	46	41	5	ACP5(-2.76),ALCAM(+3.09),BRCA1(+1.77),CCNB1(+1.58),CD44(+3.93),CDC25B(+2.16),CDCA3(+1.93),CDK5R1(+2.97),CENPF(+1.71),CHAF1A(+2.72),COL1A1(+3.04),COL2A1(+1.9),CRX(+5.29),DCT(+10.71),EDNRB(-4.04),ESPL1(+2.25),ESRP1(+3.38),FANCA(+2.73),FN1(+3.0),FOS(+2.02),GM2A(-1.66),GPRIN1(+5.91),HPGD(+5.34),ITGA4(+4.92),KIF20A(+1.86),MBP(+2.44),MCM2(+2.05),MCM4(+3.3),MCM5(+2.08),MITF(+1.92),PIR(-2.59),POU5F1(+11.…
transcription regulator	SP3	7.16e-07			0.8	43	31	12	APBA1(+2.1),BIRC5(+2.19),BMF(+1.59),CBS/CBSL(+2.37),CDC25B(+2.16),CDK5R1(+2.97),CDKN1A(-2.32),CHRNA3(+3.24),COL1A1(+3.04),COL2A1(+1.9),CYP51A1(-1.69),DHFR(+1.79),E2F1(+2.7),EGFR(+2.45),EIF2AK2(+1.57),FOS(+2.02),GDF15(-5.46),HAS2(+4.55),HSPA5(-1.75),ITGB5(+1.71),JAM2(+2.07),KDR(+2.05),KLF4(+1.98),LDLR(-1.85),LPL(-2.98),MAOB(+1.93),MMP2(+2.64),MYCN(+3.19),NOS1(+2.43),NOS3(-5.35),NPTXR(+1.92),PGK1(-…
transcription regulator	MECP2	7.82e-07		Activated	2.207	29	26	3	ADAM12(+3.56),BRCA1(+1.77),CALB2(+6.38),CAMK2B(+3.05),CDH1(+3.1),E2F1(+2.7),ENPP4(-3.48),FOXP2(+5.5),GABBR2(+3.43),GABRB3(+4.19),GRIA1(+1.96),HSPA5(-1.75),INA(+4.47),KCNA1(+2.6),KCNJ6(+2.32),MBP(+2.44),NAV3(+1.74),PCDH10(+2.31),RELN(+1.99),RPH3A(+4.96),SCN2A(+6.01),SCN3A(+4.41),SPN(-2.84),SRPX2(+2.73),SYN3(+3.31),SYT4(+8.5),TH(+10.96),UNC5C(+3.35),YWHAB(+1.85)
transcription regulator	E2F4	8.91e-07				44	38	6	ASF1B(+1.88),BNIP3(-1.92),BRCA1(+1.77),CALM1 (includes others)(+1.49),CCNA2(+1.74),CDC25A(+1.75),CDC25C(+1.99),CDC6(+2.07),CDKN1A(-2.32),CENPA(+2.09),DHFR(+1.79),E2F1(+2.7),E2F2(+4.11),E2F3(+1.56),EPAS1(+2.73),FDFT1(-2.01),FOXM1(+2.16),GINS1(+2.07),GOLT1B(-1.88),H2AFX(+1.72),HIST1H3D(+2.41),HIST2H2AA3/HIST2H2AA4(+1.76),HMGB1(+1.72),MCM10(+2.64),MCM4(+3.3),MCM5(+2.08),MKI67(+2.36),MYBL2(+3.14),MYC…
transcription regulator	ATN1	9.17e-07				31	23	8	ATP1A3(+2.61),ATP1B1(-2.11),ATP1B2(-1.79),BMP1(+1.86),BMP3(+3.85),BTG3(-2.04),CA4(-6.57),CBLN1(+5.11),CDK2AP1(+2.27),CHGB(+5.21),CNR1(+8.01),DPYSL3(+1.96),EBF1(+17.28),ENO2(-1.81),FGF1(+2.78),GRIN2C(-2.81),HIST2H2AA3/HIST2H2AA4(+1.76),IFI16(+2.82),IGFBP5(+2.03),KCNA1(+2.6),KCNK3(+5.6),LTBP2(+1.8),NR2F1(-5.84),NREP(+1.77),NSG2(+6.34),PENK(+36.26),PRKACB(+1.84),SOCS2(+3.94),SPP1(-3.22),STMN1(+1.8),…
transcription regulator	TP63	1e-06	7.646		0.952	65	43	22	AHR(+3.68),ALDH1A3(+3.21),AXL(-1.57),BBC3(-1.77),BRCA1(+1.77),BST2(-3.56),CA4(-6.57),CCNA2(+1.74),CCNB1(+1.58),CDC25C(+1.99),CDH1(+3.1),CDK6(+2.2),CDKN1A(-2.32),CDKN1C(-1.78),CLDN3(-2.47),COL5A1(+2.19),CXCR4(+2.78),DDIT4(-1.74),DLL1(-2.54),E2F1(+2.7),EGFR(+2.45),EMP1(+1.7),EPHA2(-1.74),ERCC5(-1.9),FANCA(+2.73),FBN1(+1.56),FGFR3(-2.34),FN1(+3.0),FOS(+2.02),GREM1(-1.83),HAS3(+1.94),HES5(-2.3),HMGA2…
transcription regulator	NKX2-1	1.06e-06			0.45	38	30	8	ADCYAP1(+4.25),AGER(-1.91),AQP1(+2.14),BMP4(+1.85),BTG3(-2.04),CA4(-6.57),CHRNA5(+2.29),CHRNA7(+1.94),COL9A1(+1.52),CREB3L4(-2.0),ENC1(+2.52),EPHB1(+2.81),FOXF2(+7.89),HELLS(+1.95),KITLG(+2.68),LEF1(+2.55),MAPT(+3.09),MMP2(+2.64),MTUS1(+3.45),NKD1(+2.75),PDGFRA(+3.34),RET(+2.45),ROR1(+2.54),RRM2(+3.05),SCARA3(+3.58),SCD(-2.76),SCN7A(+8.07),SH3PXD2A(+2.5),SMAD7(+1.75),SNAI1(+2.24),SNAI2(+6.19),SOX…
transcription regulator	HIC1	1.06e-06	2.861	Inhibited	-2.125	19	13	6	AMIGO2(+3.9),ANO2(+4.77),CCN3(+4.98),CDKN1A(-2.32),CDKN1C(-1.78),CDO1(-1.69),CXCL14(+1.96),CYP24A1(+8.89),EPHA2(-1.74),FADS1(-1.71),FHL2(+2.13),INHBA(+3.11),KCNJ6(+2.32),PLPPR4(+2.57),RIN2(+2.36),SLC7A11(+3.3),SOX9(+1.56),SPP1(-3.22),TNS3(+1.81)
transcription regulator	E2F1	1.16e-06	2.701	Activated	3.175	78	56	22	ACADL(+2.1),BBC3(-1.77),BIRC5(+2.19),BMP4(+1.85),BNIP3(-1.92),BOK(+2.12),BRCA1(+1.77),CALD1(+1.68),CALM1 (includes others)(+1.49),CBX7(-1.96),CCNA2(+1.74),CCNB1(+1.58),CD44(+3.93),CDC25A(+1.75),CDC25B(+2.16),CDC45(+2.65),CDC6(+2.07),CDKN1A(-2.32),CDKN1C(-1.78),COL2A1(+1.9),CRABP2(-1.58),CTNNBIP1(+1.87),CYP27B1(-2.51),DDAH2(-1.51),DDIT3(-2.04),DGKI(+3.7),DHFR(+1.79),DIABLO(-1.53),E2F1(+2.7),E2F2(+…
transcription regulator	SOX10	1.19e-06			1.296	13	10	3	CHRNA3(+3.24),EDNRB(-4.04),ERBB3(+2.29),FOS(+2.02),GDA(+2.45),LAMB1(+1.98),MITF(+1.92),NOTCH1(-1.48),PAX3(+2.67),PMP22(+2.85),PTN(+2.21),RET(+2.45),SOD3(-2.52)
transcription regulator	NUPR1	1.22e-06		Inhibited	-4.947	79	61	18	ABCC5(+1.68),ADGRG1(-1.62),ALDOC(-3.65),ASPM(+2.11),BNIP3(-1.92),BRCA1(+1.77),BRINP3(+6.4),BUB1B(+1.96),C1orf112(+1.83),CCDC9(-2.02),CCNA2(+1.74),CDC25C(+1.99),CDCA2(+1.8),CDCA3(+1.93),COL3A1(+8.18),CXCR4(+2.78),CYSTM1(-1.86),DDIT3(-2.04),DNMT3B(+2.47),DNTTIP1(-1.85),ENO2(-1.81),ESPL1(+2.25),ETS1(+1.84),ETV6(+1.96),FAM111A(+1.64),FAM111B(+2.72),FAM162A(-1.96),FGF1(+2.78),FHL2(+2.13),FUCA1(-2.68),…
transcription regulator	PAX7	1.27e-06		Activated	3.221	21	19	2	AHR(+3.68),ASS1(+2.45),CAMK1D(+1.93),CLDN3(-2.47),CXCR4(+2.78),GALNT13(+2.84),IL13RA1(+1.55),LIX1(-1.97),LRFN5(+3.81),MDFIC(+2.78),MYO1D(+1.85),NFIX(+13.48),NPNT(+3.37),OLFM1(+3.09),PARM1(+2.68),PKIA(+1.77),PLAGL1(+1.91),PRRX1(+8.65),SCLT1(+2.81),SYNE2(+1.51),ZNF407(+1.66)
transcription regulator	HTATIP2	1.64e-06			-1.195	11	9	2	ADGRB1(+2.1),ANGPT1(+5.6),CDH1(+3.1),EGFR(+2.45),FOS(+2.02),MMP2(+2.64),PKM(+1.93),POU5F1(+11.76),SNAI1(+2.24),SOX2(-2.72),SPP1(-3.22)
transcription regulator	SMARCB1	1.65e-06			-0.56	36	29	7	A2M(+4.05),ATP1B1(-2.11),BNIP3(-1.92),C4A/C4B(+2.69),CCNA2(+1.74),CD44(+3.93),CDC6(+2.07),CDH1(+3.1),CDKN1A(-2.32),CENPA(+2.09),COL14A1(+4.09),COL1A1(+3.04),CXCR4(+2.78),CYP2C8(+2.62),CYP2E1(-2.25),DHFR(+1.79),DOCK4(+2.36),E2F1(+2.7),EIF2AK2(+1.57),ETS2(+2.51),FOS(+2.02),HES5(-2.3),HEY1(+2.26),IFI16(+2.82),IFITM1(-1.87),KLHL4(+6.73),MCM10(+2.64),MCM2(+2.05),MCM4(+3.3),MCM5(+2.08),MYBL2(+3.14),PLC…
transcription regulator	FOXO1	1.76e-06	2.332	Activated	2.782	70	43	27	A2M(+4.05),ADIPOR1(-1.58),AFF3(+1.85),ANGPT1(+5.6),ASPM(+2.11),BACH2(+1.83),BIRC5(+2.19),BRIP1(+2.46),CCN3(+4.98),CCNA2(+1.74),CCNB1(+1.58),CDC42EP3(+2.0),CDK5RAP3(-1.65),CDKN1A(-2.32),CDKN1C(-1.78),CENPF(+1.71),CNR1(+8.01),COX18(-2.0),CTSV(+2.48),DCX(+1.97),DDIT4(-1.74),DLGAP5(+1.73),EBF1(+17.28),EDNRB(-4.04),ELOVL5(-2.06),EOMES(+2.75),FABP5(+2.52),FDPS(-1.71),FN1(+3.0),FOS(+2.02),FOXC1(+7.92),F…
transcription regulator	ETV1	2.77e-06			0.14	11	8	3	ACSL3(-1.86),ASCL1(+5.3),BRCA1(+1.77),CXCR4(+2.78),E2F1(+2.7),HSD17B7(-2.16),ITGB3(-2.06),MITF(+1.92),SOX9(+1.56),TGFBR2(+2.5),WWTR1(+2.19)
transcription regulator	GLI1	2.91e-06		Activated	3.309	40	33	7	ASPM(+2.11),C11orf96(+3.38),CDH1(+3.1),CDKN1A(-2.32),CMPK2(+2.05),COL1A1(+3.04),COL2A1(+1.9),ELAVL2(+5.16),FGF1(+2.78),FOXM1(+2.16),HEY2(+4.4),HHIP(+2.74),INSIG1(-2.21),KLF4(+1.98),LZTS1(+3.43),MMP2(+2.64),MYCN(+3.19),NAV3(+1.74),NIPAL2(+3.48),NR2F2(-2.13),NREP(+1.77),PDGFRA(+3.34),PDZRN3(+2.24),PGM2L1(+1.71),PRKCE(+2.15),PTH1R(+1.87),SFRP1(+3.48),SNAI1(+2.24),SOCS1(+3.16),SOX2(-2.72),SOX9(+1.56)…
transcription regulator	TAF4	2.96e-06			-0.955	24	19	5	CDH1(+3.1),CLDN1(+1.7),DCN(+24.15),DLX2(+2.73),E2F2(+4.11),EGFR(+2.45),ETS1(+1.84),GAS1(+3.38),GREM1(-1.83),KLF4(+1.98),LRRC15(+2.96),MAP4K4(+1.66),MMP2(+2.64),MXD1(-1.84),OLFML3(+3.96),PENK(+36.26),PTN(+2.21),RUNX1(+5.8),SPP1(-3.22),TAF13(-1.91),TGFB3(+5.19),TGM1(-2.4),VEGFC(+2.34),WNT9A(+2.73)
transcription regulator	GLI3	3.23e-06			1.252	20	18	2	BMP4(+1.85),DLX2(+2.73),EBF1(+17.28),EMX1(+3.76),EMX2(-1.97),FOXO1(+2.33),GREM1(-1.83),H2AFX(+1.72),HHIP(+2.74),IRF1(+1.72),KLF2(+3.29),MYCN(+3.19),NFKBIZ(+1.86),RUNX1(+5.8),SFRP1(+3.48),SOX9(+1.56),STMN1(+1.8),TP63(+7.65),WNT2B(+1.89),WNT3A(+1.77)
transcription regulator	STAT3	3.75e-06		Activated	2.201	87	66	21	A2M(+4.05),AHR(+3.68),ALDH1A3(+3.21),ALOX15(-2.39),APEX1(+1.71),BIRC5(+2.19),BMF(+1.59),BOC(+1.7),BST2(-3.56),CCL2(+2.16),CCNB1(+1.58),CDC25A(+1.75),CDH1(+3.1),CDKN1A(-2.32),CDON(+1.56),CEBPD(+2.36),CLN6(+1.98),CMPK2(+2.05),COL1A1(+3.04),COL3A1(+8.18),COL5A1(+2.19),CXCR4(+2.78),DDIT3(-2.04),DLL1(-2.54),DNMT3B(+2.47),EIF2AK2(+1.57),EOMES(+2.75),EPAS1(+2.73),FN1(+3.0),FOS(+2.02),FOXM1(+2.16),GAP43(…
transcription regulator	BRCA1	4.98e-06	1.767		-0.92	36	25	11	ALDH1A3(+3.21),ANGPT1(+5.6),BIRC5(+2.19),BRCA1(+1.77),CAMK2B(+3.05),CCNB1(+1.58),CDC25C(+1.99),CDKN1A(-2.32),CYP1A1(+5.71),CYP1B1(+2.61),DDIT3(-2.04),DDIT4(-1.74),E2F3(+1.56),EGFR(+2.45),ERCC5(-1.9),FHL2(+2.13),FOXO1(+2.33),GDF15(-5.46),H2AFX(+1.72),HMGA2(+2.05),IFITM1(-1.87),KRT17(+7.24),NOS3(-5.35),NOTCH1(-1.48),PHLDA1(+1.75),PLSCR1(+1.97),ROBO1(+2.24),RRM2B(-2.58),SAT1(-2.6),SFN(+4.58),SFPQ(+2…
transcription regulator	RBPJ	5.37e-06		Inhibited	-2.555	31	25	6	ASCL1(+5.3),BMP3(+3.85),CD44(+3.93),CDCA7(+3.62),CDKN1A(-2.32),DLL1(-2.54),ETS1(+1.84),FGF1(+2.78),FGF11(-1.98),FOS(+2.02),GLS(+1.63),HAS2(+4.55),HES5(-2.3),HEY1(+2.26),HEY2(+4.4),INHBA(+3.11),INHBB(+5.09),KITLG(+2.68),LEF1(+2.55),MIB2(-1.52),NEUROG2(+5.17),NHLH1(+4.05),NTF3(+3.71),RUNX3(+7.22),SOX2(-2.72),SOX9(+1.56),TDGF1(+5.05),TGFB3(+5.19),TNC(+2.03),UNCX(+3.63),VEGFC(+2.34)
transcription regulator	NKX2-3	5.73e-06			-1.121	41	31	10	BCHE(+2.65),BMP4(+1.85),CBS/CBSL(+2.37),CENPW(+2.33),CMPK2(+2.05),DCLK1(+4.51),DDX60(+2.55),DDX60L(+2.17),EIF2AK2(+1.57),GASK1B(-1.74),GCA(-3.2),GDF15(-5.46),HEY1(+2.26),HEY2(+4.4),HIST2H2AA3/HIST2H2AA4(+1.76),KLF2(+3.29),KLF4(+1.98),LGMN(-1.73),LY6E(+1.59),MAMDC2(-2.36),NOS3(-5.35),NR2F1(-5.84),PARP14(+1.67),PARP9(+2.49),PIM3(-1.73),PKIA(+1.77),PLSCR1(+1.97),REEP1(+4.07),SHOX2(+5.67),SLC40A1(+4.…
transcription regulator	RUNX3	6.94e-06	7.224	Inhibited	-3.585	28	23	5	ABCC5(+1.68),AKAP6(+1.88),BBC3(-1.77),BIRC5(+2.19),CDKN1A(-2.32),EOMES(+2.75),FBN1(+1.56),ITGB5(+1.71),KHDRBS3(+1.85),LOX(+1.9),MMP2(+2.64),MSRB3(+2.07),NUAK1(+2.04),PAPPA(+1.92),PARVA(+1.93),REEP1(+4.07),RHOBTB1(+1.57),RNF150(+1.78),RTN1(+3.22),RUNX1(+5.8),SCARA3(+3.58),SGCD(+4.38),SLIT2(-1.78),SNAI2(+6.19),SPP1(-3.22),STC2(-2.04),SVEP1(+9.53),THY1(+1.92)
transcription regulator	PRDM5	7.43e-06				22	18	4	ACSBG1(-3.4),ADARB2(+3.39),CACNA1C(+3.21),CEMIP(+3.39),E2F3(+1.56),EBF1(+17.28),EDNRA(+9.03),ENO2(-1.81),ETS2(+2.51),HIST4H4(+2.14),ISLR(+7.26),ISLR2(+2.32),NAV2(+2.16),NLRC5(+2.98),NOTCH1(-1.48),NREP(+1.77),PALM2-AKAP2(+3.74),POU5F1(+11.76),RUNX1(+5.8),SOCS3(+2.95),SOX2(-2.72),WNT10B(+2.6)
transcription regulator	ZNF217	1e-05			-0.535	20	18	2	ASF1B(+1.88),ATL1(+2.14),CCL2(+2.16),CENPK(+1.95),EOMES(+2.75),ERBB3(+2.29),GPRC5A(+1.9),IFI16(+2.82),KLHL4(+6.73),MPZL2(+2.59),MYCN(+3.19),NMNAT2(+2.55),NRK(+2.88),NRXN3(-2.05),SOCS2(+3.94),ST6GAL1(+1.6),STRA6(+2.0),TDGF1(+5.05),TP53TG1(-1.95),ZNF367(+2.34)
transcription regulator	TBX2	1e-05	2.414	Activated	2.714	20	17	3	ASF1B(+1.88),ATF5(+2.66),CCNA2(+1.74),CCNB1(+1.58),CDC6(+2.07),CDCA3(+1.93),CDH1(+3.1),CDKN1A(-2.32),DDIT3(-2.04),E2F1(+2.7),ELK3(+2.33),FOXM1(+2.16),HELLS(+1.95),HEY1(+2.26),MCM2(+2.05),MCM4(+3.3),MCM5(+2.08),MCM7(+1.89),PKMYT1(+2.76),SREBF2(-1.62)
transcription regulator	MTA1	1.03e-05			-0.882	15	11	4	APEX1(+1.71),BRCA1(+1.77),CCN4(+3.55),CDH1(+3.1),CDKN1C(-1.78),EMP1(+1.7),EPHA2(-1.74),GPRIN3(+4.47),HUNK(+4.2),MMP2(+2.64),PIK3R1(+2.25),RRM2B(-2.58),SIX3(-4.44),SNAI1(+2.24),WNT1(+3.45)
transcription regulator	TCF3	1.32e-05			-0.239	55	41	14	ABCC8(+4.12),ALCAM(+3.09),ASF1B(+1.88),AXIN2(+3.19),BACH2(+1.83),BIRC5(+2.19),CCNA2(+1.74),CCNB1(+1.58),CDC25B(+2.16),CDC45(+2.65),CDCA3(+1.93),CDH1(+3.1),CDK6(+2.2),CDKN1A(-2.32),CHRNA5(+2.29),COL1A1(+3.04),CREB3L2(+1.81),CTSV(+2.48),DOCK1(+1.85),EAF2(-4.18),EBF1(+17.28),ENTPD1(-1.58),EPOR(-2.66),EPRS(-1.78),ESCO2(+2.34),ETS2(+2.51),FGFR3(-2.34),FOXO1(+2.33),GM2A(-1.66),GRIA1(+1.96),H1F0(-1.98),…
transcription regulator	SKI	1.42e-05	1.658		0.749	10	8	2	BCL11B(+4.28),CDC25A(+1.75),CDH1(+3.1),CDKN1A(-2.32),MBP(+2.44),MITF(+1.92),ODC1(-1.74),PAX3(+2.67),PMP22(+2.85),SMAD7(+1.75)
transcription regulator	DDIT3	1.46e-05	-2.039		-0.817	26	17	9	ANKRD1(-2.65),ATF5(+2.66),BBC3(-1.77),BHLHE22(+5.15),CCDC80(+1.98),CEBPD(+2.36),CHAF1A(+2.72),CLPP(-1.95),DDIT3(-2.04),DDR2(+4.69),DOCK4(+2.36),FN1(+3.0),FOXO1(+2.33),HSPA5(-1.75),LOX(+1.9),LTBP3(+2.15),PER1(-2.15),RGS4(+5.61),RUNX3(+7.22),SH3RF3(+3.25),SKP2(+1.87),SNAI2(+6.19),SOX2(-2.72),STX1A(-1.66),TENM4(+3.27),TNFRSF10B(-1.99)
transcription regulator	YAP1	1.51e-05	1.519		1.55	28	18	10	ANKRD1(-2.65),BIRC5(+2.19),BMPR1B(-2.97),CCDC80(+1.98),CDH1(+3.1),CDK6(+2.2),CDKN1A(-2.32),DIAPH3(+1.93),E2F1(+2.7),EGFR(+2.45),FGF1(+2.78),FN1(+3.0),FOS(+2.02),FOXM1(+2.16),HMGCR(-2.13),HMGCS1(-2.27),ICAM1(-2.26),LINC00467(-2.69),LPL(-2.98),OXNAD1(-2.11),SFN(+4.58),SNAI2(+6.19),SOX2(-2.72),SOX9(+1.56),SYNE3(+3.67),TEAD4(+2.38),TP63(+7.65),WWTR1(+2.19)
transcription regulator	E2F2	1.59e-05	4.112	Activated	2.967	19	18	1	BIRC5(+2.19),CCNA2(+1.74),CCNB1(+1.58),CDC25A(+1.75),CDC45(+2.65),CDC6(+2.07),CDKN1A(-2.32),DHFR(+1.79),E2F1(+2.7),E2F3(+1.56),MCM10(+2.64),MCM2(+2.05),MCM4(+3.3),MCM5(+2.08),MCM7(+1.89),MYBL2(+3.14),MYCN(+3.19),ORC1(+2.7),RRM2(+3.05)
transcription regulator	HES1	1.6e-05			-0.513	17	10	7	ADAMTS5(+2.45),ASCL1(+5.3),BBC3(-1.77),CDKN1A(-2.32),CHGA(+14.1),DLL1(-2.54),DLL3(+3.98),E2F1(+2.7),GAA(-1.56),GLS(+1.63),GRIA1(+1.96),ISL1(+4.84),NEU1(-1.73),NOTCH1(-1.48),SPP1(-3.22),TPH1(+6.4),WNT1(+3.45)
transcription regulator	POU4F2	1.71e-05			-1.4	13	12	1	BHLHE22(+5.15),BRCA1(+1.77),CRX(+5.29),DLX2(+2.73),EBF3(+4.04),NEUROD4(+11.66),NEUROG2(+5.17),NHLH1(+4.05),POU4F1(+8.63),SIX3(-4.44),TFAP2A(+4.49),TH(+10.96),THRB(+2.26)
transcription regulator	TP73	1.89e-05		Inhibited	-2.106	62	44	18	BBC3(-1.77),BIRC5(+2.19),BLZF1(-2.08),CCL2(+2.16),CCNA2(+1.74),CCNB1(+1.58),CDC25B(+2.16),CDC25C(+1.99),CDH1(+3.1),CDKN1A(-2.32),CDKN1C(-1.78),COL1A1(+3.04),DAB1(+2.05),DDIT3(-2.04),DDIT4(-1.74),DHFR(+1.79),EGFR(+2.45),EPHA2(-1.74),ERCC5(-1.9),FGFR3(-2.34),FN1(+3.0),HIC1(+2.86),HSPA1A/HSPA1B(-1.64),IGFBP5(+2.03),IGSF3(+1.64),ITGB4(+1.99),KRT10(-1.65),LBH(+1.99),LTBP1(+2.43),LZTS1(+3.43),MCM7(+1.8…
transcription regulator	TCF4	1.89e-05			0.281	62	48	14	ALCAM(+3.09),ASCL1(+5.3),ASF1B(+1.88),AXIN2(+3.19),BACH2(+1.83),BIRC5(+2.19),BNIP3(-1.92),CCNA2(+1.74),CDC25B(+2.16),CDCA3(+1.93),CDK6(+2.2),CDKN1A(-2.32),CDKN1C(-1.78),CREB3L2(+1.81),DCT(+10.71),EAF2(-4.18),ENTPD1(-1.58),ESCO2(+2.34),FAM111A(+1.64),FGF1(+2.78),FN1(+3.0),FOS(+2.02),FOXO1(+2.33),H1F0(-1.98),HS3ST2(+4.26),IFI16(+2.82),IGFBP5(+2.03),INHBA(+3.11),KALRN(+2.8),LEF1(+2.55),LMO2(+2.46),L…
transcription regulator	PTF1A	2.03e-05			1.668	17	15	2	CACNA2D3(+5.28),CALB2(+6.38),CRABP1(-3.88),GRIK2(+4.11),GRIK3(+4.73),GRM5(+3.07),ISL1(+4.84),LAMP5(+5.21),LHX5(-1.77),LMX1B(+7.02),MPPED2(+2.7),NEUROD6(+7.64),RORB(+4.44),SEZ6(+3.02),SSTR2(+3.34),UNCX(+3.63),ZMAT4(+2.46)
transcription regulator	NEUROD1	2.35e-05		Activated	2.372	13	11	2	ABCC8(+4.12),CDK5R1(+2.97),CDKN1A(-2.32),CHGA(+14.1),DCX(+1.97),INSM1(+4.66),INSM2(+5.63),MGAT5B(+2.29),NEUROD2(+2.51),PCSK2(+10.15),SLIT2(-1.78),ST18(+4.07),SYP(+2.92)
transcription regulator	HDAC2	2.7e-05			-1.801	28	20	8	APEX1(+1.71),BBC3(-1.77),BRCA1(+1.77),CDH1(+3.1),CDKN1A(-2.32),COL2A1(+1.9),FOXM1(+2.16),INPP5F(-1.84),LGR5(-3.4),LGR6(+3.91),MCM10(+2.64),MCM5(+2.08),MCM7(+1.89),MYCN(+3.19),NASP(+2.47),PAX3(+2.67),PLAU(-2.34),PREX1(+2.02),RAD54L(+3.19),RRM2B(-2.58),SCN2A(+6.01),SFRP1(+3.48),SIX3(-4.44),SOX9(+1.56),STMN2(+2.47),STX1A(-1.66),TP63(+7.65),TPD52(+2.19)
transcription regulator	NEUROG3	2.97e-05		Activated	3.332	19	17	2	ABCC8(+4.12),CHGA(+14.1),CTSV(+2.48),DLL1(-2.54),EBF1(+17.28),ERBB3(+2.29),HES6(+2.18),INSM2(+5.63),ISL1(+4.84),LHX4(+2.5),NEUROD2(+2.51),NHLH1(+4.05),NR2F1(-5.84),NRP1(+1.9),ROBO1(+2.24),RORB(+4.44),SNAI2(+6.19),ST18(+4.07),SYP(+2.92)
transcription regulator	EP300	3.04e-05		Activated	2.913	66	55	11	ACADL(+2.1),ADAM12(+3.56),ANGPT1(+5.6),AXIN2(+3.19),BBC3(-1.77),BIRC5(+2.19),BMF(+1.59),BRCA1(+1.77),CAMK2B(+3.05),CCL2(+2.16),CDC25A(+1.75),CDC42EP3(+2.0),CDKN1A(-2.32),COL2A1(+1.9),CRABP2(-1.58),CRISPLD2(+7.46),CXCR4(+2.78),CYP1A1(+5.71),DHFR(+1.79),E2F1(+2.7),EDARADD(+3.77),FN1(+3.0),FOS(+2.02),FOSL2(+1.73),FOXO1(+2.33),GM2A(-1.66),GNG2(+1.65),HES6(+2.18),HMGCR(-2.13),IL1R1(+1.71),IRF6(+2.66),…
transcription regulator	XBP1	3.05e-05		Inhibited	-4.053	38	5	33	ABCA12(+2.54),ARFGAP3(-1.62),BLZF1(-2.08),COG3(-1.58),COG6(-2.14),CYP2E1(-2.25),DAD1(-1.61),DDIT3(-2.04),DNAJB2(-1.85),EIF2AK3(-2.83),ERLEC1(-1.65),ETS1(+1.84),FN1(+3.0),GGCX(-1.59),GOLGA3(-1.84),GOLGA4(-1.84),GORASP2(-1.52),GOSR2(-1.7),HERPUD1(-1.74),HM13(-1.61),HSPA5(-1.75),ICAM1(-2.26),KDELR2(-1.62),KLF4(+1.98),RAB3A(-1.71),RCN3(-2.13),S1PR1(-2.26),SCD(-2.76),SEC23B(-1.9),SEC61G(-1.68),SERP1(-…
transcription regulator	KDM5B	3.11e-05		Inhibited	-2.387	28	19	9	BRCA1(+1.77),BUB1B(+1.96),CCNB1(+1.58),CDCA3(+1.93),CLDN1(+1.7),DDIT3(-2.04),DLGAP5(+1.73),E2F1(+2.7),ERBB3(+2.29),FABP5(+2.52),GCA(-3.2),INSIG1(-2.21),ISL1(+4.84),LRCH4(-1.82),MCM2(+2.05),MPC1(-3.14),NDC80(+2.0),NEUROD2(+2.51),NOL3(-2.32),PIR(-2.59),PRLR(+2.46),PSD3(+1.71),REEP1(+4.07),SAT1(-2.6),SMARCA2(+1.75),SOX9(+1.56),WNT3A(+1.77),WNT7B(-2.48)
transcription regulator	POU5F1	3.16e-05	11.761	Activated	3.177	54	41	13	AHR(+3.68),ANGPT1(+5.6),APCDD1(+15.97),ASCL1(+5.3),BIRC5(+2.19),BMP4(+1.85),BMPER(+5.67),BNIP3(-1.92),BRCA1(+1.77),CDH1(+3.1),CDKN1A(-2.32),COBLL1(+1.75),CRABP2(-1.58),DNMT3B(+2.47),EOMES(+2.75),EPHA2(-1.74),FBXO15(-2.33),FRZB(+4.89),H19(+1.99),HRK(+2.06),INHBA(+3.11),IRF6(+2.66),IRX3(+4.51),ISL1(+4.84),KLF2(+3.29),KLF4(+1.98),KRT17(+7.24),LHX5(-1.77),LOXL1(+1.92),MEIS1(-2.08),MMP2(+2.64),MYBL2(+…
transcription regulator	SNAI1	3.16e-05	2.243		0.874	26	18	8	ADD2(+2.03),AFAP1(+2.7),ANKRD1(-2.65),AXL(-1.57),CCL2(+2.16),CDC25B(+2.16),CDH1(+3.1),CDKN1A(-2.32),CLDN1(+1.7),CLDN12(-1.74),CLDN3(-2.47),COL1A1(+3.04),COL2A1(+1.9),ESRP1(+3.38),FN1(+3.0),FOS(+2.02),HPGD(+5.34),KRT17(+7.24),LEF1(+2.55),MLXIPL(-4.26),SLC27A2(-2.29),SNAI1(+2.24),SNAI2(+6.19),THY1(+1.92),TP63(+7.65),WASF3(-1.48)
transcription regulator	HOXA10	3.56e-05			1.137	34	23	11	AQP1(+2.14),BCHE(+2.65),CDKN1A(-2.32),COL15A1(+2.47),COL3A1(+8.18),CTSV(+2.48),CYP2E1(-2.25),EGFR(+2.45),EMX2(-1.97),FN1(+3.0),FZD1(+1.9),HMGCR(-2.13),IGFBP5(+2.03),IL1R1(+1.71),IRX3(+4.51),ITGB3(-2.06),LAMA2(+4.8),MEIS2(+1.86),MICOS10-NBL1/NBL1(+3.39),MYCN(+3.19),PCP4(+2.35),PIK3R1(+2.25),RBP1(+2.01),S100B(+2.47),SAT1(-2.6),SCD(-2.76),SHD(-2.15),SSPN(+1.88),ST6GAL1(+1.6),TGFBR3(-1.91),TNFSF13B(-…
transcription regulator	RBL1	3.63e-05		Inhibited	-2.668	19	16	3	CCNA2(+1.74),CDC25A(+1.75),CDC6(+2.07),CDKN1A(-2.32),DHFR(+1.79),E2F1(+2.7),FOS(+2.02),KRT10(-1.65),MCM10(+2.64),MCM2(+2.05),MCM5(+2.08),MCM7(+1.89),MYBL2(+3.14),MYCN(+3.19),NOTCH1(-1.48),ORC1(+2.7),RRM2(+3.05),SFRP1(+3.48),SKP2(+1.87)
transcription regulator	EGR2	3.69e-05			1.786	31	20	11	ASS1(+2.45),CDKN1A(-2.32),CHRNA7(+1.94),CNGB1(+2.89),CRABP1(-3.88),CYP51A1(-1.69),DDN(+3.16),DHCR7(-1.88),FOS(+2.02),GLRA1(+5.8),GRIA2(+6.74),HMGCR(-2.13),HSPA5(-1.75),KDR(+2.05),KITLG(+2.68),LAMA2(+4.8),MBP(+2.44),MIR17HG(+1.9),NOTCH1(-1.48),NXPH4(+4.48),PLCL1(+2.78),PMP22(+2.85),POLR2C(-1.5),ROBO1(+2.24),SCD(-2.76),SLC1A3(+5.03),SOCS1(+3.16),SOCS3(+2.95),SQLE(-1.72),TFRC(+1.88),TGFBR3(-1.91)
transcription regulator	RB1	3.91e-05		Inhibited	-2.407	65	47	18	APPL2(+1.69),ASF1B(+1.88),ATP1B1(-2.11),BCKDHA(-1.77),BIRC5(+2.19),BNIP3(-1.92),BRCA1(+1.77),BTG3(-2.04),CCNA2(+1.74),CCNB1(+1.58),CDC25A(+1.75),CDC25C(+1.99),CDC6(+2.07),CDH1(+3.1),CDK5R1(+2.97),CDKN1A(-2.32),CENPK(+1.95),CHAF1A(+2.72),CLDN3(-2.47),CYP27B1(-2.51),DDIT3(-2.04),DHFR(+1.79),E2F1(+2.7),E2F3(+1.56),EDNRA(+9.03),EOMES(+2.75),FAM111A(+1.64),FANCA(+2.73),FN1(+3.0),FOS(+2.02),GPR12(+4.43…
transcription regulator	SS18	4.83e-05		Activated	2.111	12	9	3	C11orf96(+3.38),CABP7(+3.49),CACNA1G(+2.29),CAMK2B(+3.05),DLL1(-2.54),MSX1(+6.43),RET(+2.45),SLC16A3(-2.12),SOCS3(+2.95),SOX2(-2.72),SOX8(+2.06),SYNE1(+1.75)
transcription regulator	CCNE1	5.11e-05			1.177	10	9	1	BRCA1(+1.77),CCNA2(+1.74),CCNB1(+1.58),CD44(+3.93),CDC45(+2.65),CDC6(+2.07),CDKN1A(-2.32),E2F1(+2.7),MCM2(+2.05),MCM4(+3.3)
transcription regulator	GSX2	5.31e-05			1.195	7	7	0	ALDH1A3(+3.21),ASCL1(+5.3),DLX2(+2.73),EBF1(+17.28),NEUROD6(+7.64),NEUROG2(+5.17),RBP1(+2.01)
transcription regulator	SOX3	5.34e-05	-2.296	Inhibited	-3.638	19	16	3	ANGPT1(+5.6),APCDD1(+15.97),BMPER(+5.67),COBLL1(+1.75),DLL1(-2.54),EOMES(+2.75),EPHA2(-1.74),FRZB(+4.89),INHBA(+3.11),IRX3(+4.51),LMX1B(+7.02),NRP1(+1.9),PDGFRA(+3.34),POU4F1(+8.63),RET(+2.45),SOX2(-2.72),SOX9(+1.56),WNT3(+2.2),YAP1(+1.52)
transcription regulator	SMAD3	5.47e-05		Activated	3.764	42	33	9	ADAM12(+3.56),ANKRD1(-2.65),ASPN(+14.68),AXIN2(+3.19),CCL2(+2.16),CDH1(+3.1),CDKN1A(-2.32),COL1A1(+3.04),COL2A1(+1.9),COL3A1(+8.18),DDIT3(-2.04),DOCK4(+2.36),FN1(+3.0),FNDC5(+1.74),FOS(+2.02),FZD8(+3.03),GLS(+1.63),HAS2(+4.55),HEY1(+2.26),HSPA5(-1.75),INPP5D(-3.53),ITGB5(+1.71),JAM2(+2.07),MXD1(-1.84),NET1(+2.64),PMEPA1(+3.47),POU5F1(+11.76),S1PR1(-2.26),S1PR3(+1.97),SKIL(+1.48),SMAD7(+1.75),SNAI…
transcription regulator	TAL1	5.86e-05		Activated	2.222	39	30	9	ADCY3(+1.72),ADGRG1(-1.62),ASPM(+2.11),ATP6AP1L(-3.86),CACNG4(+1.92),CALY(-2.89),CCNB1(+1.58),CDH23(-1.49),CDK6(+2.2),CDKN1A(-2.32),CENPU(+2.42),CHRNA5(+2.29),CHST11(+1.74),DOCK1(+1.85),EPOR(-2.66),ETS1(+1.84),FBN1(+1.56),GINS1(+2.07),GUCY1A1(+3.08),HELLS(+1.95),HSD17B14(-2.03),ICAM1(-2.26),KIF15(+1.97),KIF20A(+1.86),LRRN3(+2.19),MCM2(+2.05),MCM4(+3.3),MUC16(+5.63),NCAPG(+1.83),NFKBIZ(+1.86),NOS1…
transcription regulator	SIRT1	5.97e-05			-0.447	57	39	18	ACAP1(-2.03),ADAMTS5(+2.45),ANO1(+5.01),BBC3(-1.77),BIRC5(+2.19),BNIP3(-1.92),BTRC(+1.67),CD72(-2.04),CDH1(+3.1),CDKN1A(-2.32),CMPK2(+2.05),CNR1(+8.01),CYP1A1(+5.71),DDAH2(-1.51),DDX60(+2.55),EPAS1(+2.73),FGFR3(-2.34),FN1(+3.0),FOXO1(+2.33),HES5(-2.3),HMGCR(-2.13),ICAM1(-2.26),IFI44(+4.26),KALRN(+2.8),KCNA1(+2.6),KLF2(+3.29),LDLR(-1.85),LTBP2(+1.8),LY6E(+1.59),MAPT(+3.09),MMP2(+2.64),MYT1(+2.81),…
transcription regulator	E2F3	6.03e-05	1.561	Activated	2.567	33	30	3	BIRC5(+2.19),BOK(+2.12),CCNA2(+1.74),CCNB1(+1.58),CDC25A(+1.75),CDC45(+2.65),CDC6(+2.07),CDCA3(+1.93),CDKN1A(-2.32),DHFR(+1.79),E2F1(+2.7),E2F2(+4.11),E2F3(+1.56),FBLN5(+3.95),HIST1H3D(+2.41),INHBA(+3.11),JAM2(+2.07),LPL(-2.98),MCM10(+2.64),MCM2(+2.05),MCM4(+3.3),MCM5(+2.08),MCM7(+1.89),MIR17HG(+1.9),MYBL2(+3.14),MYCN(+3.19),ORC1(+2.7),PLCB4(+1.56),PTN(+2.21),RRM2(+3.05),TENT5A(+2.43),TK1(+3.69),…
transcription regulator	NFKBIA	6.84e-05		Activated	2.038	65	49	16	A2M(+4.05),ADAMTS5(+2.45),ANKRD1(-2.65),AXL(-1.57),BCL11A(+3.04),BNIP3(-1.92),BOK(+2.12),BRF2(-2.19),BUB1B(+1.96),CCL2(+2.16),CCNA2(+1.74),CCNB1(+1.58),CDC25A(+1.75),CDC25B(+2.16),CDC45(+2.65),CDC6(+2.07),CDH1(+3.1),CDKN1A(-2.32),CEBPD(+2.36),COL2A1(+1.9),COL3A1(+8.18),CXCR4(+2.78),CYP1B1(+2.61),DCN(+24.15),DDIT3(-2.04),EOMES(+2.75),FHL2(+2.13),FN1(+3.0),FOS(+2.02),FOXF2(+7.89),FOXM1(+2.16),GM2A(…
transcription regulator	FEV	6.96e-05		Activated	3.564	20	17	3	ANXA2(+1.65),CHGB(+5.21),CNTN1(+3.34),CXCR4(+2.78),FOS(+2.02),GRIA4(+2.25),ICAM1(-2.26),JAM2(+2.07),NCALD(+1.86),NFIA(+5.99),NFIX(+13.48),NMNAT2(+2.55),NR2F2(-2.13),NTN1(+2.48),RORB(+4.44),SCN3B(+2.4),SLC17A8(+2.7),SLC1A3(+5.03),SLIT2(-1.78),SOX9(+1.56)
transcription regulator	AIP	7.98e-05			0.545	14	13	1	AHR(+3.68),BIRC5(+2.19),CHRM2(+1.92),CYP1A1(+5.71),CYP1B1(+2.61),GNG4(+2.26),GPRC5A(+1.9),NPR3(+2.96),PDE3A(+5.5),PLAGL1(+1.91),RASGRP1(+2.36),RGS4(+5.61),RGS7(+4.3),S1PR1(-2.26)
transcription regulator	SMAD2	8.27e-05			1.595	20	15	5	ADAM12(+3.56),CDH1(+3.1),CDKN1A(-2.32),COL2A1(+1.9),FN1(+3.0),HAS2(+4.55),INPP5D(-3.53),IRX1(+2.66),MMP2(+2.64),NET1(+2.64),NOS3(-5.35),POU5F1(+11.76),S1PR1(-2.26),SKIL(+1.48),SMAD7(+1.75),SNAI1(+2.24),SNAI2(+6.19),SOX2(-2.72),SPHK1(+1.74),VEGFC(+2.34)
transcription regulator	NFYA	8.27e-05			-0.588	20	12	8	BBC3(-1.77),CBS/CBSL(+2.37),CCNA2(+1.74),CCNB1(+1.58),CDC25B(+2.16),CDC25C(+1.99),CDKN1A(-2.32),CYP1A1(+5.71),E2F1(+2.7),HSD17B7(-2.16),HSPA5(-1.75),ICAM1(-2.26),IRF1(+1.72),NOTCH1(-1.48),PGK1(-1.73),PKM(+1.93),RGS4(+5.61),RRM2(+3.05),SCD(-2.76),TGFBR2(+2.5)
transcription regulator	FOXO4	8.64e-05			0.101	21	8	13	ANGPT1(+5.6),BNIP3(-1.92),CDC42EP3(+2.0),CDKN1A(-2.32),CYP51A1(-1.69),EDNRB(-4.04),ELOVL5(-2.06),FABP5(+2.52),FDFT1(-2.01),FOXC1(+7.92),HMGCR(-2.13),HMGCS1(-2.27),IDI1(-2.27),IL1R1(+1.71),LRAT(+2.39),PTGS1(-2.59),PTPRC(+4.87),S1PR3(+1.97),SCD(-2.76),SREBF2(-1.62),TIE1(-5.72)
transcription regulator	CREBBP	8.68e-05			0.66	59	46	13	ADAM12(+3.56),ADCYAP1(+4.25),ANGPT1(+5.6),BIRC5(+2.19),CAMK2B(+3.05),CD44(+3.93),CDC42EP3(+2.0),CDC6(+2.07),CDH1(+3.1),CDKN1A(-2.32),COL2A1(+1.9),CRISPLD2(+7.46),CXCR4(+2.78),CYP24A1(+8.89),DCX(+1.97),DHFR(+1.79),EDARADD(+3.77),EOMES(+2.75),FDPS(-1.71),FGFR3(-2.34),FOS(+2.02),FOSL2(+1.73),GM2A(-1.66),GNG2(+1.65),GRIA2(+6.74),GRIN2C(-2.81),HAS2(+4.55),HMGCS1(-2.27),IRF1(+1.72),IRF6(+2.66),ITGA9(+2…
transcription regulator	CEBPB	8.89e-05			1.903	62	41	21	APCDD1(+15.97),CCL2(+2.16),CCNA2(+1.74),CDC25A(+1.75),CDC25B(+2.16),CDC25C(+1.99),CDC42EP3(+2.0),CDC45(+2.65),CDC6(+2.07),CDKN1A(-2.32),CDO1(-1.69),CEBPD(+2.36),CLPP(-1.95),COL1A1(+3.04),CTSC(+2.16),CXCR4(+2.78),CYP1A1(+5.71),CYP24A1(+8.89),CYP27B1(-2.51),CYP2E1(-2.25),DAB2(+1.76),DCN(+24.15),DDIT3(-2.04),DHCR7(-1.88),DHFR(+1.79),E2F1(+2.7),E2F3(+1.56),FBLN1(+4.81),FHL2(+2.13),FOS(+2.02),FTL(-2.2…
transcription regulator	FOXC2	0.000101			0.141	15	9	6	CDH1(+3.1),CXCR4(+2.78),DLL1(-2.54),FN1(+3.0),HES5(-2.3),ITGB3(-2.06),ITGB5(+1.71),KDR(+2.05),LEF1(+2.55),LPL(-2.98),MMP2(+2.64),NOTCH1(-1.48),SLC2A4(-2.3),SNAI1(+2.24),TBX1(+5.18)
transcription regulator	PITX2	0.000115			1.241	25	21	4	ATP1B1(-2.11),CACNA1G(+2.29),CDH1(+3.1),DACT2(+5.62),DLX2(+2.73),EOMES(+2.75),FOXO1(+2.33),HCN4(+2.06),HMX1(+8.08),HPGD(+5.34),IRF6(+2.66),ISL1(+4.84),LEF1(+2.55),NDUFB4(-1.69),OXNAD1(-2.11),SHOX2(+5.67),SNAI1(+2.24),SOX2(-2.72),TBX1(+5.18),TBX15(+11.61),TBX2(+2.41),TBX3(+6.55),WNT2B(+1.89),WNT6(+3.83),WNT9A(+2.73)
transcription regulator	TFAP4	0.000117			1.22	12	8	4	CD44(+3.93),CDH1(+3.1),CDKN1A(-2.32),CLDN1(+1.7),FN1(+3.0),FOS(+2.02),GDF15(-5.46),LEF1(+2.55),LGR5(-3.4),PHYHIP(-2.23),RPE65(+4.13),SNAI1(+2.24)
transcription regulator	GMNN	0.000131		Inhibited	-2.688	19	15	4	ANGPT1(+5.6),APCDD1(+15.97),BMPER(+5.67),CDH1(+3.1),CDKN1A(-2.32),COBLL1(+1.75),EOMES(+2.75),EPHA2(-1.74),FRZB(+4.89),INHBA(+3.11),IRX3(+4.51),NRP1(+1.9),PDGFRA(+3.34),PHYHIP(-2.23),POU4F1(+8.63),POU5F1(+11.76),SOX2(-2.72),WNT3(+2.2),YAP1(+1.52)
transcription regulator	ZBED6	0.000135		Inhibited	-2.121	11	9	2	ANKRD50(+1.66),COL13A1(+2.88),DDIT4(-1.74),DLGAP5(+1.73),FOSL2(+1.73),KITLG(+2.68),NASP(+2.47),PMEPA1(+3.47),PPAT(-1.89),SPTBN1(+1.85),WWTR1(+2.19)
transcription regulator	TCF7L2	0.000143		Activated	2.543	51	37	14	ACADL(+2.1),ACSL3(-1.86),ADGRG1(-1.62),ARAP2(+1.94),AXIN2(+3.19),BIRC5(+2.19),BMP4(+1.85),CDKN1A(-2.32),CREB3L2(+1.81),CTNNAL1(+1.6),CYP2C8(+2.62),CYP2E1(-2.25),CYP51A1(-1.69),DOCK10(+2.67),DOCK9(+1.6),EGFR(+2.45),ENPP4(-3.48),EPAS1(+2.73),EPHB1(+2.81),ERBB3(+2.29),HHIP(+2.74),KLHL4(+6.73),LBH(+1.99),LEF1(+2.55),LPAR3(-2.46),MAP4K4(+1.66),MAP7(+1.9),MBP(+2.44),NFASC(+2.51),NKAIN1(+2.23),NPC1(-2.2…
transcription regulator	JUN	0.000144		Activated	2.379	66	52	14	A2M(+4.05),ACP5(-2.76),ANGPTL2(+2.25),ANXA2(+1.65),APEX1(+1.71),AXL(-1.57),BBC3(-1.77),BRCA1(+1.77),CALM1 (includes others)(+1.49),CCL2(+2.16),CCN3(+4.98),CCNA2(+1.74),CD44(+3.93),CDH1(+3.1),CDK5R1(+2.97),CDKN1A(-2.32),CHGA(+14.1),CHL1(+2.12),CMTM5(-2.58),COL1A1(+3.04),CYP1B1(+2.61),EGFR(+2.45),EHD4(-2.45),FBLN5(+3.95),FN1(+3.0),FOS(+2.02),FOXC1(+7.92),FRZB(+4.89),FUS(+1.71),GAP43(+4.63),HEY1(+2.…
transcription regulator	SIX5	0.000153		Activated	2.985	9	9	0	COL9A2(+2.15),EBF2(+3.88),FZD8(+3.03),IGFBP5(+2.03),MDFI(+2.04),PTN(+2.21),SIX4(+1.59),ST14(+2.43),WNT4(+6.53)
transcription regulator	SMAD7	0.000187	1.752		-1.022	28	23	5	BMP5(+3.06),BMPR1B(-2.97),BMPR2(+2.38),CCL2(+2.16),CCNA2(+1.74),CCNB1(+1.58),CDC25C(+1.99),CDKN1A(-2.32),COL1A1(+3.04),COL2A1(+1.9),COL3A1(+8.18),DCN(+24.15),DNMT3B(+2.47),FN1(+3.0),FOXO1(+2.33),ICAM1(-2.26),LTBP2(+1.8),LTBP3(+2.15),MMP2(+2.64),NET1(+2.64),PMEPA1(+3.47),POU5F1(+11.76),SCD(-2.76),SMAD7(+1.75),SOX2(-2.72),SOX9(+1.56),TGFB3(+5.19),TGFBR2(+2.5)
transcription regulator	SP100	0.000213				8	5	3	BRCA1(+1.77),CDKN1A(-2.32),FOS(+2.02),GABRE(+2.41),ICAM1(-2.26),PLAU(-2.34),SNAI1(+2.24),THY1(+1.92)
transcription regulator	MED1	0.000219		Activated	2.539	29	21	8	BCL11A(+3.04),BIRC5(+2.19),CCNB1(+1.58),CDC6(+2.07),CDKN1A(-2.32),CENPA(+2.09),CHAF1A(+2.72),CYP1A1(+5.71),CYP24A1(+8.89),E2F1(+2.7),EBF1(+17.28),FADS2(-1.92),FOXM1(+2.16),FOXO1(+2.33),HAS2(+4.55),INSM1(+4.66),KLF4(+1.98),LEF1(+2.55),MYCN(+3.19),ODC1(-1.74),POU5F1(+11.76),PRLR(+2.46),SALL4(-2.67),SEPT6(+1.91),SLC2A4(-2.3),SOX2(-2.72),STC2(-2.04),TBX3(+6.55),TNNT1(-3.41)
transcription regulator	MYOD1	0.000242			1.184	33	21	12	ALDOA(-1.51),ASS1(+2.45),BRCA1(+1.77),CDC6(+2.07),CDKN1A(-2.32),CDKN1C(-1.78),CDO1(-1.69),DHFR(+1.79),ENO3(-3.41),ETV4(+2.16),FNDC5(+1.74),HES6(+2.18),IFI16(+2.82),IGFBP5(+2.03),IRX1(+2.66),LZTS3(-1.78),MAFB(+3.39),MAP2K1(-1.55),MKI67(+2.36),MMP2(+2.64),PAX3(+2.67),PMEPA1(+3.47),PRDM16(-1.93),RECK(+1.96),RUNX1(+5.8),RYR1(-3.07),SIX1(+10.7),SLC2A4(-2.3),SMAD7(+1.75),SPTBN1(+1.85),TGFBR3(-1.91),TNN…
transcription regulator	EMX2	0.000273	-1.973		0.537	5	4	1	CALB2(+6.38),EGFR(+2.45),RELN(+1.99),SOX2(-2.72),WNT1(+3.45)
transcription regulator	SATB2	0.000277	2.981		-0.16	7	5	2	AUTS2(+3.63),BBC3(-1.77),BCL11B(+4.28),BHLHE22(+5.15),NEUROD6(+7.64),SPP1(-3.22),TBR1(+4.5)
transcription regulator	E2F7	0.000277				7	7	0	CCNA2(+1.74),CCNB1(+1.58),CDC6(+2.07),DHFR(+1.79),E2F1(+2.7),E2F2(+4.11),E2F3(+1.56)
transcription regulator	SNAI2	0.000285	6.186		-0.535	15	12	3	ANKRD1(-2.65),AXL(-1.57),BBC3(-1.77),CDH1(+3.1),CLDN1(+1.7),COL1A1(+3.04),COL2A1(+1.9),CXCR4(+2.78),FN1(+3.0),HPGD(+5.34),ITGB4(+1.99),SNAI2(+6.19),SOX9(+1.56),TP63(+7.65),TRPS1(+1.79)
transcription regulator	NEUROD4	0.000316	11.656		-1	4	2	2	DLL1(-2.54),DLL3(+3.98),HES5(-2.3),HEY2(+4.4)
transcription regulator	FOXD3	0.000319			-0.218	6	4	2	CDKN1A(-2.32),CXCR4(+2.78),FOXM1(+2.16),POU5F1(+11.76),SKP2(+1.87),SOX2(-2.72)
transcription regulator	SOX4	0.000323			1.926	32	28	4	AMOTL1(+1.8),BBC3(-1.77),BIRC5(+2.19),BMPR2(+2.38),CCN3(+4.98),CLIC6(+1.86),CNRIP1(+3.75),DDAH2(-1.51),EMP1(+1.7),EOMES(+2.75),FN1(+3.0),FOS(+2.02),GRIA2(+6.74),LMO7(+1.86),LRRN3(+2.19),MAP7(+1.9),MBP(+2.44),NREP(+1.77),NUAK1(+2.04),P2RX3(+6.68),PARD6G(+1.6),PLEKHA1(-1.71),RNF144A(+1.72),SLC17A8(+2.7),ST6GAL1(+1.6),TDRKH(-4.29),TENM4(+3.27),TES(+2.48),TMEM131L(+1.98),TMEM98(+1.58),TPH1(+6.4),TRMT…
transcription regulator	IKZF1	0.000354			-0.841	27	19	8	AQP1(+2.14),AXL(-1.57),C1QTNF1(+4.31),CDH22(+3.91),CDK6(+2.2),CDKN1A(-2.32),DOCK1(+1.85),DOCK9(+1.6),EBF1(+17.28),EMP1(+1.7),EPOR(-2.66),EXOC3L1(-2.96),FGFR1(+1.86),FOXO1(+2.33),GP1BA(-2.63),IFI16(+2.82),KITLG(+2.68),LHFPL2(+2.67),LMO2(+2.46),NFIX(+13.48),NOTCH1(-1.48),PTH1R(+1.87),RAPGEF4(+2.61),RHCE/RHD(-9.84),RUNX1(+5.8),SPN(-2.84),WNT10B(+2.6)
transcription regulator	EGR1	0.000356			0.742	32	22	10	CCL2(+2.16),CD44(+3.93),CDH1(+3.1),CDK5R1(+2.97),CDKN1A(-2.32),CHGA(+14.1),CHGB(+5.21),CHRNA7(+1.94),COL1A1(+3.04),COL2A1(+1.9),EGFR(+2.45),FN1(+3.0),FTL(-2.22),GDF15(-5.46),GRIA1(+1.96),HMGCR(-2.13),HPGD(+5.34),ICAM1(-2.26),LDLR(-1.85),MAOB(+1.93),MXD1(-1.84),PCSK2(+10.15),PLAU(-2.34),SNAI1(+2.24),SNAI2(+6.19),SOCS1(+3.16),SPP1(-3.22),SQLE(-1.72),SV2C(+4.32),TGFBR2(+2.5),TH(+10.96),WNT4(+6.53)
transcription regulator	NOTCH3	0.000374			1.201	14	9	5	BIRC5(+2.19),CDH1(+3.1),CDKN1A(-2.32),CDKN1C(-1.78),COL5A1(+2.19),DLGAP5(+1.73),FN1(+3.0),HES5(-2.3),HEY1(+2.26),HEY2(+4.4),MSI1(-1.68),NOTCH1(-1.48),RGS5(+3.25),SNAI2(+6.19)
transcription regulator	HSF1	0.000393			0.908	33	22	11	BMP4(+1.85),BST2(-3.56),BUB1B(+1.96),CCNA2(+1.74),CDC6(+2.07),COL6A2(+1.72),DEDD2(-2.15),FBLN1(+4.81),FGF1(+2.78),FOXM1(+2.16),HMGB1(+1.72),HSPA1A/HSPA1B(-1.64),ICAM1(-2.26),INHBB(+5.09),ITGB5(+1.71),JMJD6(-1.9),LDLR(-1.85),LRIF1(-1.85),MAPT(+3.09),MICA(-3.72),MITF(+1.92),MMP19(+2.28),MRPL18(-2.02),NFATC2(+2.1),PGK1(-1.73),POU5F1(+11.76),PPP3CA(+2.76),PROM2(-2.06),SNCAIP(+5.11),TEX15(+3.03),TRAF3…
transcription regulator	HMGA1	0.000396			0.453	27	17	10	BRCA1(+1.77),CD44(+3.93),CLCN6(-2.63),COL1A1(+3.04),CTSC(+2.16),DAB2(+1.76),DDIT3(-2.04),DHCR7(-1.88),DPYSL4(+1.81),FOS(+2.02),FOSL2(+1.73),H19(+1.99),HMGCR(-2.13),IDI1(-2.27),IGFALS(-2.66),INSIG1(-2.21),KITLG(+2.68),KLF2(+3.29),KRT10(-1.65),LAMB1(+1.98),LY6E(+1.59),MAPT(+3.09),NFIX(+13.48),PTH1R(+1.87),SLC27A2(-2.29),SOD3(-2.52),WNT6(+3.83)
transcription regulator	TWIST2	0.000405			0.464	11	9	2	BCL11A(+3.04),CD44(+3.93),CDH1(+3.1),CDKN1A(-2.32),FBLN5(+3.95),FN1(+3.0),H19(+1.99),MYCN(+3.19),SNAI1(+2.24),SNAI2(+6.19),SOX2(-2.72)
transcription regulator	PDX1	0.000432			1.722	32	22	10	ANXA2(+1.65),ATF5(+2.66),BBC3(-1.77),CD44(+3.93),CDO1(-1.69),CHGB(+5.21),COL1A1(+3.04),COL25A1(+3.53),COL3A1(+8.18),CXCR4(+2.78),DAPK3(-1.54),EPHB1(+2.81),FGF1(+2.78),FGFR1(+1.86),GAP43(+4.63),HAP1(-2.4),HSPA5(-1.75),INSIG1(-2.21),MAOB(+1.93),MAPT(+3.09),MITF(+1.92),NPTX2(+2.67),PNPO(-3.4),PPP2R2C(+2.46),RABGAP1L(+1.71),RHOBTB1(+1.57),SEZ6L(+14.9),SPP1(-3.22),ST18(+4.07),TGFBR3(-1.91),TIPRL(-1.68…
transcription regulator	PAX3	0.000432	2.673		1.874	33	31	2	ASS1(+2.45),BMP4(+1.85),BST2(-3.56),CAPN1(+1.7),CDC6(+2.07),CDKN1A(-2.32),CHRNA5(+2.29),CNR1(+8.01),CXCR4(+2.78),CYP1B1(+2.61),DCT(+10.71),DLX2(+2.73),GUCY1A1(+3.08),LAMB3(+4.06),MCC(+2.27),MDFI(+2.04),MEOX1(+2.78),MITF(+1.92),NNMT(+3.12),OLFM1(+3.09),PAX3(+2.67),PCSK2(+10.15),PKIA(+1.77),RAB31(+2.32),RET(+2.45),RUNX3(+7.22),SFN(+4.58),SIX1(+10.7),SRSF3(+1.7),ST8SIA2(+2.17),TNC(+2.03),VCAN(+3.16)…
transcription regulator	KDM4A	0.000434			-0.816	7	3	4	CDKN1A(-2.32),CHD5(+3.82),JPT1(+1.8),PIM3(-1.73),POU5F1(+11.76),SOX2(-2.72),TTYH1(-1.97)
transcription regulator	MXI1	0.000434			-1.532	7	5	2	APEX1(+1.71),CCNB1(+1.58),FOXM1(+2.16),IFT20(-1.73),MKI67(+2.36),MYCN(+3.19),ODC1(-1.74)
transcription regulator	FOXC1	0.000458	7.915		-0.055	8	4	4	CXCR4(+2.78),DLL1(-2.54),FOXO1(+2.33),HES5(-2.3),ITGB3(-2.06),NOTCH1(-1.48),SNAI2(+6.19),TBX1(+5.18)
transcription regulator	HLX	0.000493			-0.626	10	6	4	ANKRD1(-2.65),CCNB1(+1.58),CD44(+3.93),CDKN1C(-1.78),CLDN1(+1.7),CYP1B1(+2.61),GDF15(-5.46),ICAM1(-2.26),PAPPA(+1.92),THY1(+1.92)
transcription regulator	ID4	0.000547				6	4	2	BBC3(-1.77),BRCA1(+1.77),CDH1(+3.1),CDKN1A(-2.32),E2F1(+2.7),MMP2(+2.64)
transcription regulator	MYB	0.000547		Activated	2.426	24	19	5	AXIN2(+3.19),BIRC5(+2.19),BRCA1(+1.77),CAMK2B(+3.05),CCNB1(+1.58),CDH1(+3.1),CXCR4(+2.78),FN1(+3.0),HSPA5(-1.75),IGFBP5(+2.03),KDR(+2.05),KITLG(+2.68),KLF4(+1.98),MTSS1(+1.87),NOTCH1(-1.48),PPP3CA(+2.76),SLC27A2(-2.29),SNAI1(+2.24),SNAI2(+6.19),SOCS2(+3.94),SOX2(-2.72),SPHK1(+1.74),SPP1(-3.22),TFEC(+5.75)
transcription regulator	LEF1	0.000592	2.546		1.321	15	13	2	AXIN2(+3.19),BIRC5(+2.19),CACNA1G(+2.29),CD44(+3.93),CDH1(+3.1),CDKN1A(-2.32),CXCR4(+2.78),DCT(+10.71),FN1(+3.0),HAS2(+4.55),LEF1(+2.55),MITF(+1.92),MMP2(+2.64),SOX9(+1.56),SPP1(-3.22)
transcription regulator	SMARCA2	0.000592	1.747	Activated	2.424	15	13	2	BMPR1B(-2.97),CD44(+3.93),CDH1(+3.1),DCT(+10.71),DHFR(+1.79),E2F1(+2.7),HES5(-2.3),IGFBP5(+2.03),KDR(+2.05),MSX1(+6.43),MYT1L(+13.02),NME1(+1.93),RRM2(+3.05),TBX2(+2.41),TYR(+6.76)
transcription regulator	OTX2	0.000592		Activated	2.746	15	12	3	A2M(+4.05),BMP4(+1.85),DCT(+10.71),FLVCR2(+2.25),MITF(+1.92),RDH10(+5.3),SIX3(-4.44),SLC39A12(+3.94),SOX2(-2.72),SREBF2(-1.62),STRA6(+2.0),TDGF1(+5.05),TNC(+2.03),TYR(+6.76),WNT1(+3.45)
transcription regulator	GATA4	0.000623			-0.071	33	22	11	ANKRD1(-2.65),ASCL1(+5.3),CACNA1C(+3.21),CCL2(+2.16),CLDN1(+1.7),COL1A1(+3.04),COL3A1(+8.18),CRABP2(-1.58),CXCR4(+2.78),DAB2(+1.76),EMX2(-1.97),EPHB1(+2.81),EPOR(-2.66),ESPL1(+2.25),FOS(+2.02),FSTL4(+4.57),HSPA5(-1.75),IFI16(+2.82),INHBB(+5.09),IRF6(+2.66),KCNA5(+3.67),KRT17(+7.24),LHX5(-1.77),LTBP2(+1.8),MYL7(-2.43),NFATC2(+2.1),NPPB(-2.63),PTGS1(-2.59),RYR2(+2.81),SGPL1(+1.69),SOX9(+1.56),SPP1(…
transcription regulator	SREBF1	0.000706		Inhibited	-3.549	39	10	29	ADGRG1(-1.62),ALDOA(-1.51),ALDOC(-3.65),ARF4(-2.49),CAMK1D(+1.93),CDKN1A(-2.32),CEBPD(+2.36),CFI(+2.44),CHMP2A(-1.77),CYP27B1(-2.51),CYP51A1(-1.69),DHCR7(-1.88),FABP5(+2.52),FADS1(-1.71),FADS2(-1.92),FDFT1(-2.01),FDPS(-1.71),FN1(+3.0),FOXO1(+2.33),HMGCR(-2.13),HMGCS1(-2.27),HSPA1A/HSPA1B(-1.64),HSPA5(-1.75),IDI1(-2.27),INSIG1(-2.21),LDLR(-1.85),LPL(-2.98),MSMO1(-2.26),NPC1(-2.23),PCSK9(+6.83),PIK…
transcription regulator	ARID1A	0.000774		Inhibited	-2.783	9	8	1	AXIN2(+3.19),BMP4(+1.85),CDKN1A(-2.32),FZD1(+1.9),SOX9(+1.56),WNT2B(+1.89),WNT3(+2.2),WNT4(+6.53),WNT6(+3.83)
transcription regulator	NEUROG2	0.000884	5.175		1	6	5	1	CDK5R1(+2.97),DCX(+1.97),DLL1(-2.54),INSM2(+5.63),IRX3(+4.51),YAP1(+1.52)
transcription regulator	HNRNPD	0.000884				6	3	3	CDKN1A(-2.32),FOS(+2.02),KLF2(+3.29),LDLR(-1.85),PENK(+36.26),TERC(-2.48)
transcription regulator	MECOM	0.000893			0	8	5	3	CALY(-2.89),CDKN1A(-2.32),DCN(+24.15),E2F1(+2.7),ITGB3(-2.06),ITGB4(+1.99),SKIL(+1.48),ZFPM2(+7.36)
transcription regulator	TBXT	0.000956		Activated	2.433	7	7	0	ALCAM(+3.09),CD44(+3.93),COL1A1(+3.04),COL2A1(+1.9),KDR(+2.05),MITF(+1.92),SOX9(+1.56)
transcription regulator	MYOCD	0.00109	2.221		-0.527	18	12	6	CACNA1C(+3.21),CALD1(+1.68),CDKN1A(-2.32),COL1A1(+3.04),COL2A1(+1.9),COL3A1(+8.18),DDIT3(-2.04),EIF2AK3(-2.83),FN1(+3.0),FOS(+2.02),HCN4(+2.06),HEY2(+4.4),MYL7(-2.43),NFATC2(+2.1),NPPB(-2.63),SCN9A(+11.17),SREBF2(-1.62),VCAN(+3.16)
transcription regulator	CLOCK	0.00111		Inhibited	-2.6	39	23	16	CALD1(+1.68),CEMIP(+3.39),CHRNA7(+1.94),CYP51A1(-1.69),DDIT3(-2.04),EGFR(+2.45),FGF1(+2.78),GNAO1(+2.29),HAS2(+4.55),HES6(+2.18),ICAM1(-2.26),IGFBP5(+2.03),ITM2C(+1.73),JMJD6(-1.9),KANK2(+2.08),KCND3(+5.42),KCNS1(+5.18),KIF20A(+1.86),LIX1(-1.97),LYPD6(+1.66),MKNK2(-1.61),MOXD1(+4.51),MSMO1(-2.26),NADK2(-1.64),NEFM(+3.6),NOLC1(-1.5),NR1D1(-2.39),OPN3(+2.0),PDP2(-2.23),PER1(-2.15),PRELID3B(-1.79),R…
transcription regulator	RUNX2	0.00125			0.797	22	18	4	AXIN2(+3.19),BIRC5(+2.19),C4A/C4B(+2.69),CDH1(+3.1),CDKN1A(-2.32),CEBPD(+2.36),COL1A1(+3.04),DPYSL3(+1.96),FN1(+3.0),ISL1(+4.84),ITGB4(+1.99),LEF1(+2.55),MKI67(+2.36),MMP2(+2.64),NUDT12(-2.24),PLAU(-2.34),RUNX1(+5.8),SNAI1(+2.24),SNAI2(+6.19),SOST(+3.32),SPP1(-3.22),WNT10B(+2.6)
transcription regulator	MSX2	0.00133			-0.379	10	6	4	BMP4(+1.85),LEF1(+2.55),PTH1R(+1.87),SIX3(-4.44),SPP1(-3.22),TGFB3(+5.19),TP63(+7.65),WNT3A(+1.77),WNT7A(-2.36),WNT7B(-2.48)
transcription regulator	NCOA3	0.00133			0.792	16	12	4	AHR(+3.68),CCDC80(+1.98),CCNA2(+1.74),CCNB1(+1.58),CDC25A(+1.75),CDC6(+2.07),CDKN1A(-2.32),CYP1A1(+5.71),E2F1(+2.7),EOMES(+2.75),HES5(-2.3),IRF1(+1.72),KDR(+2.05),MCM7(+1.89),PGK1(-1.73),SLC16A3(-2.12)
transcription regulator	ATF4	0.00135			-0.18	27	16	11	ANKRD1(-2.65),APBA3(-1.67),APEX1(+1.71),ATF5(+2.66),BBC3(-1.77),CCL2(+2.16),CDKN1A(-2.32),DDIT3(-2.04),DDIT4(-1.74),DDR2(+4.69),FN1(+3.0),GDF15(-5.46),HERPUD1(-1.74),HSPA5(-1.75),IGFBP5(+2.03),KLF4(+1.98),MITF(+1.92),OSMR(+3.39),PENK(+36.26),PMP22(+2.85),PRKN(+2.22),SERPINF1(+1.8),SLC6A9(+2.58),SLC7A11(+3.3),SNAI2(+6.19),STC2(-2.04),TNFRSF10B(-1.99)
transcription regulator	DACH1	0.00165		Inhibited	-2.138	10	7	3	BMP4(+1.85),CDC25A(+1.75),CDKN1A(-2.32),FGFR1(+1.86),FOS(+2.02),KLF4(+1.98),POU5F1(+11.76),RELN(+1.99),SOX2(-2.72),STC2(-2.04)
transcription regulator	ETS2	0.0018	2.507		0.607	15	9	6	BMP4(+1.85),BRCA1(+1.77),CDKN1A(-2.32),FGF1(+2.78),FOS(+2.02),HPGD(+5.34),ICAM1(-2.26),MKX(+3.01),PCSK6(+3.65),PLAU(-2.34),SOX2(-2.72),SPP1(-3.22),TFEC(+5.75),TGFBR2(+2.5),TIE1(-5.72)
transcription regulator	SCX	0.00188			-1.83	7	6	1	COL1A1(+3.04),MSX1(+6.43),SNAI1(+2.24),SNAI2(+6.19),SOX9(+1.56),SPP1(-3.22),TNC(+2.03)
transcription regulator	SMAD4	0.00193		Activated	2.54	36	27	9	ANGPT1(+5.6),BBC3(-1.77),BMP4(+1.85),CCL2(+2.16),CDC42EP3(+2.0),CDH1(+3.1),CDKN1A(-2.32),COL2A1(+1.9),DOCK4(+2.36),EGFR(+2.45),ERCC5(-1.9),FGFR3(-2.34),FN1(+3.0),FOS(+2.02),GCNT1(-2.78),HAS2(+4.55),HMGA2(+2.05),ICAM1(-2.26),INPP5D(-3.53),ITGB5(+1.71),JAM2(+2.07),LEF1(+2.55),MYCN(+3.19),PLAU(-2.34),PTPRC(+4.87),RUNX1(+5.8),RUNX3(+7.22),SCD(-2.76),SKIL(+1.48),SMAD7(+1.75),SNAI1(+2.24),SNAI2(+6.19),…
transcription regulator	MESP1	0.00201		Activated	2.414	6	6	0	FOXC1(+7.92),MEIS2(+1.86),MYOCD(+2.22),PRICKLE1(+7.39),SNAI1(+2.24),SNAI2(+6.19)
transcription regulator	CBX4	0.00201				6	6	0	CCNB1(+1.58),CDC25A(+1.75),CDC6(+2.07),DHFR(+1.79),ORC1(+2.7),WNT4(+6.53)
transcription regulator	RRP1B	0.00203				20	18	2	ASCL1(+5.3),BIRC5(+2.19),BRCA1(+1.77),CCNA2(+1.74),CDC25C(+1.99),CDC6(+2.07),CDKN1A(-2.32),CYP24A1(+8.89),DHFR(+1.79),ESPL1(+2.25),FOXO1(+2.33),ITGB5(+1.71),MCM2(+2.05),MCM4(+3.3),MCM5(+2.08),MRAS(+1.91),ORC1(+2.7),PRKD1(+2.06),SPP1(-3.22),VEGFC(+2.34)
transcription regulator	KLF5	0.0021			0.421	13	8	5	BIRC5(+2.19),CCNA2(+1.74),CCNB1(+1.58),CDH1(+3.1),CDKN1A(-2.32),CXCR4(+2.78),E2F3(+1.56),EPAS1(+2.73),NOTCH1(-1.48),PREB(-1.63),RUNX1(+5.8),SLC35F6(-1.69),SOX2(-2.72)
transcription regulator	ATOH1	0.00211			0.693	8	6	2	CUX2(+1.74),DLL1(-2.54),HES5(-2.3),MGAT5B(+2.29),NOS1(+2.43),PCP4(+2.35),SLC17A6(+7.47),SRRM4(+5.26)
transcription regulator	STAT5B	0.00235			-0.547	41	31	10	A2M(+4.05),ANKRD1(-2.65),ANKS1B(+2.02),BMF(+1.59),CCDC141(+4.04),CDH1(+3.1),CDK6(+2.2),CDKN1A(-2.32),CDO1(-1.69),CISH(+2.15),CUX2(+1.74),CYP2C8(+2.62),DDIT3(-2.04),EBF1(+17.28),EGFR(+2.45),FAM89A(+1.95),FBLN1(+4.81),FOS(+2.02),FOSL2(+1.73),IGFALS(-2.66),IRF1(+1.72),MOXD1(+4.51),MYL7(-2.43),NNMT(+3.12),NOL3(-2.32),OMD(+3.88),PDZRN3(+2.24),PRLR(+2.46),SCD(-2.76),SH3RF3(+3.25),SOCS1(+3.16),SOCS2(+3.…
transcription regulator	RNF2	0.00246			1.491	13	10	3	CDKN1A(-2.32),CLVS2(+6.03),EOMES(+2.75),GDF15(-5.46),HEY2(+4.4),MCC(+2.27),MSX1(+6.43),PAX3(+2.67),PDGFRA(+3.34),POU5F1(+11.76),REC8(-1.86),TMEFF2(+3.08),WNT1(+3.45)
transcription regulator	WT1	0.0025			1.316	35	22	13	CBS/CBSL(+2.37),CCL2(+2.16),CDC45(+2.65),CDH1(+3.1),CDKN1A(-2.32),CLIC4(+1.64),CTSV(+2.48),EGFR(+2.45),ENO2(-1.81),EPOR(-2.66),ETS1(+1.84),FDFT1(-2.01),FDPS(-1.71),FGF1(+2.78),FGFR1(+1.86),HCFC1R1(-1.61),IDI1(-2.27),KLF4(+1.98),MMP2(+2.64),MYCN(+3.19),NME1(+1.93),ODC1(-1.74),PHLDA1(+1.75),PIR(-2.59),SEC13(-1.72),SLC15A2(-2.8),SNAI2(+6.19),SOX9(+1.56),SQLE(-1.72),SREBF2(-1.62),ST6GAL1(+1.6),TFAP2A…
transcription regulator	EED	0.00251				10	10	0	EGFR(+2.45),KLF4(+1.98),MMP2(+2.64),MYT1(+2.81),NKD1(+2.75),PAX3(+2.67),PPP2R2B(+2.72),TBX3(+6.55),THY1(+1.92),WIF1(+8.64)
transcription regulator	TGFB1I1	0.00254			1.026	7	6	1	CDKN1A(-2.32),FN1(+3.0),FOS(+2.02),KLF4(+1.98),LTBP1(+2.43),LTBP2(+1.8),SMAD7(+1.75)
transcription regulator	PAX2	0.00254			1.772	7	6	1	GRIK2(+4.11),GRIK3(+4.73),GRM5(+3.07),ITGB3(-2.06),MITF(+1.92),SSTR2(+3.34),WNT4(+6.53)
transcription regulator	TBX5	0.00263			0.083	16	12	4	ANKRD1(-2.65),BIRC5(+2.19),CACNA1C(+3.21),CCL2(+2.16),CDC6(+2.07),COL1A1(+3.04),COL3A1(+8.18),CXCR4(+2.78),HEY2(+4.4),IFI16(+2.82),KCNA5(+3.67),MYL7(-2.43),NFATC2(+2.1),NPPB(-2.63),PTGS1(-2.59),RYR2(+2.81)
transcription regulator	ETV5	0.00264			0.401	18	12	6	AGER(-1.91),ALCAM(+3.09),CDH1(+3.1),CLDN1(+1.7),CLDN3(-2.47),CXCR4(+2.78),EGFL6(+1.62),FN1(+3.0),FOXM1(+2.16),ICAM1(-2.26),LMO7(+1.86),MMP2(+2.64),PMP22(+2.85),SCD(-2.76),SNAI2(+6.19),SPP1(-3.22),TJP3(-2.71),WWTR1(+2.19)
transcription regulator	SP6	0.00279				3	3	0	LEF1(+2.55),SPHK1(+1.74),TGFBR2(+2.5)
transcription regulator	PDLIM1	0.00279	1.935			3	3	0	CDH1(+3.1),PDLIM1(+1.94),SNAI1(+2.24)
transcription regulator	TBR1	0.00279	4.504			3	2	1	BCL11B(+4.28),FEZF2(-3.35),RELN(+1.99)
transcription regulator	HMG20B	0.00279				3	3	0	SCN1A(+5.65),SCN2A(+6.01),SCN3A(+4.41)
transcription regulator	PAX6	0.0028			-0.656	32	24	8	ACP5(-2.76),ADAM9(-1.69),ASCL1(+5.3),CDC45(+2.65),CDC6(+2.07),CDCA2(+1.8),CDCA7(+3.62),CDK6(+2.2),CELF4(+2.54),CRISPLD2(+7.46),CUX2(+1.74),EOMES(+2.75),ETV6(+1.96),FUT9(+2.84),GAA(-1.56),GNG2(+1.65),HAS2(+4.55),IQGAP3(+1.88),ISL1(+4.84),KRT10(-1.65),LAMTOR5(-1.62),MITF(+1.92),NTN1(+2.48),PAX3(+2.67),PCSK2(+10.15),SIX3(-4.44),SOCS1(+3.16),SOX2(-2.72),TBR1(+4.5),TNC(+2.03),TYR(+6.76),UCHL5(-1.78)
transcription regulator	MESP2	0.00287		Activated	2.449	6	6	0	FOXC1(+7.92),MYOCD(+2.22),PAX3(+2.67),SNAI1(+2.24),SNAI2(+6.19),UNCX(+3.63)
transcription regulator	CDX2	0.00288			0.451	24	18	6	AXIN2(+3.19),B3GALT5(+2.24),BIRC5(+2.19),CDH1(+3.1),CDKN1A(-2.32),CLDN1(+1.7),DLL1(-2.54),ETS1(+1.84),FGF1(+2.78),ITGB4(+1.99),KLF4(+1.98),LEF1(+2.55),MEIS1(-2.08),MTUS1(+3.45),MYCN(+3.19),NR2F2(-2.13),PAX3(+2.67),POU5F1(+11.76),SALL4(-2.67),SH3PXD2A(+2.5),SNAI1(+2.24),SOX2(-2.72),SOX9(+1.56),WNT3A(+1.77)
transcription regulator	NANOG	0.0029			1.5	22	17	5	AHR(+3.68),BIRC5(+2.19),CDC25A(+1.75),CDK6(+2.2),COL3A1(+8.18),E2F1(+2.7),EOMES(+2.75),FOS(+2.02),FUS(+1.71),HSPA1A/HSPA1B(-1.64),ISL1(+4.84),KDR(+2.05),KLF4(+1.98),LHX5(-1.77),MEIS1(-2.08),MYCN(+3.19),PHACTR2(+1.54),POU5F1(+11.76),RAPGEF5(+2.11),SALL4(-2.67),SOX2(-2.72),TBX3(+6.55)
transcription regulator	KLF11	0.0029			-0.372	22	18	4	ADAMTS8(+1.83),CCL2(+2.16),CHRM3(+2.33),CHRNA3(+3.24),CHRNA5(+2.29),CHRNB2(+2.52),COL3A1(+8.18),CXCR4(+2.78),DCN(+24.15),DRD4(-3.01),GREM1(-1.83),ITGB3(-2.06),ITGB5(+1.71),LOX(+1.9),LTBP1(+2.43),MAOB(+1.93),MMP2(+2.64),PLAU(-2.34),SMAD7(+1.75),SNAI1(+2.24),TGFB3(+5.19),TGFBR2(+2.5)
transcription regulator	FOXA2	0.00291			-0.311	33	24	9	A2M(+4.05),ABCC8(+4.12),ALOX15(-2.39),CDH1(+3.1),CXCR4(+2.78),DCT(+10.71),DCX(+1.97),FABP5(+2.52),FOXO1(+2.33),HES6(+2.18),HHIP(+2.74),HPGD(+5.34),IGFBP5(+2.03),ISL1(+4.84),LPL(-2.98),MLXIPL(-4.26),MTUS1(+3.45),MYOCD(+2.22),NEUROG2(+5.17),NPTX2(+2.67),PDHX(-1.88),PKM(+1.93),SCD(-2.76),SH3PXD2A(+2.5),SLC2A4(-2.3),SMOC1(+2.47),SNAI1(+2.24),SOD3(-2.52),ST18(+4.07),TBX1(+5.18),TH(+10.96),WNT7A(-2.36)…
transcription regulator	WWTR1	0.00305	2.186		-0.311	10	8	2	CD44(+3.93),COL1A1(+3.04),FN1(+3.0),ICAM1(-2.26),POU5F1(+11.76),SMAD7(+1.75),SPP1(-3.22),THY1(+1.92),TP63(+7.65),YAP1(+1.52)
transcription regulator	REL	0.00309			0.887	35	23	12	AHR(+3.68),APLF(-2.7),ARFGAP3(-1.62),BACH2(+1.83),BBC3(-1.77),BIRC5(+2.19),BRCA1(+1.77),CACNA1E(+4.04),CCL2(+2.16),CDC6(+2.07),CDH1(+3.1),CDKN1A(-2.32),CTSV(+2.48),DDX18(-1.87),DHFR(+1.79),E2F3(+1.56),EDARADD(+3.77),FADS2(-1.92),FN1(+3.0),FOS(+2.02),ICAM1(-2.26),IRF6(+2.66),KCNK6(-2.73),KDR(+2.05),MED12L(-1.8),PARP14(+1.67),PCBP4(+1.8),RDH10(+5.3),SLC7A6(+2.66),SNAI1(+2.24),SNAI2(+6.19),SORBS1(+3…
transcription regulator	SOX9	0.00327	1.559	Activated	2.845	14	13	1	CDKN1A(-2.32),COL1A1(+3.04),COL2A1(+1.9),CREB3L2(+1.81),CXCR4(+2.78),DCT(+10.71),FOS(+2.02),H19(+1.99),MITF(+1.92),SNAI2(+6.19),SOX8(+2.06),SOX9(+1.56),TYR(+6.76),WNT3(+2.2)
transcription regulator	PAX9	0.00353		Activated	2	4	4	0	BMP4(+1.85),COL2A1(+1.9),MSX1(+6.43),SOX9(+1.56)
transcription regulator	PBX2	0.00353				4	3	1	CCL2(+2.16),FOS(+2.02),PDGFRA(+3.34),PLAU(-2.34)
transcription regulator	HOXC6	0.00369		Activated	2.345	10	10	0	CNTN1(+3.34),COL23A1(+2.5),DCN(+24.15),FAM49A(+2.03),GAS2L3(+1.61),PDGFRA(+3.34),RUNX1(+5.8),SH3D19(+1.61),SLC1A3(+5.03),ZNF536(+2.04)
transcription regulator	MEF2C	0.00387			1.116	22	16	6	BACH2(+1.83),CACNA1C(+3.21),CCL2(+2.16),CDKN1A(-2.32),COL1A1(+3.04),COL2A1(+1.9),COL3A1(+8.18),CXCR4(+2.78),FOS(+2.02),FRZB(+4.89),KCNA5(+3.67),KLF2(+3.29),MYL7(-2.43),NFATC2(+2.1),NPPB(-2.63),PLAGL1(+1.91),PTGS1(-2.59),PTH1R(+1.87),RYR2(+2.81),SLC2A4(-2.3),SOST(+3.32),TNNT1(-3.41)
transcription regulator	YY2	0.00398			-0.692	6	4	2	CXCR4(+2.78),FOS(+2.02),MYL7(-2.43),POU5F1(+11.76),SOX2(-2.72),TDGF1(+5.05)
transcription regulator	ACTN4	0.00398			1.387	6	6	0	CCL2(+2.16),DCN(+24.15),FOS(+2.02),MYCN(+3.19),PDLIM1(+1.94),SNAI1(+2.24)
transcription regulator	ID3	0.00407			0.91	30	21	9	ADGRG1(-1.62),CCNB1(+1.58),CD44(+3.93),CD72(-2.04),CDC25B(+2.16),CDC6(+2.07),CDK20(-1.81),CDKN1A(-2.32),CXCR4(+2.78),E2F2(+4.11),EOMES(+2.75),ETS2(+2.51),FOXO1(+2.33),HES5(-2.3),ICAM1(-2.26),IFI16(+2.82),INHBB(+5.09),IRF6(+2.66),ITGB3(-2.06),LMO2(+2.46),MMP2(+2.64),NEUROD6(+7.64),NOTCH1(-1.48),PIK3R1(+2.25),PKD2(+1.59),RAPGEF4(+2.61),SMAD7(+1.75),SOCS3(+2.95),TGFBR3(-1.91),TRAF3(+1.71)
transcription regulator	ZNF281	0.00435			0.563	8	5	3	CCL2(+2.16),CXCR4(+2.78),FANCA(+2.73),LGR5(-3.4),ODC1(-1.74),PTGS1(-2.59),XRCC2(+2.27),XRCC3(+1.7)
transcription regulator	ID2	0.00455			0.824	29	21	8	CCNB1(+1.58),CD44(+3.93),CDC25B(+2.16),CDC6(+2.07),CDH1(+3.1),CDK20(-1.81),CDKN1A(-2.32),CXCR4(+2.78),E2F2(+4.11),EOMES(+2.75),ETS2(+2.51),FGFR3(-2.34),FOXO1(+2.33),HES5(-2.3),ICAM1(-2.26),IFI16(+2.82),INHBB(+5.09),IRF6(+2.66),ITGB3(-2.06),LMO2(+2.46),MMP2(+2.64),NOTCH1(-1.48),PIK3R1(+2.25),PKD2(+1.59),RAPGEF4(+2.61),SMAD7(+1.75),SOCS3(+2.95),TGFBR3(-1.91),TRAF3(+1.71)
transcription regulator	MSC	0.00456		Activated	3.464	12	11	1	CCL2(+2.16),CHL1(+2.12),DCT(+10.71),DDX60(+2.55),IFI44(+4.26),IFI44L(+4.8),ITGA9(+2.27),PAG1(+1.67),PIEZO2(+3.14),PSD3(+1.71),SPP1(-3.22),SYNE2(+1.51)
transcription regulator	ETS1	0.00465	1.837		0.566	32	20	12	BCL11A(+3.04),BMP4(+1.85),BRCA1(+1.77),BTRC(+1.67),CCL2(+2.16),CD44(+3.93),CDK11A(-1.68),CDK6(+2.2),CDKN1A(-2.32),COL2A1(+1.9),CYP24A1(+8.89),DNAJA3(-1.56),ETS1(+1.84),ETS2(+2.51),FN1(+3.0),GABRE(+2.41),HPGD(+5.34),HSPA1A/HSPA1B(-1.64),ICAM1(-2.26),INSIG1(-2.21),ITGB3(-2.06),MMP2(+2.64),NOS3(-5.35),PLAU(-2.34),RUNX1(+5.8),RUNX3(+7.22),SEC23IP(-1.76),SNAI1(+2.24),SPP1(-3.22),SYVN1(-1.52),TGFBR2(+2…
transcription regulator	HNF1B	0.0047			-0.053	20	19	1	B3GALT5(+2.24),CD44(+3.93),CDH1(+3.1),CLDN1(+1.7),COL5A1(+2.19),FBLIM1(+2.57),FN1(+3.0),FZD1(+1.9),HMGA2(+2.05),LAMB1(+1.98),MAFB(+3.39),MMP2(+2.64),MPZL2(+2.59),PCSK9(+6.83),PKD2(+1.59),PLAU(-2.34),PMP22(+2.85),PTGIS(+1.64),SNAI1(+2.24),SNAI2(+6.19)
transcription regulator	PML	0.00479			-0.569	25	13	12	ACADL(+2.1),BIRC5(+2.19),BRCA1(+1.77),BST2(-3.56),CDKN1A(-2.32),CXCR4(+2.78),DDX60(+2.55),EGFR(+2.45),FTL(-2.22),HLA-DMB(-3.43),HMGCR(-2.13),IFI44(+4.26),IFI44L(+4.8),IFITM1(-1.87),LDLR(-1.85),LPL(-2.98),MAP2K1(-1.55),PLSCR1(+1.97),SCD(-2.76),SNAI1(+2.24),SNAI2(+6.19),SREBF2(-1.62),STMN1(+1.8),TBX2(+2.41),UBE2M(-1.62)
transcription regulator	BMI1	0.00512				13	11	2	BNIP3(-1.92),CDH1(+3.1),CDKN1A(-2.32),CLVS2(+6.03),DLC1(+2.74),H2AFX(+1.72),LOX(+1.9),MYT1(+2.81),PARP9(+2.49),SFN(+4.58),ST18(+4.07),VEGFC(+2.34),WNT10B(+2.6)
transcription regulator	TFAP2A	0.00512	4.488	Inhibited	-2.126	18	14	4	ALCAM(+3.09),BIRC5(+2.19),BOK(+2.12),CDH1(+3.1),CDKN1A(-2.32),CHRNA3(+3.24),CHRNA7(+1.94),DCLK1(+4.51),EGFR(+2.45),HRK(+2.06),KLF4(+1.98),LIPA(-2.07),MCM5(+2.08),MMP2(+2.64),NOS1(+2.43),PAG1(+1.67),PLAU(-2.34),PSAP(-1.61)
transcription regulator	EGR3	0.00526			1.897	10	7	3	HS3ST2(+4.26),LMO7(+1.86),NOTCH1(-1.48),PDE3A(+5.5),RET(+2.45),SLC15A2(-2.8),SLIT2(-1.78),SOCS1(+3.16),SOCS3(+2.95),SOX9(+1.56)
transcription regulator	CNOT7	0.0054				8	5	3	BST2(-3.56),CLDN1(+1.7),CMPK2(+2.05),IFI44L(+4.8),IFITM1(-1.87),PLSCR1(+1.97),PPM1K(-2.12),SLC7A11(+3.3)
transcription regulator	SOX1	0.00555		Inhibited	-3.207	14	13	1	ANGPT1(+5.6),APCDD1(+15.97),BMPER(+5.67),COBLL1(+1.75),EOMES(+2.75),EPHA2(-1.74),FRZB(+4.89),INHBA(+3.11),IRX3(+4.51),NRP1(+1.9),PDGFRA(+3.34),POU4F1(+8.63),WNT3(+2.2),YAP1(+1.52)
transcription regulator	NFIC	0.00562				7	5	2	ADAM12(+3.56),ALDOA(-1.51),CCNB1(+1.58),CDKN1A(-2.32),HMGB1(+1.72),PDGFRA(+3.34),RPE65(+4.13)
transcription regulator	MKX	0.0059	3.011			4	4	0	COL1A1(+3.04),COL3A1(+8.18),SOX9(+1.56),TNMD(+2.38)
transcription regulator	GON4L	0.00614				5	5	0	CCNA2(+1.74),CCNB1(+1.58),E2F2(+4.11),MKI67(+2.36),SKP2(+1.87)
transcription regulator	POU3F2	0.00614			0.762	5	4	1	ALDOC(-3.65),CDK5R1(+2.97),CHGA(+14.1),MITF(+1.92),SYP(+2.92)
transcription regulator	CBX2	0.00614			1.131	5	4	1	AHR(+3.68),CDKN1A(-2.32),LHX9(+18.09),RUNX1(+5.8),SOX9(+1.56)
transcription regulator	TRIM29	0.00651				3	2	1	CD44(+3.93),CDKN1A(-2.32),SNAI1(+2.24)
transcription regulator	MTF2	0.00651				3	3	0	KLF4(+1.98),POU5F1(+11.76),TBX3(+6.55)
transcription regulator	FEZF2	0.00651	-3.354			3	3	0	BCL11B(+4.28),BHLHE22(+5.15),TBR1(+4.5)
transcription regulator	PAX8	0.00664			1.25	8	7	1	CCNA2(+1.74),CDC6(+2.07),DHFR(+1.79),DIO3(+6.08),E2F1(+2.7),HCN2(+2.31),TERC(-2.48),TH(+10.96)
transcription regulator	HOXC8	0.00664			-0.563	8	5	3	ANKRD1(-2.65),ASS1(+2.45),GAS1(+3.38),PLAGL1(+1.91),PMP22(+2.85),SERPINF1(+1.8),SLC16A3(-2.12),SPP1(-3.22)
transcription regulator	UXT	0.00664			-1.499	8	6	2	BRIP1(+2.46),CCNA2(+1.74),CDC6(+2.07),ENO2(-1.81),F5(+4.74),HPGD(+5.34),PMEPA1(+3.47),TNFRSF10B(-1.99)
transcription regulator	CEBPD	0.00691	2.362		0.096	17	14	3	BIRC5(+2.19),BRCA1(+1.77),CCNB1(+1.58),CDKN1C(-1.78),CEBPD(+2.36),CTSV(+2.48),CXCR4(+2.78),CYP1A1(+5.71),CYP2E1(-2.25),DDIT3(-2.04),FOS(+2.02),IGFBP5(+2.03),MBP(+2.44),MITF(+1.92),PAX3(+2.67),PDGFRA(+3.34),VEGFC(+2.34)
transcription regulator	CUX1	0.00701			1.536	12	10	2	CCNA2(+1.74),CDH1(+3.1),CDKN1A(-2.32),HIF1AN(-1.52),HIST1H1B(+2.94),HIST1H4C(+1.86),MMP2(+2.64),PCDH10(+2.31),SNAI1(+2.24),SNAI2(+6.19),WNT1(+3.45),WNT6(+3.83)
transcription regulator	SMARCD3	0.00709		Activated	2.433	6	6	0	ALCAM(+3.09),CD44(+3.93),COL1A1(+3.04),COL2A1(+1.9),MITF(+1.92),SOX9(+1.56)
transcription regulator	NONO	0.00709		Inhibited	-2.236	6	5	1	NOS3(-5.35),PDE10A(+1.72),PDE11A(+2.31),PDE1C(+1.97),PDE3A(+5.5),PDE4D(+2.64)
transcription regulator	TAF4B	0.0071			1.4	7	6	1	FN1(+3.0),INHBA(+3.11),INHBB(+5.09),IRF1(+1.72),RET(+2.45),SPP1(-3.22),TGFB3(+5.19)
transcription regulator	PROX1	0.0071			-1.234	7	5	2	CDKN1C(-1.78),FGFR3(-2.34),HEY1(+2.26),ITGA9(+2.27),KDR(+2.05),NRP1(+1.9),RGS4(+5.61)
transcription regulator	TFAP2C	0.0071			-0.448	14	12	2	ALCAM(+3.09),CD44(+3.93),CDH1(+3.1),CDKN1A(-2.32),EGFR(+2.45),EOMES(+2.75),FOXC1(+7.92),IGFBP5(+2.03),MBP(+2.44),MMP2(+2.64),NRP1(+1.9),RET(+2.45),SEMA3B(-1.57),TK1(+3.69)
transcription regulator	KLF1	0.00732			0.883	10	8	2	ADD2(+2.03),AQP1(+2.14),BCL11A(+3.04),CD44(+3.93),CDKN1A(-2.32),DNASE2(-1.68),E2F2(+4.11),KLF3(+1.55),SPTB(+2.43),TFRC(+1.88)
transcription regulator	Foxp1	0.00732			-0.739	10	9	1	CNR1(+8.01),DAB1(+2.05),E2F1(+2.7),E2F2(+4.11),E2F3(+1.56),ELAVL4(+5.59),HCN1(+3.12),LMO2(+2.46),MYCN(+3.19),RYR1(-3.07)
transcription regulator	PAX1	0.00732			0.632	10	7	3	ASCL1(+5.3),COL2A1(+1.9),CRABP2(-1.58),EMX2(-1.97),IRF6(+2.66),KRT17(+7.24),LHX5(-1.77),PDGFRA(+3.34),SOX9(+1.56),THY1(+1.92)
transcription regulator	KMT2D	0.00752			1.154	29	20	9	ADGRA3(+1.77),ADGRG1(-1.62),ADGRG2(+3.87),BTG3(-2.04),CA10(+5.2),CA4(-6.57),CDCA7(+3.62),E2F1(+2.7),ENO3(-3.41),FBXL7(+2.12),HAUS4(-1.64),IRF1(+1.72),IRF6(+2.66),KLF4(+1.98),KRT10(-1.65),KRT17(+7.24),KRT6A(+7.11),LAMB3(+4.06),LOXL1(+1.92),MEOX1(+2.78),MIR17HG(+1.9),NAALADL2(+2.26),NPR3(+2.96),POLE(+1.81),PPP2R2B(+2.72),PTGR2(-1.74),SIX4(+1.59),TGM1(-2.4),TRIQK(-1.86)
transcription regulator	SPDEF	0.00758		Inhibited	-2.718	13	11	2	CDKN1A(-2.32),COL13A1(+2.88),COL16A1(+5.19),COL1A1(+3.04),COL5A1(+2.19),COL6A2(+1.72),EGFR(+2.45),FGFR1(+1.86),FZD8(+3.03),LEF1(+2.55),PLAU(-2.34),SNAI2(+6.19),TNC(+2.03)
transcription regulator	ALX1	0.00826				2	2	0	CDH1(+3.1),SNAI1(+2.24)
transcription regulator	NPAS3	0.00826	1.768			2	2	0	FGFR1(+1.86),RELN(+1.99)
transcription regulator	Cops2	0.00826				2	1	1	CDKN1A(-2.32),POU5F1(+11.76)
transcription regulator	GLI2	0.00844		Activated	3.212	18	15	3	BMP4(+1.85),CDC45(+2.65),CDH1(+3.1),CDKN1A(-2.32),E2F1(+2.7),HHIP(+2.74),KRT10(-1.65),KRT17(+7.24),MEOX1(+2.78),MITF(+1.92),MYCN(+3.19),NTN1(+2.48),PAX3(+2.67),SFRP1(+3.48),SNAI1(+2.24),SOX9(+1.56),SPP1(-3.22),TP63(+7.65)
transcription regulator	GATA3	0.00845			-1.098	32	19	13	ACBD4(-1.82),ASCL1(+5.3),AURKAIP1(-1.75),BCL11A(+3.04),BCL11B(+4.28),BMF(+1.59),BOK(+2.12),CCDC7(-3.05),CDH1(+3.1),CDKN1A(-2.32),CRABP2(-1.58),CXCR4(+2.78),EBF1(+17.28),EOMES(+2.75),ERCC5(-1.9),ETS1(+1.84),FN1(+3.0),FOS(+2.02),ICAM1(-2.26),IRF6(+2.66),KLF4(+1.98),KRT17(+7.24),LHX5(-1.77),LOX(+1.9),NOTCH1(-1.48),PTGS1(-2.59),RAD50(-2.04),RET(+2.45),RUNX1(+5.8),RUNX3(+7.22),SLC27A2(-2.29),TGM1(-2.4)
transcription regulator	FOXP1	0.00851	2.329		1	9	9	0	DPYD(+2.12),GAP43(+4.63),GAS1(+3.38),NFIA(+5.99),PCDH10(+2.31),POU5F1(+11.76),ST8SIA2(+2.17),TDGF1(+5.05),WNT1(+3.45)
transcription regulator	TBX3	0.00852	6.548		0	5	4	1	CDH1(+3.1),LBH(+1.99),POU5F1(+11.76),SOX2(-2.72),TBX2(+2.41)
transcription regulator	NOTCH4	0.00884			0.478	7	4	3	ANGPT1(+5.6),HES5(-2.3),HEY1(+2.26),HEY2(+4.4),NOTCH1(-1.48),RGS5(+3.25),TIE1(-5.72)
transcription regulator	RYBP	0.00913				4	4	0	CDC6(+2.07),MSX1(+6.43),PAX3(+2.67),RUNX1(+5.8)
transcription regulator	HOXB5	0.00913		Activated	2	4	2	2	ITGB3(-2.06),MMP2(+2.64),PLAU(-2.34),RET(+2.45)
transcription regulator	E2F6	0.00914		Inhibited	-2.813	12	12	0	BRCA1(+1.77),CDC25A(+1.75),CDC45(+2.65),CDC6(+2.07),DHFR(+1.79),E2F1(+2.7),E2F2(+4.11),H19(+1.99),MCM2(+2.05),MCM5(+2.08),RRM2(+3.05),RYR2(+2.81)
transcription regulator	MEF2D	0.00914			1.248	12	11	1	BACH2(+1.83),CDC6(+2.07),CDH1(+3.1),COL3A1(+8.18),FN1(+3.0),FOS(+2.02),KLF2(+3.29),MCM5(+2.08),MYOCD(+2.22),SLC2A4(-2.3),SOST(+3.32),TGFB3(+5.19)
transcription regulator	DLX2	0.00918	2.734		0.058	6	4	2	ARX(-5.71),BMPER(+5.67),CDKN1A(-2.32),DLX2(+2.73),TGFBR2(+2.5),WNT1(+3.45)
transcription regulator	MSX1	0.00918	6.431	Activated	2.2	6	5	1	BMP4(+1.85),CDKN1A(-2.32),COL2A1(+1.9),MSX1(+6.43),SFRP1(+3.48),WNT1(+3.45)
transcription regulator	ID1	0.00969			0.827	13	7	6	CDKN1A(-2.32),E2F1(+2.7),FGFR3(-2.34),FN1(+3.0),ICAM1(-2.26),IFI16(+2.82),MMP2(+2.64),NEUROD6(+7.64),NOTCH1(-1.48),POU5F1(+11.76),SCD(-2.76),SNAI1(+2.24),SOX2(-2.72)
transcription regulator	SOX17	0.00974			-1.432	8	5	3	AXIN2(+3.19),FOS(+2.02),KDR(+2.05),LAMB1(+1.98),NR2F1(-5.84),POU5F1(+11.76),SALL4(-2.67),SOX2(-2.72)
transcription regulator	ZBTB7B	0.00974			-0.471	8	8	0	AHR(+3.68),COL1A1(+3.04),COL2A1(+1.9),EOMES(+2.75),IL1R1(+1.71),KLF4(+1.98),NRP1(+1.9),RUNX3(+7.22)
transcription regulator	BCL6	0.00998			1.402	30	23	7	A2M(+4.05),ALCAM(+3.09),BACH2(+1.83),CCL2(+2.16),CD44(+3.93),CD72(-2.04),CDKN1A(-2.32),CISH(+2.15),COL1A1(+3.04),COL2A1(+1.9),CUX2(+1.74),DOCK10(+2.67),ENTPD1(-1.58),HERC5(-3.42),IL13RA1(+1.55),ITPRIP(+1.65),LBH(+1.99),LDLR(-1.85),MIR17HG(+1.9),MITF(+1.92),ORC1(+2.7),PDP2(-2.23),RAD50(-2.04),RGS4(+5.61),SH3D19(+1.61),SH3PXD2B(+1.65),SOCS2(+3.94),SOCS3(+2.95),SOX9(+1.56),UBA7(+3.19)
transcription regulator	CREBZF	0.0115		Activated	2.216	5	0	5	DDIT3(-2.04),HERPUD1(-1.74),HSPA1A/HSPA1B(-1.64),HSPA5(-1.75),INSIG1(-2.21)
transcription regulator	RCOR1	0.0115				5	5	0	COL1A1(+3.04),SCN1A(+5.65),SCN2A(+6.01),SMAD7(+1.75),STMN2(+2.47)
transcription regulator	TFDP1	0.0116			1.432	8	7	1	CDC6(+2.07),CDKN1A(-2.32),DHFR(+1.79),E2F1(+2.7),FGFR1(+1.86),MYBL2(+3.14),MYCN(+3.19),STMN1(+1.8)
transcription regulator	ETV4	0.0116	2.16		0.642	8	7	1	CDH1(+3.1),CXCR4(+2.78),ETV4(+2.16),FN1(+3.0),HPGD(+5.34),SPP1(-3.22),TGFBR2(+2.5),WWTR1(+2.19)
transcription regulator	SALL4	0.0117	-2.672			6	3	3	CD44(+3.93),FBXO15(-2.33),LRRC4(+1.78),POU5F1(+11.76),SALL4(-2.67),SOX2(-2.72)
transcription regulator	CREM	0.0121			-1.216	23	9	14	CCNB1(+1.58),COL3A1(+8.18),CRABP2(-1.58),CREB3L4(-2.0),CYP51A1(-1.69),FOS(+2.02),FRMD6(+1.78),HMGCR(-2.13),HMGCS1(-2.27),IDI1(-2.27),INA(+4.47),LDLR(-1.85),MKNK2(-1.61),MSMO1(-2.26),NOS1(+2.43),NOTCH1(-1.48),PDE3A(+5.5),PDP2(-2.23),PER1(-2.15),PGK1(-1.73),RYR2(+2.81),SPTY2D1(-2.28),TH(+10.96)
transcription regulator	CCAR1	0.0121				3	3	0	CEBPD(+2.36),EPAS1(+2.73),SPHK1(+1.74)
transcription regulator	HMG20A	0.0121				3	2	1	CDH1(+3.1),CLDN12(-1.74),SNAI1(+2.24)
transcription regulator	OLIG2	0.0121				3	2	1	GPR17(+2.78),NOTCH1(-1.48),S100B(+2.47)
transcription regulator	PHOX2A	0.0121				3	3	0	CHRNA3(+3.24),RET(+2.45),TH(+10.96)
transcription regulator	SF1	0.0121				3	2	1	COL1A1(+3.04),FN1(+3.0),ICAM1(-2.26)
transcription regulator	HDAC8	0.0121				3	2	1	BMF(+1.59),SOCS1(+3.16),STX1A(-1.66)
transcription regulator	ELK1	0.0126			0.788	11	7	4	ANKH(+1.95),BMPR2(+2.38),CDKN1A(-2.32),FOS(+2.02),INSIG2(-2.22),JAM2(+2.07),SKP2(+1.87),SLC7A11(+3.3),SNAI1(+2.24),SPP1(-3.22),TNFRSF10B(-1.99)
transcription regulator	HOXA7	0.0132			1.915	7	4	3	ADGRG1(-1.62),CDH1(+3.1),EDNRA(+9.03),EGFR(+2.45),KRT10(-1.65),P2RX3(+6.68),TGM1(-2.4)
transcription regulator	CERS2	0.0133			1.98	4	1	3	ABCC4(-2.19),CDKN1A(-2.32),DDIT3(-2.04),MBP(+2.44)
transcription regulator	E2F8	0.0133				4	4	0	CCNA2(+1.74),CCNB1(+1.58),CDC6(+2.07),E2F1(+2.7)
transcription regulator	PIAS2	0.0133				4	2	2	CDKN1A(-2.32),FOS(+2.02),IRF1(+1.72),LDLR(-1.85)
transcription regulator	NEUROD2	0.0133	2.509		1.98	4	4	0	CNTN2(+4.37),DPYSL3(+1.96),GAP43(+4.63),NEUROD2(+2.51)
transcription regulator	STAT1	0.0134		Activated	2.362	46	36	10	A2M(+4.05),ALDH1A3(+3.21),ALOX15(-2.39),APOL4(+2.77),AXL(-1.57),BIRC5(+2.19),BST2(-3.56),C4A/C4B(+2.69),CCL2(+2.16),CDKN1A(-2.32),CEBPD(+2.36),CMPK2(+2.05),CYP2C8(+2.62),CYP2E1(-2.25),DDX60(+2.55),EIF2AK2(+1.57),FOS(+2.02),FOXO1(+2.33),GLS(+1.63),HEY1(+2.26),ICAM1(-2.26),IFI16(+2.82),IFI44(+4.26),IFI44L(+4.8),IFITM1(-1.87),IL1R1(+1.71),IRF1(+1.72),ISL1(+4.84),KCTD12(+5.06),KLF4(+1.98),LRRTM2(+1.7…
transcription regulator	HDAC6	0.0137	-1.745		0.761	9	7	2	BIRC5(+2.19),CDH1(+3.1),COL1A1(+3.04),CYP1A1(+5.71),CYP1B1(+2.61),LTBP2(+1.8),MST1(-2.01),PLAU(-2.34),SLC1A2(+5.56)
transcription regulator	ARNT	0.0141			0.216	19	12	7	AHR(+3.68),ALDOA(-1.51),ALDOC(-3.65),BNIP3(-1.92),CLDN1(+1.7),CXCR4(+2.78),CYP1A1(+5.71),CYP1B1(+2.61),EPAS1(+2.73),GAS1(+3.38),HES6(+2.18),ITGB3(-2.06),KIF20A(+1.86),NOS3(-5.35),PGK1(-1.73),RGS5(+3.25),S1PR1(-2.26),SOCS3(+2.95),TFRC(+1.88)
transcription regulator	HAND2	0.0149			-1.342	12	7	5	CALB2(+6.38),CCL2(+2.16),COL1A1(+3.04),COL3A1(+8.18),CXCR4(+2.78),GREM1(-1.83),MSX1(+6.43),MYL7(-2.43),NFATC2(+2.1),NPPB(-2.63),PTGS1(-2.59),UFD1(-1.55)
transcription regulator	SMAD1	0.0159			0.342	9	6	3	CDKN1A(-2.32),COL1A1(+3.04),COL2A1(+1.9),HEY1(+2.26),ICAM1(-2.26),IRF1(+1.72),SMAD7(+1.75),SOX9(+1.56),SPP1(-3.22)
transcription regulator	GATA6	0.0161			0.815	27	14	13	ALOX15(-2.39),ASCL1(+5.3),BMP4(+1.85),BMP5(+3.06),BMPR2(+2.38),C4A/C4B(+2.69),CDKN1A(-2.32),CRABP2(-1.58),DAB2(+1.76),EMD(-1.58),EMX2(-1.97),ENGASE(-1.48),ESPL1(+2.25),IRF6(+2.66),KLF2(+3.29),KRT17(+7.24),LGR5(-3.4),LHX5(-1.77),LTBP1(+2.43),NFIA(+5.99),NOS3(-5.35),PDGFRA(+3.34),PGK1(-1.73),POU5F1(+11.76),SCD(-2.76),SOX2(-2.72),WNT7B(-2.48)
transcription regulator	GRHL2	0.018			1.068	6	4	2	CDH1(+3.1),DLL3(+3.98),ERBB3(+2.29),SEMA3B(-1.57),TGM1(-2.4),TP63(+7.65)
transcription regulator	HEY1	0.018	2.257		-0.647	6	4	2	CDKN1A(-2.32),GLS(+1.63),KDR(+2.05),MMP2(+2.64),NR2F2(-2.13),TBX2(+2.41)
transcription regulator	ATF2	0.0185			-0.144	15	9	6	ANGPTL2(+2.25),BCKDHA(-1.77),CCNA2(+1.74),DDIT3(-2.04),ENTPD1(-1.58),FN1(+3.0),FOS(+2.02),MEIS2(+1.86),NOTCH1(-1.48),NPPB(-2.63),PDGFRA(+3.34),PENK(+36.26),PLAU(-2.34),SNAI2(+6.19),TH(+10.96)
transcription regulator	WWC1	0.0186			-1	4	4	0	CDH1(+3.1),FGF1(+2.78),MKI67(+2.36),YAP1(+1.52)
transcription regulator	PRDM8	0.0186	6.172	Inhibited	-2	4	4	0	BHLHE22(+5.15),CALB2(+6.38),EBF3(+4.04),EPHA6(+10.2)
transcription regulator	IFI16	0.0188	2.821		0.137	13	8	5	CCL2(+2.16),CDC25A(+1.75),CDKN1A(-2.32),CYP1A1(+5.71),DHFR(+1.79),E2F2(+4.11),ICAM1(-2.26),IFI16(+2.82),LDLR(-1.85),LPL(-2.98),MAP2K1(-1.55),PCP4(+2.35),TYR(+6.76)
transcription regulator	MEF2A	0.019			0.721	7	5	2	ENO3(-3.41),FOS(+2.02),KLF2(+3.29),MYOCD(+2.22),SLC2A4(-2.3),SOST(+3.32),TGFB3(+5.19)
transcription regulator	PBX1	0.019			1.4	7	4	3	CDH1(+3.1),CDKN1A(-2.32),COL1A1(+3.04),ISL1(+4.84),PAX3(+2.67),PLAU(-2.34),SOX3(-2.3)
transcription regulator	GFI1B	0.0193			-0.339	5	3	2	CDKN1A(-2.32),FOXO1(+2.33),SOCS1(+3.16),SOCS3(+2.95),TGFBR3(-1.91)
transcription regulator	NKX3-2	0.0198				3	2	1	COL2A1(+1.9),FGFR3(-2.34),SOX9(+1.56)
transcription regulator	EHMT1	0.0198				3	2	1	CDH1(+3.1),CDKN1A(-2.32),POU5F1(+11.76)
transcription regulator	YBX1	0.0203			1.083	15	12	3	CDK6(+2.2),CDKN1A(-2.32),COL1A1(+3.04),EGFR(+2.45),FGFR1(+1.86),FOS(+2.02),KLF4(+1.98),MMP2(+2.64),MVP(-2.6),PAPPA(+1.92),PLXNA2(+4.68),RELN(+1.99),SNAI1(+2.24),STC2(-2.04),SV2C(+4.32)
transcription regulator	E2F5	0.0219				6	5	1	CDKN1A(-2.32),DHFR(+1.79),E2F1(+2.7),MYBL2(+3.14),MYCN(+3.19),SERPINB2(+4.74)
transcription regulator	HAND1	0.0219			-0.816	6	4	2	ANGPT1(+5.6),HEY1(+2.26),KDR(+2.05),NOTCH1(-1.48),NRP1(+1.9),TIE1(-5.72)
transcription regulator	MEOX2	0.022			-1.067	8	4	4	ANGPT1(+5.6),CCL2(+2.16),CDKN1A(-2.32),CDKN1C(-1.78),ICAM1(-2.26),ITGB3(-2.06),ITGB5(+1.71),VEGFC(+2.34)
transcription regulator	HDAC3	0.0221			-1.057	15	9	6	CCNB1(+1.58),CDH1(+3.1),CDKN1A(-2.32),E2F2(+4.11),ELOVL5(-2.06),FOS(+2.02),ICAM1(-2.26),NOS3(-5.35),SCD(-2.76),SLC1A2(+5.56),SMAD7(+1.75),SMARCA2(+1.75),SPP1(-3.22),TBX1(+5.18),TBX2(+2.41)
transcription regulator	NKX3-1	0.0222				10	9	1	CTSV(+2.48),ETS1(+1.84),FOS(+2.02),MIR17HG(+1.9),MMP23B(-2.09),PIK3R1(+2.25),POU5F1(+11.76),PRKCB(+2.5),PTPRC(+4.87),RUNX1(+5.8)
transcription regulator	CEBPA	0.0223			0.114	54	38	16	A2M(+4.05),APCDD1(+15.97),ASCL1(+5.3),ASS1(+2.45),CCNA2(+1.74),CDH1(+3.1),CDKN1A(-2.32),CEBPD(+2.36),COL1A1(+3.04),CPS1(-2.96),CRABP2(-1.58),CXCR4(+2.78),DHCR7(-1.88),DHFR(+1.79),E2F1(+2.7),EBF1(+17.28),EMX2(-1.97),FOS(+2.02),FOXM1(+2.16),FOXO1(+2.33),FZD1(+1.9),GAS1(+3.38),GGH(-2.07),HAS2(+4.55),HMGCR(-2.13),HPGD(+5.34),HSPA5(-1.75),ICAM1(-2.26),IRF6(+2.66),ITGB5(+1.71),KLF4(+1.98),KRT17(+7.24),…
transcription regulator	NOSTRIN	0.0225			-0.404	7	4	3	FGF1(+2.78),FN1(+3.0),ITGB3(-2.06),KDR(+2.05),MMP2(+2.64),NOS3(-5.35),PLAU(-2.34)
transcription regulator	ATF6	0.0228			-0.743	11	4	7	DDIT3(-2.04),DERL3(-3.47),FDPS(-1.71),FOS(+2.02),HSPA5(-1.75),LMF1(+3.8),MYOCD(+2.22),SYVN1(-1.52),TNFRSF10B(-1.99),TROAP(+2.17),UNC13B(-1.69)
transcription regulator	SRF	0.023			1.154	43	30	13	A2M(+4.05),ANKRD1(-2.65),ARHGAP20(+3.95),BICC1(+4.24),BPGM(-1.82),CALD1(+1.68),CCDC174(-1.69),CDKN1A(-2.32),CEBPD(+2.36),CLDN1(+1.7),CLDN12(-1.74),CLDN3(-2.47),CXCR4(+2.78),ETS1(+1.84),FGF1(+2.78),FHL2(+2.13),FOS(+2.02),GDA(+2.45),GP1BA(-2.63),HES6(+2.18),ITGA9(+2.27),KDR(+2.05),LBH(+1.99),LDLR(-1.85),LPL(-2.98),LRP4(+1.89),MAP4K4(+1.66),MEIS1(-2.08),MPPED2(+2.7),MYOCD(+2.22),NET1(+2.64),NEUROD6(…
transcription regulator	EBF3	0.0233	4.042			2	1	1	ADCY3(+1.72),SLC2A4(-2.3)
transcription regulator	OSR2	0.0233				2	2	0	OSR1(+4.85),TGFB3(+5.19)
transcription regulator	ELL	0.0233				2	1	1	CDKN1A(-2.32),FOS(+2.02)
transcription regulator	KLF16	0.0233				2	1	1	CDKN1A(-2.32),CYP1A1(+5.71)
transcription regulator	VSX2	0.0233				2	2	0	MITF(+1.92),TFEC(+5.75)
transcription regulator	SOX21	0.0233				2	0	2	HES5(-2.3),SOX2(-2.72)
transcription regulator	MXD3	0.0233				2	1	1	MYCN(+3.19),ODC1(-1.74)
transcription regulator	NOTCH2	0.0239			0	9	7	2	ASCL1(+5.3),CDH1(+3.1),COL1A1(+3.04),EGFR(+2.45),HES5(-2.3),HEY1(+2.26),HEY2(+4.4),RGS5(+3.25),TSPAN33(-1.78)
transcription regulator	TLX3	0.0243			1.987	5	5	0	ASCL1(+5.3),GRIA2(+6.74),GRIA4(+2.25),RET(+2.45),SLC17A6(+7.47)
transcription regulator	SIRT2	0.0243		Inhibited	-2.236	5	0	5	DHCR7(-1.88),FDFT1(-2.01),HMGCR(-2.13),IDI1(-2.27),SQLE(-1.72)
transcription regulator	BRD7	0.0243			-0.975	5	2	3	BBC3(-1.77),CDKN1A(-2.32),CYP1A1(+5.71),RRM2B(-2.58),VCAN(+3.16)
transcription regulator	BACH1	0.0243			0.447	5	4	1	CALM1 (includes others)(+1.49),CXCR4(+2.78),EWSR1(+1.51),SLC7A11(+3.3),SPP1(-3.22)
transcription regulator	KLF2	0.0244	3.29		-0.571	25	18	7	ASS1(+2.45),BMP4(+1.85),CCL2(+2.16),CD44(+3.93),CDKN1A(-2.32),CXCR4(+2.78),CYP1B1(+2.61),DLL1(-2.54),EPAS1(+2.73),FBLN1(+4.81),ITGA4(+4.92),ITGB3(-2.06),ITGB4(+1.99),ITGB5(+1.71),KDR(+2.05),KITLG(+2.68),MAP3K5(+3.69),MVP(-2.6),NOS3(-5.35),NOTCH1(-1.48),PTGIS(+1.64),S1PR1(-2.26),SLCO2A1(+3.13),SOX9(+1.56),TFRC(+1.88)
transcription regulator	KMT2A	0.0248		Activated	2.01	14	11	3	ABTB2(+2.14),CDKN1A(-2.32),ETS1(+1.84),FOXC1(+7.92),LRRC55(+1.99),MEIS1(-2.08),MEIS2(+1.86),MKX(+3.01),PRDM16(-1.93),PRDM8(+6.17),RGS4(+5.61),SATB2(+2.98),SCN1A(+5.65),ZMAT4(+2.46)
transcription regulator	NCOA1	0.0252		Inhibited	-2.244	21	16	5	AHR(+3.68),ALDOA(-1.51),BPGM(-1.82),CDKN1A(-2.32),CYP1A1(+5.71),EOMES(+2.75),ERBB3(+2.29),FOS(+2.02),HAS2(+4.55),HIC1(+2.86),INSM2(+5.63),KDR(+2.05),LIAS(-1.87),MAPK8IP2(+2.79),NFIB(+3.99),NFIX(+13.48),NFKBIZ(+1.86),PLCD1(-2.04),PRLR(+2.46),SORBS1(+3.08),TLE1(+1.74)
transcription regulator	MEN1	0.0254			-1.357	8	6	2	CDH1(+3.1),CDKN1A(-2.32),FOS(+2.02),FOXC1(+7.92),GAS1(+3.38),MEIS1(-2.08),PTN(+2.21),TGFBR2(+2.5)
transcription regulator	ZBTB7A	0.0264			-0.254	6	5	1	CDKN1A(-2.32),FOS(+2.02),H19(+1.99),NRP1(+1.9),PKM(+1.93),RUNX3(+7.22)
transcription regulator	ZFP36	0.0271			-1.171	14	9	5	CDC6(+2.07),CDKN1A(-2.32),CENPA(+2.09),COL3A1(+8.18),E2F1(+2.7),FOS(+2.02),ICAM1(-2.26),IRF1(+1.72),LMO2(+2.46),MXD1(-1.84),PLAU(-2.34),SOCS1(+3.16),SPP1(-3.22),TFRC(+1.88)
transcription regulator	MYBL2	0.0271	3.141	Activated	2.589	9	9	0	BIRC5(+2.19),CCNA2(+1.74),CCNB1(+1.58),CDC25B(+2.16),FOXM1(+2.16),IGFBP5(+2.03),MYBL2(+3.14),PPP3CA(+2.76),TFEC(+5.75)
transcription regulator	SATB1	0.0291			0.211	23	17	6	ADCY3(+1.72),CDH1(+3.1),CDKN1A(-2.32),EPAS1(+2.73),ETS1(+1.84),F5(+4.74),GDF15(-5.46),GNG4(+2.26),HLA-DMB(-3.43),KITLG(+2.68),KLF2(+3.29),LRRN3(+2.19),POU4F1(+8.63),PRKCB(+2.5),RIPOR2(+2.15),RUNX1(+5.8),S1PR1(-2.26),SLC27A2(-2.29),SUN2(+1.86),TMEM117(+2.09),TNFSF13B(-3.18),TRPS1(+1.79),TSPAN17(+1.63)
transcription regulator	HOXA9	0.0292			1.961	24	20	4	ADGRG1(-1.62),ARF1(-1.49),CBX6(+1.78),CCL2(+2.16),CDC6(+2.07),CDH1(+3.1),CISH(+2.15),DCT(+10.71),DLGAP5(+1.73),EDNRA(+9.03),ETS2(+2.51),FZD1(+1.9),IRX3(+4.51),MAFB(+3.39),MBNL1(+1.87),NFIA(+5.99),P2RX3(+6.68),PCDH1(-1.76),PPP1R16B(+5.22),PTPRC(+4.87),RAB31(+2.32),RDX(+1.47),SPP1(-3.22),WNT10B(+2.6)
transcription regulator	ZNF382	0.0296				3	3	0	CDK6(+2.2),HMGA2(+2.05),MITF(+1.92)
transcription regulator	HDAC10	0.0296				3	3	0	DCT(+10.71),MITF(+1.92),MMP2(+2.64)
transcription regulator	HOXA2	0.0296				3	3	0	MEOX1(+2.78),PCP4(+2.35),SOX9(+1.56)
transcription regulator	MED12	0.0296				3	3	0	ASCL1(+5.3),BMP4(+1.85),NEUROG2(+5.17)
transcription regulator	PPP1R13L	0.0301			1.452	5	3	2	BBC3(-1.77),CDKN1A(-2.32),CLDN1(+1.7),H2AFX(+1.72),TP63(+7.65)
transcription regulator	STAT5A	0.0313			1.194	36	27	9	A2M(+4.05),AXIN2(+3.19),BCL11A(+3.04),CDC25C(+1.99),CDH1(+3.1),CDK6(+2.2),CDKN1A(-2.32),CEMIP(+3.39),CISH(+2.15),CYP1B1(+2.61),CYP27B1(-2.51),EOMES(+2.75),EPAS1(+2.73),EPOR(-2.66),FOS(+2.02),FOSL2(+1.73),GASK1B(-1.74),HIST2H2AA3/HIST2H2AA4(+1.76),ICAM1(-2.26),IGFALS(-2.66),IGFL2(+5.95),IRF1(+1.72),LAMB3(+4.06),LEF1(+2.55),NOL3(-2.32),PCP4(+2.35),PRLR(+2.46),PROM2(-2.06),RIN2(+2.36),SOCS1(+3.16),S…
transcription regulator	GTF2I	0.0324				4	2	2	CDKN1A(-2.32),FOS(+2.02),HSPA5(-1.75),KDR(+2.05)
transcription regulator	SP7	0.0324				4	3	1	COL1A1(+3.04),SATB2(+2.98),SOST(+3.32),SPP1(-3.22)
transcription regulator	ASXL1	0.0332			1.89	8	2	6	ENO2(-1.81),FAM162A(-1.96),LPL(-2.98),MCM2(+2.05),PELI2(+2.09),PGK1(-1.73),SCD(-2.76),SLC2A4(-2.3)
transcription regulator	CALR	0.0332			1.026	8	4	4	CDKN1A(-2.32),COL1A1(+3.04),COL3A1(+8.18),CRABP2(-1.58),FN1(+3.0),ICAM1(-2.26),LPL(-2.98),RYR2(+2.81)
transcription regulator	JUNB	0.0338			1.876	18	14	4	COL1A1(+3.04),CYP1B1(+2.61),FBLN2(+2.22),FBLN5(+3.95),FN1(+3.0),HPGD(+5.34),INHBA(+3.11),ITGB3(-2.06),ITGB4(+1.99),MMP2(+2.64),PENK(+36.26),PLAU(-2.34),SCD(-2.76),SERP1(-1.58),SERPINB2(+4.74),SNAI1(+2.24),SNAI2(+6.19),TBX3(+6.55)
transcription regulator	MDM2	0.0341		Activated	2.123	12	10	2	BBC3(-1.77),BIRC5(+2.19),CCNA2(+1.74),CDKN1A(-2.32),E2F1(+2.7),ETS1(+1.84),HIST2H2AA3/HIST2H2AA4(+1.76),INHBB(+5.09),MYCN(+3.19),SFN(+4.58),SNAI2(+6.19),TP63(+7.65)
transcription regulator	CBX5	0.0356		Inhibited	-2.514	17	14	3	AXIN2(+3.19),BCL11A(+3.04),BIRC5(+2.19),CDC25A(+1.75),CDC6(+2.07),CDKN1A(-2.32),CEMIP(+3.39),CYP1B1(+2.61),GASK1B(-1.74),HIST2H2AA3/HIST2H2AA4(+1.76),IGFL2(+5.95),LAMB3(+4.06),LEF1(+2.55),PCP4(+2.35),PROM2(-2.06),RIN2(+2.36),SCN2A(+6.01)
transcription regulator	HDAC4	0.0362				18	15	3	CACNA1C(+3.21),CACNA2D1(+3.79),CCNB1(+1.58),CDKN1A(-2.32),CHN1(-1.64),CNTN1(+3.34),FOS(+2.02),KLF2(+3.29),NECAB1(+2.5),NTM(+3.4),PPP3CA(+2.76),PRKCB(+2.5),RGS4(+5.61),RGS7(+4.3),RTN1(+3.22),SERPINB2(+4.74),SLC2A4(-2.3),SYN2(+3.08)
transcription regulator	SMARCE1	0.0366			0	5	5	0	BRCA1(+1.77),CCNB1(+1.58),CENPF(+1.71),FOS(+2.02),SCN2A(+6.01)
transcription regulator	SMARCC1	0.0366				5	3	2	CDH1(+3.1),CDKN1A(-2.32),EBF1(+17.28),KDR(+2.05),SOX2(-2.72)
transcription regulator	SRSF2	0.0377			0.818	8	6	2	ABCC9(+2.43),CDH1(+3.1),COL1A1(+3.04),DDIT3(-2.04),MAPT(+3.09),MLXIPL(-4.26),RRM2(+3.05),RYR2(+2.81)
transcription regulator	NFAT5	0.0379			0.595	14	11	3	AQP1(+2.14),C1QTNF1(+4.31),CCL2(+2.16),CCN4(+3.55),COL1A1(+3.04),DDIT4(-1.74),JAM2(+2.07),NRG1(+2.27),PTGFRN(+1.66),PTGIS(+1.64),PTGS1(-2.59),RRM2(+3.05),SLC7A2(+7.1),SPP1(-3.22)
transcription regulator	MAF	0.0382			-0.044	11	5	6	CYP51A1(-1.69),FDFT1(-2.01),HMGCR(-2.13),IDI1(-2.27),IL1R1(+1.71),MBP(+2.44),NUAK1(+2.04),PCSK2(+10.15),RAD50(-2.04),S100B(+2.47),SQLE(-1.72)
transcription regulator	TBP	0.0382				11	8	3	CDKN1A(-2.32),COL1A1(+3.04),EDNRA(+9.03),ETS2(+2.51),FN1(+3.0),FOS(+2.02),HMGCR(-2.13),LDLR(-1.85),MIR17HG(+1.9),NKD1(+2.75),PPP2R2B(+2.72)
transcription regulator	SPI1	0.0397			0.604	33	28	5	BCL11A(+3.04),CCNA2(+1.74),CCNB1(+1.58),CD72(-2.04),CDC25A(+1.75),CDK6(+2.2),CDKN1A(-2.32),CMPK2(+2.05),DAB2(+1.76),E2F1(+2.7),E2F2(+4.11),EBF1(+17.28),ETS2(+2.51),FOS(+2.02),FOXO1(+2.33),HIC1(+2.86),IFI44(+4.26),IFI44L(+4.8),IFITM1(-1.87),ITGA4(+4.92),KLF4(+1.98),LEF1(+2.55),LIMD1(+1.54),LMO2(+2.46),LY6E(+1.59),MBP(+2.44),MMP2(+2.64),NOL6(-1.62),PTPRC(+4.87),RUNX3(+7.22),SPP1(-3.22),TFEC(+5.75),…
transcription regulator	FOSB	0.0407			0.826	7	7	0	FOS(+2.02),GRIA2(+6.74),HPGD(+5.34),INHBA(+3.11),MMP2(+2.64),SERPINB2(+4.74),TH(+10.96)
transcription regulator	PURA	0.0411			0	4	2	2	CDKN1A(-2.32),DHFR(+1.79),MBP(+2.44),SPN(-2.84)
transcription regulator	ZBTB33	0.0411				4	1	3	BBC3(-1.77),CDH1(+3.1),CDKN1A(-2.32),PGK1(-1.73)
transcription regulator	HDAC9	0.0411				4	3	1	CCNB1(+1.58),KLF2(+3.29),SLC2A4(-2.3),SMARCA2(+1.75)
transcription regulator	HOXC9	0.0411				4	2	2	BMP4(+1.85),NOS3(-5.35),SPP1(-3.22),WNT3A(+1.77)
transcription regulator	SP2	0.0411				4	2	2	CDKN1A(-2.32),DHFR(+1.79),FOS(+2.02),PTGS1(-2.59)
transcription regulator	MSGN1	0.0415				3	1	2	DLL1(-2.54),DLL3(+3.98),NOTCH1(-1.48)
transcription regulator	PRRX1	0.0415	8.647			3	3	0	FOS(+2.02),SOX9(+1.56),TNC(+2.03)
transcription regulator	ZIC2	0.0415				3	2	1	AXIN2(+3.19),WNT3A(+1.77),WNT7A(-2.36)
transcription regulator	HBP1	0.0415				3	1	2	CDKN1A(-2.32),H1F0(-1.98),MYCN(+3.19)
transcription regulator	NPAT	0.0415				3	3	0	HIST1H1B(+2.94),HIST1H4C(+1.86),HIST2H3C(+2.91)
transcription regulator	BRMS1	0.0415				3	1	2	CXCR4(+2.78),PLAU(-2.34),SPP1(-3.22)
transcription regulator	SKIL	0.0425	1.479		0.547	8	7	1	ADAM12(+3.56),CDH1(+3.1),CDKN1A(-2.32),DCHS1(+1.75),PLSCR1(+1.97),RHOBTB1(+1.57),SKIL(+1.48),SMAD7(+1.75)
transcription regulator	GPS2	0.0428			-1.929	10	8	2	CDK6(+2.2),CDKN1A(-2.32),FOXO1(+2.33),FZD1(+1.9),MBNL1(+1.87),PID1(+4.32),PLA2G3(-3.15),RGL1(+2.0),SOCS1(+3.16),ZNF703(+1.89)
transcription regulator	ATF6B	0.0437				2	0	2	DDIT3(-2.04),HSPA5(-1.75)
transcription regulator	ZNF467	0.0437				2	2	0	CISH(+2.15),FOS(+2.02)
transcription regulator	TBX20	0.0437				2	2	0	MYCN(+3.19),TBX2(+2.41)
transcription regulator	Pou3f1	0.0437				2	2	0	MBP(+2.44),PMP22(+2.85)
transcription regulator	TBPL1	0.0437				2	2	0	FOS(+2.02),TP63(+7.65)
transcription regulator	MAFB	0.0465	3.393	Activated	2.377	13	12	1	ALCAM(+3.09),CACNA2D3(+5.28),CCL2(+2.16),FBLN5(+3.95),GFRA2(+7.05),LGMN(-1.73),MAFB(+3.39),MTSS1(+1.87),NUAK1(+2.04),OLFML3(+3.96),PCSK2(+10.15),SERPINB2(+4.74),SLC40A1(+4.69)
transcription regulator	POU2F1	0.0468				17	10	7	A2M(+4.05),APEX1(+1.71),BBC3(-1.77),CDO1(-1.69),CYP1A1(+5.71),CYP2C8(+2.62),DDIT4(-1.74),ELK3(+2.33),H2AFX(+1.72),ICAM1(-2.26),ISL1(+4.84),LPL(-2.98),LY6E(+1.59),NDRG4(-1.76),RPE65(+4.13),SLC7A11(+3.3),SPP1(-3.22)
transcription regulator	LHX1	0.0489			1.343	15	10	5	ASS1(+2.45),ATP1B1(-2.11),CUBN(+1.91),CYP27B1(-2.51),DAB1(+2.05),FUT9(+2.84),FZD8(+3.03),GCNT1(-2.78),HES5(-2.3),PCP4(+2.35),PKDCC(+3.41),SEMA6D(+3.72),SFRP1(+3.48),SHISA2(+3.07),SLC16A13(-2.54)
transcription regulator	NFYB	0.0494				33	26	7	BCL11B(+4.28),CACNA2D3(+5.28),CBS/CBSL(+2.37),CCDC174(-1.69),CCNB1(+1.58),CDC25A(+1.75),CDC25C(+1.99),CDH1(+3.1),CENPF(+1.71),CNTN4(+3.64),COL1A1(+3.04),DGKI(+3.7),DTL(+2.23),EMX2(-1.97),ENTPD7(-1.71),EPAS1(+2.73),FEZF2(-3.35),GRIA4(+2.25),HIST4H4(+2.14),IGDCC4(+1.65),ITM2C(+1.73),KHDRBS3(+1.85),KIAA0930(+1.68),NAALADL2(+2.26),RHCE/RHD(-9.84),RORB(+4.44),RRM2(+3.05),SALL4(-2.67),SHOX2(+5.67),SNAI…
[truncated: 1,313 more rows]
